# Supplementary material
Source: publisher figshare collection journal article supplement (https://acs.figshare.com/ndownloader/files/22090884)
Supplement: Supplementary file 1 [file 22090884]

## Sheet: Fr1
Peptide	MatchedProteins	Quantity_1	Quantity_2	Quantity_3	Quantity_4	Quantity_5	Quantity_6	QValue	Decoy
+56.063IPSAVGYQPTLATDMGTM+15.995QER	tr|F8W0P7|F8W0P7_HUMAN;tr|F8W079|F8W079_HUMAN;tr|H0YH81|H0YH81_HUMAN;tr|H0YI37|H0YI37_HUMAN;sp|P06576|ATPB_HUMAN	4.3976e+06	1.2969e+06	992323	1226341	244665	779604	0.00237389	FALSE
+56.063AGYSQGATQYTQAQQTR	sp|Q96KR1|ZFR_HUMAN	2922147	1.4736e+06	262254	1.63821e+06	196025	360978	0.00237389	FALSE
+56.063LASVPAGGAVAVSAAPGSAAPAAGSAPAAAEEK+56.063	tr|H0YDD8|H0YDD8_HUMAN;sp|P05387|RLA2_HUMAN	155640192	92019928	20828202	90382720	33194202	41665156	0	FALSE
+56.063SAADSISESVPVGPK+56.063	sp|P45974|UBP5_HUMAN;sp|P45974-2|UBP5_HUMAN	5.96553e+06	7.73123e+06	0	6.53288e+06	3.78925e+06	2.66998e+06	0	FALSE
+56.063VGLSGAPADAC+57.021STAQK+56.063	sp|Q8NFW8|NEUA_HUMAN	3.87194e+06	2.29775e+06	1.66728e+06	1.34872e+06	1.49468e+06	1.42174e+06	0	FALSE
+56.063AGSSTPGDAPPAVAEVQGR	sp|Q7Z6Z7|HUWE1_HUMAN;sp|Q7Z6Z7-2|HUWE1_HUMAN;sp|Q7Z6Z7-3|HUWE1_HUMAN	6818703	3037327	222703	3019040	517588	824409	0	FALSE
+56.063VIAQQVQLQQQQEQVR	sp|Q01664|TFAP4_HUMAN	3053220	1.51038e+06	0	1.89647e+06	208820	1.49667e+06	0.00237389	FALSE
+56.063EK+56.063PYFPIPEEYTFIQNVPLEDR	tr|A0A1W2PQL0|A0A1W2PQL0_HUMAN;tr|A0A1W2PP34|A0A1W2PP34_HUMAN;tr|Q5RI18|Q5RI18_HUMAN;tr|A0A1W2PQ74|A0A1W2PQ74_HUMAN;tr|A0A1W2PPH7|A0A1W2PPH7_HUMAN;tr|A0A1W2PP35|A0A1W2PP35_HUMAN;tr|A0A1W2PPL4|A0A1W2PPL4_HUMAN;tr|A0A1W2PPS1|A0A1W2PPS1_HUMAN;tr|A0A1X7SBS1|A0A1X7SBS1_HUMAN;tr|A0A1W2PRZ7|A0A1W2PRZ7_HUMAN;sp|Q00839|HNRPU_HUMAN;sp|Q00839-2|HNRPU_HUMAN	843934	731602	0	914053	0	0	0.00237389	FALSE
+56.063AITIAGVPQSVTEC+57.021VK+56.063	sp|Q15365|PCBP1_HUMAN	25289680	10720078	0	11985184	1.95245e+06	4498432	0	FALSE
+56.063ALGQNPTNAEVLK+56.063	tr|G3V1V0|G3V1V0_HUMAN;tr|B7Z6Z4|B7Z6Z4_HUMAN;tr|J3KND3|J3KND3_HUMAN;tr|F8W1R7|F8W1R7_HUMAN;tr|G8JLA2|G8JLA2_HUMAN;tr|F8W1I5|F8W1I5_HUMAN;tr|F8VPF3|F8VPF3_HUMAN;sp|P60660|MYL6_HUMAN;sp|P60660-2|MYL6_HUMAN;sp|P14649|MYL6B_HUMAN	16684363	6.84711e+06	731381	8926699	1.67827e+06	3.55873e+06	0	FALSE
+56.063IAPPEAPVTGYMFGK+56.063	sp|P09874|PARP1_HUMAN	3.01183e+06	1.66692e+06	1670518	1.7242e+06	1.60674e+06	855178	0.00237389	FALSE
+56.063LASVPAGGAVAVSAAPGSAAPAAGSAPAAAEEK+56.063	tr|H0YDD8|H0YDD8_HUMAN;sp|P05387|RLA2_HUMAN	152654880	85350136	12748166	98220832	30618872	37828604	0	FALSE
+56.063AAEC+57.021NIVVTQPR	sp|Q08211|DHX9_HUMAN	43809708	18802946	0	24005600	2.86476e+06	12968312	0.00237389	FALSE
+56.063GLVEPVDVVDNADGTQTVNYVPSR	tr|Q60FE5|Q60FE5_HUMAN;tr|A0A087WWY3|A0A087WWY3_HUMAN;sp|P21333|FLNA_HUMAN;sp|P21333-2|FLNA_HUMAN	3.56511e+06	2.3707e+06	710940	1.45135e+06	1.50272e+06	800470	0	FALSE
+56.063LASPSGSTSSGLEVVAPEGTSAPGGGPGTLDDSATIC+57.021R	tr|M0R0K9|M0R0K9_HUMAN;sp|Q13263|TIF1B_HUMAN;sp|Q13263-2|TIF1B_HUMAN	1.97837e+06	1.58094e+06	318856	1.12891e+06	782308	779294	0	FALSE
+56.063LIAPVAEEEATVPNNK+56.063	tr|A0A3B3IS95|A0A3B3IS95_HUMAN;tr|A8MW50|A8MW50_HUMAN;tr|F5H793|F5H793_HUMAN;tr|C9J7H8|C9J7H8_HUMAN;sp|P07195|LDHB_HUMAN	113558176	59256336	5.84579e+06	68070768	12323912	34999988	0.00237389	FALSE
+56.063LVQDVANNTNEEAGDGTTTATVLAR	tr|E7EXB4|E7EXB4_HUMAN;tr|C9JL25|C9JL25_HUMAN;tr|E7ESH4|E7ESH4_HUMAN;sp|P10809|CH60_HUMAN;sp|P10809-2|CH60_HUMAN	200542	149701	22463.5	135687	24980.2	30990.9	0.00237389	FALSE
+56.063LVQDVANNTNEEAGDGTTTATVLAR	tr|E7EXB4|E7EXB4_HUMAN;tr|C9JL25|C9JL25_HUMAN;tr|E7ESH4|E7ESH4_HUMAN;sp|P10809|CH60_HUMAN;sp|P10809-2|CH60_HUMAN	355163488	183287568	38271224	213057968	46894660	110564368	0	FALSE
+56.063AGAIAPC+57.021EVTVPAQNTGLGPEK+56.063	tr|G3V210|G3V210_HUMAN;tr|F8VRK7|F8VRK7_HUMAN;tr|F8VPE8|F8VPE8_HUMAN;tr|F8VWS0|F8VWS0_HUMAN;tr|F8VU65|F8VU65_HUMAN;tr|F8VQY6|F8VQY6_HUMAN;tr|F8VW21|F8VW21_HUMAN;sp|P05388|RLA0_HUMAN;sp|P05388-2|RLA0_HUMAN;sp|Q8NHW5|RLA0L_HUMAN	55953384	31598636	2226047	30207866	6.10504e+06	15450966	0	FALSE
+56.063TASISSSPSEGTPTVGSYGC+57.021TPQSLPK+56.063	sp|Q6PKG0|LARP1_HUMAN;sp|Q6PKG0-3|LARP1_HUMAN	17778254	11580411	4446351	10536320	7073475	8476417	0	FALSE
+56.063AEEYEFLTPVEEAPK+56.063	tr|J3QQX2|J3QQX2_HUMAN;tr|J3KTF8|J3KTF8_HUMAN;tr|J3KRE2|J3KRE2_HUMAN;sp|P52565|GDIR1_HUMAN	28411100	13870705	2262507	11594650	1.61229e+06	2.15887e+06	0	FALSE
+56.063VTIAQGGVLPNIQAVLLPK+56.063	tr|H0YFX9|H0YFX9_HUMAN;tr|A0A0U1RRH7|A0A0U1RRH7_HUMAN;tr|A0A0U1RR32|A0A0U1RR32_HUMAN;sp|Q9BTM1|H2AJ_HUMAN;sp|P04908|H2A1B_HUMAN;sp|P20671|H2A1D_HUMAN;sp|P0C0S8|H2A1_HUMAN;sp|Q96KK5|H2A1H_HUMAN;sp|Q93077|H2A1C_HUMAN;sp|Q16777|H2A2C_HUMAN;sp|Q99878|H2A1J_HUMAN;sp|Q6FI13|H2A2A_HUMAN;sp|Q7L7L0|H2A3_HUMAN	1.36857e+06	1.32379e+06	1.73065e+06	2.71107e+06	0	1.57937e+06	0.00145402	FALSE
+56.063GLQAPAGEPTQEASGVAAAK+56.063	sp|P33897|ABCD1_HUMAN	6.18304e+06	2653978	0	2806827	0	1.95568e+06	0	FALSE
+56.063AAAPAPEEEM+15.995DEC+57.021EQALAAEPK+56.063	sp|P26641|EF1G_HUMAN;sp|P26641-2|EF1G_HUMAN	36505952	18725378	1.47357e+06	17092332	4.9995e+06	7.09876e+06	0	FALSE
+56.063ATENPEQVASEGLPEPVLR	tr|K7ES61|K7ES61_HUMAN;tr|K7ELF1|K7ELF1_HUMAN;tr|K7EKI4|K7EKI4_HUMAN;tr|X6RAY8|X6RAY8_HUMAN;tr|K7ELQ0|K7ELQ0_HUMAN;sp|Q9BYD3|RM04_HUMAN;sp|Q9BYD3-2|RM04_HUMAN	4560773	2.77604e+06	341798	1.81381e+06	744628	2.68298e+06	0.000399521	FALSE
+56.063STSAPQMSPGSSDNQSSSPQPAQQK+56.063	tr|F8W726|F8W726_HUMAN;sp|Q14157|UBP2L_HUMAN;sp|Q14157-1|UBP2L_HUMAN;sp|Q14157-3|UBP2L_HUMAN;sp|Q14157-4|UBP2L_HUMAN;sp|Q14157-5|UBP2L_HUMAN	12828069	7289572	979342	7.02729e+06	1.24558e+06	2.30765e+06	0	FALSE
+56.063VLDNYLTSPLPEEVDETSAEDEGVSQR	sp|O00299|CLIC1_HUMAN	842709	763658	40743.8	903092	0	744141	0	FALSE
+56.063GAEAANVTGPGGVPVQGSK+56.063	tr|H0Y449|H0Y449_HUMAN;sp|P67809|YBOX1_HUMAN	13426611	6.04249e+06	597750	6.92298e+06	585350	3512776	0	FALSE
+56.063ILATPPQEDAPSVDIANIR	tr|A0A0B4J1R6|A0A0B4J1R6_HUMAN;tr|E9PFF2|E9PFF2_HUMAN;sp|P29401|TKT_HUMAN;sp|P29401-2|TKT_HUMAN	37653596	17292280	3.64325e+06	20261322	3559891	10183334	0	FALSE
+56.063TGAPQYGSYGTAPVNLNIK+56.063	tr|A0A0B4J203|A0A0B4J203_HUMAN;sp|Q6UN15|FIP1_HUMAN;sp|Q6UN15-3|FIP1_HUMAN;sp|Q6UN15-4|FIP1_HUMAN;sp|Q6UN15-5|FIP1_HUMAN	8682966	6.98423e+06	0	0	0	3.04411e+06	0	FALSE
+56.063TVPFC+57.021STFAAFFTR	tr|A0A0B4J1R6|A0A0B4J1R6_HUMAN;sp|P29401|TKT_HUMAN;sp|P29401-2|TKT_HUMAN	702468	128777	567811	0	505243	425598	0	FALSE
+56.063TAAANAAAGAAENAFRAP	sp|O14828|SCAM3_HUMAN;sp|O14828-2|SCAM3_HUMAN	3.16126e+06	1783327	753626	2307158	399561	1.11652e+06	0	FALSE
+56.063VSSVPNTSQSYAK+56.063	sp|Q15018|ABRX2_HUMAN	3.08256e+06	1.48599e+06	351401	2.269e+06	468045	1.08489e+06	0.00237389	FALSE
+56.063TQPSSGVDSAVGTLPATSPQSTSVQAK+56.063	sp|Q13428|TCOF_HUMAN;sp|Q13428-2|TCOF_HUMAN;sp|Q13428-3|TCOF_HUMAN;sp|Q13428-4|TCOF_HUMAN;sp|Q13428-8|TCOF_HUMAN	15579822	9148994	881273	8.092e+06	1.13841e+06	3.35769e+06	0	FALSE
+56.063LASEPQDPAAVSLPTSSVPETR	tr|H7C202|H7C202_HUMAN;tr|H7C173|H7C173_HUMAN;tr|H7BZ50|H7BZ50_HUMAN;tr|B8ZZ87|B8ZZ87_HUMAN;sp|Q6P582|MZT2A_HUMAN;sp|Q6NZ67|MZT2B_HUMAN	16809678	6.40195e+06	2.72221e+06	2.63738e+06	2655943	3.20435e+06	0.00237389	FALSE
+56.063TAPYVVTGSVDQTVK+56.063	tr|I3L3N5|I3L3N5_HUMAN;sp|P43034|LIS1_HUMAN	13117380	5.4243e+06	872416	6.21738e+06	804576	1.17937e+06	0	FALSE
+56.063IVLTNPVC+57.021TEVGEK+56.063	sp|Q2VIR3|IF2GL_HUMAN;sp|P41091|IF2G_HUMAN	7.11508e+06	3.96216e+06	151822	3.94189e+06	922844	3.03131e+06	0.000399521	FALSE
+56.063VMTIPYQPM+15.995PASSPVIC+57.021AGGQDR	sp|Q15365|PCBP1_HUMAN	10898066	5358908	4.52686e+06	7.10968e+06	2088163	11278448	0	FALSE
+56.063VTAQGPGLEPSGNIANK+56.063	tr|Q60FE5|Q60FE5_HUMAN;tr|F8WE98|F8WE98_HUMAN;tr|A0A087WWY3|A0A087WWY3_HUMAN;sp|P21333|FLNA_HUMAN;sp|P21333-2|FLNA_HUMAN	10494188	4.1033e+06	1.88076e+06	5.78603e+06	802959	2.95855e+06	0	FALSE
+56.063TK+56.063VHAELADVLTEAVVDSILAIK+56.063K+56.063	sp|P40227|TCPZ_HUMAN;sp|P40227-2|TCPZ_HUMAN	6795516	4.12853e+06	1.10771e+06	3.97698e+06	1.50199e+06	2.36869e+06	0	FALSE
+56.063LQQQQAQQPLQQQQQR	tr|A0A087WXK3|A0A087WXK3_HUMAN;sp|Q9NVH2|INT7_HUMAN;sp|Q9NVH2-2|INT7_HUMAN;sp|Q9NVH2-3|INT7_HUMAN;sp|Q9NVH2-4|INT7_HUMAN	5116989	2.67576e+06	193577	2.82998e+06	531679	1.04146e+06	0	FALSE
+56.063LSGSNPYTTVTPQIINSK+56.063	tr|H7C144|H7C144_HUMAN;tr|F5GXS2|F5GXS2_HUMAN;sp|O43707|ACTN4_HUMAN;sp|O43707-2|ACTN4_HUMAN;sp|O43707-3|ACTN4_HUMAN	12485583	5361649	0	5.42861e+06	624729	3.54804e+06	0	FALSE
+56.063SAAPSTLDSSSTAPAQLGK+56.063	tr|H7C4H2|H7C4H2_HUMAN;sp|Q9Y5M8|SRPRB_HUMAN	8518473	3.30722e+06	0	4907788	617371	2.46535e+06	0	FALSE
+56.063AFLADPSAFVAAAPVAAATTAAPAAAAAPAK+56.063	tr|F8VWS0|F8VWS0_HUMAN;tr|F8W1K8|F8W1K8_HUMAN;sp|P05388|RLA0_HUMAN;sp|P05388-2|RLA0_HUMAN	2149414	513983	0	989348	1.37534e+06	1.49506e+06	0	FALSE
+56.063MDATANDVPSPYEVR	sp|P30101|PDIA3_HUMAN	2.98899e+06	898347	240536	1.11203e+06	1.10566e+06	598652	0	FALSE
+56.063EQGPYETYEGSPVSK+56.063	tr|E9PL69|E9PL69_HUMAN;sp|P23921|RIR1_HUMAN	13211350	10300983	0	11939289	0	806858	0	FALSE
+56.063QSEPAAPPLEVSEEQVAR	tr|X6R5E5|X6R5E5_HUMAN;sp|Q8NBM4|UBAC2_HUMAN;sp|Q8NBM4-2|UBAC2_HUMAN;sp|Q8NBM4-3|UBAC2_HUMAN;sp|Q8NBM4-4|UBAC2_HUMAN	7.23371e+06	3.64172e+06	378109	4355323	985577	1.90862e+06	0	FALSE
+56.063LAEDAPNFDGPAAEGQPGQK+56.063	tr|H0YCH5|H0YCH5_HUMAN;tr|H0YEC5|H0YEC5_HUMAN;tr|H0Y3P2|H0Y3P2_HUMAN;tr|H0YD77|H0YD77_HUMAN;tr|D3DQV9|D3DQV9_HUMAN;sp|P78344|IF4G2_HUMAN;sp|P78344-2|IF4G2_HUMAN	9839314	5.59429e+06	0	6492518	2.33873e+06	4.66572e+06	0.00145402	FALSE
+56.063DATNVGDEGGFAPNILENK+56.063EGLELLK+56.063	tr|A0A2R8Y6G6|A0A2R8Y6G6_HUMAN;sp|P06733|ENOA_HUMAN;sp|P06733-2|ENOA_HUMAN	999314	638212	1.00464e+06	483704	0	251539	0	FALSE
+56.063LVVPATQC+57.021GSLIGK+56.063	sp|Q15365|PCBP1_HUMAN	15729264	5.92677e+06	1.41418e+06	8546197	2.06881e+06	8183490	0	FALSE
+56.063DQTPDENDQVIVK+56.063	sp|Q9NZI8|IF2B1_HUMAN;sp|Q9NZI8-2|IF2B1_HUMAN	15282373	8627684	576547	7518301	880468	1.83451e+06	0	FALSE
+56.063TSTTGVATTQSPTPR	tr|F8WD26|F8WD26_HUMAN;tr|A0A0A0MTE2|A0A0A0MTE2_HUMAN;tr|J3KP06|J3KP06_HUMAN;tr|E9PMS6|E9PMS6_HUMAN;tr|E9PMT2|E9PMT2_HUMAN;sp|Q8WWI1|LMO7_HUMAN;sp|Q8WWI1-2|LMO7_HUMAN;sp|Q8WWI1-3|LMO7_HUMAN;sp|Q8WWI1-4|LMO7_HUMAN;sp|Q8WWI1-5|LMO7_HUMAN	4.87793e+06	2.55225e+06	449553	2.63393e+06	385272	1.21308e+06	0	FALSE
+56.063QTSGGPVDASSEYQQELER	tr|A8MUH2|A8MUH2_HUMAN;sp|P18859|ATP5J_HUMAN;sp|P18859-2|ATP5J_HUMAN	436167	245466	233625	540171	261755	432140	0.000399521	FALSE
+56.063FSNSIPQSQTGNSETATPTNVDLPQVIPK+56.063	sp|P46087|NOP2_HUMAN;sp|P46087-2|NOP2_HUMAN;sp|P46087-4|NOP2_HUMAN	1.96925e+06	680999	905612	1.01408e+06	640777	518593	0	FALSE
+56.063VNQIGSVTESLQAC+57.021K+56.063	tr|A0A2R8Y6G6|A0A2R8Y6G6_HUMAN;sp|P06733|ENOA_HUMAN;sp|P06733-2|ENOA_HUMAN	5363822	2.26414e+06	787027	2.14492e+06	760437	1.13553e+06	0.00237389	FALSE
+56.063VNQIGSVTESIQAC+57.021K+56.063	sp|P13929|ENOB_HUMAN;sp|P13929-2|ENOB_HUMAN;sp|P13929-3|ENOB_HUMAN	5363822	2.26414e+06	787027	2.14492e+06	760437	1.13553e+06	0.00237389	FALSE
+56.063AAIISAEGDSK+56.063AAELIANSLATAGDGLIELR	tr|C9JW96|C9JW96_HUMAN;sp|P35232|PHB_HUMAN	329881	145322	113696	179580	203759	0	0	FALSE
+56.063GAEPETGSAVSAAQC+57.021QGPTR	tr|A0A087WTA5|A0A087WTA5_HUMAN;sp|Q9UI10-2|EI2BD_HUMAN;sp|Q9UI10-3|EI2BD_HUMAN	1.22216e+06	704156	465976	641977	275134	540500	0.000399521	FALSE
+56.063YGK+56.063DATNVGDEGGFAPNILENK+56.063EGLELLK+56.063	tr|A0A2R8Y6G6|A0A2R8Y6G6_HUMAN;sp|P06733|ENOA_HUMAN;sp|P06733-2|ENOA_HUMAN	3.76462e+06	2.5177e+06	903038	960575	546696	6.25287e+06	0.00237389	FALSE
+56.063VM+15.995TIPYQPMPASSPVIC+57.021AGGQDR	sp|Q15365|PCBP1_HUMAN	8476914	3.53919e+06	1.74108e+06	3.86553e+06	1.00411e+06	2170892	0	FALSE
+56.063NQVAMNPTNTVFDAK+56.063	tr|E9PN25|E9PN25_HUMAN;tr|E9PKE3|E9PKE3_HUMAN;tr|E9PNE6|E9PNE6_HUMAN;tr|E9PQQ4|E9PQQ4_HUMAN;tr|E9PLF4|E9PLF4_HUMAN;tr|E9PPY6|E9PPY6_HUMAN;tr|E9PK54|E9PK54_HUMAN;tr|E9PQK7|E9PQK7_HUMAN;sp|P11142|HSP7C_HUMAN;sp|P11142-2|HSP7C_HUMAN	15367026	10574490	1.39599e+06	12425767	3234821	3.23945e+06	0	FALSE
+56.063QGAIVAVTGDGVNDSPALK+56.063	tr|H0Y7C1|H0Y7C1_HUMAN;tr|B1AKY9|B1AKY9_HUMAN;tr|M0R116|M0R116_HUMAN;tr|A0A0A0MT26|A0A0A0MT26_HUMAN;tr|A0A2R8YEY8|A0A2R8YEY8_HUMAN;sp|P13637|AT1A3_HUMAN;sp|P13637-2|AT1A3_HUMAN;sp|P13637-3|AT1A3_HUMAN;sp|P05023|AT1A1_HUMAN;sp|P05023-3|AT1A1_HUMAN;sp|P05023-4|AT1A1_HUMAN;sp|P50993|AT1A2_HUMAN	11286389	5.92377e+06	1.72391e+06	6.57897e+06	3.92049e+06	3.0346e+06	0	FALSE
+56.063GGSVLVTC+57.021STSC+57.021DQPK+56.063	tr|K7EKL8|K7EKL8_HUMAN;sp|P05362|ICAM1_HUMAN	8523326	5980725	4449852	3.77785e+06	4.16764e+06	1.60596e+06	0.00237389	FALSE
+56.063LASVPAGGAVAVSAAPGSAAPAAGSAPAAAEEK+56.063	tr|H0YDD8|H0YDD8_HUMAN;sp|P05387|RLA2_HUMAN	335144928	196340656	27766632	172901808	39462380	89738920	0	FALSE
+56.063TGAPQYGSYGTAPVNLNIK+56.063	tr|A0A0B4J203|A0A0B4J203_HUMAN;sp|Q6UN15|FIP1_HUMAN;sp|Q6UN15-3|FIP1_HUMAN;sp|Q6UN15-4|FIP1_HUMAN;sp|Q6UN15-5|FIP1_HUMAN	1.92938e+06	816588	728183	0	1.10492e+06	403895	0	FALSE
+56.063STSAPQMSPGSSDNQSSSPQPAQQK+56.063	tr|F8W726|F8W726_HUMAN;sp|Q14157|UBP2L_HUMAN;sp|Q14157-1|UBP2L_HUMAN;sp|Q14157-3|UBP2L_HUMAN;sp|Q14157-4|UBP2L_HUMAN;sp|Q14157-5|UBP2L_HUMAN	13387348	7.22522e+06	1.0227e+06	7.16068e+06	1.23088e+06	2.56253e+06	0	FALSE
+56.063AEEYEFLTPVEEAPK+56.063	tr|J3QQX2|J3QQX2_HUMAN;tr|J3KTF8|J3KTF8_HUMAN;tr|J3KRE2|J3KRE2_HUMAN;sp|P52565|GDIR1_HUMAN	27776558	13954772	1.88938e+06	10685399	5530721	2.47361e+06	0	FALSE
+56.063SQEATEAAPSC+57.021VGDM+15.995ADTPR	tr|K7EJL9|K7EJL9_HUMAN;tr|K7ER14|K7ER14_HUMAN;sp|Q9UHD8|SEPT9_HUMAN;sp|Q9UHD8-2|SEPT9_HUMAN;sp|Q9UHD8-3|SEPT9_HUMAN;sp|Q9UHD8-5|SEPT9_HUMAN;sp|Q9UHD8-7|SEPT9_HUMAN	4.6186e+06	2.15852e+06	288117	2.70672e+06	473123	1.00089e+06	0	FALSE
+56.063ASAGPQPLLVQSC+57.021K+56.063	sp|Q9Y490|TLN1_HUMAN	9133672	7533017	6.79015e+06	3.48631e+06	1.47891e+06	1.90968e+06	0.00237389	FALSE
+56.063SSDASTAQPPESQPLPASQTPASNQPK+56.063	sp|P48634|PRC2A_HUMAN;sp|P48634-2|PRC2A_HUMAN;sp|P48634-3|PRC2A_HUMAN;sp|P48634-4|PRC2A_HUMAN	16941264	8.15574e+06	1.78145e+06	7850215	3.49784e+06	2.54048e+06	0	FALSE
+56.063QLYEEEIRELQSQISDTSVVLSMDNSR	tr|F8VUG2|F8VUG2_HUMAN;sp|P05787|K2C8_HUMAN;sp|P05787-2|K2C8_HUMAN	864795	383039	835157	0	0	2.01859e+06	0.00237389	FALSE
+56.063AALETDENLLLC+57.021APTGAGK+56.063	sp|O75643|U520_HUMAN;sp|O75643-2|U520_HUMAN	572676	360923	1101569	541487	805488	774886	0.00237389	FALSE
+56.063TK+56.063VHAELADVLTEAVVDSILAIK+56.063K+56.063	sp|P40227|TCPZ_HUMAN;sp|P40227-2|TCPZ_HUMAN	16367770	10613338	1.55596e+06	9692615	2800896	5.02037e+06	0	FALSE
+56.063VM+15.995TIPYQPM+15.995PASSPVIC+57.021AGGQDR	sp|Q15365|PCBP1_HUMAN	10925177	2.61624e+06	8058192	0	3918659	4.46104e+06	0	FALSE
+56.063GSTDNLMDDIERAVDDGVNTFK+56.063	sp|P50990|TCPQ_HUMAN;sp|P50990-2|TCPQ_HUMAN;sp|P50990-3|TCPQ_HUMAN	907476	948270	546156	356568	0	0	0.00237389	FALSE
+56.063LASPSGSTSSGLEVVAPEGTSAPGGGPGTLDDSATIC+57.021R	tr|M0R0K9|M0R0K9_HUMAN;sp|Q13263|TIF1B_HUMAN;sp|Q13263-2|TIF1B_HUMAN	12207529	6.72412e+06	2.7351e+06	6422876	1.45775e+06	2819064	0	FALSE
+56.063QQLSAEELDAQLDAYNAR	tr|E9PB61|E9PB61_HUMAN;sp|Q86V81|THOC4_HUMAN	17053446	7994336	6695589	3.5658e+06	2.03229e+06	3.33185e+06	0	FALSE
+56.063TVTAAGAENIQQK+56.063	sp|Q29RF7|PDS5A_HUMAN	4.05141e+06	1.67594e+06	3.8012e+06	6896923	5573269	5317214	0.00237389	FALSE
+56.063ENVNATENC+57.021ISAVGK+56.063	tr|H0Y8C6|H0Y8C6_HUMAN;sp|O00410|IPO5_HUMAN;sp|O00410-2|IPO5_HUMAN;sp|O00410-3|IPO5_HUMAN	8947983	3309076	1.40069e+06	7147684	4.85437e+06	2395499	0.00237389	FALSE
+56.063AQGPAASAEEPK+56.063PVEAPAANSDQTVTVK+56.063E	sp|P80723|BASP1_HUMAN;sp|P80723-2|BASP1_HUMAN	11195758	3400599	0	4020035	0	4776389	0	FALSE
+56.063TK+56.063VHAELADVLTEAVVDSILAIK+56.063K+56.063	sp|P40227|TCPZ_HUMAN;sp|P40227-2|TCPZ_HUMAN	6.61682e+06	4.0515e+06	1.09638e+06	4041246	1.5072e+06	2.32797e+06	0	FALSE
+56.063SQEATEAAPSC+57.021VGDMADTPR	tr|K7EJL9|K7EJL9_HUMAN;tr|K7ER14|K7ER14_HUMAN;sp|Q9UHD8|SEPT9_HUMAN;sp|Q9UHD8-2|SEPT9_HUMAN;sp|Q9UHD8-3|SEPT9_HUMAN;sp|Q9UHD8-5|SEPT9_HUMAN;sp|Q9UHD8-7|SEPT9_HUMAN	4.3521e+06	1.49598e+06	1160351	2.65005e+06	2.61231e+06	1.7736e+06	0	FALSE
+56.063SK+56.063DDQVTVIGAGVTLHEALAAAELLK+56.063	tr|A0A0B4J1R6|A0A0B4J1R6_HUMAN;sp|P29401|TKT_HUMAN;sp|P29401-2|TKT_HUMAN	860090	1.01137e+06	0	663803	487498	457037	0.00237389	FALSE
+56.063LAQQQAAAAAAAAAAASQQGSAK+56.063	tr|A0A1B0GUU2|A0A1B0GUU2_HUMAN;tr|A0A0D9SF63|A0A0D9SF63_HUMAN;tr|F8W9D8|F8W9D8_HUMAN;tr|C9IYU9|C9IYU9_HUMAN;tr|C9JLJ1|C9JLJ1_HUMAN;tr|C9JBN1|C9JBN1_HUMAN;tr|C9JCK0|C9JCK0_HUMAN;tr|A0A0D9SF25|A0A0D9SF25_HUMAN;sp|Q9BZK7|TBL1R_HUMAN	8863457	5050461	0	4.92395e+06	3.95971e+06	2.24934e+06	0	FALSE
+56.063GVVPLAGTDGETTTQGLDGLSER	tr|J3QKP5|J3QKP5_HUMAN;tr|K7EKH5|K7EKH5_HUMAN;tr|A8MVZ9|A8MVZ9_HUMAN;tr|C9J8F3|C9J8F3_HUMAN;tr|J3KSV6|J3KSV6_HUMAN;sp|P09972|ALDOC_HUMAN	9281517	4828724	1.2486e+06	6628647	0	4.02346e+06	0	FALSE
+56.063ANLPQSFQVDTSK+56.063	tr|Q60FE5|Q60FE5_HUMAN;tr|A0A087WWY3|A0A087WWY3_HUMAN;sp|P21333|FLNA_HUMAN;sp|P21333-2|FLNA_HUMAN	6.08846e+06	2.61122e+06	1.45363e+06	3802856	1240398	1.94214e+06	0	FALSE
+56.063GLGTDEDTLIEILASR	tr|Q5T3N1|Q5T3N1_HUMAN;sp|P04083|ANXA1_HUMAN	703393	560701	320761	711356	37174.3	347343	0	FALSE
+56.063DNSTMGYMMAK+56.063	sp|P08238|HS90B_HUMAN;sp|Q58FF7|H90B3_HUMAN	1.37753e+06	645452	538295	1.00673e+06	430253	540796	0.00237389	FALSE
+56.063IPSAVGYQPTLATDMGTMQER	tr|F8W0P7|F8W0P7_HUMAN;tr|F8W079|F8W079_HUMAN;tr|H0YH81|H0YH81_HUMAN;tr|H0YI37|H0YI37_HUMAN;sp|P06576|ATPB_HUMAN	5.07914e+06	1.94278e+06	0	3089534	438142	1.97801e+06	0	FALSE
+56.063MDSTANEVEAVK+56.063	tr|H7BZ94|H7BZ94_HUMAN;tr|I3L0S0|I3L0S0_HUMAN;tr|H0Y3Z3|H0Y3Z3_HUMAN;sp|P07237|PDIA1_HUMAN	18058448	8.18698e+06	6772878	1.87983e+06	810600	604542	0.00237389	FALSE
+56.063LVQDVANNTNEEAGDGTTTATVLAR	tr|E7EXB4|E7EXB4_HUMAN;tr|C9JL25|C9JL25_HUMAN;tr|E7ESH4|E7ESH4_HUMAN;sp|P10809|CH60_HUMAN;sp|P10809-2|CH60_HUMAN	38440800	19753914	3.47264e+06	20615258	3.99521e+06	11608320	0	FALSE
+56.063ASMQQQQQLASAR	tr|A0A087X1B7|A0A087X1B7_HUMAN;tr|X6R700|X6R700_HUMAN;sp|Q9Y3Y2|CHTOP_HUMAN;sp|Q9Y3Y2-3|CHTOP_HUMAN;sp|Q9Y3Y2-4|CHTOP_HUMAN	1.87312e+06	462677	102969	743232	40031.6	372394	0	FALSE
+56.063IPSAVGYQPTLATDM+15.995GTMQER	tr|F8W0P7|F8W0P7_HUMAN;tr|F8W079|F8W079_HUMAN;tr|H0YH81|H0YH81_HUMAN;tr|H0YI37|H0YI37_HUMAN;sp|P06576|ATPB_HUMAN	9850703	6288660	840003	3.60966e+06	1.21529e+06	3.23243e+06	0	FALSE
+56.063TPVTDPATGAVK+56.063	sp|P49748|ACADV_HUMAN;sp|P49748-2|ACADV_HUMAN;sp|P49748-3|ACADV_HUMAN	11095744	4846962	620869	6.09415e+06	942057	3.9082e+06	0.00145402	FALSE
+56.063GISLNPEQWSQLK+56.063EQISDIDDAVR	sp|P53999|TCP4_HUMAN	141299	92570.5	0	175740	0	111549	0	FALSE
+56.063SELPLDPLPVPTEEGNPLLK+56.063	tr|M0QXM4|M0QXM4_HUMAN;sp|Q15758|AAAT_HUMAN;sp|Q15758-2|AAAT_HUMAN;sp|Q15758-3|AAAT_HUMAN	246476	95453.1	0	276115	0	120185	0.000399521	FALSE
+56.063QVMVVPVGPTC+57.021DEYAQK+56.063	sp|P26639|SYTC_HUMAN;sp|P26639-2|SYTC_HUMAN	7.37054e+06	3.23234e+06	173266	4.22032e+06	2.50468e+06	2.4588e+06	0	FALSE
+56.063VIVVGNPANTNC+57.021LTASK+56.063	tr|B9A041|B9A041_HUMAN;tr|C9JF79|C9JF79_HUMAN;tr|C9JRL4|C9JRL4_HUMAN;sp|P40925|MDHC_HUMAN;sp|P40925-2|MDHC_HUMAN;sp|P40925-3|MDHC_HUMAN	16252755	8578983	597270	10056243	1662617	2.64135e+06	0	FALSE
+56.063GSYGDLGGPIITTQVTIPK+56.063	tr|Q5T6W2|Q5T6W2_HUMAN;tr|S4R359|S4R359_HUMAN;sp|P61978|HNRPK_HUMAN;sp|P61978-2|HNRPK_HUMAN;sp|P61978-3|HNRPK_HUMAN	10362493	5.02386e+06	228818	2.00196e+06	575371	3643148	0.00237389	FALSE
+56.063VPADTEVVC+57.021APPTAYIDFAR	sp|P60174|TPIS_HUMAN;sp|P60174-1|TPIS_HUMAN	54441240	29702860	3.46193e+06	30571900	5.21136e+06	12717210	0	FALSE
+56.063NFGEEVDDESLK+56.063ELFSQFGK+56.063	tr|B1ANR0|B1ANR0_HUMAN;tr|H0Y5F5|H0Y5F5_HUMAN;tr|H0YCC8|H0YCC8_HUMAN;sp|Q13310|PABP4_HUMAN;sp|Q13310-2|PABP4_HUMAN;sp|Q13310-3|PABP4_HUMAN	617097	724807	165717	397841	95992.8	145810	0.00237389	FALSE
+56.063LPPNTNDEVDEDPTGNK+56.063	sp|Q15393|SF3B3_HUMAN;sp|Q15393-3|SF3B3_HUMAN	40475512	19089164	1.09218e+06	20703056	3.54318e+06	11426496	0	FALSE
+56.063NAVITVPAYFNDSQR	sp|P38646|GRP75_HUMAN	11156629	24266744	8577843	7.7977e+06	13481585	4227707	0	FALSE
+56.063LGLPPLTPEQQEALQK+56.063	tr|A0A0J9YXJ8|A0A0J9YXJ8_HUMAN;tr|E9PQ56|E9PQ56_HUMAN;tr|A0A0J9YWM1|A0A0J9YWM1_HUMAN;tr|H0YEM1|H0YEM1_HUMAN;tr|A0A0J9YVR6|A0A0J9YVR6_HUMAN;tr|A0A0J9YXX5|A0A0J9YXX5_HUMAN;tr|A0A0J9YYL3|A0A0J9YYL3_HUMAN;tr|A0A0J9YVP6|A0A0J9YVP6_HUMAN;tr|E9PL19|E9PL19_HUMAN;tr|E9PN18|E9PN18_HUMAN;tr|E9PMU7|E9PMU7_HUMAN;sp|Q9UHX1|PUF60_HUMAN;sp|Q9UHX1-2|PUF60_HUMAN;sp|Q9UHX1-3|PUF60_HUMAN;sp|Q9UHX1-4|PUF60_HUMAN;sp|Q…	31791702	14995174	1465362	16282951	3743360	14274305	0.00237389	FALSE
+56.063ALIVVPYAEGVIPDEAK+56.063	tr|Q5T760|Q5T760_HUMAN;sp|Q05519|SRS11_HUMAN;sp|Q05519-2|SRS11_HUMAN	312842	212571	50386.6	151264	102456	59398.3	0.00237389	FALSE
+56.063TLEPIC+57.021DADPSALAK+56.063	tr|A0A087X0H9|A0A087X0H9_HUMAN;sp|Q5T8P6|RBM26_HUMAN;sp|Q5T8P6-2|RBM26_HUMAN;sp|Q5T8P6-3|RBM26_HUMAN;sp|Q5T8P6-6|RBM26_HUMAN	3.25376e+06	1.93664e+06	1330101	4.14876e+06	0	0	0	FALSE
+56.063ATENDIYNFFSPLNPVR	tr|H0YB39|H0YB39_HUMAN;tr|E9PCY7|E9PCY7_HUMAN;tr|G8JLB6|G8JLB6_HUMAN;tr|H0YBD7|H0YBD7_HUMAN;tr|H0YBG7|H0YBG7_HUMAN;sp|P52597|HNRPF_HUMAN;sp|P31943|HNRH1_HUMAN	1.38259e+06	812402	0	304024	372813	446208	0.00237389	FALSE
+56.063AAPPPGQSQAQSQGQPVPTAPAR	tr|C9JYI7|C9JYI7_HUMAN;sp|Q6STE5|SMRD3_HUMAN;sp|Q6STE5-2|SMRD3_HUMAN	3.13653e+06	2.96847e+06	0	2.97099e+06	388751	1.01938e+06	0.00237389	FALSE
+56.063IATTTASAATAAAIGATPR	tr|H0YFY6|H0YFY6_HUMAN;tr|A0A087WY61|A0A087WY61_HUMAN;sp|Q14980|NUMA1_HUMAN;sp|Q14980-2|NUMA1_HUMAN;sp|Q14980-5|NUMA1_HUMAN	4.37727e+06	2.47344e+06	442587	2722275	1.15762e+06	822288	0	FALSE
+56.063AGVAAPATQVAQVTLQSVQR	tr|H0YDN1|H0YDN1_HUMAN;tr|E9PMV1|E9PMV1_HUMAN;sp|Q15149|PLEC_HUMAN;sp|Q15149-2|PLEC_HUMAN;sp|Q15149-3|PLEC_HUMAN;sp|Q15149-4|PLEC_HUMAN;sp|Q15149-5|PLEC_HUMAN;sp|Q15149-6|PLEC_HUMAN;sp|Q15149-7|PLEC_HUMAN;sp|Q15149-8|PLEC_HUMAN;sp|Q15149-9|PLEC_HUMAN	6768117	1.56348e+06	330880	1.49518e+06	1.43565e+06	2.65995e+06	0.00237389	FALSE
+56.063NQVAMNPTNTVFDAK+56.063	tr|E9PN25|E9PN25_HUMAN;tr|E9PKE3|E9PKE3_HUMAN;tr|E9PNE6|E9PNE6_HUMAN;tr|E9PQQ4|E9PQQ4_HUMAN;tr|E9PLF4|E9PLF4_HUMAN;tr|E9PPY6|E9PPY6_HUMAN;tr|E9PK54|E9PK54_HUMAN;tr|E9PQK7|E9PQK7_HUMAN;sp|P11142|HSP7C_HUMAN;sp|P11142-2|HSP7C_HUMAN	14255858	10947009	2834308	11611232	3.96235e+06	6.86126e+06	0	FALSE
+56.063NPDDITQEEYGEFYK+56.063	sp|P08238|HS90B_HUMAN	8645261	4380917	1.85163e+06	5.8152e+06	1.26142e+06	2660022	0.00237389	FALSE
+56.063YGK+56.063DATNVGDEGGFAPNILENK+56.063EGLELLK+56.063	tr|A0A2R8Y6G6|A0A2R8Y6G6_HUMAN;sp|P06733|ENOA_HUMAN;sp|P06733-2|ENOA_HUMAN	3.76749e+06	2.61885e+06	1.70079e+06	956187	0	3.2079e+06	0.00237389	FALSE
+56.063TK+56.063VHAELADVLTEAVVDSILAIK+56.063K+56.063	sp|P40227|TCPZ_HUMAN;sp|P40227-2|TCPZ_HUMAN	16475401	10896831	1.19397e+06	10120498	2.81986e+06	5060797	0	FALSE
+56.063TASISSSPSEGTPTVGSYGC+57.021TPQSLPK+56.063	sp|Q6PKG0|LARP1_HUMAN;sp|Q6PKG0-3|LARP1_HUMAN	18449536	12170091	4.5088e+06	11354729	7246097	8947290	0	FALSE
+56.063DAVSNTTNQLESK+56.063	sp|Q86UP2|KTN1_HUMAN;sp|Q86UP2-2|KTN1_HUMAN;sp|Q86UP2-3|KTN1_HUMAN;sp|Q86UP2-4|KTN1_HUMAN	8077994	2.7296e+06	534179	3.79126e+06	448582	2268567	0	FALSE
+56.063AAEGVSAADMAK+56.063	sp|Q9NW13|RBM28_HUMAN;sp|Q9NW13-2|RBM28_HUMAN	1.92781e+06	706296	560893	1304307	719423	836305	0.00145402	FALSE
+56.063AAAYSAQVQPVDGATR	tr|A0A3B3IRR6|A0A3B3IRR6_HUMAN;tr|A0A3B3ITA3|A0A3B3ITA3_HUMAN;tr|A0A3B3IT54|A0A3B3IT54_HUMAN;sp|Q9H7E9|CH033_HUMAN;sp|Q9H7E9-2|CH033_HUMAN	7593399	3.81992e+06	0	3562997	548175	1.47801e+06	0	FALSE
+56.063SPYTVTVGQAC+57.021NPSAC+57.021R	tr|Q60FE5|Q60FE5_HUMAN;tr|F8WE98|F8WE98_HUMAN;tr|A0A087WWY3|A0A087WWY3_HUMAN;sp|P21333|FLNA_HUMAN;sp|P21333-2|FLNA_HUMAN	990474	638132	219089	649803	224227	169437	0.000399521	FALSE
+56.063IK+56.063WGDAGAEYVVESTGVFTTMEK+56.063	tr|E7EUT5|E7EUT5_HUMAN;sp|P04406|G3P_HUMAN;sp|P04406-2|G3P_HUMAN	1.59327e+06	747426	0	639756	0	215062	0.00237389	FALSE
+56.063VTEAPC+57.021YPGAPSTEASGQTGPQEPTSARA	sp|P40222|TXLNA_HUMAN	26055088	12793612	9533403	12039676	3.38561e+06	5.63496e+06	0	FALSE
+56.063QQPPLAQPSASPYPEAVELQR	tr|Q05BE5|Q05BE5_HUMAN;tr|I3L0M5|I3L0M5_HUMAN;sp|Q9H6R0|DHX33_HUMAN	10705695	2.52191e+06	895329	5719660	261987	3.30718e+06	0	FALSE
+56.063SVPTSTVFYPSDGVATEK+56.063	tr|A0A0B4J1R6|A0A0B4J1R6_HUMAN;sp|P29401|TKT_HUMAN;sp|P29401-2|TKT_HUMAN	129218968	64388968	5.13671e+06	61533032	11105995	27937962	0	FALSE
+56.063FISDK+56.063DASIVGFFDDSFSEAHSEFLK+56.063	sp|P30101|PDIA3_HUMAN	640863	460668	466345	302458	183972	184109	0.00237389	FALSE
+56.063LVSTATTAPPSTAPSGPGSVQK+56.063	tr|J3KR72|J3KR72_HUMAN;sp|P49848|TAF6_HUMAN;sp|P49848-2|TAF6_HUMAN;sp|P49848-3|TAF6_HUMAN;sp|P49848-4|TAF6_HUMAN	6855631	4.10365e+06	1.39169e+06	4.43848e+06	2.26765e+06	2.8482e+06	0	FALSE
+56.063ETTDTDTADQVIASFK+56.063	tr|H7C144|H7C144_HUMAN;tr|F5GXS2|F5GXS2_HUMAN;sp|O43707|ACTN4_HUMAN;sp|O43707-2|ACTN4_HUMAN;sp|O43707-3|ACTN4_HUMAN	12810524	11616710	1.29051e+06	4.64402e+06	1.93445e+06	2.7682e+06	0	FALSE
+56.063AAAASAAEAGIATTGTEDSDDALLK+56.063	tr|H0Y3Y9|H0Y3Y9_HUMAN;sp|P55036|PSMD4_HUMAN	28919038	11182294	1.88721e+06	11878352	3781524	4597463	0	FALSE
+56.063LC+57.021C+57.021PATAPQEAPAPEGR	tr|M0QXZ5|M0QXZ5_HUMAN;sp|Q96B54|ZN428_HUMAN	6542848	3.10794e+06	117735	3.63013e+06	678589	1.03622e+06	0	FALSE
+56.063NSNPALNDNLEK+56.063	sp|O00299|CLIC1_HUMAN	6064150	2.37826e+06	266642	3079808	369599	816757	0.00237389	FALSE
+56.063QQLAQYQQQQSQASAPSTSR	sp|Q15007|FL2D_HUMAN	2.34378e+06	2.17626e+06	23859.1	1.62185e+06	175147	513125	0	FALSE
+56.063TTEEQVQASTPC+57.021PR	sp|Q14137|BOP1_HUMAN	4.17657e+06	2.42151e+06	295608	2359269	477622	919260	0	FALSE
+56.063AMGIM+15.995NSFVNDIFER	tr|U3KQK0|U3KQK0_HUMAN;sp|Q99877|H2B1N_HUMAN;sp|P23527|H2B1O_HUMAN;sp|P57053|H2BFS_HUMAN;sp|P62807|H2B1C_HUMAN;sp|P58876|H2B1D_HUMAN;sp|Q5QNW6|H2B2F_HUMAN;sp|Q5QNW6-2|H2B2F_HUMAN;sp|P06899|H2B1J_HUMAN;sp|O60814|H2B1K_HUMAN;sp|Q16778|H2B2E_HUMAN;sp|Q93079|H2B1H_HUMAN;sp|Q8N257|H2B3B_HUMAN;sp|P33778|H2B1B_HUMAN;sp|Q99880|H2B1L_HUMAN;sp|Q99879|H2B1M_HUMAN	338887	151089	149972	162862	68396.3	47155.8	0	FALSE
+56.063ALPFWNEEIVPQIK+56.063	sp|P18669|PGAM1_HUMAN;sp|P15259|PGAM2_HUMAN;sp|Q8N0Y7|PGAM4_HUMAN	77774.2	63668.7	0	22656.1	0	173836	0	FALSE
+56.063LASPSGSTSSGLEVVAPEGTSAPGGGPGTLDDSATIC+57.021R	tr|M0R0K9|M0R0K9_HUMAN;sp|Q13263|TIF1B_HUMAN;sp|Q13263-2|TIF1B_HUMAN	11888703	6.81288e+06	2.75555e+06	7.10544e+06	647082	4.26337e+06	0	FALSE
+56.063ESEPAPASVTALTDAR	tr|E9PMQ6|E9PMQ6_HUMAN;sp|Q00613|HSF1_HUMAN;sp|Q00613-2|HSF1_HUMAN	9588665	7633047	0	3.76242e+06	1.95886e+06	2.1765e+06	0	FALSE
+56.063FGLALAVAGGVVNSALYNVDAGHR	tr|E7ESE2|E7ESE2_HUMAN;tr|C9JW96|C9JW96_HUMAN;tr|E9PCW0|E9PCW0_HUMAN;tr|D6RBK0|D6RBK0_HUMAN;tr|C9JZ20|C9JZ20_HUMAN;sp|P35232|PHB_HUMAN;sp|P35232-2|PHB_HUMAN	4.02391e+06	2.42916e+06	320398	2.95311e+06	331565	1.32221e+06	0	FALSE
+56.063TYADYESVNEC+57.021MEGVC+57.021K+56.063	tr|G3V279|G3V279_HUMAN;sp|P84090|ERH_HUMAN	7.58817e+06	3.20892e+06	0	4381418	2.11636e+06	3.66462e+06	0.00237389	FALSE
+56.063GGSVLVTC+57.021STSC+57.021DQPK+56.063	tr|K7EKL8|K7EKL8_HUMAN;sp|P05362|ICAM1_HUMAN	10284707	4604758	105074	7064377	1.23555e+06	1.68798e+06	0.00237389	FALSE
+56.063NQVAMNPTNTVFDAK+56.063	tr|E9PN25|E9PN25_HUMAN;tr|E9PKE3|E9PKE3_HUMAN;tr|E9PNE6|E9PNE6_HUMAN;tr|E9PQQ4|E9PQQ4_HUMAN;tr|E9PLF4|E9PLF4_HUMAN;tr|E9PPY6|E9PPY6_HUMAN;tr|E9PK54|E9PK54_HUMAN;tr|E9PQK7|E9PQK7_HUMAN;sp|P11142|HSP7C_HUMAN;sp|P11142-2|HSP7C_HUMAN	35439520	16458713	1.00259e+06	17322312	1.30411e+06	6.92302e+06	0	FALSE
+56.063SSTETC+57.021YSAIPK+56.063	tr|E7EN95|E7EN95_HUMAN;tr|A0A0A0MT44|A0A0A0MT44_HUMAN;sp|O75369|FLNB_HUMAN;sp|O75369-2|FLNB_HUMAN;sp|O75369-3|FLNB_HUMAN;sp|O75369-7|FLNB_HUMAN;sp|O75369-6|FLNB_HUMAN;sp|O75369-8|FLNB_HUMAN;sp|O75369-9|FLNB_HUMAN	10613318	7.98985e+06	2.08575e+06	12960672	4395609	4.62282e+06	0	FALSE
+56.063IIYGGSVTGATC+57.021K+56.063	sp|P60174|TPIS_HUMAN;sp|P60174-1|TPIS_HUMAN;sp|P60174-4|TPIS_HUMAN	18665472	8708835	1657006	9659605	1.11854e+06	5209844	0	FALSE
+56.063IK+56.063WGDAGAEYVVESTGVFTTMEK+56.063	tr|E7EUT5|E7EUT5_HUMAN;sp|P04406|G3P_HUMAN;sp|P04406-2|G3P_HUMAN	1.86631e+06	1.1271e+06	0	762086	0	326773	0.00237389	FALSE
+56.063SIQFVDWC+57.021PTGFK+56.063	sp|P68363|TBA1B_HUMAN;sp|P68363-2|TBA1B_HUMAN;sp|P68366|TBA4A_HUMAN;sp|P68366-2|TBA4A_HUMAN	1.27068e+06	340903	490618	565705	0	57810.3	0.00237389	FALSE
+56.063ELAQQVQQVADDYGK+56.063	tr|A0A1X7SBZ2|A0A1X7SBZ2_HUMAN;tr|A0A1W2PQ51|A0A1W2PQ51_HUMAN;sp|Q92841|DDX17_HUMAN;sp|Q92841-1|DDX17_HUMAN;sp|Q92841-2|DDX17_HUMAN;sp|Q92841-3|DDX17_HUMAN	7010763	3688627	1345519	1.81758e+06	182347	1.39613e+06	0.00237389	FALSE
+56.063C+57.021ELLYEGPPDDEAAMGIK+56.063	sp|P13639|EF2_HUMAN	3.13785e+06	2.22719e+06	2.37624e+06	2.88651e+06	754216	2.31981e+06	0.00237389	FALSE
+56.063TTPSYVAFTDTER	tr|A0A0G2JIW1|A0A0G2JIW1_HUMAN;tr|E9PN25|E9PN25_HUMAN;tr|E9PKE3|E9PKE3_HUMAN;tr|E9PNE6|E9PNE6_HUMAN;tr|E9PQQ4|E9PQQ4_HUMAN;tr|E9PI65|E9PI65_HUMAN;tr|E9PLF4|E9PLF4_HUMAN;tr|E9PPY6|E9PPY6_HUMAN;tr|E9PK54|E9PK54_HUMAN;tr|E9PQK7|E9PQK7_HUMAN;tr|Q53FA3|Q53FA3_HUMAN;sp|P0DMV9|HS71B_HUMAN;sp|P54652|HSP72_HUMAN;sp|P17066|HSP76_HUMAN;sp|P11142|HSP7C_HUMAN;sp|P11142-2|HSP7C_HUMAN;sp|P34931|HS71L_HUMAN;sp|P…	11079593	7967109	18031196	15557082	7178278	3.75699e+06	0	FALSE
+56.063TEPTAQQNLALQLAEK+56.063	sp|Q99613|EIF3C_HUMAN;sp|Q99613-2|EIF3C_HUMAN;sp|B5ME19|EIFCL_HUMAN	30676634	14567860	794636	15717820	2.6279e+06	7576509	0	FALSE
+56.063EAAGTTAAAGTGGATEQPPR	tr|E9PQI8|E9PQI8_HUMAN;sp|O43290|SNUT1_HUMAN	6479507	3.42125e+06	420559	3.50967e+06	655368	1.90197e+06	0.000399521	FALSE
+56.063VNQIGSVTESIQAC+57.021K+56.063	sp|P13929|ENOB_HUMAN;sp|P13929-2|ENOB_HUMAN;sp|P13929-3|ENOB_HUMAN	154769408	62590412	7170544	85685120	14022011	29244628	0	FALSE
+56.063VNQIGSVTESLQAC+57.021K+56.063	tr|A0A2R8Y6G6|A0A2R8Y6G6_HUMAN;sp|P06733|ENOA_HUMAN;sp|P06733-2|ENOA_HUMAN	154769408	62590412	7170544	85685120	14022011	29244628	0	FALSE
+56.063DQDLEPGAPSMGAK+56.063	sp|P07814|SYEP_HUMAN	4281777	2.53014e+06	410033	2.05784e+06	440328	254941	0.00237389	FALSE
+56.063TDYNASVSVPDSSGPER	tr|Q5T6W2|Q5T6W2_HUMAN;sp|P61978|HNRPK_HUMAN;sp|P61978-2|HNRPK_HUMAN;sp|P61978-3|HNRPK_HUMAN	12143973	7237535	1.64331e+06	8.22388e+06	1.82902e+06	3.94743e+06	0	FALSE
+56.063AAAPAPEEEM+15.995DEC+57.021EQALAAEPK+56.063	sp|P26641|EF1G_HUMAN;sp|P26641-2|EF1G_HUMAN	10359582	12902632	0	5607203	0	2.34356e+06	0.00237389	FALSE
+56.063AIVAIENPADVSVISSR	tr|F8WD59|F8WD59_HUMAN;tr|A0A0C4DG17|A0A0C4DG17_HUMAN;tr|C9J9K3|C9J9K3_HUMAN;sp|P08865|RSSA_HUMAN	881692	521001	220989	376080	385134	134272	0	FALSE
+56.063EAPATQASSTTQLTDTQVLAAENK+56.063	tr|Q5H909|Q5H909_HUMAN;sp|Q9UNF1|MAGD2_HUMAN;sp|Q9UNF1-2|MAGD2_HUMAN	44331124	22243602	1.51127e+06	18768330	4903580	5779537	0	FALSE
+56.063NQVAM+15.995NPTNTVFDAK+56.063	tr|E9PN25|E9PN25_HUMAN;tr|E9PKE3|E9PKE3_HUMAN;tr|E9PNE6|E9PNE6_HUMAN;tr|E9PQQ4|E9PQQ4_HUMAN;tr|E9PLF4|E9PLF4_HUMAN;tr|E9PPY6|E9PPY6_HUMAN;tr|E9PK54|E9PK54_HUMAN;tr|E9PQK7|E9PQK7_HUMAN;sp|P11142|HSP7C_HUMAN;sp|P11142-2|HSP7C_HUMAN	21343564	10391403	1.73666e+06	11182416	2.58423e+06	6717310	0	FALSE
+56.063GAGTGGLGLAVEGPSEAK+56.063	tr|Q60FE5|Q60FE5_HUMAN;tr|A0A087WWY3|A0A087WWY3_HUMAN;sp|P21333|FLNA_HUMAN;sp|P21333-2|FLNA_HUMAN	4.22074e+06	2.03824e+06	2.59348e+06	2.23932e+06	0	852328	0.00237389	FALSE
+56.063LYGSAGPPPTGEEDTAEK+56.063DEL	sp|P11021|BIP_HUMAN	182021280	96262904	10752111	94666984	18081750	53417424	0	FALSE
+56.063TIQNSSVSPTSSSSSSSSTGETQTQSSSR	sp|Q7Z417|NUFP2_HUMAN	1.04698e+06	325798	160736	200712	105393	55785.7	0	FALSE
+56.063NQVAMNPTNTVFDAK+56.063	tr|E9PN25|E9PN25_HUMAN;tr|E9PKE3|E9PKE3_HUMAN;tr|E9PNE6|E9PNE6_HUMAN;tr|E9PQQ4|E9PQQ4_HUMAN;tr|E9PLF4|E9PLF4_HUMAN;tr|E9PPY6|E9PPY6_HUMAN;tr|E9PK54|E9PK54_HUMAN;tr|E9PQK7|E9PQK7_HUMAN;sp|P11142|HSP7C_HUMAN;sp|P11142-2|HSP7C_HUMAN	35487964	16695440	1.16723e+06	17636728	1.29145e+06	7346326	0	FALSE
+56.063NQVAM+15.995NPTNTVFDAK+56.063	tr|E9PN25|E9PN25_HUMAN;tr|E9PKE3|E9PKE3_HUMAN;tr|E9PNE6|E9PNE6_HUMAN;tr|E9PQQ4|E9PQQ4_HUMAN;tr|E9PLF4|E9PLF4_HUMAN;tr|E9PPY6|E9PPY6_HUMAN;tr|E9PK54|E9PK54_HUMAN;tr|E9PQK7|E9PQK7_HUMAN;sp|P11142|HSP7C_HUMAN;sp|P11142-2|HSP7C_HUMAN	9274454	5.23242e+06	5.2333e+06	5028470	2.82839e+06	2.24412e+06	0	FALSE
+56.063DALNQATSQVESK+56.063	tr|A0A087WVV2|A0A087WVV2_HUMAN;tr|F8W7S5|F8W7S5_HUMAN;sp|Q9P2E9|RRBP1_HUMAN;sp|Q9P2E9-3|RRBP1_HUMAN	5.31711e+06	2.24618e+06	429500	2366700	6.21998e+06	4684221	0	FALSE
+56.063TK+56.063VHAELADVLTEAVVDSILAIK+56.063K+56.063	sp|P40227|TCPZ_HUMAN;sp|P40227-2|TCPZ_HUMAN	16353968	10867677	1.02858e+06	10509846	851974	4655172	0	FALSE
+56.063LLATEQEDAAVAK+56.063	tr|A0A087WVV2|A0A087WVV2_HUMAN;tr|F8W7S5|F8W7S5_HUMAN;sp|Q9P2E9|RRBP1_HUMAN;sp|Q9P2E9-3|RRBP1_HUMAN	19348824	7118569	31532358	8.11353e+06	6.98905e+06	2.93587e+06	0.00237389	FALSE
+56.063ESTGAQVQVAGDM+15.995LPNSTER	tr|E9PFP8|E9PFP8_HUMAN;tr|F8VZX2|F8VZX2_HUMAN;tr|F8VXH9|F8VXH9_HUMAN;tr|F8W0G4|F8W0G4_HUMAN;tr|J3QT27|J3QT27_HUMAN;tr|H3BRU6|H3BRU6_HUMAN;sp|Q15366|PCBP2_HUMAN;sp|Q15366-2|PCBP2_HUMAN;sp|Q15366-3|PCBP2_HUMAN;sp|Q15366-4|PCBP2_HUMAN;sp|Q15366-5|PCBP2_HUMAN;sp|Q15366-6|PCBP2_HUMAN;sp|Q15366-7|PCBP2_HUMAN;sp|Q15366-8|PCBP2_HUMAN;sp|Q15365|PCBP1_HUMAN;sp|P57721|PCBP3_HUMAN;sp|P57721-2|PCBP3_HUMAN;sp|…	73633352	36254516	5506129	37771728	9274571	19734478	0.00237389	FALSE
+56.063DAAASASTPAQAPTSDSPVAEDASR	tr|H3BRW3|H3BRW3_HUMAN;tr|H3BRD2|H3BRD2_HUMAN;sp|P55789|ALR_HUMAN	8260494	4.8709e+06	367351	2.8002e+06	254630	1.1482e+06	0.000399521	FALSE
+56.063AAPTAASDQPDSAATTEK+56.063	sp|Q9BRP8|PYM1_HUMAN;sp|Q9BRP8-2|PYM1_HUMAN	29730774	14918751	1.39624e+06	15862274	3.07461e+06	5.9845e+06	0	FALSE
+56.063TSVQTEDDQLIAGQSAR	tr|G3XAM7|G3XAM7_HUMAN;tr|A0A0A0MTJ6|A0A0A0MTJ6_HUMAN;tr|A0A0A0MRI5|A0A0A0MRI5_HUMAN;sp|P35221|CTNA1_HUMAN;sp|P35221-2|CTNA1_HUMAN;sp|P35221-3|CTNA1_HUMAN;sp|P26232|CTNA2_HUMAN;sp|P26232-2|CTNA2_HUMAN;sp|P26232-3|CTNA2_HUMAN;sp|P26232-4|CTNA2_HUMAN;sp|P26232-5|CTNA2_HUMAN;sp|P26232-6|CTNA2_HUMAN	1.93303e+06	1246224	703794	1.4016e+06	439326	1000682	0	FALSE
+56.063VIVVGNPANTNC+57.021LTASK+56.063	tr|B9A041|B9A041_HUMAN;tr|C9JF79|C9JF79_HUMAN;tr|C9JRL4|C9JRL4_HUMAN;sp|P40925|MDHC_HUMAN;sp|P40925-2|MDHC_HUMAN;sp|P40925-3|MDHC_HUMAN	20982350	10247410	882412	12517737	2.22803e+06	5.38835e+06	0	FALSE
+56.063VVAPTISSPVC+57.021QEQLVEAGR	sp|Q9Y490|TLN1_HUMAN	18863652	8742997	1.31984e+06	8754554	1.91291e+06	3.57568e+06	0	FALSE
+56.063APLATGEDDDDEVPDLVENFDEASK+56.063NEAN	sp|P20290|BTF3_HUMAN;sp|P20290-2|BTF3_HUMAN	728680	192393	0	573786	0	430638	0.00217391	FALSE
+56.063TIAEC+57.021LADELINAAK+56.063	tr|M0R0R2|M0R0R2_HUMAN;tr|M0R0F0|M0R0F0_HUMAN;tr|M0QZN2|M0QZN2_HUMAN;sp|P46782|RS5_HUMAN	1.02428e+06	449340	254574	343815	384637	135770	0	FALSE
+56.063GNPTVEVDLFTSK+56.063	tr|K7ERS8|K7ERS8_HUMAN;tr|K7EM90|K7EM90_HUMAN;tr|A0A2R8Y798|A0A2R8Y798_HUMAN;tr|A0A2R8YEG5|A0A2R8YEG5_HUMAN;tr|A0A2R8Y879|A0A2R8Y879_HUMAN;tr|A0A2R8Y6G6|A0A2R8Y6G6_HUMAN;tr|A0A2R8YEM5|A0A2R8YEM5_HUMAN;sp|P06733|ENOA_HUMAN	7.98471e+06	1.75061e+06	1.19478e+06	2680199	2.92709e+06	0	0	FALSE
+56.063ASYVAPLTAQPATYR	sp|Q96PK6|RBM14_HUMAN	2403072	1.65569e+06	354686	1.18266e+06	564066	725599	0	FALSE
+56.063GC+57.021ITIIGGGDTATC+57.021C+57.021AK+56.063	sp|P00558|PGK1_HUMAN;sp|P00558-2|PGK1_HUMAN	16830100	7.49346e+06	2.51096e+06	11765906	4.01285e+06	4006769	0	FALSE
+56.063ITAQENDMEVELPAAANSR	tr|Q5JR91|Q5JR91_HUMAN;tr|Q5JR89|Q5JR89_HUMAN;sp|Q99661|KIF2C_HUMAN;sp|Q99661-2|KIF2C_HUMAN	2.46778e+06	2679324	2.4136e+06	626332	2.35728e+06	425536	0.00237389	FALSE
+56.063SVPTSTVFYPSDGVATEK+56.063	tr|A0A0B4J1R6|A0A0B4J1R6_HUMAN;sp|P29401|TKT_HUMAN;sp|P29401-2|TKT_HUMAN	122704920	61100732	6.07033e+06	56059936	10611138	29449416	0	FALSE
+56.063SEDPDQQYLILNTAR	sp|Q96QK1|VPS35_HUMAN	4943443	1.9926e+06	0	895413	4.16113e+06	0	0.00237389	FALSE
+56.063LQQQAALSPTTAPAVSSVSK+56.063	tr|A0A0U1RRM1|A0A0U1RRM1_HUMAN;tr|A0A0U1RR30|A0A0U1RR30_HUMAN;sp|Q8WXI9|P66B_HUMAN	11716413	5.8661e+06	829378	9692031	1.97997e+06	2.75423e+06	0	FALSE
+56.063IDQYQGADAVGLEEK+56.063	tr|K7ER96|K7ER96_HUMAN;tr|K7EML9|K7EML9_HUMAN;sp|O43396|TXNL1_HUMAN	9366676	5021599	1.77739e+06	2.95786e+06	919655	3.23118e+06	0	FALSE
+56.063EK+56.063PYFPIPEEYTFIQNVPLEDR	tr|A0A1W2PQL0|A0A1W2PQL0_HUMAN;tr|A0A1W2PP34|A0A1W2PP34_HUMAN;tr|Q5RI18|Q5RI18_HUMAN;tr|A0A1W2PQ74|A0A1W2PQ74_HUMAN;tr|A0A1W2PPH7|A0A1W2PPH7_HUMAN;tr|A0A1W2PP35|A0A1W2PP35_HUMAN;tr|A0A1W2PPL4|A0A1W2PPL4_HUMAN;tr|A0A1W2PPS1|A0A1W2PPS1_HUMAN;tr|A0A1X7SBS1|A0A1X7SBS1_HUMAN;tr|A0A1W2PRZ7|A0A1W2PRZ7_HUMAN;sp|Q00839|HNRPU_HUMAN;sp|Q00839-2|HNRPU_HUMAN	834610	721509	0	568697	0	0	0.00237389	FALSE
+56.063TIAQGNLSNTDVQAAK+56.063	tr|H3BRG4|H3BRG4_HUMAN;sp|P22695|QCR2_HUMAN	11588145	5981831	108276	1.34437e+06	491073	0	0	FALSE
+56.063LC+57.021EAIC+57.021PAQAITIEAEPR	tr|E9PKH6|E9PKH6_HUMAN;tr|E9PPW7|E9PPW7_HUMAN;sp|O00217|NDUS8_HUMAN	2.07818e+06	1.14785e+06	604486	1.44925e+06	0	1680239	0	FALSE
+56.063INSGGK+56.063LPNFGFVVFDDSEPVQK+56.063	sp|Q13283|G3BP1_HUMAN	631600	1.37637e+06	441352	551164	0	0	0.00237389	FALSE
+56.063TK+56.063VHAELADVLTEAVVDSILAIK+56.063K+56.063	sp|P40227|TCPZ_HUMAN;sp|P40227-2|TCPZ_HUMAN	6.78207e+06	4.12376e+06	1.10704e+06	3.99181e+06	1.49728e+06	2368057	0	FALSE
+56.063EGTLTQVPLAPPPPGAPPSPAPAR	sp|P48634|PRC2A_HUMAN	16805382	7660973	2231285	7781962	2795149	4477821	0.000399521	FALSE
+56.063SSSSVTTSETQPC+57.021TPSSSDYSDLQR	tr|K7EM16|K7EM16_HUMAN;sp|P50552|VASP_HUMAN	3845608	3.13731e+06	0	3298101	792227	3.05227e+06	0	FALSE
+56.063VIAQQVQLQQQQEQVR	sp|Q01664|TFAP4_HUMAN	6160641	1598826	1.20052e+06	2136491	73403.9	1.51461e+06	0.00237389	FALSE
+56.063GFAFVTFDDHDSVDK+56.063IVIQK+56.063	tr|F8W6I7|F8W6I7_HUMAN;tr|F8VTQ5|F8VTQ5_HUMAN;tr|A0A2R8Y4L2|A0A2R8Y4L2_HUMAN;tr|F8VZ49|F8VZ49_HUMAN;tr|H0YH80|H0YH80_HUMAN;sp|Q32P51|RA1L2_HUMAN;sp|P09651|ROA1_HUMAN;sp|P09651-2|ROA1_HUMAN;sp|P09651-3|ROA1_HUMAN	417354	392094	191146	94030.9	205699	113356	0.000399521	FALSE
+56.063EADGSETPEPFAAEAK+56.063	sp|Q7KZF4|SND1_HUMAN	6.52651e+06	6.37203e+06	588875	7.49727e+06	1.78759e+06	1.93817e+06	0	FALSE
+56.063TGIEQGSDAGYLC+57.021ESQK+56.063	tr|H0YFD6|H0YFD6_HUMAN;tr|A0A2R8Y4F5|A0A2R8Y4F5_HUMAN;tr|A0A2R8YG21|A0A2R8YG21_HUMAN;sp|P40939|ECHA_HUMAN	1669873	688924	0	568837	0	0	0	FALSE
+56.063QQVPSGESAILDR	sp|P09874|PARP1_HUMAN	7557358	4495237	2.80051e+06	5.52333e+06	3.28066e+06	2863912	0.000399521	FALSE
+56.063TTETQVFVATPQK+56.063	tr|A0A2R8Y6I1|A0A2R8Y6I1_HUMAN;tr|A0A2R8Y5P7|A0A2R8Y5P7_HUMAN;tr|D6RB22|D6RB22_HUMAN;tr|A0A2R8Y3N3|A0A2R8Y3N3_HUMAN;tr|B4DQ67|B4DQ67_HUMAN;sp|P49590|SYHM_HUMAN;sp|P49590-2|SYHM_HUMAN	4.17179e+06	5.40388e+06	27385730	2346707	0	698910	0.00237389	FALSE
+56.063EC+57.021VLPGGETAGDMGK+56.063	tr|A0A2R8Y7S8|A0A2R8Y7S8_HUMAN;tr|A0A2R8YFH0|A0A2R8YFH0_HUMAN;tr|A0A2R8YG02|A0A2R8YG02_HUMAN;tr|E9PHA6|E9PHA6_HUMAN;tr|A0A2R8Y6P0|A0A2R8Y6P0_HUMAN;sp|P43246|MSH2_HUMAN;sp|P43246-2|MSH2_HUMAN	6.55861e+06	6254550	3412983	2.55146e+06	367656	891752	0	FALSE
+56.063TFVNITPAEVGVLVGK+56.063DR	tr|I3L3D5|I3L3D5_HUMAN;sp|P07737|PROF1_HUMAN	7126711	3688568	411780	3.35304e+06	440533	955531	0	FALSE
+56.063VLEQLTGQTPVFSK+56.063	tr|Q5VVC8|Q5VVC8_HUMAN;sp|P62913|RL11_HUMAN;sp|P62913-2|RL11_HUMAN	7.46767e+06	3.843e+06	1.48921e+06	3.42304e+06	9970434	6859520	0.00237389	FALSE
+56.063IIEDQQESLNK+56.063	sp|P05455|LA_HUMAN	1.82925e+06	1.03052e+06	244651	703532	0	187798	0.00237389	FALSE
+56.063AATAAADFTAK+56.063	sp|Q9Y3F4|STRAP_HUMAN;sp|Q9Y3F4-2|STRAP_HUMAN	6.15638e+06	1586103	49152.5	3.39227e+06	2.108e+06	2.90094e+06	0	FALSE
+56.063YAAPEQNNDPQQSK+56.063	tr|A0A0A0MTB8|A0A0A0MTB8_HUMAN;sp|Q8NI36|WDR36_HUMAN	3154968	1.55845e+06	104336	1.73353e+06	235641	709184	0	FALSE
+56.063AIPADSPTDQEPK+56.063	tr|H7C3Z2|H7C3Z2_HUMAN;sp|Q9Y5Y0|FLVC1_HUMAN;sp|Q9Y5Y0-2|FLVC1_HUMAN	1.39821e+06	407508	389895	684458	164757	296456	0	FALSE
+56.063YISPDQLADLYK+56.063	tr|A0A2R8Y6G6|A0A2R8Y6G6_HUMAN;sp|P06733|ENOA_HUMAN;sp|P06733-2|ENOA_HUMAN	6.20811e+06	2.36997e+06	323191	1.84134e+06	330687	208403	0.00237389	FALSE
+56.063NAEQAATQLK+56.063	sp|Q86UP2|KTN1_HUMAN;sp|Q86UP2-2|KTN1_HUMAN;sp|Q86UP2-3|KTN1_HUMAN;sp|Q86UP2-4|KTN1_HUMAN	3.6448e+06	1.71381e+06	335518	2.29075e+06	445529	1755050	0	FALSE
+56.063ATQLQGDEEPSAPPTSTQAQQK+56.063	tr|A0A140T947|A0A140T947_HUMAN;sp|O60231|DHX16_HUMAN	28495626	16344710	1.22416e+06	13884675	3.8634e+06	5.75542e+06	0	FALSE
+56.063VGVEVPDVNIEGPEGK+56.063	sp|Q09666|AHNK_HUMAN	4.64416e+06	2.65694e+06	2185049	1.79086e+06	181348	681824	0.00237389	FALSE
+56.063VLEEANQAINPK+56.063	tr|A0A1X7SBZ2|A0A1X7SBZ2_HUMAN;tr|A0A1W2PQ51|A0A1W2PQ51_HUMAN;sp|Q92841|DDX17_HUMAN;sp|Q92841-1|DDX17_HUMAN;sp|Q92841-2|DDX17_HUMAN;sp|Q92841-3|DDX17_HUMAN	12115246	6630775	477519	6.93733e+06	1.60363e+06	4291828	0.00237389	FALSE
+56.063SVTEQGAELSNEER	tr|E9PD24|E9PD24_HUMAN;tr|E7ESK7|E7ESK7_HUMAN;tr|E5RGE1|E5RGE1_HUMAN;tr|E5RIR4|E5RIR4_HUMAN;tr|E7EVZ2|E7EVZ2_HUMAN;tr|E7EX29|E7EX29_HUMAN;sp|P63104|1433Z_HUMAN	3.71482e+06	8655150	0	1.83952e+06	0	4.15906e+06	0.000399521	FALSE
+56.063ETLPAEQDLTTK+56.063	tr|F5GX11|F5GX11_HUMAN;sp|P25786|PSA1_HUMAN;sp|P25786-2|PSA1_HUMAN	15888792	8783462	432869	8635380	1.29274e+06	6119394	0	FALSE
+56.063QQVVLENAAK+56.063	sp|Q01780|EXOSX_HUMAN;sp|Q01780-2|EXOSX_HUMAN	8572272	4495340	1.6779e+06	4642976	747790	2.02569e+06	0	FALSE
+56.063IYDPQEGAVVVLPADSQQR	sp|Q9NXF1|TEX10_HUMAN;sp|Q9NXF1-2|TEX10_HUMAN	5566029	3.51978e+06	1381733	1.5592e+06	1.06007e+06	2.04654e+06	0	FALSE
+56.063QAYTGNNSSQIQAAM+15.995K+56.063	sp|O94826|TOM70_HUMAN	2.61921e+06	942644	222219	1.34819e+06	267416	745087	0	FALSE
+56.063VELVPPTPAEIPR	tr|A0A3B3ITX4|A0A3B3ITX4_HUMAN;tr|E9PN17|E9PN17_HUMAN;sp|O75964|ATP5L_HUMAN	4.85469e+06	2.69578e+06	1.40968e+06	2.51203e+06	1.68207e+06	2.06237e+06	0.000399521	FALSE
+56.063VFQSSTSQEQVYNDC+57.021AK+56.063	sp|P33176|KINH_HUMAN	2236736	1.65146e+06	1.87627e+06	1.4112e+06	200262	618167	0.00237389	FALSE
+56.063TLTAVHDAILEDLVFPSEIVGK+56.063	tr|A0A2R8Y623|A0A2R8Y623_HUMAN;tr|B5MCP9|B5MCP9_HUMAN;sp|P62081|RS7_HUMAN	557413	553008	0	432893	633402	0	0.00237389	FALSE
+56.063STVVPVPYEK+56.063	sp|P78347|GTF2I_HUMAN;sp|P78347-2|GTF2I_HUMAN;sp|P78347-3|GTF2I_HUMAN;sp|P78347-4|GTF2I_HUMAN;sp|P78347-5|GTF2I_HUMAN	12402343	5.84672e+06	6.00609e+06	6750561	2.94101e+06	5110148	0.00237389	FALSE
+56.063ASIQAASAESSGQK+56.063	tr|E9PRB3|E9PRB3_HUMAN;tr|J3KP30|J3KP30_HUMAN;sp|Q5QJE6|TDIF2_HUMAN	1.01696e+06	323299	28048	244284	10534	190663	0	FALSE
+56.063FLIPNASQAESK+56.063	tr|E7ESK7|E7ESK7_HUMAN;tr|E7EX29|E7EX29_HUMAN;tr|B0AZS6|B0AZS6_HUMAN;sp|P63104|1433Z_HUMAN;sp|P63104-2|1433Z_HUMAN	1.2765e+06	1.47234e+06	251453	834325	629070	762448	0.00237389	FALSE
+56.063TVSLGAGAK+56.063DELHIVEAEAM+15.995NYEGSPIK+56.063VTLATLK+56.063	sp|P06748|NPM_HUMAN;sp|P06748-2|NPM_HUMAN;sp|P06748-3|NPM_HUMAN	246315	155584	110024	119377	0	71423	0.00145402	FALSE
+56.063LGSTEVASNVPK+56.063	tr|S4R3V3|S4R3V3_HUMAN;sp|Q9Y5A9|YTHD2_HUMAN;sp|Q9Y5A9-2|YTHD2_HUMAN	3.03924e+06	1.91366e+06	1.06714e+06	1.15565e+06	182261	771309	0.00145402	FALSE
+56.063LTLYDIAHTPGVAADLSHIETK+56.063	sp|P40926|MDHM_HUMAN;sp|P40926-2|MDHM_HUMAN	261699	103865	211025	258851	232053	144529	0.00237389	FALSE
+56.063GC+57.021ITVIGGGDTATC+57.021C+57.021AK+56.063	sp|P07205|PGK2_HUMAN	0	21778620	8914057	45378800	22314750	9859852	0.00145402	FALSE
+56.063NQVAM+15.995NPTNTVFDAK+56.063	tr|E9PN25|E9PN25_HUMAN;tr|E9PKE3|E9PKE3_HUMAN;tr|E9PNE6|E9PNE6_HUMAN;tr|E9PQQ4|E9PQQ4_HUMAN;tr|E9PLF4|E9PLF4_HUMAN;tr|E9PPY6|E9PPY6_HUMAN;tr|E9PK54|E9PK54_HUMAN;tr|E9PQK7|E9PQK7_HUMAN;sp|P11142|HSP7C_HUMAN;sp|P11142-2|HSP7C_HUMAN	17577080	4.93909e+06	7.1487e+06	7.30197e+06	26467150	52392040	0	FALSE
+56.063STEPELIQVK+56.063	tr|M0QXM4|M0QXM4_HUMAN;sp|Q15758|AAAT_HUMAN;sp|Q15758-2|AAAT_HUMAN;sp|Q15758-3|AAAT_HUMAN	6.48659e+06	1.92342e+06	767813	1.57554e+06	854023	2.10828e+06	0.00145402	FALSE
+56.063TTNYSTVPQK+56.063	tr|A0A087WTC9|A0A087WTC9_HUMAN;tr|H0YJA2|H0YJA2_HUMAN;tr|G3V5I6|G3V5I6_HUMAN;tr|G3V256|G3V256_HUMAN;sp|Q6PJT7|ZC3HE_HUMAN;sp|Q6PJT7-2|ZC3HE_HUMAN;sp|Q6PJT7-3|ZC3HE_HUMAN;sp|Q6PJT7-4|ZC3HE_HUMAN;sp|Q6PJT7-5|ZC3HE_HUMAN;sp|Q6PJT7-9|ZC3HE_HUMAN;sp|Q6PJT7-10|ZC3HE_HUMAN;sp|Q6PJT7-11|ZC3HE_HUMAN	2.43772e+06	1.17609e+06	285183	1.46038e+06	163585	991935	0.00237389	FALSE
+56.063IENVVLVVPVK+56.063	tr|Q5T6H7|Q5T6H7_HUMAN;sp|Q9NQW7|XPP1_HUMAN;sp|Q9NQW7-2|XPP1_HUMAN;sp|Q9NQW7-3|XPP1_HUMAN;sp|Q9NQW7-4|XPP1_HUMAN	1.64043e+06	1385646	383502	1.06155e+06	593902	428226	0.00237389	FALSE
+56.063AGTGVDNVDLEAATR	tr|A0A286YFM8|A0A286YFM8_HUMAN;tr|A0A286YFA2|A0A286YFA2_HUMAN;tr|A0A286YFC8|A0A286YFC8_HUMAN;tr|A0A2C9F2M7|A0A2C9F2M7_HUMAN;tr|A0A286YF22|A0A286YF22_HUMAN;tr|A0A286YFL2|A0A286YFL2_HUMAN;tr|A0A286YER3|A0A286YER3_HUMAN;tr|A0A286YFB2|A0A286YFB2_HUMAN;sp|O43175|SERA_HUMAN	5.92552e+06	4.98079e+06	1254921	2.49618e+06	1879396	1.51712e+06	0.00237389	FALSE
+56.063K+56.063PLVIIAEDVDGEALSTLVLNR	sp|P10809|CH60_HUMAN	3.29335e+06	1.36747e+06	959055	1378104	418821	744436	0	FALSE
+56.063TPTC+57.021QSSTDC+57.021SPYAR	sp|O95235|KI20A_HUMAN;sp|O95235-2|KI20A_HUMAN	637459	0	603108	1.36282e+06	0	279749	0.00237389	FALSE
+56.063IQEAGTEVVK+56.063	tr|G3XAL0|G3XAL0_HUMAN;sp|P40926|MDHM_HUMAN;sp|P40926-2|MDHM_HUMAN	72408760	35536700	4.04892e+06	36824616	7447226	22959200	0	FALSE
+56.063DLEK+56.063PFLLPVEAVYSVPGR	sp|P49411|EFTU_HUMAN	202637	53198.1	0	44510.7	62859.1	90109.4	0.00237389	FALSE
+56.063TLTLVDTGIGM+15.995TK+56.063	sp|P08238|HS90B_HUMAN	2.50254e+06	1.44609e+06	125514	1.78802e+06	0	989901	0.00237389	FALSE
+56.063TLTIVDTGIGM+15.995TK+56.063	tr|G3V2J8|G3V2J8_HUMAN;sp|P07900|HS90A_HUMAN;sp|P07900-2|HS90A_HUMAN;sp|Q58FG1|HS904_HUMAN	2.50254e+06	1.44609e+06	125514	1.78802e+06	0	989901	0.00237389	FALSE
+56.063ADHQPLTEASYVNLPTIALC+57.021NTDSPLR	tr|A0A0C4DG17|A0A0C4DG17_HUMAN;tr|C9J9K3|C9J9K3_HUMAN;sp|P08865|RSSA_HUMAN	1.7989e+06	323658	1.2079e+06	569388	0	0	0.000399521	FALSE
+56.063AMGIM+15.995NSFVNDIFER	tr|U3KQK0|U3KQK0_HUMAN;sp|Q99877|H2B1N_HUMAN;sp|P23527|H2B1O_HUMAN;sp|P57053|H2BFS_HUMAN;sp|P62807|H2B1C_HUMAN;sp|P58876|H2B1D_HUMAN;sp|Q5QNW6|H2B2F_HUMAN;sp|Q5QNW6-2|H2B2F_HUMAN;sp|P06899|H2B1J_HUMAN;sp|O60814|H2B1K_HUMAN;sp|Q16778|H2B2E_HUMAN;sp|Q93079|H2B1H_HUMAN;sp|Q8N257|H2B3B_HUMAN;sp|P33778|H2B1B_HUMAN;sp|Q99880|H2B1L_HUMAN;sp|Q99879|H2B1M_HUMAN	978637	269195	587815	283114	373520	101475	0	FALSE
+56.063SSPAAFINPPIGTVTPALK+56.063	tr|F8WCX5|F8WCX5_HUMAN;tr|Q8WUT1|Q8WUT1_HUMAN;tr|F8WEE2|F8WEE2_HUMAN;tr|F6VRR5|F6VRR5_HUMAN;tr|Q6R954|Q6R954_HUMAN;sp|Q9BY77|PDIP3_HUMAN;sp|Q9BY77-2|PDIP3_HUMAN	2.81689e+06	1.72105e+06	0	1.47421e+06	0	1.39034e+06	0.00145402	FALSE
+56.063NTDQASM+15.995PDNTAAQK+56.063	sp|P35749|MYH11_HUMAN;sp|P35749-2|MYH11_HUMAN;sp|P35749-3|MYH11_HUMAN;sp|P35749-4|MYH11_HUMAN;sp|P35579|MYH9_HUMAN;sp|P35579-2|MYH9_HUMAN	556681	284769	119385	324770	60788	76875.6	0	FALSE
+56.063TQLAVC+57.021QQR	tr|H0YFG2|H0YFG2_HUMAN;sp|Q02790|FKBP4_HUMAN	4258261	1.55117e+06	613917	1.5791e+06	475183	404322	0	FALSE
+56.063TEPTAQQNLALQLAEK+56.063	sp|Q99613|EIF3C_HUMAN;sp|Q99613-2|EIF3C_HUMAN;sp|B5ME19|EIFCL_HUMAN	34353300	19144016	1915847	20391964	909891	10365871	0	FALSE
+56.063TTQVPQFILDDFIQNDR	sp|Q08211|DHX9_HUMAN	139136	52742.3	55738.8	11395.2	60236.5	69869.5	0.000399521	FALSE
+56.063SQEATEAAPSC+57.021VGDMADTPR	tr|K7EJL9|K7EJL9_HUMAN;tr|K7ER14|K7ER14_HUMAN;sp|Q9UHD8|SEPT9_HUMAN;sp|Q9UHD8-2|SEPT9_HUMAN;sp|Q9UHD8-3|SEPT9_HUMAN;sp|Q9UHD8-5|SEPT9_HUMAN;sp|Q9UHD8-7|SEPT9_HUMAN	1.43715e+06	0	715645	1.54625e+06	0	547615	0.000399521	FALSE
+56.063AQEPESGLSEETQVK+56.063	sp|P78527|PRKDC_HUMAN;sp|P78527-2|PRKDC_HUMAN	22741792	11177289	1.42327e+06	10233581	1.77785e+06	4.29996e+06	0	FALSE
+56.063SSGASVTTQPTEFK+56.063	tr|F6VRR5|F6VRR5_HUMAN;sp|Q9BY77|PDIP3_HUMAN;sp|Q9BY77-2|PDIP3_HUMAN	14456928	9889174	1762197	13735525	651260	6.71293e+06	0	FALSE
+56.063IQAAASTPTNATAASDANTGDRGQTNNAASASASNST	sp|P49841|GSK3B_HUMAN;sp|P49841-2|GSK3B_HUMAN	2.95488e+06	1.71417e+06	467603	1.50694e+06	353056	1.85808e+06	0.00237389	FALSE
+56.063GAEAANVTGPDGVPVEGSR	tr|A0A0D9SEI8|A0A0D9SEI8_HUMAN;sp|P16989|YBOX3_HUMAN;sp|P16989-2|YBOX3_HUMAN;sp|P16989-3|YBOX3_HUMAN	7.1115e+06	2.17019e+06	483581	1.67044e+06	576604	1.99951e+06	0.00237389	FALSE
+56.063AM+15.995GIMNSFVNDIFER	tr|U3KQK0|U3KQK0_HUMAN;sp|Q99877|H2B1N_HUMAN;sp|P23527|H2B1O_HUMAN;sp|P57053|H2BFS_HUMAN;sp|P62807|H2B1C_HUMAN;sp|P58876|H2B1D_HUMAN;sp|Q5QNW6|H2B2F_HUMAN;sp|Q5QNW6-2|H2B2F_HUMAN;sp|P06899|H2B1J_HUMAN;sp|O60814|H2B1K_HUMAN;sp|Q16778|H2B2E_HUMAN;sp|Q93079|H2B1H_HUMAN;sp|Q8N257|H2B3B_HUMAN;sp|P33778|H2B1B_HUMAN;sp|Q99880|H2B1L_HUMAN;sp|Q99879|H2B1M_HUMAN	165133	18625	43939.4	106322	69352.1	27133.6	0.00237389	FALSE
+56.063STLQTLPEIVAK+56.063	sp|O95202|LETM1_HUMAN	3845961	3647973	1298414	2564876	766110	1.69694e+06	0.00237389	FALSE
+56.063VQNATLAVANITNADSATR	tr|F8VSL7|F8VSL7_HUMAN;sp|P27105|STOM_HUMAN	5.85625e+06	5.12071e+06	0	3.31122e+06	614983	4128124	0.00237389	FALSE
+56.063QNQTTSAVSTPASSETSK+56.063	sp|P49792|RBP2_HUMAN	2.01018e+06	659234	246293	712903	177411	656127	0	FALSE
+56.063GDATVSYEDPPTAK+56.063	tr|A0A0D9SFL3|A0A0D9SFL3_HUMAN;tr|H7BY36|H7BY36_HUMAN;tr|B0QYK0|B0QYK0_HUMAN;tr|C9JGE3|C9JGE3_HUMAN;sp|Q01844|EWS_HUMAN;sp|Q01844-2|EWS_HUMAN;sp|Q01844-3|EWS_HUMAN;sp|Q01844-5|EWS_HUMAN;sp|Q01844-6|EWS_HUMAN	4.47222e+06	1.93273e+06	1157818	2.31787e+06	0	1.44212e+06	0	FALSE
+56.063TISTSDPAEVLVK+56.063	tr|E5RJU9|E5RJU9_HUMAN;sp|Q86UE4|LYRIC_HUMAN	9906501	4.5392e+06	1.73594e+06	4.67476e+06	796841	2306770	0.00145402	FALSE
+56.063VAVEYLDPSPEVQK+56.063	tr|J3QT28|J3QT28_HUMAN;sp|O43684|BUB3_HUMAN;sp|O43684-2|BUB3_HUMAN	8.03634e+06	4.15038e+06	524756	4317703	2.05448e+06	3132238	0	FALSE
+56.063LNDGSQITYEK+56.063	sp|O95831|AIFM1_HUMAN;sp|O95831-3|AIFM1_HUMAN;sp|O95831-4|AIFM1_HUMAN;sp|O95831-6|AIFM1_HUMAN	4629115	2.48003e+06	1.77938e+06	1.87841e+06	659497	1.21163e+06	0.00237389	FALSE
+56.063LLDPEDVDVPQPDEK+56.063	tr|H0YDN1|H0YDN1_HUMAN;tr|E9PMV1|E9PMV1_HUMAN;sp|Q15149|PLEC_HUMAN;sp|Q15149-2|PLEC_HUMAN;sp|Q15149-3|PLEC_HUMAN;sp|Q15149-4|PLEC_HUMAN;sp|Q15149-5|PLEC_HUMAN;sp|Q15149-6|PLEC_HUMAN;sp|Q15149-7|PLEC_HUMAN;sp|Q15149-8|PLEC_HUMAN;sp|Q15149-9|PLEC_HUMAN	12769809	8.25792e+06	1.66945e+06	6429834	2068690	6318185	0.00237389	FALSE
+56.063C+57.021VANNQVETLEK+56.063	sp|P42704|LPPRC_HUMAN	3.24046e+06	1.58006e+06	395754	775069	0	469376	0.00237389	FALSE
+56.063NNEDISIIPPLFTVSVDHR	tr|A6NLM8|A6NLM8_HUMAN;sp|P51571|SSRD_HUMAN	721713	642967	0	428877	291461	0	0.00145402	FALSE
+56.063ITLPVDFVTADK+56.063FDENAK+56.063	sp|P00558|PGK1_HUMAN;sp|P00558-2|PGK1_HUMAN	2.91927e+06	1.13411e+06	1.11276e+06	1.5317e+06	620230	1.57755e+06	0	FALSE
+56.063IVEQPTVSVTEPK+56.063	sp|Q15054|DPOD3_HUMAN;sp|Q15054-2|DPOD3_HUMAN;sp|Q15054-3|DPOD3_HUMAN	5918967	3754990	0	4146087	886131	10061688	0	FALSE
+56.063IINEPTAAAIAYGLDK+56.063	tr|E9PKE3|E9PKE3_HUMAN;tr|E9PI65|E9PI65_HUMAN;tr|E9PLF4|E9PLF4_HUMAN;tr|E9PN89|E9PN89_HUMAN;tr|Q53FA3|Q53FA3_HUMAN;sp|P11021|BIP_HUMAN;sp|P54652|HSP72_HUMAN;sp|P11142|HSP7C_HUMAN;sp|P11142-2|HSP7C_HUMAN;sp|P34931|HS71L_HUMAN	4148073	3.48374e+06	1213587	2.95438e+06	621027	2234779	0.00145402	FALSE
+56.063VTADVINAAEK+56.063	tr|A0A286YFM8|A0A286YFM8_HUMAN;tr|A0A286YFA2|A0A286YFA2_HUMAN;tr|A0A286YF34|A0A286YF34_HUMAN;tr|A0A286YFC8|A0A286YFC8_HUMAN;tr|A0A2C9F2M7|A0A2C9F2M7_HUMAN;tr|A0A286YF22|A0A286YF22_HUMAN;tr|A0A286YFL2|A0A286YFL2_HUMAN;tr|A0A286YER3|A0A286YER3_HUMAN;tr|A0A286YFB2|A0A286YFB2_HUMAN;sp|O43175|SERA_HUMAN	17423110	5864639	1.15628e+06	10525525	1979320	5951366	0	FALSE
+56.063ATNESEDEIPQLVPIGK+56.063	tr|J3QSV6|J3QSV6_HUMAN;sp|O76021|RL1D1_HUMAN;sp|O76021-2|RL1D1_HUMAN	26694284	11910201	1.62955e+06	13488561	1.61886e+06	4783165	0	FALSE
+56.063TPC+57.021NAGTFSQPEK+56.063	tr|J3QSX4|J3QSX4_HUMAN;tr|J3QT28|J3QT28_HUMAN;sp|O43684|BUB3_HUMAN;sp|O43684-2|BUB3_HUMAN	3.96238e+06	3.45103e+06	346202	2.68103e+06	540654	1.35761e+06	0.00237389	FALSE
+56.063ESYSVYVYK+56.063	tr|U3KQK0|U3KQK0_HUMAN;sp|Q99877|H2B1N_HUMAN;sp|P57053|H2BFS_HUMAN;sp|P62807|H2B1C_HUMAN;sp|P58876|H2B1D_HUMAN;sp|Q5QNW6|H2B2F_HUMAN;sp|Q5QNW6-2|H2B2F_HUMAN;sp|O60814|H2B1K_HUMAN;sp|Q93079|H2B1H_HUMAN;sp|Q99880|H2B1L_HUMAN;sp|Q99879|H2B1M_HUMAN	4.26366e+06	7513641	7355984	13112342	13088750	12791007	0	FALSE
+56.063IQQLTALGAAQATAK+56.063A	tr|H3BPF6|H3BPF6_HUMAN;tr|H3BMQ1|H3BMQ1_HUMAN;sp|Q99471|PFD5_HUMAN;sp|Q99471-3|PFD5_HUMAN	8917471	3.18477e+06	471000	3.56372e+06	1.10279e+06	2.08575e+06	0	FALSE
+56.063ASATSVSSAGEQAAGDPEGR	tr|A0A2R8YFI4|A0A2R8YFI4_HUMAN;tr|V9GYZ0|V9GYZ0_HUMAN;sp|Q9BZ23|PANK2_HUMAN;sp|Q9BZ23-3|PANK2_HUMAN;sp|Q9BZ23-4|PANK2_HUMAN	2211604	91048.8	382957	0	505591	324120	0	FALSE
+56.063VPEVPTAPATDAAPK+56.063	tr|K7ERG1|K7ERG1_HUMAN;tr|K7EJ51|K7EJ51_HUMAN;sp|Q9UHD8|SEPT9_HUMAN;sp|Q9UHD8-2|SEPT9_HUMAN;sp|Q9UHD8-3|SEPT9_HUMAN;sp|Q9UHD8-5|SEPT9_HUMAN;sp|Q9UHD8-7|SEPT9_HUMAN	19269296	8609190	2491107	8229061	2.66383e+06	5.98183e+06	0	FALSE
+56.063QVVESAYEVIK+56.063	sp|P00338|LDHA_HUMAN;sp|P00338-3|LDHA_HUMAN;sp|P00338-4|LDHA_HUMAN	7082502	2428623	563169	5443584	2.55958e+06	3.03154e+06	0	FALSE
+56.063SVSLTGAPESVQK+56.063	tr|M0QXW7|M0QXW7_HUMAN;tr|M0R0I5|M0R0I5_HUMAN;tr|A0A087WTP3|A0A087WTP3_HUMAN;tr|M0QYH3|M0QYH3_HUMAN;sp|Q92945|FUBP2_HUMAN	10093763	5.39648e+06	3.31661e+06	8241803	1.2317e+06	4399682	0	FALSE
+56.063TAAANAAAGAAENAFRAP	sp|O14828|SCAM3_HUMAN;sp|O14828-2|SCAM3_HUMAN	1507253	1.23001e+06	632830	383362	597840	518192	0.00237389	FALSE
+56.063APQVVAEAAK+56.063	sp|O60832|DKC1_HUMAN	5.02194e+06	2.26805e+06	1.25285e+06	2435617	225616	952499	0.00237389	FALSE
+56.063LYGSAGPPPTGEEDTAEK+56.063DEL	sp|P11021|BIP_HUMAN	378863008	201976640	25697116	201102368	29262508	111090280	0	FALSE
+56.063QQAAYYAQTSPQGMPQHPPAPQGQ	sp|Q96AE4|FUBP1_HUMAN	26091988	16642499	2.94073e+06	17831356	3.00484e+06	5.838e+06	0	FALSE
+56.063GTSFDAAATSGGSASSEK+56.063	tr|H0YL12|H0YL12_HUMAN;tr|H0YKF0|H0YKF0_HUMAN;tr|H0YK49|H0YK49_HUMAN;tr|H0YNX6|H0YNX6_HUMAN;tr|H0YLU7|H0YLU7_HUMAN;sp|P13804|ETFA_HUMAN;sp|P13804-2|ETFA_HUMAN	2.31644e+06	1.45633e+06	895921	1.68123e+06	580062	882989	0.00237389	FALSE
+56.063TIAEC+57.021LADELINAAK+56.063	tr|M0R0R2|M0R0R2_HUMAN;tr|M0R0F0|M0R0F0_HUMAN;tr|M0QZN2|M0QZN2_HUMAN;sp|P46782|RS5_HUMAN	1.80854e+06	717640	898908	749515	331750	168987	0	FALSE
+56.063ADTQTYQPYNK+56.063	sp|P84090|ERH_HUMAN	2.18237e+06	832103	42553.4	1.00621e+06	286700	559782	0	FALSE
+56.063NSEPAGLETPEAK+56.063	tr|V9GYZ6|V9GYZ6_HUMAN;sp|P07814|SYEP_HUMAN	11779640	1.52503e+06	2.17722e+06	152655	137458	507684	0	FALSE
+56.063EDLVVAPAGITLK+56.063	tr|H0Y4R1|H0Y4R1_HUMAN;tr|E7ETK5|E7ETK5_HUMAN;sp|P12268|IMDH2_HUMAN	3.60602e+06	2085076	1.50314e+06	2.48476e+06	631816	1.40572e+06	0.00237389	FALSE
+56.063TSLAGDTSNSSSPASTGAK+56.063	tr|H0Y6T5|H0Y6T5_HUMAN;tr|H3BPE1|H3BPE1_HUMAN;tr|H0Y4F5|H0Y4F5_HUMAN;tr|H0Y390|H0Y390_HUMAN;tr|H0Y314|H0Y314_HUMAN;tr|H3BQK9|H3BQK9_HUMAN;sp|Q9UPN3|MACF1_HUMAN;sp|Q9UPN3-2|MACF1_HUMAN;sp|Q9UPN3-3|MACF1_HUMAN;sp|Q9UPN3-4|MACF1_HUMAN;sp|Q9UPN3-5|MACF1_HUMAN	1.1202e+06	822820	0	804259	0	0	0.00237389	FALSE
+56.063VELPGTAVPSVPEDAAPASR	tr|G3XAL9|G3XAL9_HUMAN;sp|P55011|S12A2_HUMAN;sp|P55011-3|S12A2_HUMAN	8313668	588905	9002576	86523	2.7351e+06	3.31526e+06	0.00237389	FALSE
+56.063TQTPPVEENVTQK+56.063	sp|Q6P1Q9|MET2B_HUMAN;sp|Q6P1Q9-2|MET2B_HUMAN	131415624	89477440	993517	26537.4	0	158384	0	FALSE
+56.063TALPAQSAATLPAR	tr|A0A087WUZ3|A0A087WUZ3_HUMAN;sp|Q01082|SPTB2_HUMAN	7452515	4.29102e+06	831526	4508381	1.75335e+06	3.90361e+06	0	FALSE
+56.063C+57.021SQAVYAAEK+56.063	tr|E9PS42|E9PS42_HUMAN;tr|E9PND2|E9PND2_HUMAN;tr|E9PP21|E9PP21_HUMAN;sp|P21291|CSRP1_HUMAN	3.03971e+06	1.01738e+06	470321	1.58885e+06	1.01503e+06	147705	0.00237389	FALSE
+56.063GSC+57.021YPC+57.021PETVDVK+56.063	sp|Q6ZNB6|NFXL1_HUMAN;sp|Q6ZNB6-2|NFXL1_HUMAN	2.44245e+06	3.60184e+06	6280155	3.75438e+06	1904278	3205212	0.00237389	FALSE
+56.063NC+57.021IAQTSAVVK+56.063	tr|C9JQ41|C9JQ41_HUMAN;tr|H7C525|H7C525_HUMAN;sp|Q4VC31|CCD58_HUMAN	8240688	3.01465e+06	0	4412322	1.01828e+06	2.82514e+06	0	FALSE
+56.063GGEIQPVSVK+56.063	tr|B8ZZL8|B8ZZL8_HUMAN;tr|B8ZZ54|B8ZZ54_HUMAN;sp|P61604|CH10_HUMAN	65921052	34147192	3.3296e+06	33988396	5904662	19345428	0	FALSE
+56.063NAAPPPSNTEAPPGETR	tr|G3V529|G3V529_HUMAN;tr|A0A1W2PRR2|A0A1W2PRR2_HUMAN;tr|F5GYL3|F5GYL3_HUMAN;sp|Q9GZR7|DDX24_HUMAN;sp|Q9GZR7-2|DDX24_HUMAN	4919032	2.82725e+06	482305	2.62395e+06	752795	1.32852e+06	0	FALSE
+56.063GALQNIIPASTGAAK+56.063	tr|E7EUT5|E7EUT5_HUMAN;sp|P04406|G3P_HUMAN;sp|P04406-2|G3P_HUMAN	69634152	36086728	3.71212e+06	46221964	9569711	21477816	0	FALSE
+56.063AIAELGIYPAVDPLDSTSR	tr|H0YH81|H0YH81_HUMAN;sp|P06576|ATPB_HUMAN	247323	293578	0	279031	0	0	0.00237389	FALSE
+56.063DNLTLWTSENQGDEGDAGEGEN	sp|P31946|1433B_HUMAN;sp|P31946-2|1433B_HUMAN	24611426	13461109	828832	12139466	1.82846e+06	6846244	0	FALSE
+56.063TYDPSGDSTLPTC+57.021SK+56.063	sp|Q9Y2X3|NOP58_HUMAN	9347737	6498449	1.58654e+06	10648597	6.57658e+06	3.47208e+06	0.000399521	FALSE
+56.063ADLINNLGTIAK+56.063	sp|P07900|HS90A_HUMAN;sp|P07900-2|HS90A_HUMAN;sp|Q14568|HS902_HUMAN;sp|P08238|HS90B_HUMAN;sp|Q58FF8|H90B2_HUMAN	7284183	1.86682e+06	334375	2.8194e+06	2.24558e+06	1963157	0.000399521	FALSE
+56.063TAATSVPAYEPLDSLDR	tr|A0A087WWP4|A0A087WWP4_HUMAN;sp|Q96T37|RBM15_HUMAN;sp|Q96T37-2|RBM15_HUMAN;sp|Q96T37-3|RBM15_HUMAN;sp|Q96T37-4|RBM15_HUMAN	4.66424e+06	3.71386e+06	4621692	1968874	1.49538e+06	1.37578e+06	0.00237389	FALSE
+56.063DSYVGDEAQSK+56.063	tr|G5E9R0|G5E9R0_HUMAN;tr|C9JZR7|C9JZR7_HUMAN;tr|A0A2R8YGF8|A0A2R8YGF8_HUMAN;tr|C9JUM1|C9JUM1_HUMAN;tr|K7EM38|K7EM38_HUMAN;tr|F8WB63|F8WB63_HUMAN;tr|I3L3R2|I3L3R2_HUMAN;tr|I3L1U9|I3L1U9_HUMAN;tr|I3L3I0|I3L3I0_HUMAN;tr|C9JFL5|C9JFL5_HUMAN;tr|E7EVS6|E7EVS6_HUMAN;tr|J3KT65|J3KT65_HUMAN;tr|F6QUT6|F6QUT6_HUMAN;tr|B8ZZJ2|B8ZZJ2_HUMAN;tr|A6NL76|A6NL76_HUMAN;tr|F6UVQ4|F6UVQ4_HUMAN;tr|A0A2R8Y793|A0A2R8Y79…	1.53104e+06	552800	457976	553855	317592	908866	0	FALSE
+56.063EAALPPVSPLK+56.063	tr|E9PGM1|E9PGM1_HUMAN;tr|E7EX73|E7EX73_HUMAN;tr|E7EUU4|E7EUU4_HUMAN;sp|Q04637|IF4G1_HUMAN;sp|Q04637-3|IF4G1_HUMAN;sp|Q04637-4|IF4G1_HUMAN;sp|Q04637-5|IF4G1_HUMAN;sp|Q04637-6|IF4G1_HUMAN;sp|Q04637-7|IF4G1_HUMAN;sp|Q04637-8|IF4G1_HUMAN;sp|Q04637-9|IF4G1_HUMAN	26708040	11538571	3.09231e+06	15595411	2.22371e+06	2.95377e+06	0	FALSE
+56.063GVM+15.995LAVDAVIAELK+56.063K+56.063	tr|E7EXB4|E7EXB4_HUMAN;tr|E7ESH4|E7ESH4_HUMAN;sp|P10809|CH60_HUMAN	1.05584e+06	631669	0	674744	0	18335	0.00237389	FALSE
+56.063IIYGGSVTGATC+57.021K+56.063	sp|P60174|TPIS_HUMAN;sp|P60174-1|TPIS_HUMAN;sp|P60174-4|TPIS_HUMAN	5376141	2657201	1.4406e+06	3152015	2.06035e+06	1.24186e+06	0.000789266	FALSE
+56.063EALPAPSDDATALMTDPK+56.063	tr|A0A2R8Y6B6|A0A2R8Y6B6_HUMAN;tr|A0A087WUQ6|A0A087WUQ6_HUMAN;sp|P07203|GPX1_HUMAN	8.12848e+06	4823729	1.05579e+06	5391856	1.36404e+06	2.78601e+06	0.00145402	FALSE
+56.063AFLADPSAFVAAAPVAAATTAAPAAAAAPAK+56.063	tr|F8VWS0|F8VWS0_HUMAN;tr|F8W1K8|F8W1K8_HUMAN;sp|P05388|RLA0_HUMAN;sp|P05388-2|RLA0_HUMAN	263997	228073	0	185733	0	100565	0.00237389	FALSE
+56.063QSVTYAC+57.021NK+56.063	tr|A0A2R8YDY3|A0A2R8YDY3_HUMAN;tr|B1AP13|B1AP13_HUMAN;tr|A0A2R8YEC5|A0A2R8YEC5_HUMAN;tr|H3BLV0|H3BLV0_HUMAN;tr|B1AP15|B1AP15_HUMAN;tr|H7BY55|H7BY55_HUMAN;sp|P08174|DAF_HUMAN;sp|P08174-2|DAF_HUMAN;sp|P08174-3|DAF_HUMAN;sp|P08174-4|DAF_HUMAN;sp|P08174-5|DAF_HUMAN;sp|P08174-6|DAF_HUMAN;sp|P08174-7|DAF_HUMAN	1.12571e+06	428119	109975	495489	213678	195463	0	FALSE
+56.063LSELQETSEQAQSK+56.063	tr|A0A0A0MT60|A0A0A0MT60_HUMAN;sp|Q5T1M5|FKB15_HUMAN;sp|Q5T1M5-2|FKB15_HUMAN	4.033e+06	3.17731e+06	873312	3.79564e+06	0	1394.55	0.00237389	FALSE
+56.063DLYEDELVPLFEK+56.063	tr|B4DT28|B4DT28_HUMAN;sp|O43390|HNRPR_HUMAN;sp|O43390-2|HNRPR_HUMAN;sp|O43390-3|HNRPR_HUMAN;sp|O43390-4|HNRPR_HUMAN	1.05174e+06	442367	1.00987e+06	573682	405143	0	0.00237389	FALSE
+56.063ETPAATEAPSSTPK+56.063	sp|P80723|BASP1_HUMAN;sp|P80723-2|BASP1_HUMAN	145471376	79021000	7.72288e+06	78674664	15272157	45946156	0	FALSE
+56.063FIPLSEPAPVPPIPNEQQLAR	tr|H7C3S9|H7C3S9_HUMAN;tr|E9PGT6|E9PGT6_HUMAN;sp|Q99627|CSN8_HUMAN;sp|Q99627-2|CSN8_HUMAN	643449	313629	64450.5	339142	233243	31194.1	0.00237389	FALSE
+56.063VTPPEGYEVVTVFPK+56.063	sp|O00151|PDLI1_HUMAN	4381883	7.01507e+06	1.83062e+06	2756838	692574	2.2177e+06	0.000399521	FALSE
+56.063YVEC+57.021SALTQK+56.063	sp|P60953|CDC42_HUMAN	10727411	12199860	5.03416e+06	8529207	5016375	8.07129e+06	0	FALSE
+56.063QQYESVAAK+56.063	tr|B0YJC4|B0YJC4_HUMAN;tr|B0YJC5|B0YJC5_HUMAN;sp|P08670|VIME_HUMAN	33054646	16982984	1.57725e+06	16856428	3.30463e+06	9144194	0	FALSE
+56.063ELPPDQAEYC+57.021IAR	tr|H9KV75|H9KV75_HUMAN;tr|H7C144|H7C144_HUMAN;tr|H0YJW3|H0YJW3_HUMAN;tr|F5GXS2|F5GXS2_HUMAN;sp|P12814|ACTN1_HUMAN;sp|P12814-2|ACTN1_HUMAN;sp|P12814-3|ACTN1_HUMAN;sp|P12814-4|ACTN1_HUMAN;sp|O43707|ACTN4_HUMAN;sp|O43707-2|ACTN4_HUMAN;sp|O43707-3|ACTN4_HUMAN	26104218	2144857	7764536	5.98707e+06	2.55242e+06	547058	0	FALSE
+56.063SETAPAAPAAPAPAEK+56.063	sp|P10412|H14_HUMAN	61413936	29837332	2845241	29643286	5783671	18879558	0	FALSE
+66.125SADGSAPAGEGEGVTLQR	sp|Q01650|LAT1_HUMAN	10770388	5.8169e+06	1.20447e+06	5.54484e+06	3.07568e+06	4202954	0	FALSE
+56.063DGGVQAC+57.021FSR	sp|P08754|GNAI3_HUMAN	3.29429e+06	1.46255e+06	856128	2.56749e+06	2496795	2.40783e+06	0.00145402	FALSE
+56.063TQDPSSPGTTPPQAR	sp|Q13112|CAF1B_HUMAN	793652	397241	30114.7	436224	50825.7	225297	0.00237389	FALSE
+56.063IINEPTAAAIAYGLDK+56.063K+56.063	tr|E9PKE3|E9PKE3_HUMAN;tr|E9PI65|E9PI65_HUMAN;tr|E9PN89|E9PN89_HUMAN;sp|P54652|HSP72_HUMAN;sp|P11142|HSP7C_HUMAN;sp|P11142-2|HSP7C_HUMAN	1.01851e+06	521255	0	0	0	304906	0.00237389	FALSE
+56.063TSAVPSPC+57.021GK+56.063	sp|P49748|ACADV_HUMAN;sp|P49748-2|ACADV_HUMAN;sp|P49748-3|ACADV_HUMAN	7.696e+06	3.93948e+06	960377	4.7169e+06	362239	2.5803e+06	0.00145402	FALSE
+56.063GEPPLPEEDLSK+56.063	tr|B3KS98|B3KS98_HUMAN;tr|A0A087WZK9|A0A087WZK9_HUMAN;sp|O15372|EIF3H_HUMAN	19645444	15826460	35394776	57691420	40952948	19471746	0	FALSE
+56.063QQAAYYAQTSPQGM+15.995PQHPPAPQGQ	sp|Q96AE4|FUBP1_HUMAN	12018492	6.61042e+06	679485	8535021	1.07929e+06	3374297	0	FALSE
+56.063AVFVDLEPTVIDEVRTGTYR	tr|F8VRK0|F8VRK0_HUMAN;tr|F8VVB9|F8VVB9_HUMAN;tr|F8VRZ4|F8VRZ4_HUMAN;tr|F5H5D3|F5H5D3_HUMAN;tr|F8VWV9|F8VWV9_HUMAN;tr|F8VQQ4|F8VQQ4_HUMAN;tr|F8VX09|F8VX09_HUMAN;tr|A0A1W2PQM2|A0A1W2PQM2_HUMAN;tr|F8VS66|F8VS66_HUMAN;sp|P68363|TBA1B_HUMAN;sp|P68363-2|TBA1B_HUMAN;sp|Q71U36|TBA1A_HUMAN;sp|Q71U36-2|TBA1A_HUMAN;sp|Q9BQE3|TBA1C_HUMAN	1.35424e+06	426488	703582	239136	233494	123827	0.00237389	FALSE
+56.063ALPFWNEEIVPQIK+56.063	sp|P18669|PGAM1_HUMAN;sp|P15259|PGAM2_HUMAN;sp|Q8N0Y7|PGAM4_HUMAN	936798	1.03081e+06	0	949501	0	572158	0.00237389	FALSE
+56.063LAPITSDPTEATAVGAVEASFK+56.063	tr|B4DNK4|B4DNK4_HUMAN;sp|P14618|KPYM_HUMAN;sp|P14618-3|KPYM_HUMAN	1.03207e+06	373283	0	882020	0	0	0.00237389	FALSE
+56.063QQAAYYGQTPGPGGPQPPPTQQGQQQAQ	tr|M0R3J3|M0R3J3_HUMAN;sp|Q92945|FUBP2_HUMAN	15314971	7777424	1.51144e+06	7710284	959418	2.58901e+06	0	FALSE
+56.063SAQQEASADVATPK+56.063	sp|Q8WYP5|ELYS_HUMAN;sp|Q8WYP5-2|ELYS_HUMAN;sp|Q8WYP5-3|ELYS_HUMAN	4.19041e+06	1.95686e+06	282953	1.98827e+06	255513	866302	0	FALSE
+56.063QSSVTQVTEQSPK+56.063	tr|C9JWN0|C9JWN0_HUMAN;sp|Q14966|ZN638_HUMAN;sp|Q14966-2|ZN638_HUMAN;sp|Q14966-3|ZN638_HUMAN;sp|Q14966-4|ZN638_HUMAN;sp|Q14966-6|ZN638_HUMAN	5.627e+06	2.71299e+06	301305	2.63961e+06	550482	1.62605e+06	0	FALSE
+56.063YQLDPTASISAK+56.063	tr|A0A0A0MR02|A0A0A0MR02_HUMAN;sp|P45880|VDAC2_HUMAN;sp|P45880-1|VDAC2_HUMAN;sp|P45880-2|VDAC2_HUMAN	11871800	7624875	56897.9	5.72489e+06	1.01636e+06	4128072	0.000399521	FALSE
+56.063NALANPLYC+57.021PDYR	tr|H3BRG4|H3BRG4_HUMAN;tr|H3BSJ9|H3BSJ9_HUMAN;tr|H3BP04|H3BP04_HUMAN;sp|P22695|QCR2_HUMAN	6040301	2.61295e+06	7773505	0	6.71445e+06	639718	0.00237389	FALSE
+56.063IINEPTAAAIAYGLDK+56.063	tr|E9PKE3|E9PKE3_HUMAN;tr|E9PI65|E9PI65_HUMAN;tr|E9PLF4|E9PLF4_HUMAN;tr|E9PN89|E9PN89_HUMAN;tr|Q53FA3|Q53FA3_HUMAN;sp|P11021|BIP_HUMAN;sp|P54652|HSP72_HUMAN;sp|P11142|HSP7C_HUMAN;sp|P11142-2|HSP7C_HUMAN;sp|P34931|HS71L_HUMAN	3.08096e+06	1.79649e+06	526709	1.40937e+06	1.55137e+06	1803465	0	FALSE
+56.063TTANAIYC+57.021PPK+56.063	tr|J3QS13|J3QS13_HUMAN;sp|O00231|PSD11_HUMAN;sp|O00231-2|PSD11_HUMAN	15552256	7.89136e+06	0	10854393	3.70907e+06	6.57892e+06	0.00237389	FALSE
+56.063GVVDSEDLPLNISR	sp|P07900|HS90A_HUMAN;sp|P07900-2|HS90A_HUMAN;sp|P08238|HS90B_HUMAN	8513649	3700348	350635	1.88175e+06	0	2242562	0.00237389	FALSE
+56.063GVVDSEDIPLNLSR	tr|I3L239|I3L239_HUMAN;tr|I3L0K7|I3L0K7_HUMAN;sp|Q12931|TRAP1_HUMAN;sp|Q12931-2|TRAP1_HUMAN	8513649	3700348	350635	1.88175e+06	0	2242562	0.00237389	FALSE
+56.063AC+57.021LDYPVTSVLPPASLC+57.021K+56.063	tr|A8MXQ1|A8MXQ1_HUMAN;tr|A8MZH8|A8MZH8_HUMAN;sp|P53801|PTTG_HUMAN	656342	348012	0	248814	127996	275742	0.00237389	FALSE
+56.063ASSTSLTSTQPTK+56.063	tr|E9PKD2|E9PKD2_HUMAN;tr|A0A0A0MSW3|A0A0A0MSW3_HUMAN;tr|H0Y837|H0Y837_HUMAN;tr|B7ZAV2|B7ZAV2_HUMAN;sp|P35658|NU214_HUMAN;sp|P35658-2|NU214_HUMAN;sp|P35658-3|NU214_HUMAN;sp|P35658-4|NU214_HUMAN;sp|P35658-5|NU214_HUMAN	1.58781e+06	651967	14633	750965	342555	805043	0.00145402	FALSE
+56.063TVVAPSAVAGK+56.063	sp|Q9NX14|NDUBB_HUMAN;sp|Q9NX14-2|NDUBB_HUMAN	22038456	11800712	969252	13509466	1.21674e+06	8061472	0	FALSE
+56.063SSGPTSLFAVTVAPPGAR	tr|A0A1W2PP35|A0A1W2PP35_HUMAN;tr|A0A1W2PPS1|A0A1W2PPS1_HUMAN;tr|A0A1X7SBS1|A0A1X7SBS1_HUMAN;tr|A0A1W2PP22|A0A1W2PP22_HUMAN;sp|Q00839|HNRPU_HUMAN;sp|Q00839-2|HNRPU_HUMAN	2.71097e+06	3243847	2.62855e+06	1.5335e+06	2.43315e+06	938646	0.00237389	FALSE
+56.063VDC+57.021QAYAQTC+57.021QK+56.063	sp|Q8IXB1|DJC10_HUMAN;sp|Q8IXB1-2|DJC10_HUMAN	618964	324289	84201.9	375712	120998	462258	0.00145402	FALSE
+56.063TIAEC+57.021LADELINAAK+56.063	tr|M0R0R2|M0R0R2_HUMAN;tr|M0R0F0|M0R0F0_HUMAN;tr|M0QZN2|M0QZN2_HUMAN;sp|P46782|RS5_HUMAN	1.4303e+06	1.25593e+06	476632	718227	476133	741976	0.00237389	FALSE
+56.063DNSTMGYMM+15.995AK+56.063	sp|P08238|HS90B_HUMAN;sp|Q58FF7|H90B3_HUMAN	7.50657e+06	2155009	2.99648e+06	1.42383e+06	1.23259e+06	1.26688e+06	0.00237389	FALSE
+56.063VATSSLDQTVK+56.063	tr|U3KQC1|U3KQC1_HUMAN;tr|K7EML4|K7EML4_HUMAN;tr|A0A0A0MQU0|A0A0A0MQU0_HUMAN;tr|K7EIR0|K7EIR0_HUMAN;sp|Q9BV38|WDR18_HUMAN	2.32018e+06	1.10856e+06	359086	1430942	765813	1.40719e+06	0.00237389	FALSE
+56.063SGAPPPSGSAVSTAPQPK+56.063	tr|H3BLV9|H3BLV9_HUMAN;sp|Q96SB4|SRPK1_HUMAN;sp|Q96SB4-3|SRPK1_HUMAN;sp|Q96SB4-4|SRPK1_HUMAN	6652496	2950704	492535	3.15791e+06	992638	1889372	0	FALSE
+56.063NYIQGINLVQAK+56.063	tr|B4DLN1|B4DLN1_HUMAN;sp|P52815|RM12_HUMAN	861881	545311	576421	487740	0	135519	0.00237389	FALSE
+56.063SAAQAAAQTNSNAAGK+56.063	sp|Q8NC51|PAIRB_HUMAN;sp|Q8NC51-2|PAIRB_HUMAN;sp|Q8NC51-3|PAIRB_HUMAN;sp|Q8NC51-4|PAIRB_HUMAN	137361	69526.7	23893	62971	44986.1	14973.1	0.00237389	FALSE
+56.063TQIQSVEPYTK+56.063	tr|G8JLH9|G8JLH9_HUMAN;sp|P40763|STAT3_HUMAN;sp|P40763-2|STAT3_HUMAN;sp|P40763-3|STAT3_HUMAN	5552359	1.88969e+06	992985	1.70804e+06	628598	2.05417e+06	0	FALSE
+56.063VM+15.995TIPYQPMPASSPVIC+57.021AGGQDR	sp|Q15365|PCBP1_HUMAN	9090396	5304382	3.15232e+06	4.81175e+06	1.35666e+06	3.29888e+06	0	FALSE
+56.063LLQQGTAPAQAK+56.063	sp|Q86YP4|P66A_HUMAN;sp|Q86YP4-2|P66A_HUMAN;sp|Q86YP4-3|P66A_HUMAN	5587444	2242380	850000	2.43664e+06	1.44568e+06	1605497	0	FALSE
+56.063QAQIEVVPSASALIIK+56.063	sp|P30050|RL12_HUMAN	15370670	7603556	376049	7.77423e+06	1.04127e+06	3.38491e+06	0	FALSE
+56.063AAAPAPVSEAVC+57.021R	tr|E9PCH5|E9PCH5_HUMAN;tr|E7EVY3|E7EVY3_HUMAN;tr|A0A0A0MR45|A0A0A0MR45_HUMAN;tr|H0Y7F0|H0Y7F0_HUMAN;tr|H0YD33|H0YD33_HUMAN;tr|E7ES10|E7ES10_HUMAN;tr|H0Y9H6|H0Y9H6_HUMAN;tr|E7EQ12|E7EQ12_HUMAN;tr|A0A0C4DGB5|A0A0C4DGB5_HUMAN;tr|E9PDE4|E9PDE4_HUMAN;tr|E7EQA0|E7EQA0_HUMAN;tr|B7Z574|B7Z574_HUMAN;sp|P20810|ICAL_HUMAN;sp|P20810-2|ICAL_HUMAN;sp|P20810-3|ICAL_HUMAN;sp|P20810-4|ICAL_HUMAN;sp|P20810-5|ICAL_…	10633919	5586353	168969	5.59434e+06	875590	2.15874e+06	0.000399521	FALSE
+56.063TAPYVVTGSVDQTVK+56.063	tr|I3L3N5|I3L3N5_HUMAN;sp|P43034|LIS1_HUMAN	15752012	6998060	1.10508e+06	7.64651e+06	2.26868e+06	3.20862e+06	0	FALSE
+56.063ESTGNMVTGQTVC+57.021K+56.063	tr|E7EN77|E7EN77_HUMAN;sp|Q15021|CND1_HUMAN	5564847	3.86898e+06	1.29243e+06	2.51519e+06	1.78026e+06	1305750	0	FALSE
+56.063IVEQPTVSVTEPK+56.063	sp|Q15054|DPOD3_HUMAN;sp|Q15054-2|DPOD3_HUMAN;sp|Q15054-3|DPOD3_HUMAN	4.99121e+06	3.14897e+06	576620	1.80152e+06	560520	386432	0.00145402	FALSE
+56.063AAGVNVEPFWPGLFAK+56.063	sp|P05386|RLA1_HUMAN	467835	128472	118539	165258	123004	144932	0.00237389	FALSE
+56.063NQDLAPNSAEQASILSLVTK+56.063	tr|A0A0A0MRL0|A0A0A0MRL0_HUMAN;tr|X6R6Z1|X6R6Z1_HUMAN;tr|B4DY09|B4DY09_HUMAN;sp|Q12905|ILF2_HUMAN	711137	423754	0	554232	89158	260469	0.00237389	FALSE
+56.063TYADYESVNEC+57.021M+15.995EGVC+57.021K+56.063	tr|G3V279|G3V279_HUMAN;sp|P84090|ERH_HUMAN	14158258	11115388	6335778	10352721	20381468	13976731	0	FALSE
+56.063ITSPLMEPSSIEK+56.063	sp|P28066|PSA5_HUMAN	8694353	7.87385e+06	10868820	18720178	4.88035e+06	2.31388e+06	0.00145402	FALSE
+56.063LLVVDPETDEQLQK+56.063	tr|J3QRP6|J3QRP6_HUMAN;sp|O14745|NHRF1_HUMAN	2.09367e+06	943637	8093.32	3.09303e+06	0	457773	0.000399521	FALSE
+56.063AADPPAENSSAPEAEQGGAE	tr|H0Y449|H0Y449_HUMAN;sp|P67809|YBOX1_HUMAN	118351992	65587904	7772601	61639580	12883134	17562646	0.00237389	FALSE
+56.063VDNSSLTGESEPQTR	tr|B1AKY9|B1AKY9_HUMAN;tr|M0R116|M0R116_HUMAN;tr|A0A0A0MT26|A0A0A0MT26_HUMAN;tr|A0A2R8YEY8|A0A2R8YEY8_HUMAN;tr|M0QXF2|M0QXF2_HUMAN;sp|P13637|AT1A3_HUMAN;sp|P13637-2|AT1A3_HUMAN;sp|P13637-3|AT1A3_HUMAN;sp|P05023|AT1A1_HUMAN;sp|P05023-2|AT1A1_HUMAN;sp|P05023-3|AT1A1_HUMAN;sp|P05023-4|AT1A1_HUMAN;sp|P50993|AT1A2_HUMAN;sp|P20648|ATP4A_HUMAN	1.42017e+06	436380	558761	912982	488779	514528	0.00237389	FALSE
+56.063QQLLIGAYAK+56.063	sp|Q99832|TCPH_HUMAN;sp|Q99832-2|TCPH_HUMAN;sp|Q99832-3|TCPH_HUMAN;sp|Q99832-4|TCPH_HUMAN	774282	558860	235533	176154	539866	578798	0.00145402	FALSE
+56.063ADVDVQPYAFTTK+56.063	sp|Q9BZE4|NOG1_HUMAN;sp|Q9BZE4-2|NOG1_HUMAN;sp|Q9BZE4-3|NOG1_HUMAN	9349502	7115393	4.16669e+06	1128917	2.81978e+06	1.75174e+06	0.00237389	FALSE
+56.063AIEINPDSAQPYK+56.063	tr|Q3KNR6|Q3KNR6_HUMAN;tr|H7C3I1|H7C3I1_HUMAN;tr|F6VDH7|F6VDH7_HUMAN;sp|P50502|F10A1_HUMAN;sp|Q8NFI4|F10A5_HUMAN;sp|Q8IZP2|ST134_HUMAN	39726136	52800868	46541660	7.09588e+06	4.40366e+06	762488	0.00237389	FALSE
+56.063LVVPASQC+57.021GSLIGK+56.063	tr|E9PFP8|E9PFP8_HUMAN;tr|F8VZX2|F8VZX2_HUMAN;tr|H3BND9|H3BND9_HUMAN;tr|F8VXH9|F8VXH9_HUMAN;tr|F8W0G4|F8W0G4_HUMAN;tr|J3QT27|J3QT27_HUMAN;tr|F8W1G6|F8W1G6_HUMAN;tr|H3BRU6|H3BRU6_HUMAN;sp|Q15366|PCBP2_HUMAN;sp|Q15366-2|PCBP2_HUMAN;sp|Q15366-3|PCBP2_HUMAN;sp|Q15366-4|PCBP2_HUMAN;sp|Q15366-5|PCBP2_HUMAN;sp|Q15366-6|PCBP2_HUMAN;sp|Q15366-7|PCBP2_HUMAN;sp|Q15366-8|PCBP2_HUMAN;sp|P57721|PCBP3_HUMAN;sp|…	6.5294e+06	4.25598e+06	2.13623e+06	4.41946e+06	0	3.98269e+06	0.00145402	FALSE
+56.063DASLMVTNDGATILK+56.063	tr|F5GWF6|F5GWF6_HUMAN;tr|F8VQ14|F8VQ14_HUMAN;sp|P78371|TCPB_HUMAN;sp|P78371-2|TCPB_HUMAN	3.16867e+06	3.36903e+06	3.40707e+06	4.15734e+06	130714	0	0.00237389	FALSE
+56.063QAGPAPAAATAASK+56.063	sp|Q9BTC0|DIDO1_HUMAN;sp|Q9BTC0-1|DIDO1_HUMAN	937518	490395	85120.5	1.60913e+06	548794	516132	0.00237389	FALSE
+56.063EQVANSAFVER	sp|P08238|HS90B_HUMAN;sp|Q58FF7|H90B3_HUMAN	9001351	4817593	198565	4708453	1.08038e+06	2439858	0	FALSE
+56.063AM+15.995GIMNSFVNDIFER	tr|U3KQK0|U3KQK0_HUMAN;sp|Q99877|H2B1N_HUMAN;sp|P23527|H2B1O_HUMAN;sp|P57053|H2BFS_HUMAN;sp|P62807|H2B1C_HUMAN;sp|P58876|H2B1D_HUMAN;sp|Q5QNW6|H2B2F_HUMAN;sp|Q5QNW6-2|H2B2F_HUMAN;sp|P06899|H2B1J_HUMAN;sp|O60814|H2B1K_HUMAN;sp|Q16778|H2B2E_HUMAN;sp|Q93079|H2B1H_HUMAN;sp|Q8N257|H2B3B_HUMAN;sp|P33778|H2B1B_HUMAN;sp|Q99880|H2B1L_HUMAN;sp|Q99879|H2B1M_HUMAN	161422	0	84083.6	53768.3	57951.2	56718	0.000399521	FALSE
+56.063LQQGAGLESPQGQPEPGAASPQR	sp|Q9H6F5|CCD86_HUMAN	1.03858e+06	609181	103834	1.10641e+06	261309	211258	0.00237389	FALSE
+56.063EQTADGVAVIPVLQR	tr|H0YEY4|H0YEY4_HUMAN;tr|A6NFX8|A6NFX8_HUMAN;tr|A6NCQ0|A6NCQ0_HUMAN;tr|A6NJU6|A6NJU6_HUMAN;sp|Q9UKK9|NUDT5_HUMAN	3.6878e+06	1.39613e+06	1.01361e+06	1.98732e+06	418445	1.7524e+06	0	FALSE
+56.063VLQATVVAVGSGSK+56.063	tr|S4R3N1|S4R3N1_HUMAN;tr|B8ZZL8|B8ZZL8_HUMAN;sp|P61604|CH10_HUMAN	14595761	7997327	1.56637e+06	7.80966e+06	1.78359e+06	3561328	0	FALSE
+56.063ASIQAASAESSGQK+56.063	tr|E9PRB3|E9PRB3_HUMAN;tr|J3KP30|J3KP30_HUMAN;sp|Q5QJE6|TDIF2_HUMAN	1.28153e+06	1.92931e+06	415040	793233	240425	495372	0.00237389	FALSE
+56.063NQGGYGGSSSSSSYGSGR	tr|F8W6I7|F8W6I7_HUMAN;tr|A0A2R8Y4L2|A0A2R8Y4L2_HUMAN;tr|H0YH80|H0YH80_HUMAN;sp|P09651|ROA1_HUMAN;sp|P09651-2|ROA1_HUMAN;sp|P09651-3|ROA1_HUMAN	3.102e+06	3.27248e+06	877743	1.31148e+06	1.58484e+06	658107	0	FALSE
+56.063ISLPLPNFSSLNLR	tr|B0YJC4|B0YJC4_HUMAN;sp|P08670|VIME_HUMAN	1.42218e+06	659284	76434.8	792181	149956	287469	0	FALSE
+56.063ETVSEESNVLC+57.021LSK+56.063	sp|P13639|EF2_HUMAN	9853695	5.80631e+06	1.10276e+06	5296212	1.03892e+06	2.44314e+06	0.000399521	FALSE
+56.063AFLADPSAFVAAAPVAAATTAAPAAAAAPAK+56.063	tr|F8VWS0|F8VWS0_HUMAN;tr|F8W1K8|F8W1K8_HUMAN;sp|P05388|RLA0_HUMAN;sp|P05388-2|RLA0_HUMAN	458801	597107	0	175457	0	294356	0.00237389	FALSE
+56.063VANVSAAEDSVSQR	tr|G3V0G3|G3V0G3_HUMAN;tr|H7C3E9|H7C3E9_HUMAN;tr|F8WDT8|F8WDT8_HUMAN;sp|Q9NY93|DDX56_HUMAN;sp|Q9NY93-2|DDX56_HUMAN	1.5177e+06	510913	267668	576186	0	780124	0	FALSE
+56.063GGPASVPSSSPGTSVK+56.063	tr|J3KRZ2|J3KRZ2_HUMAN;tr|J3KRI4|J3KRI4_HUMAN;sp|O43237|DC1L2_HUMAN;sp|O43237-2|DC1L2_HUMAN	4.02257e+06	2207812	906118	2.42564e+06	848581	1084444	0.000399521	FALSE
+56.063NQVAM+15.995NPTNTVFDAK+56.063	tr|E9PN25|E9PN25_HUMAN;tr|E9PKE3|E9PKE3_HUMAN;tr|E9PNE6|E9PNE6_HUMAN;tr|E9PQQ4|E9PQQ4_HUMAN;tr|E9PLF4|E9PLF4_HUMAN;tr|E9PPY6|E9PPY6_HUMAN;tr|E9PK54|E9PK54_HUMAN;tr|E9PQK7|E9PQK7_HUMAN;sp|P11142|HSP7C_HUMAN;sp|P11142-2|HSP7C_HUMAN	14464473	5.20946e+06	3.48406e+06	7.30959e+06	1.65027e+06	5132089	0	FALSE
+56.063GISAGAVQTAGK+56.063	tr|F5GWB7|F5GWB7_HUMAN;tr|F5H709|F5H709_HUMAN;sp|P46087|NOP2_HUMAN;sp|P46087-4|NOP2_HUMAN	4.15915e+06	1.12791e+06	1.56411e+06	1.63338e+06	864206	1.19077e+06	0	FALSE
+56.063VSQGQLVVMQPEK+56.063	sp|P13667|PDIA4_HUMAN	3.53326e+06	2395276	1.50345e+06	2.71788e+06	0	1.72538e+06	0	FALSE
+56.063IAPAEAPDAK+56.063	sp|O00425|IF2B3_HUMAN;sp|O00425-2|IF2B3_HUMAN	4774816	1629246	318947	1.79168e+06	343445	881264	0.00237389	FALSE
+56.063STSAPQM+15.995SPGSSDNQSSSPQPAQQK+56.063	tr|F8W726|F8W726_HUMAN;sp|Q14157|UBP2L_HUMAN;sp|Q14157-1|UBP2L_HUMAN;sp|Q14157-3|UBP2L_HUMAN;sp|Q14157-4|UBP2L_HUMAN;sp|Q14157-5|UBP2L_HUMAN	6.51138e+06	4544385	393094	2353903	647187	635388	0	FALSE
+56.063APPTAC+57.021YAGAAPAPSQVK+56.063	sp|P17676|CEBPB_HUMAN;sp|P17676-2|CEBPB_HUMAN;sp|P17676-3|CEBPB_HUMAN	7.26118e+06	3.03466e+06	4.17396e+06	6009836	1.92868e+06	5.91818e+06	0.00237389	FALSE
+56.063NFILDQTNVSAAAQR	tr|A0A1W2PQL0|A0A1W2PQL0_HUMAN;tr|A0A1W2PQD4|A0A1W2PQD4_HUMAN;tr|A0A1W2PP34|A0A1W2PP34_HUMAN;tr|Q5RI18|Q5RI18_HUMAN;tr|A0A1W2PQ74|A0A1W2PQ74_HUMAN;tr|A0A1W2PPH7|A0A1W2PPH7_HUMAN;tr|A0A1W2PP35|A0A1W2PP35_HUMAN;tr|A0A1W2PPL4|A0A1W2PPL4_HUMAN;tr|A0A1W2PPS1|A0A1W2PPS1_HUMAN;tr|A0A1X7SBS1|A0A1X7SBS1_HUMAN;tr|A0A1W2PRZ7|A0A1W2PRZ7_HUMAN;sp|Q00839|HNRPU_HUMAN;sp|Q00839-2|HNRPU_HUMAN	14721375	8075292	6.27286e+06	3.70899e+06	2.73923e+06	1.03692e+06	0	FALSE
+56.063APSVPAAEPEYPK+56.063	tr|G3V213|G3V213_HUMAN;tr|F8VY04|F8VY04_HUMAN;tr|F8VZG5|F8VZG5_HUMAN;tr|F8W1A4|F8W1A4_HUMAN;tr|F8VPP1|F8VPP1_HUMAN;sp|P54819|KAD2_HUMAN;sp|P54819-2|KAD2_HUMAN;sp|P54819-3|KAD2_HUMAN;sp|P54819-5|KAD2_HUMAN	91769552	45762080	4608838	49220776	8693645	22098906	0	FALSE
+56.063STAPAVAYDSK+56.063	sp|Q96KR1|ZFR_HUMAN	7.91612e+06	3588881	212406	3.53361e+06	524154	1.95452e+06	0	FALSE
+56.063VASVSQNAIVSAAGNIAR	tr|E9PF10|E9PF10_HUMAN;sp|O75694|NU155_HUMAN;sp|O75694-2|NU155_HUMAN	9382967	240504	505610	4946429	903274	3.32482e+06	0.00237389	FALSE
+56.063DGDFENPVPYTGAVK+56.063	tr|F8VY02|F8VY02_HUMAN;sp|P30040|ERP29_HUMAN	23514098	11669356	1.67895e+06	10947088	952006	6.11136e+06	0	FALSE
+56.063VMTIPYQPMPASSPVIC+57.021AGGQDR	sp|Q15365|PCBP1_HUMAN	5598892	2394047	1.55839e+06	5322778	288262	8511551	0.000399521	FALSE
+56.063SYELPDGQVITIGNER	tr|A0A2R8Y793|A0A2R8Y793_HUMAN;tr|A0A2R8YEA7|A0A2R8YEA7_HUMAN;sp|A5A3E0|POTEF_HUMAN;sp|P63261|ACTG_HUMAN;sp|Q9BYX7|ACTBM_HUMAN;sp|Q562R1|ACTBL_HUMAN;sp|P68133|ACTS_HUMAN;sp|P60709|ACTB_HUMAN;sp|P68032|ACTC_HUMAN;sp|P63267|ACTH_HUMAN;sp|P63267-2|ACTH_HUMAN;sp|P62736|ACTA_HUMAN;sp|Q6S8J3|POTEE_HUMAN	12090735	5.15555e+06	586238	5953514	491131	3.44693e+06	0	FALSE
+56.063AGGGPTLQC+57.021PPPSSPEK+56.063	sp|Q96N66|MBOA7_HUMAN;sp|Q96N66-2|MBOA7_HUMAN;sp|Q96N66-3|MBOA7_HUMAN	5348927	2.70459e+06	389571	2.62889e+06	1.29191e+06	1.85928e+06	0	FALSE
+56.063ESYSVYVYK+56.063	tr|U3KQK0|U3KQK0_HUMAN;sp|Q99877|H2B1N_HUMAN;sp|P57053|H2BFS_HUMAN;sp|P62807|H2B1C_HUMAN;sp|P58876|H2B1D_HUMAN;sp|Q5QNW6|H2B2F_HUMAN;sp|Q5QNW6-2|H2B2F_HUMAN;sp|O60814|H2B1K_HUMAN;sp|Q93079|H2B1H_HUMAN;sp|Q99880|H2B1L_HUMAN;sp|Q99879|H2B1M_HUMAN	23244492	15618262	2.32273e+06	14023344	3.51596e+06	9917819	0	FALSE
+56.063AQAAAPASVPAQAPK+56.063	tr|A0A3B3ITT5|A0A3B3ITT5_HUMAN;sp|P47914|RL29_HUMAN	2062819968	984668800	102267464	1004244352	185196160	458260576	0	FALSE
+56.063AAYPDLENPPLLVTPSQQAK+56.063	tr|E5RJM9|E5RJM9_HUMAN;sp|P54136|SYRC_HUMAN;sp|P54136-2|SYRC_HUMAN	10355870	5.1628e+06	1.02033e+06	6003772	1.83485e+06	2.98452e+06	0	FALSE
+56.063DASLM+15.995VTNDGATILK+56.063	tr|F5GWF6|F5GWF6_HUMAN;tr|F8VQ14|F8VQ14_HUMAN;sp|P78371|TCPB_HUMAN;sp|P78371-2|TCPB_HUMAN	1.85605e+06	1949533	1.19075e+06	2.6919e+06	3.04226e+06	2.6282e+06	0	FALSE
+56.063DNQLSEVANK+56.063	tr|S4R349|S4R349_HUMAN;tr|S4R402|S4R402_HUMAN;tr|S4R341|S4R341_HUMAN;tr|A0A0A0MRM9|A0A0A0MRM9_HUMAN;sp|Q14978|NOLC1_HUMAN;sp|Q14978-2|NOLC1_HUMAN;sp|Q14978-3|NOLC1_HUMAN	4469870	1.49657e+06	113153	1.63215e+06	321603	564993	0	FALSE
+56.063QAQEYEALLNIK+56.063	tr|F8VZY9|F8VZY9_HUMAN;sp|P05783|K1C18_HUMAN	3405353	1.55851e+06	1.00056e+06	1210216	568100	712194	0	FALSE
+56.063LQQTYAALNSK+56.063	tr|H0YLE8|H0YLE8_HUMAN;sp|P46940|IQGA1_HUMAN	5147868	1.90304e+06	299414	2269192	192788	1.14427e+06	0.00237389	FALSE
+56.063SNVSDAVAQSTR	sp|P60174|TPIS_HUMAN;sp|P60174-1|TPIS_HUMAN;sp|P60174-4|TPIS_HUMAN	2.87831e+06	736559	3.73279e+06	220070	675234	65625.9	0.00237389	FALSE
+56.063APSVPAAEPEYPK+56.063	tr|G3V213|G3V213_HUMAN;tr|F8VY04|F8VY04_HUMAN;tr|F8VZG5|F8VZG5_HUMAN;tr|F8W1A4|F8W1A4_HUMAN;tr|F8VPP1|F8VPP1_HUMAN;sp|P54819|KAD2_HUMAN;sp|P54819-2|KAD2_HUMAN;sp|P54819-3|KAD2_HUMAN;sp|P54819-5|KAD2_HUMAN	124079960	61798600	5.55812e+06	64054492	11954677	29647846	0	FALSE
+56.063GIFPVLC+57.021K+56.063DPVQEAWAEDVDLR	tr|B4DNK4|B4DNK4_HUMAN;tr|H3BR70|H3BR70_HUMAN;sp|P14618|KPYM_HUMAN;sp|P14618-2|KPYM_HUMAN;sp|P14618-3|KPYM_HUMAN	810338	611451	646686	686756	0	791911	0.00237389	FALSE
+56.063TITYQAVPSEVPNEEPK+56.063	tr|F8WAE5|F8WAE5_HUMAN;tr|H7C5R5|H7C5R5_HUMAN;sp|Q9BY44|EIF2A_HUMAN;sp|Q9BY44-2|EIF2A_HUMAN;sp|Q9BY44-3|EIF2A_HUMAN;sp|Q9BY44-4|EIF2A_HUMAN	10537607	5154400	0	6611470	1.34913e+06	4.33785e+06	0	FALSE
+56.063DAQDVQASQAEADQQQTR	tr|A0A087WVV2|A0A087WVV2_HUMAN;tr|F8W7S5|F8W7S5_HUMAN;sp|Q9P2E9|RRBP1_HUMAN;sp|Q9P2E9-3|RRBP1_HUMAN	583548	365949	79253.2	230291	22486	141830	0.00237389	FALSE
+56.063C+57.021IPALDSLTPANEDQK+56.063	sp|P10809|CH60_HUMAN	9928247	5470775	7.25124e+06	4953910	5.33021e+06	4303190	0.00237389	FALSE
+56.063TVGVEPAADGK+56.063	tr|H0YLP6|H0YLP6_HUMAN;tr|H0YKD8|H0YKD8_HUMAN;tr|H0YMF4|H0YMF4_HUMAN;sp|P46779|RL28_HUMAN;sp|P46779-2|RL28_HUMAN;sp|P46779-3|RL28_HUMAN;sp|P46779-4|RL28_HUMAN;sp|P46779-5|RL28_HUMAN	3.58141e+06	1.52246e+06	684089	1.47684e+06	482733	502363	0.00145402	FALSE
+56.063AGEAPTENPAPPTQQSSAE	sp|P16989|YBOX3_HUMAN;sp|P16989-2|YBOX3_HUMAN	41221136	21184318	2.87921e+06	21162310	4779006	8797128	0.00237389	FALSE
+56.063TTPDVIFVFGFR	tr|A0A2R8Y849|A0A2R8Y849_HUMAN;tr|A0A2R8Y8A0|A0A2R8Y8A0_HUMAN;tr|A0A087WUS0|A0A087WUS0_HUMAN;tr|E7ETK0|E7ETK0_HUMAN;tr|A0A2R8YD14|A0A2R8YD14_HUMAN;sp|P62847|RS24_HUMAN;sp|P62847-2|RS24_HUMAN;sp|P62847-3|RS24_HUMAN;sp|P62847-4|RS24_HUMAN	540557	145772	130281	168637	70504.5	64422.2	0	FALSE
+56.063SSPEVSSINQEALVLTAK+56.063	tr|E5RGS9|E5RGS9_HUMAN;sp|Q9NRG0|CHRC1_HUMAN	2402645	2.17353e+06	1.63413e+06	1.843e+06	0	2.5698e+06	0.00237389	FALSE
+56.063ATENDIANFFSPLNPIR	sp|P31942|HNRH3_HUMAN;sp|P31942-2|HNRH3_HUMAN;sp|P31942-3|HNRH3_HUMAN;sp|P31942-4|HNRH3_HUMAN;sp|P31942-5|HNRH3_HUMAN;sp|P31942-6|HNRH3_HUMAN	451147	484265	0	127861	269670	273169	0.00237389	FALSE
+56.063TSTTGVATTQSPTPR	tr|F8WD26|F8WD26_HUMAN;tr|A0A0A0MTE2|A0A0A0MTE2_HUMAN;tr|J3KP06|J3KP06_HUMAN;tr|E9PMS6|E9PMS6_HUMAN;tr|E9PMT2|E9PMT2_HUMAN;sp|Q8WWI1|LMO7_HUMAN;sp|Q8WWI1-2|LMO7_HUMAN;sp|Q8WWI1-3|LMO7_HUMAN;sp|Q8WWI1-4|LMO7_HUMAN;sp|Q8WWI1-5|LMO7_HUMAN	5.39518e+06	2.58821e+06	477235	3.08789e+06	553334	1208794	0	FALSE
+56.063SPTTTASVSATAAPR	sp|Q15723|ELF2_HUMAN;sp|Q15723-1|ELF2_HUMAN;sp|Q15723-2|ELF2_HUMAN;sp|Q15723-3|ELF2_HUMAN;sp|Q15723-4|ELF2_HUMAN	1.07725e+06	685953	469892	1.05333e+06	712981	585915	0.00237389	FALSE
+56.063ATEPPSPDAGELSLASR	sp|Q8IYB8|SUV3_HUMAN	10648229	5362528	0	6107887	2.65801e+06	3.78825e+06	0.00145402	FALSE
+56.063QVLVAPGNAGTAC+57.021SEK+56.063	tr|C9JKQ7|C9JKQ7_HUMAN;tr|C9JZG2|C9JZG2_HUMAN;tr|C9JBJ1|C9JBJ1_HUMAN;tr|C9JTV6|C9JTV6_HUMAN;tr|F8WD69|F8WD69_HUMAN;sp|P22102|PUR2_HUMAN;sp|P22102-2|PUR2_HUMAN	15841686	8631053	1939261	7.75608e+06	9599911	4762602	0.000789266	FALSE
+56.063SSSQIPAQPSVAK+56.063	tr|A0A0A0MS30|A0A0A0MS30_HUMAN;tr|E7EPN9|E7EPN9_HUMAN;sp|Q9Y520|PRC2C_HUMAN;sp|Q9Y520-2|PRC2C_HUMAN;sp|Q9Y520-3|PRC2C_HUMAN;sp|Q9Y520-4|PRC2C_HUMAN;sp|Q9Y520-5|PRC2C_HUMAN;sp|Q9Y520-6|PRC2C_HUMAN;sp|Q9Y520-7|PRC2C_HUMAN	8410069	4.06301e+06	248384	4353875	425596	2.64584e+06	0.000399521	FALSE
+56.063TDAVLPLTVAEVQK+56.063	tr|H3BUX1|H3BUX1_HUMAN;tr|H3BMA1|H3BMA1_HUMAN;sp|Q13421|MSLN_HUMAN;sp|Q13421-3|MSLN_HUMAN;sp|Q13421-2|MSLN_HUMAN;sp|Q13421-4|MSLN_HUMAN	1698361	1.16833e+06	1.27289e+06	1.70676e+06	0	0	0.00237389	FALSE
+56.063LAYINPDLALEEK+56.063	sp|P31948|STIP1_HUMAN;sp|P31948-2|STIP1_HUMAN;sp|P31948-3|STIP1_HUMAN	4.74144e+06	2.54122e+06	1.92343e+06	4.30527e+06	2.74389e+06	3735892	0	FALSE
+56.063EIFDSRGNPTVEVDLFTSK+56.063	tr|K7ERS8|K7ERS8_HUMAN;tr|K7EM90|K7EM90_HUMAN;tr|A0A2R8Y798|A0A2R8Y798_HUMAN;tr|A0A2R8YEG5|A0A2R8YEG5_HUMAN;tr|A0A2R8Y879|A0A2R8Y879_HUMAN;tr|A0A2R8Y6G6|A0A2R8Y6G6_HUMAN;tr|A0A2R8YEM5|A0A2R8YEM5_HUMAN;sp|P06733|ENOA_HUMAN	9900443	3.86194e+06	936478	2.28144e+06	0	0	0.00237389	FALSE
+56.063SGDSEVYQLGDVSQK+56.063	tr|A0A0G2JLD8|A0A0G2JLD8_HUMAN;tr|E7EUY5|E7EUY5_HUMAN;tr|C9K0U8|C9K0U8_HUMAN;sp|Q04837|SSBP_HUMAN	12490295	4.60747e+06	1.1139e+06	4.03141e+06	2.76106e+06	3768580	0.000789266	FALSE
+56.063LAQYEPPQEEK+56.063	tr|A0A087WV05|A0A087WV05_HUMAN;sp|Q99417|MYCBP_HUMAN	7.48301e+06	5.74534e+06	3706797	3.71905e+06	1918597	1.77144e+06	0.00237389	FALSE
+56.063ISLPLPNFSSLNLR	tr|B0YJC4|B0YJC4_HUMAN;sp|P08670|VIME_HUMAN	3285254	1.55538e+06	99107.3	1.65933e+06	236446	825213	0	FALSE
+56.063IAVEPVNPSELPK+56.063	sp|Q15029|U5S1_HUMAN;sp|Q15029-2|U5S1_HUMAN;sp|Q15029-3|U5S1_HUMAN	27221744	13360426	1820461	14197644	2.48954e+06	7067781	0	FALSE
+56.063AVFVDLEPTVIDEVR	tr|F8VRK0|F8VRK0_HUMAN;tr|F8VVB9|F8VVB9_HUMAN;tr|F8VRZ4|F8VRZ4_HUMAN;tr|F5H5D3|F5H5D3_HUMAN;tr|F8VWV9|F8VWV9_HUMAN;tr|F8VQQ4|F8VQQ4_HUMAN;tr|F8VX09|F8VX09_HUMAN;tr|A0A1W2PQM2|A0A1W2PQM2_HUMAN;tr|F8VS66|F8VS66_HUMAN;sp|P68363|TBA1B_HUMAN;sp|P68363-2|TBA1B_HUMAN;sp|Q71U36|TBA1A_HUMAN;sp|Q71U36-2|TBA1A_HUMAN;sp|Q9BQE3|TBA1C_HUMAN	2.34857e+06	1.00244e+06	0	901606	517986	220635	0	FALSE
+56.063YQAVTATLEEK+56.063	tr|Q8J015|Q8J015_HUMAN;tr|M0QYS1|M0QYS1_HUMAN;sp|Q6NVV1|R13P3_HUMAN;sp|P40429|RL13A_HUMAN	22608402	9469749	617878	8584460	3.49731e+06	5.9503e+06	0	FALSE
+56.063EAAGTTAAAGTGGATEQPPR	tr|E9PQI8|E9PQI8_HUMAN;sp|O43290|SNUT1_HUMAN	947267	371439	63581.6	341327	289553	189080	0.00237389	FALSE
+56.063TATESFASDPILYRPVAVALDTK+56.063GPEIR	tr|H3BQ34|H3BQ34_HUMAN;tr|H3BTJ2|H3BTJ2_HUMAN;tr|H3BT25|H3BT25_HUMAN;tr|H3BTN5|H3BTN5_HUMAN;tr|H3BUW1|H3BUW1_HUMAN;sp|P14618|KPYM_HUMAN;sp|P14618-2|KPYM_HUMAN;sp|P14618-3|KPYM_HUMAN	9522838	11637960	13324887	16406306	8487463	11050273	0.00237389	FALSE
+56.063TTETQVFVATPQK+56.063	tr|A0A2R8Y6I1|A0A2R8Y6I1_HUMAN;tr|A0A2R8Y5P7|A0A2R8Y5P7_HUMAN;tr|D6RB22|D6RB22_HUMAN;tr|A0A2R8Y3N3|A0A2R8Y3N3_HUMAN;tr|B4DQ67|B4DQ67_HUMAN;sp|P49590|SYHM_HUMAN;sp|P49590-2|SYHM_HUMAN	3.19323e+06	1.72588e+06	18197014	2.271e+06	2.07561e+06	0	0.00237389	FALSE
+56.063GC+57.021PVNTEPSGPTC+57.021EK+56.063	sp|P53701|CCHL_HUMAN	2.16453e+06	972192	375993	1.07462e+06	378840	986496	0.00145402	FALSE
+56.063GGPASVPSSSPGTSVK+56.063	tr|J3KRZ2|J3KRZ2_HUMAN;tr|J3KRI4|J3KRI4_HUMAN;sp|O43237|DC1L2_HUMAN;sp|O43237-2|DC1L2_HUMAN	1.8491e+06	1.16298e+06	217482	775370	471856	417168	0	FALSE
+56.063LPEVQQATK+56.063	tr|E7ETY2|E7ETY2_HUMAN;tr|A0A3B3IS06|A0A3B3IS06_HUMAN;tr|J3KQ96|J3KQ96_HUMAN;sp|Q13428|TCOF_HUMAN;sp|Q13428-2|TCOF_HUMAN;sp|Q13428-3|TCOF_HUMAN;sp|Q13428-4|TCOF_HUMAN;sp|Q13428-6|TCOF_HUMAN;sp|Q13428-7|TCOF_HUMAN;sp|Q13428-8|TCOF_HUMAN	3.04957e+06	1.54189e+06	561265	3.01545e+06	1.60432e+06	576776	0.00563222	FALSE
+56.063C+57.021TGGEVGATSALAPK+56.063	sp|P30050|RL12_HUMAN;sp|P30050-2|RL12_HUMAN	59216128	30340070	2.35959e+06	30363286	6.14747e+06	15552588	0	FALSE
+56.063QEPLLIGSTK+56.063	tr|A0A0U1RQF0|A0A0U1RQF0_HUMAN;sp|P49327|FAS_HUMAN	3.11594e+06	1.19127e+06	0	308549	782184	779451	0.00237389	FALSE
+56.063ILLTEPPM+15.995NPTK+56.063	tr|F5H6T1|F5H6T1_HUMAN;sp|P61160|ARP2_HUMAN;sp|P61160-2|ARP2_HUMAN	7.20033e+06	6220934	6010528	3954724	352682	0	0.00431282	FALSE
+56.063VQESADELQK+56.063	tr|C9J1Z8|C9J1Z8_HUMAN;sp|P84085|ARF5_HUMAN	1.86988e+06	749102	47949.4	513366	173689	263212	0.00293083	FALSE
+56.063TPTSSPASSPLVAK+56.063	sp|Q14684|RRP1B_HUMAN;sp|Q14684-2|RRP1B_HUMAN	12223294	6.85202e+06	0	8646971	1.08305e+06	4.18116e+06	0	FALSE
+56.063GLTAVSNNAGVDNFGLGLLLR	sp|P55809|SCOT1_HUMAN	2231224	469118	904407	732938	237751	433616	0.000789266	FALSE
+56.063ASAGPQPLLVQSC+57.021K+56.063	sp|Q9Y490|TLN1_HUMAN	5277589	4619488	1.37341e+06	2.71974e+06	2.13589e+06	1.42773e+06	0.00237389	FALSE
+56.063EVPAVPETLK+56.063	sp|P18124|RL7_HUMAN	31245732	15173506	1.74773e+06	18698832	3.07476e+06	9611315	0	FALSE
+56.063GQSEDPGSLLSLFR	tr|J3KPF3|J3KPF3_HUMAN;tr|F5GZS6|F5GZS6_HUMAN;tr|F5GZI0|F5GZI0_HUMAN;sp|P08195|4F2_HUMAN;sp|P08195-2|4F2_HUMAN;sp|P08195-3|4F2_HUMAN;sp|P08195-4|4F2_HUMAN	849341	730970	955899	469458	636824	260268	0.00616419	FALSE
+56.063AQTYELQESNVQLK+56.063	tr|B5ME97|B5ME97_HUMAN;tr|E7EX04|E7EX04_HUMAN;tr|E7EW69|E7EW69_HUMAN;sp|Q9P0V9|SEP10_HUMAN;sp|Q9P0V9-2|SEP10_HUMAN;sp|Q9P0V9-3|SEP10_HUMAN	14006837	50234.1	0	131290	30077.1	0	0.00482955	FALSE
+56.063VQAGAYPTEK+56.063	tr|H0YJ17|H0YJ17_HUMAN;tr|G3V4G1|G3V4G1_HUMAN;sp|Q8NEJ9|NGDN_HUMAN;sp|Q8NEJ9-2|NGDN_HUMAN	3.61647e+06	1.40662e+06	787418	1.73214e+06	362633	1.07171e+06	0.00237389	FALSE
+56.063LAQAAQSSVATITR	sp|Q9Y490|TLN1_HUMAN	4913229	3.15662e+06	3004544	3.36077e+06	0	0	0.00293083	FALSE
+56.063AGPVAVQVK+56.063	tr|E7ETY2|E7ETY2_HUMAN;tr|H0Y8Y7|H0Y8Y7_HUMAN;tr|A0A3B3IS06|A0A3B3IS06_HUMAN;tr|J3KQ96|J3KQ96_HUMAN;sp|Q13428|TCOF_HUMAN;sp|Q13428-2|TCOF_HUMAN;sp|Q13428-3|TCOF_HUMAN;sp|Q13428-4|TCOF_HUMAN;sp|Q13428-5|TCOF_HUMAN;sp|Q13428-6|TCOF_HUMAN;sp|Q13428-7|TCOF_HUMAN;sp|Q13428-8|TCOF_HUMAN	3.65658e+06	896248	104338	923843	152840	518388	0	FALSE
+56.063EVTVPVFYPTEK+56.063	sp|P43121|MUC18_HUMAN;sp|P43121-2|MUC18_HUMAN	645538	331363	361363	398113	203961	491744	0	FALSE
+56.063NSSYFVEWIPNNVK+56.063	tr|Q5ST81|Q5ST81_HUMAN;tr|Q5JP53|Q5JP53_HUMAN;tr|K7ESM5|K7ESM5_HUMAN;tr|A0A0B4J269|A0A0B4J269_HUMAN;sp|Q9BUF5|TBB6_HUMAN;sp|P04350|TBB4A_HUMAN;sp|P07437|TBB5_HUMAN;sp|Q13885|TBB2A_HUMAN;sp|Q13509|TBB3_HUMAN;sp|Q13509-2|TBB3_HUMAN;sp|P68371|TBB4B_HUMAN;sp|Q9BVA1|TBB2B_HUMAN	0	571802	515422	759063	170275	0	0.00237389	FALSE
+56.063VTDALNATR	sp|P10809|CH60_HUMAN	4755263	2201613	126089	2.47456e+06	288414	1.39945e+06	0.00237389	FALSE
+56.063ELAQQIQK+56.063	tr|E7EQG2|E7EQG2_HUMAN;tr|J3KT12|J3KT12_HUMAN;tr|J3QL43|J3QL43_HUMAN;tr|J3QLN6|J3QLN6_HUMAN;tr|J3KSN7|J3KSN7_HUMAN;tr|J3QKZ9|J3QKZ9_HUMAN;tr|J3QR64|J3QR64_HUMAN;tr|J3KS25|J3KS25_HUMAN;tr|J3KTB5|J3KTB5_HUMAN;sp|Q14240|IF4A2_HUMAN;sp|Q14240-2|IF4A2_HUMAN;sp|P60842|IF4A1_HUMAN;sp|P60842-2|IF4A1_HUMAN	3.86402e+06	1762052	4440.74	1.96859e+06	0.488176	1.28937e+06	0.00616419	FALSE
+56.063STGGAPTFNVTVTK+56.063	tr|K7EJ44|K7EJ44_HUMAN;sp|P07737|PROF1_HUMAN	5387640	4.15067e+06	3.82756e+06	4.45164e+06	2.61311e+06	4257589	0.00145402	FALSE
+56.063YIDQEELNK+56.063	sp|P07900|HS90A_HUMAN;sp|P07900-2|HS90A_HUMAN;sp|Q14568|HS902_HUMAN;sp|P08238|HS90B_HUMAN;sp|Q58FF8|H90B2_HUMAN	13124103	6.64835e+06	243460	1.6712e+06	188873	391116	0.000789266	FALSE
+56.063VAPPGLTQIPQIQK+56.063	tr|V9GYR2|V9GYR2_HUMAN;sp|P05026|AT1B1_HUMAN;sp|P05026-2|AT1B1_HUMAN	12846223	6.2663e+06	832873	6011629	2.02218e+06	2.73422e+06	0.00616419	FALSE
+56.063IVTVVPQDTK+56.063	tr|F5H2T0|F5H2T0_HUMAN;sp|O95163|ELP1_HUMAN	11510212	4892721	968290	5781182	4295221	4752232	0.00237389	FALSE
+56.063NAVTQEFGPVPDTAR	tr|A2A274|A2A274_HUMAN;sp|Q99798|ACON_HUMAN	4.10432e+06	1.93595e+06	900330	1.26953e+06	794100	1.10139e+06	0.00237389	FALSE
+56.063IVEMSTSK+56.063	tr|I3L397|I3L397_HUMAN;tr|C9J4W5|C9J4W5_HUMAN;tr|F8WCJ1|F8WCJ1_HUMAN;tr|C9J7B5|C9J7B5_HUMAN;tr|I3L504|I3L504_HUMAN;sp|P63241|IF5A1_HUMAN;sp|P63241-2|IF5A1_HUMAN;sp|Q9GZV4|IF5A2_HUMAN	3.97944e+06	2.29413e+06	4908295	2.35459e+06	245639	2.65834e+06	0.00237389	FALSE
+56.063VEAQLQELQVK+56.063	sp|P35579|MYH9_HUMAN	6.30609e+06	5448349	0	4868311	0	6066271	0.00293083	FALSE
+56.063SSIVM+15.995GEPISQSSSNSQ	sp|Q8TCS8|PNPT1_HUMAN	14483710	7528068	2110585	7.55155e+06	1.56958e+06	2734448	0.00237389	FALSE
+56.063SQSAAVTPSSTTSSTR	tr|A0A087WX59|A0A087WX59_HUMAN;sp|Q16186|ADRM1_HUMAN	181199	67707.9	38530.3	49607.1	33420.6	100447	0.00616419	FALSE
+56.063SNVSDAVAQSTR	sp|P60174|TPIS_HUMAN;sp|P60174-1|TPIS_HUMAN;sp|P60174-4|TPIS_HUMAN	8411073	5384484	1187140	2.91007e+06	995602	1300856	0.00293083	FALSE
+56.063IM+15.995ATPEQVGK+56.063	tr|B1AHC9|B1AHC9_HUMAN;sp|P12956|XRCC6_HUMAN;sp|P12956-2|XRCC6_HUMAN	9603220	4.3586e+06	439389	4.29675e+06	1.11723e+06	3.22589e+06	0	FALSE
+56.063SC+57.021GSSTPDEFPTDIPGTK+56.063	tr|H7BZU1|H7BZU1_HUMAN;sp|P41091|IF2G_HUMAN	23788144	11323829	932414	14827380	1.56689e+06	4.20032e+06	0	FALSE
+56.063QAASSLQQASLK+56.063	sp|P38646|GRP75_HUMAN	9010402	4.35022e+06	602562	4.66477e+06	613026	3.12754e+06	0	FALSE
+56.063AIADTGANVVVTGGK+56.063	tr|H7C4C8|H7C4C8_HUMAN;sp|P50990|TCPQ_HUMAN;sp|P50990-2|TCPQ_HUMAN;sp|P50990-3|TCPQ_HUMAN	10534792	6.282e+06	4517604	5528837	1.29408e+06	2.72612e+06	0.00237389	FALSE
+56.063QLTK+56.063AM+15.995M+15.995RK+56.063	tr|Q96DC0|Q96DC0_HUMAN;tr|H3BS70|H3BS70_HUMAN;sp|P42126|ECI1_HUMAN;sp|P42126-2|ECI1_HUMAN	3.09166e+06	148602	7.3434	0	0	0	0.00293083	FALSE
+56.063DGYQQNFK+56.063	tr|G3V153|G3V153_HUMAN;sp|Q14444|CAPR1_HUMAN;sp|Q14444-2|CAPR1_HUMAN	11911587	1.54575e+06	430895	5580398	891497	4.00691e+06	0	FALSE
+56.063DLTDYLMK+56.063	tr|I3L4N8|I3L4N8_HUMAN;tr|I3L1U9|I3L1U9_HUMAN;tr|I3L3I0|I3L3I0_HUMAN;tr|A0A2R8Y793|A0A2R8Y793_HUMAN;tr|A0A2R8YEA7|A0A2R8YEA7_HUMAN;sp|P63261|ACTG_HUMAN;sp|Q562R1|ACTBL_HUMAN;sp|P68133|ACTS_HUMAN;sp|P60709|ACTB_HUMAN;sp|P68032|ACTC_HUMAN;sp|P63267|ACTH_HUMAN;sp|P63267-2|ACTH_HUMAN;sp|P62736|ACTA_HUMAN	9108676	9991226	8.35375e+06	12844973	7.61216e+06	3.59868e+06	0.00431282	FALSE
+56.063ESTGNM+15.995VTGQTVC+57.021K+56.063	tr|E7EN77|E7EN77_HUMAN;sp|Q15021|CND1_HUMAN	1.98571e+06	907539	62681.2	2218066	539026	356393	0.00237389	FALSE
+56.063AVDSQILPK+56.063	sp|Q02878|RL6_HUMAN	18899196	8388450	713540	949756	0	495855	0.00145402	FALSE
+56.063GGIPNVEGAAK+56.063	sp|Q9BVP2|GNL3_HUMAN;sp|Q9BVP2-2|GNL3_HUMAN	21966150	15656793	8455166	2784901	579638	1.92002e+06	0	FALSE
+56.063IQPALQEK+56.063	tr|H3BPF6|H3BPF6_HUMAN;tr|H3BMQ1|H3BMQ1_HUMAN;sp|Q99471|PFD5_HUMAN;sp|Q99471-3|PFD5_HUMAN	6.49681e+06	3056413	262355	3.71669e+06	1.32417e+06	1.81265e+06	0.00668896	FALSE
+56.063LVAGEM+15.995GQNEPDQGGQR	tr|Q5H928|Q5H928_HUMAN;sp|Q99714|HCD2_HUMAN;sp|Q99714-2|HCD2_HUMAN	1.64271e+06	772047	51687.8	869421	125375	636747	0.00145402	FALSE
+56.063QVLVAPGNAGTAC+57.021SEK+56.063	tr|C9JKQ7|C9JKQ7_HUMAN;tr|C9JZG2|C9JZG2_HUMAN;tr|C9JBJ1|C9JBJ1_HUMAN;tr|C9JTV6|C9JTV6_HUMAN;tr|F8WD69|F8WD69_HUMAN;sp|P22102|PUR2_HUMAN;sp|P22102-2|PUR2_HUMAN	495829	857823	446432	367824	333330	3.50346e+06	0.00378017	FALSE
+56.063VANVSAAEDSVSQR	tr|G3V0G3|G3V0G3_HUMAN;tr|H7C3E9|H7C3E9_HUMAN;tr|F8WDT8|F8WDT8_HUMAN;sp|Q9NY93|DDX56_HUMAN;sp|Q9NY93-2|DDX56_HUMAN	5352905	4194362	819178	2.18958e+06	704355	838113	0.00145402	FALSE
+56.063SNYNFEK+56.063PFLWLAR	tr|B5MDF5|B5MDF5_HUMAN;tr|B4DV51|B4DV51_HUMAN;tr|F5H018|F5H018_HUMAN;tr|J3KQE5|J3KQE5_HUMAN;sp|P62826|RAN_HUMAN	1.41257e+06	856731	0	1.07429e+06	0	504865	0.000399521	FALSE
+56.063QAQIEVVPSASALIIK+56.063	sp|P30050|RL12_HUMAN	19658804	9584743	890296	10855574	1.95295e+06	4999979	0	FALSE
+56.063QEYDESGPSIVHRK+56.063	tr|A0A2R8YFE2|A0A2R8YFE2_HUMAN;sp|P0CG38|POTEI_HUMAN;sp|A5A3E0|POTEF_HUMAN;sp|P63261|ACTG_HUMAN;sp|Q9BYX7|ACTBM_HUMAN;sp|P60709|ACTB_HUMAN;sp|P0CG39|POTEJ_HUMAN;sp|Q6S8J3|POTEE_HUMAN	54234.5	26686.9	13974.5	21898	55692.3	10985.9	0.00431282	FALSE
+56.063TTPEC+57.021GPTGYVEK+56.063	sp|O76095|JTB_HUMAN;sp|O76095-2|JTB_HUMAN	64786504	22638500	1993021	27822050	8281475	2173361	0.00482955	FALSE
+56.063MRPEGGPRRRR	tr|H0Y7Y4|H0Y7Y4_HUMAN	215023008	41733564	92575920	3.60906e+06	0	135317	0.00723428	FALSE
+56.063GGTILAPTVSAK+56.063	tr|A0A0C4DG89|A0A0C4DG89_HUMAN;sp|Q7L014|DDX46_HUMAN	2.22995e+06	1.58304e+06	0	2.00321e+06	0	1.76196e+06	0.00668896	FALSE
+56.063VAGTQAC+57.021ATETIDTSR	sp|Q9BRR6|ADPGK_HUMAN;sp|Q9BRR6-2|ADPGK_HUMAN;sp|Q9BRR6-3|ADPGK_HUMAN;sp|Q9BRR6-4|ADPGK_HUMAN	1.40884e+06	1.39898e+06	1.22098e+06	842796	789593	0	0.00237389	FALSE
+56.063AGEAPTENPAPPTQQSSAE	sp|P16989|YBOX3_HUMAN;sp|P16989-2|YBOX3_HUMAN	184582560	114741208	8656243	94625936	21100722	40175044	0.00431282	FALSE
+56.063IVVPPLPGK+56.063	tr|A0A087X0R6|A0A087X0R6_HUMAN;sp|Q9UMY4|SNX12_HUMAN;sp|Q9UMY4-2|SNX12_HUMAN;sp|Q9UMY4-3|SNX12_HUMAN	482619	493148	0	221341	0	148958	0.00482955	FALSE
+56.063C+57.021C+57.021FVYQLHLVR	XXX_tr|F8VWZ8|F8VWZ8_HUMAN	46294780	4901334	17976906	0	2.68594e+06	1351503	0.00217391	TRUE
+56.063SQPAASTLESK+56.063	sp|P46013|KI67_HUMAN;sp|P46013-2|KI67_HUMAN	1042046	442472	579544	1.10435e+06	67089.9	226209	0.00482955	FALSE
+56.063NQALFPAC+57.021VLK+56.063	tr|A0A087X2G1|A0A087X2G1_HUMAN;tr|F1T0B3|F1T0B3_HUMAN;sp|Q92499|DDX1_HUMAN;sp|Q92499-2|DDX1_HUMAN;sp|Q92499-3|DDX1_HUMAN	3560033	3030016	3.8705e+06	3.67242e+06	0	0	0.00145402	FALSE
+56.063AAVENLPTFLVELSR	tr|J3QR48|J3QR48_HUMAN;sp|Q14974|IMB1_HUMAN	345511	383994	216383	345956	193291	199058	0.00237389	FALSE
+56.063IDGATQSSPAEPK+56.063	sp|Q32MZ4|LRRF1_HUMAN;sp|Q32MZ4-2|LRRF1_HUMAN;sp|Q32MZ4-3|LRRF1_HUMAN	795983	427904	147344	395160	165809	193224	0.00482955	FALSE
+56.063LGSTEVASNVPK+56.063	tr|S4R3V3|S4R3V3_HUMAN;sp|Q9Y5A9|YTHD2_HUMAN;sp|Q9Y5A9-2|YTHD2_HUMAN	811497	718096	430664	602674	0	186434	0.00668896	FALSE
+56.063QQAAYYAQTSPQGM+15.995PQHPPAPQGQ	sp|Q96AE4|FUBP1_HUMAN	4784571	2.18716e+06	2710895	1.27107e+06	1.50144e+06	1.41778e+06	0.00482955	FALSE
+56.063TFC+57.021QLILDPIFK+56.063	sp|P13639|EF2_HUMAN	1.45398e+06	475487	0	1.21673e+06	0	0	0.00237389	FALSE
+56.063IGPYQPNVPVGIDYVIPK+56.063	tr|A8MXP9|A8MXP9_HUMAN;tr|A0A0R4J2E8|A0A0R4J2E8_HUMAN;tr|B3KM87|B3KM87_HUMAN;tr|Q68E03|Q68E03_HUMAN;sp|P43243|MATR3_HUMAN;sp|P43243-2|MATR3_HUMAN	1.04685e+06	568084	0	577922	0	573144	0.00830795	FALSE
+56.063TQPMTAQAASYR	sp|Q96PK6|RBM14_HUMAN	6909648	4.056e+06	896704	2.98868e+06	466660	1.30319e+06	0	FALSE
+56.063M+15.995DPNC+57.021SC+57.021EAGGSC+57.021AC+57.021AGSC+57.021K+56.063	tr|H3BTC4|H3BTC4_HUMAN;sp|P80294|MT1H_HUMAN	85293672	43860772	42758008	6937122	0	0	0.00830795	FALSE
+56.063QTYSTEPNNLK+56.063	tr|H0YLP6|H0YLP6_HUMAN;tr|H0YKD8|H0YKD8_HUMAN;tr|H0YMF4|H0YMF4_HUMAN;sp|P46779|RL28_HUMAN;sp|P46779-2|RL28_HUMAN;sp|P46779-3|RL28_HUMAN;sp|P46779-4|RL28_HUMAN;sp|P46779-5|RL28_HUMAN	2.65704e+06	1836050	5.39428e+06	6.24604e+06	2.80397e+06	2.56441e+06	0.00145402	FALSE
+56.063AELIVQPELK+56.063	sp|P15924|DESP_HUMAN;sp|P15924-2|DESP_HUMAN;sp|P15924-3|DESP_HUMAN	5578841	2264502	664165	2.69522e+06	560820	1.03297e+06	0.00145402	FALSE
+56.063ADVVVSGPK+56.063	sp|Q09666|AHNK_HUMAN	20140392	2.25946e+06	1.99083e+06	1.37799e+06	690933	115212	0.00237389	FALSE
+56.063VISELNGK+56.063NIEDVIAQGIGK+56.063	sp|P05387|RLA2_HUMAN	496680	802802	0	59399.3	0	0	0.00884222	FALSE
+56.063NYLPAINGIVFLVDC+57.021ADHSR	tr|Q5SQT8|Q5SQT8_HUMAN;sp|Q9NR31|SAR1A_HUMAN;sp|Q9NR31-2|SAR1A_HUMAN	306488	146286	93351.6	125890	39914.5	69939	0.00378017	FALSE
+56.063EGALGWAPAAPPPLK+56.063	sp|Q96IU2|ZBED3_HUMAN	84490576	0	6935330	14184713	10908285	6.69369e+06	0.00830795	FALSE
+56.063EITALAPSTM+15.995K+56.063	tr|A0A2R8YFE2|A0A2R8YFE2_HUMAN;tr|A6NL76|A6NL76_HUMAN;sp|P63261|ACTG_HUMAN;sp|P68133|ACTS_HUMAN;sp|P60709|ACTB_HUMAN;sp|P68032|ACTC_HUMAN;sp|P63267|ACTH_HUMAN;sp|P63267-2|ACTH_HUMAN;sp|P62736|ACTA_HUMAN	6.26507e+06	1.89896e+06	3.50186e+06	3.8365e+06	9465353	6.29314e+06	0.00237389	FALSE
+56.063LQPAYQVTLPGQEPIVK+56.063	tr|A0A087X1L6|A0A087X1L6_HUMAN;sp|P41214|EIF2D_HUMAN;sp|P41214-2|EIF2D_HUMAN	448499	321308	0	397549	0	273123	0.00482955	FALSE
+56.063TATESFASDPILYRPVAVALDTK+56.063	tr|H3BQ34|H3BQ34_HUMAN;tr|H3BTJ2|H3BTJ2_HUMAN;tr|H3BT25|H3BT25_HUMAN;tr|H3BTN5|H3BTN5_HUMAN;tr|H3BUW1|H3BUW1_HUMAN;sp|P14618|KPYM_HUMAN;sp|P14618-2|KPYM_HUMAN;sp|P14618-3|KPYM_HUMAN	265426	163353	0	154795	78349.6	0	0.00830795	FALSE
+56.063AQAAAPASVPAQAPK+56.063	tr|A0A3B3ITT5|A0A3B3ITT5_HUMAN;sp|P47914|RL29_HUMAN	136433	135351	68421.6	161621	61930.1	83891.5	0.00910345	FALSE
+56.063EALPAPSDDATALMTDPK+56.063	tr|A0A2R8Y6B6|A0A2R8Y6B6_HUMAN;tr|A0A087WUQ6|A0A087WUQ6_HUMAN;sp|P07203|GPX1_HUMAN	10731640	3.81203e+06	1.53522e+06	4.32687e+06	0	475160	0.00237389	FALSE
+56.063VSADAAPDC+57.021PETSNQTPPGPGAAAGPGID	sp|Q9NXH9|TRM1_HUMAN;sp|Q9NXH9-2|TRM1_HUMAN	43675508	22176646	6017226	21834988	5.22854e+06	8.36539e+06	0	FALSE
+56.063TPSTMENDSSNLDPSQAPSLAQPLVFSNSK+56.063	tr|Q5VU77|Q5VU77_HUMAN;tr|F8W726|F8W726_HUMAN;sp|Q14157|UBP2L_HUMAN;sp|Q14157-1|UBP2L_HUMAN;sp|Q14157-3|UBP2L_HUMAN;sp|Q14157-4|UBP2L_HUMAN;sp|Q14157-5|UBP2L_HUMAN	3676107	3.80927e+06	0	3.32747e+06	0	0	0.00431282	FALSE
+56.063QQAAYYAQTSPQGMPQHPPAPQGQ	sp|Q96AE4|FUBP1_HUMAN	27417656	16482479	2.60435e+06	17851614	3.47361e+06	6046601	0	FALSE
+56.063TQYSC+57.021YC+57.021C+57.021K+56.063	tr|H7BYK1|H7BYK1_HUMAN;sp|Q9UGI8|TES_HUMAN;sp|Q9UGI8-2|TES_HUMAN	2.02806e+06	562293	569361	1.04449e+06	636796	551634	0	FALSE
+56.063AM+15.995GIM+15.995NSFVNDIFER	tr|U3KQK0|U3KQK0_HUMAN;sp|Q99877|H2B1N_HUMAN;sp|P23527|H2B1O_HUMAN;sp|P57053|H2BFS_HUMAN;sp|P62807|H2B1C_HUMAN;sp|P58876|H2B1D_HUMAN;sp|Q5QNW6|H2B2F_HUMAN;sp|Q5QNW6-2|H2B2F_HUMAN;sp|P06899|H2B1J_HUMAN;sp|O60814|H2B1K_HUMAN;sp|Q16778|H2B2E_HUMAN;sp|Q93079|H2B1H_HUMAN;sp|Q8N257|H2B3B_HUMAN;sp|P33778|H2B1B_HUMAN;sp|Q99880|H2B1L_HUMAN;sp|Q99879|H2B1M_HUMAN	1.38804e+06	374997	1120007	668762	707525	601549	0.00830795	FALSE
+56.063DGSDVIYPAR	tr|M0R080|M0R080_HUMAN;sp|P25685|DNJB1_HUMAN;sp|P25685-2|DNJB1_HUMAN	3965267	1.95933e+06	729461	1.64726e+06	73079.8	786814	0.00237389	FALSE
+56.063GTC+57.021VEGTIPK+56.063	tr|H3BND8|H3BND8_HUMAN;tr|F5H2X1|F5H2X1_HUMAN;sp|Q93009|UBP7_HUMAN;sp|Q93009-3|UBP7_HUMAN	5834170	3.83748e+06	1.84877e+06	3746087	1.30651e+06	2.93526e+06	0	FALSE
+56.063NSM+15.995PASSFQQQK+56.063	tr|B8ZZ10|B8ZZ10_HUMAN;tr|A8MYV2|A8MYV2_HUMAN;tr|A0A0A6YYJ8|A0A0A6YYJ8_HUMAN;sp|Q96HJ9-2|FMC1_HUMAN;sp|Q9NQ29|LUC7L_HUMAN;sp|Q9NQ29-2|LUC7L_HUMAN;sp|Q9NQ29-3|LUC7L_HUMAN;sp|Q9Y383|LC7L2_HUMAN;sp|Q9Y383-2|LC7L2_HUMAN;sp|Q9Y383-3|LC7L2_HUMAN	834596	399335	6465.64	508233	114604	477594	0.00910345	FALSE
+56.063SAAQAAAQTNSNAAGK+56.063	sp|Q8NC51|PAIRB_HUMAN;sp|Q8NC51-2|PAIRB_HUMAN;sp|Q8NC51-3|PAIRB_HUMAN;sp|Q8NC51-4|PAIRB_HUMAN	753808	370956	42202.8	405174	61650.3	171269	0	FALSE
+56.063TLTLVDTGIGMTK+56.063	sp|P08238|HS90B_HUMAN	2268981	1.79458e+06	1.16475e+06	1.28188e+06	1.42547e+06	887729	0.00536572	FALSE
+56.063TLTIVDTGIGMTK+56.063	tr|G3V2J8|G3V2J8_HUMAN;sp|P07900|HS90A_HUMAN;sp|P07900-2|HS90A_HUMAN;sp|Q58FG1|HS904_HUMAN	2268981	1.79458e+06	1.16475e+06	1.28188e+06	1.42547e+06	887729	0.00536572	FALSE
+56.063QSSSTNYTNELK+56.063	tr|F8VRN8|F8VRN8_HUMAN;tr|F8VQE1|F8VQE1_HUMAN;sp|Q9UHB6|LIMA1_HUMAN;sp|Q9UHB6-2|LIMA1_HUMAN;sp|Q9UHB6-4|LIMA1_HUMAN;sp|Q9UHB6-5|LIMA1_HUMAN	5.21455e+06	2583296	164662	2.55357e+06	1.05947e+06	2.11453e+06	0.000399521	FALSE
+56.063DGDFENPVPYTGAVK+56.063	tr|F8VY02|F8VY02_HUMAN;sp|P30040|ERP29_HUMAN	23067378	6996517	6274109	12989935	2250778	7024508	0.00431282	FALSE
+56.063VSADAAPDC+57.021PETSNQTPPGPGAAAGPGID	sp|Q9NXH9|TRM1_HUMAN;sp|Q9NXH9-2|TRM1_HUMAN	44092716	23295472	6.0455e+06	20721200	5181782	8540720	0	FALSE
+56.063QQAAYYGQTPGPGGPQPPPTQQGQQQAQ	tr|M0R3J3|M0R3J3_HUMAN;sp|Q92945|FUBP2_HUMAN	14716715	7.35722e+06	1.85479e+06	7.27273e+06	1.61235e+06	1.17898e+06	0	FALSE
+56.063FSTPEQAAK+56.063	tr|M0QXS5|M0QXS5_HUMAN;tr|A0A3B3ITJ4|A0A3B3ITJ4_HUMAN;tr|M0QYT0|M0QYT0_HUMAN;sp|P14866|HNRPL_HUMAN;sp|P14866-2|HNRPL_HUMAN	1.24758e+06	1.05564e+06	349613	1.26626e+06	359315	598349	0.00431282	FALSE
+56.063STVNC+57.021STTPVAER	tr|I3L245|I3L245_HUMAN;tr|J3KMX1|J3KMX1_HUMAN;sp|Q99567|NUP88_HUMAN	925582	275099	100430	795454	819659	229798	0.00378017	FALSE
+56.063GIFPVLC+57.021K+56.063DPVQEAWAEDVDLR	tr|B4DNK4|B4DNK4_HUMAN;tr|H3BR70|H3BR70_HUMAN;sp|P14618|KPYM_HUMAN;sp|P14618-2|KPYM_HUMAN;sp|P14618-3|KPYM_HUMAN	580778	455287	365809	459442	0	124564	0.00431282	FALSE
+56.063VSADAAPDC+57.021PETSNQTPPGPGAAAGPGID	sp|Q9NXH9|TRM1_HUMAN;sp|Q9NXH9-2|TRM1_HUMAN	44572468	23272772	6.36247e+06	20838100	5.21636e+06	8489643	0	FALSE
+56.063LVINGNPITIFQERDPSK+56.063	sp|P04406|G3P_HUMAN;sp|P04406-2|G3P_HUMAN	30400680	28935362	31926368	54428376	4547197	49417184	0.00536572	FALSE
+56.063TPPYADPSLQAPVR	tr|Q2TAM5|Q2TAM5_HUMAN;tr|E9PKH5|E9PKH5_HUMAN;tr|A0A087X0W8|A0A087X0W8_HUMAN;sp|Q04206|TF65_HUMAN;sp|Q04206-2|TF65_HUMAN;sp|Q04206-3|TF65_HUMAN;sp|Q04206-4|TF65_HUMAN	14487681	641874	16145151	4080671	2.97011e+06	2.75668e+06	0.00536572	FALSE
+56.063GC+57.021EVVVSGK+56.063	tr|H0YEU2|H0YEU2_HUMAN;tr|E9PL09|E9PL09_HUMAN;tr|E9PSF4|E9PSF4_HUMAN;tr|E9PJN9|E9PJN9_HUMAN;sp|P23396|RS3_HUMAN;sp|P23396-2|RS3_HUMAN	2.23211e+06	712233	543626	951588	0	1.72456e+06	0.00145402	FALSE
+56.063NGTGVLILSPTR	sp|Q9NVP1|DDX18_HUMAN	7.69345e+06	6.45564e+06	4.92103e+06	5.48436e+06	1309477	20258766	0	FALSE
+56.063EAEEEQQK+56.063K+56.063	XXX_tr|E7EW20|E7EW20_HUMAN;XXX_tr|A0A0A0MRM8|A0A0A0MRM8_HUMAN;XXX_tr|A0A0D9SGC1|A0A0D9SGC1_HUMAN;XXX_sp|Q9UM54|MYO6_HUMAN;XXX_sp|Q9UM54-1|MYO6_HUMAN;XXX_sp|Q9UM54-2|MYO6_HUMAN;XXX_sp|Q9UM54-4|MYO6_HUMAN;XXX_sp|Q9UM54-5|MYO6_HUMAN;XXX_sp|Q9UM54-6|MYO6_HUMAN	663237	0	0	0	0	0	0.00988197	TRUE
+56.063AQQVAVQEQEIAR	tr|A2AB09|A2AB09_HUMAN;tr|A0A140T9W4|A0A140T9W4_HUMAN;tr|A0A140T907|A0A140T907_HUMAN;tr|A0A140T9X0|A0A140T9X0_HUMAN;tr|A0A140T9R1|A0A140T9R1_HUMAN;sp|O75955|FLOT1_HUMAN;sp|O75955-2|FLOT1_HUMAN	1.10038e+06	627691	254584	591049	198446	292661	0.00145402	FALSE
+56.063AGEAPTENPAPPTQQSSAE	sp|P16989|YBOX3_HUMAN;sp|P16989-2|YBOX3_HUMAN	194914736	97911048	11416923	92868608	20940382	39606140	0.00536572	FALSE
+56.063M+15.995LQPC+57.021GPPADK+56.063PEEN	sp|Q9BWJ5|SF3B5_HUMAN	2.7425e+06	1.2606e+06	392345	997954	313540	411435	0.00431282	FALSE
+56.063GAAAAAAASGAAGGGGGGAGAGAPGGGR	sp|Q68E01|INT3_HUMAN;sp|Q68E01-2|INT3_HUMAN	331307	351544	0	365815	84800.8	272868	0.00431282	FALSE
+56.063VAPAPAVVK+56.063	tr|Q5T8U3|Q5T8U3_HUMAN;sp|P62424|RL7A_HUMAN	461829280	235735696	27072994	243864736	46190204	131635264	0	FALSE
+56.063VIDDTNITR	tr|F8VZY9|F8VZY9_HUMAN;sp|P05783|K1C18_HUMAN	3188928	1.26831e+06	667268	1.39073e+06	123251	993259	0.00378017	FALSE
+56.063APLATGEDDDDEVPDLVENFDEASK+56.063NEAN	sp|P20290|BTF3_HUMAN;sp|P20290-2|BTF3_HUMAN	732585	535485	0	429848	0	452947	0.00237389	FALSE
+56.063GDVTAEEAAGASPAK+56.063	sp|P49006|MRP_HUMAN	3.34114e+06	1.53228e+06	222590	1.77378e+06	151259	581257	0	FALSE
+56.063IEANEALVK+56.063	sp|P30049|ATPD_HUMAN	13089100	5.95408e+06	2.09075e+06	9557519	3231507	5063861	0.00563222	FALSE
+56.063LQAEEVAQQK+56.063	sp|Q15149|PLEC_HUMAN;sp|Q15149-2|PLEC_HUMAN;sp|Q15149-3|PLEC_HUMAN;sp|Q15149-4|PLEC_HUMAN;sp|Q15149-5|PLEC_HUMAN;sp|Q15149-6|PLEC_HUMAN;sp|Q15149-7|PLEC_HUMAN;sp|Q15149-8|PLEC_HUMAN;sp|Q15149-9|PLEC_HUMAN	17784286	8.27799e+06	637437	8842660	1.37069e+06	4.44576e+06	0	FALSE
+56.063GSVGAVPSGTSPGGVATTAAAGSR	sp|Q6ZNB6|NFXL1_HUMAN;sp|Q6ZNB6-2|NFXL1_HUMAN	3308415	11010994	3416505	3935480	1.323e+06	682949	0.00457928	FALSE
+56.063AASAATAAPTATPAAQESGTIPK+56.063	tr|B8ZZ81|B8ZZ81_HUMAN;sp|O00116|ADAS_HUMAN	45553000	26405838	9637923	33231338	12024820	18033376	0	FALSE
+56.063QQAAYYAQTSPQGMPQHPPAPQGQ	sp|Q96AE4|FUBP1_HUMAN	27611390	17226906	2.29852e+06	18029316	3.08544e+06	6317520	0	FALSE
+56.063ASPAGTAGGPGAGAAAGGTGPLAAR	sp|Q12962|TAF10_HUMAN	15576508	0	2.56863e+06	2.65323e+06	0	1.9533e+06	0.00237389	FALSE
+56.063SPVGM+15.995LDLSSWSSPEVLR	sp|O95613|PCNT_HUMAN;sp|O95613-2|PCNT_HUMAN	35970484	0	348588	494148	805214	182902	0.00457928	FALSE
+56.063IPSAVGYQPTLATDM+15.995GTM+15.995QER	tr|F8W0P7|F8W0P7_HUMAN;tr|F8W079|F8W079_HUMAN;tr|H0YH81|H0YH81_HUMAN;tr|H0YI37|H0YI37_HUMAN;sp|P06576|ATPB_HUMAN	7366810	3.62348e+06	900228	2.98421e+06	857313	2.26981e+06	0.000789266	FALSE
+56.063IGPYQPNVPVGIDYVIPK+56.063	tr|A8MXP9|A8MXP9_HUMAN;tr|A0A0R4J2E8|A0A0R4J2E8_HUMAN;tr|B3KM87|B3KM87_HUMAN;tr|Q68E03|Q68E03_HUMAN;sp|P43243|MATR3_HUMAN;sp|P43243-2|MATR3_HUMAN	3.30754e+06	1.34134e+06	1.04585e+06	1.12587e+06	1105682	580286	0.00378017	FALSE
+56.063FIPLSEPAPVPPIPNEQQLAR	tr|H7C3S9|H7C3S9_HUMAN;tr|E9PGT6|E9PGT6_HUMAN;sp|Q99627|CSN8_HUMAN;sp|Q99627-2|CSN8_HUMAN	279201	25099.1	0	251990	0	0	0.00237389	FALSE
+56.063AAPQSPSVPK+56.063	tr|E9PF10|E9PF10_HUMAN;sp|O75694|NU155_HUMAN;sp|O75694-2|NU155_HUMAN	11257893	5.45386e+06	1346224	6.24608e+06	1.05055e+06	3493955	0.000399521	FALSE
+56.063VASVSQNAIVSAAGNIAR	tr|E9PF10|E9PF10_HUMAN;sp|O75694|NU155_HUMAN;sp|O75694-2|NU155_HUMAN	830458	436255	717601	28825.4	29125	1.20305e+06	0.00378017	FALSE
+56.063TTANAIYC+57.021PPK+56.063	tr|J3QS13|J3QS13_HUMAN;sp|O00231|PSD11_HUMAN;sp|O00231-2|PSD11_HUMAN	1.79793e+06	931900	439210	1.28852e+06	825518	1.22454e+06	0.00457928	FALSE
+56.063ISLGLPVGAVINC+57.021ADNTGAK+56.063	tr|C9JD32|C9JD32_HUMAN;tr|B9ZVP7|B9ZVP7_HUMAN;tr|J3KT29|J3KT29_HUMAN;sp|P62829|RL23_HUMAN	3279910	1.44474e+06	402090	1.21588e+06	619713	2697086	0.00237389	FALSE
+56.063VNQIGSVTESLQAC+57.021K+56.063	tr|A0A2R8Y6G6|A0A2R8Y6G6_HUMAN;sp|P06733|ENOA_HUMAN;sp|P06733-2|ENOA_HUMAN	107312	68743	46449.1	29848.4	31276.8	34125.4	0.00457928	FALSE
+56.063VNQIGSVTESIQAC+57.021K+56.063	sp|P13929|ENOB_HUMAN;sp|P13929-2|ENOB_HUMAN;sp|P13929-3|ENOB_HUMAN	107312	68743	46449.1	29848.4	31276.8	34125.4	0.00457928	FALSE
+56.063C+57.021ELLYEGPPDDEAAM+15.995GIK+56.063	sp|P13639|EF2_HUMAN	1.77754e+06	0	0	0	1.14023e+06	0	0.00431282	FALSE
+56.063ILATPPQEDAPSVDIANIR	tr|A0A0B4J1R6|A0A0B4J1R6_HUMAN;tr|E9PFF2|E9PFF2_HUMAN;sp|P29401|TKT_HUMAN;sp|P29401-2|TKT_HUMAN	11772451	33186452	3.81204e+06	26672298	3.42938e+06	12472155	0	FALSE
+56.063TATQLAVNK+56.063	tr|F8WAM2|F8WAM2_HUMAN;sp|Q99832|TCPH_HUMAN;sp|Q99832-3|TCPH_HUMAN;sp|Q99832-4|TCPH_HUMAN	17813912	8742835	761475	10412098	1.051e+06	4923782	0	FALSE
+56.063TAVAPSAVNLADPR	sp|Q9UQ35|SRRM2_HUMAN	12787699	7.02623e+06	645301	7069123	1.19931e+06	2684010	0	FALSE
+56.063DFSPSGIFGAFQR	tr|C9JJT5|C9JJT5_HUMAN;tr|G3V325|G3V325_HUMAN;tr|C9JU26|C9JU26_HUMAN;sp|P56134|ATPK_HUMAN;sp|P56134-2|ATPK_HUMAN;sp|P56134-3|ATPK_HUMAN;sp|P56134-4|ATPK_HUMAN	838107	779879	79335	604533	463665	631462	0.00237389	FALSE
+56.063AGVAPLQVK+56.063	tr|Q60FE5|Q60FE5_HUMAN;tr|A0A087WWY3|A0A087WWY3_HUMAN;sp|P21333|FLNA_HUMAN;sp|P21333-2|FLNA_HUMAN	16903036	5526253	3.0723e+06	21023658	6704617	13755818	0.00293083	FALSE
+56.063QQAAYYGQTPGPGGPQPPPTQQGQQQAQ	tr|M0R3J3|M0R3J3_HUMAN;sp|Q92945|FUBP2_HUMAN	15404690	7.73059e+06	1.2203e+06	7.31233e+06	1.17209e+06	3.08199e+06	0	FALSE
+56.063IDEM+15.995PEAAVK+56.063	sp|P51858|HDGF_HUMAN	3143885	1.21616e+06	1.08345e+06	1.41477e+06	1.12514e+06	622619	0.00237389	FALSE
+56.063VLVQNAAGSQEK+56.063	sp|Q9Y490|TLN1_HUMAN	3.84809e+06	1687728	189894	1.83058e+06	399069	1.10898e+06	0.00145402	FALSE
+56.063APVPGTPDSLSSGSSR	tr|A0A087WYB4|A0A087WYB4_HUMAN;sp|Q9UJZ1|STML2_HUMAN;sp|Q9UJZ1-2|STML2_HUMAN	5.05565e+06	1.23244e+06	350027	1.49423e+06	239751	1.09447e+06	0.00293083	FALSE
+56.063NFILDQTNVSAAAQR	tr|A0A1W2PQL0|A0A1W2PQL0_HUMAN;tr|A0A1W2PQD4|A0A1W2PQD4_HUMAN;tr|A0A1W2PP34|A0A1W2PP34_HUMAN;tr|Q5RI18|Q5RI18_HUMAN;tr|A0A1W2PQ74|A0A1W2PQ74_HUMAN;tr|A0A1W2PPH7|A0A1W2PPH7_HUMAN;tr|A0A1W2PP35|A0A1W2PP35_HUMAN;tr|A0A1W2PPL4|A0A1W2PPL4_HUMAN;tr|A0A1W2PPS1|A0A1W2PPS1_HUMAN;tr|A0A1X7SBS1|A0A1X7SBS1_HUMAN;tr|A0A1W2PRZ7|A0A1W2PRZ7_HUMAN;sp|Q00839|HNRPU_HUMAN;sp|Q00839-2|HNRPU_HUMAN	8586507	13556034	9425341	9141081	11288479	5.7919e+06	0	FALSE
+56.063ETVPTLAPK+56.063	sp|Q8WW12|PCNP_HUMAN;sp|Q8WW12-2|PCNP_HUMAN	16607168	7887240	631752	10406080	2289433	5162187	0	FALSE
+56.063IMATPEQVGK+56.063	tr|B1AHC9|B1AHC9_HUMAN;sp|P12956|XRCC6_HUMAN;sp|P12956-2|XRCC6_HUMAN	10347284	3.55151e+06	976441	3.13921e+06	848746	1.03812e+06	0.00145402	FALSE
+56.063GVPPPPTVR	sp|Q07666|KHDR1_HUMAN;sp|Q07666-2|KHDR1_HUMAN;sp|Q07666-3|KHDR1_HUMAN	7.41523e+06	3.64007e+06	239107	4.06003e+06	487902	2.02091e+06	0.00145402	FALSE
+56.063ADGGAEYATYQTK+56.063	tr|R4GN18|R4GN18_HUMAN;sp|P15529-2|MCP_HUMAN;sp|P15529-3|MCP_HUMAN;sp|P15529-4|MCP_HUMAN;sp|P15529-5|MCP_HUMAN;sp|P15529-6|MCP_HUMAN;sp|P15529-7|MCP_HUMAN;sp|P15529-16|MCP_HUMAN	2.28547e+06	381597	193427	207309	28527.3	303692	0.00145402	FALSE
+56.063AEDGATPSPSNETPK+56.063	sp|P29966|MARCS_HUMAN	560228	233850	29606.3	238932	401059	246856	0.00457928	FALSE
+56.063TSPTPPESATTVK+56.063	tr|J3KSG2|J3KSG2_HUMAN;sp|Q5M775|CYTSB_HUMAN;sp|Q5M775-4|CYTSB_HUMAN	7.74774e+06	3.7325e+06	503101	3.95416e+06	578221	1464992	0.00145402	FALSE
+56.063GLSGAQDPFPGPAPVPVEVVQK+56.063	tr|A0A140T9L0|A0A140T9L0_HUMAN;tr|A0A0G2JJL1|A0A0G2JJL1_HUMAN	1.22184e+06	0	0	1.09603e+06	0	0	0.00293083	FALSE
+56.063AADPPAENSSAPEAEQGGAE	tr|H0Y449|H0Y449_HUMAN;sp|P67809|YBOX1_HUMAN	120763864	65122732	7929038	60166660	13630384	16286979	0.00431282	FALSE
+56.063LTYTAEVSVPK+56.063	sp|P09960|LKHA4_HUMAN;sp|P09960-2|LKHA4_HUMAN;sp|P09960-3|LKHA4_HUMAN;sp|P09960-4|LKHA4_HUMAN	4.95733e+06	2.9873e+06	2.67083e+06	3.49836e+06	3004618	2.30431e+06	0.00293083	FALSE
+56.063TVSLGAGAK+56.063DELHIVEAEAM+15.995NYEGSPIK+56.063VTLATLK+56.063	sp|P06748|NPM_HUMAN;sp|P06748-2|NPM_HUMAN;sp|P06748-3|NPM_HUMAN	893591	626308	731755	292880	429731	578933	0	FALSE
+56.063DETNYGIPQR	tr|E9PD14|E9PD14_HUMAN;tr|D6RHH4|D6RHH4_HUMAN;tr|D6RAU2|D6RAU2_HUMAN;tr|D6RAC2|D6RAC2_HUMAN;tr|D6RFZ9|D6RFZ9_HUMAN;tr|D6RFX4|D6RFX4_HUMAN;tr|D6R9L0|D6R9L0_HUMAN;tr|D6R909|D6R909_HUMAN;tr|D6RGK8|D6RGK8_HUMAN;tr|D6REE5|D6REE5_HUMAN;tr|D6R9Z1|D6R9Z1_HUMAN;tr|D6RBD0|D6RBD0_HUMAN;sp|P63244|RACK1_HUMAN	5.2519e+06	3.09997e+06	1.61521e+06	3839862	1.8369e+06	1.25562e+06	0	FALSE
+56.063VTQQVNPIFSEAC+57.021	tr|H0YNJ6|H0YNJ6_HUMAN;tr|H0YN22|H0YN22_HUMAN;tr|H0YMB3|H0YMB3_HUMAN;tr|H0YLV5|H0YLV5_HUMAN;tr|H0YK13|H0YK13_HUMAN;tr|F8WAN9|F8WAN9_HUMAN;tr|A0A087WWM4|A0A087WWM4_HUMAN;sp|Q9P2T1|GMPR2_HUMAN;sp|Q9P2T1-2|GMPR2_HUMAN;sp|Q9P2T1-3|GMPR2_HUMAN	37775396	18281796	1.63541e+06	18945614	2.33809e+06	8580170	0.00293083	FALSE
+56.063LC+57.021YYIGATDDAATK+56.063	tr|A8K878|A8K878_HUMAN;sp|P55145|MANF_HUMAN	3.48931e+06	5.40775e+06	1.50874e+06	2.81665e+06	2.16037e+06	405934	0.00293083	FALSE
+56.063VPADTEVVC+57.021APPTAYIDFAR	sp|P60174|TPIS_HUMAN;sp|P60174-1|TPIS_HUMAN	15270017	8757337	709218	8091555	1.35868e+06	4.93474e+06	0.00237389	FALSE
+56.063DLYANTVLSGGTTM+15.995YPGIADR	tr|A0A2R8Y793|A0A2R8Y793_HUMAN;sp|P63261|ACTG_HUMAN;sp|P60709|ACTB_HUMAN	4.05389e+06	917862	2033763	3.68728e+06	3.2744e+06	0	0.00293083	FALSE
+56.063FSNSIPQSQTGNSETATPTNVDLPQVIPK+56.063	sp|P46087|NOP2_HUMAN;sp|P46087-2|NOP2_HUMAN;sp|P46087-4|NOP2_HUMAN	7.69934e+06	4.10753e+06	3.1264e+06	4.35435e+06	1.52158e+06	3.29082e+06	0.00145402	FALSE
+56.063ATGPPVSELITK+56.063	sp|P16401|H15_HUMAN	10937662	3.04353e+06	564547	2234437	675628	865562	0	FALSE
+56.063VTTGTSNTTAIK+56.063	sp|Q15291|RBBP5_HUMAN;sp|Q15291-2|RBBP5_HUMAN	1.27692e+06	447260	0	650678	0	366580	0.00293083	FALSE
+56.063SADTLWDIQK+56.063DLK+56.063DL	sp|P07195|LDHB_HUMAN	837932	939383	0	625624	0	2.0731	0.00431282	FALSE
+56.063LAPDYDALDVANK+56.063	tr|H7BY10|H7BY10_HUMAN;tr|K7ERT8|K7ERT8_HUMAN;tr|K7EJV9|K7EJV9_HUMAN;tr|A8MUS3|A8MUS3_HUMAN;tr|K7EMA7|K7EMA7_HUMAN;sp|P62750|RL23A_HUMAN	3.81789e+06	1.92403e+06	426485	1.66213e+06	542266	1.09133e+06	0.00293083	FALSE
+56.063VGLQVVAVK+56.063	sp|P10809|CH60_HUMAN	2.84725e+06	1.63101e+06	0	1.84913e+06	0	508452	0.00293083	FALSE
+56.063VLQALGSEPIQYAVPVVK+56.063	tr|F5H6E2|F5H6E2_HUMAN;sp|O00159|MYO1C_HUMAN;sp|O00159-2|MYO1C_HUMAN;sp|O00159-3|MYO1C_HUMAN	370635	174679	154364	0	0	200687	0.00293083	FALSE
+56.063NMGGPYGGGNYGPGGSGGSGGYGGR	sp|P22626|ROA2_HUMAN;sp|P22626-2|ROA2_HUMAN	5.93951e+06	1386222	1.2695e+06	1302283	5627730	469200	0.00237389	FALSE
+56.063IIDEVVNK+56.063FLDDLGNAK+56.063	sp|O95816|BAG2_HUMAN;sp|O95816-2|BAG2_HUMAN	272583	214473	263212	199604	0	0	0.00293083	FALSE
+56.063EVDEQM+15.995LNVQNK+56.063	tr|Q5ST81|Q5ST81_HUMAN;tr|Q5JP53|Q5JP53_HUMAN;sp|P07437|TBB5_HUMAN;sp|Q13885|TBB2A_HUMAN;sp|P68371|TBB4B_HUMAN;sp|Q9BVA1|TBB2B_HUMAN	2.74931e+06	997369	220801	612100	212566	369684	0.00431282	FALSE
+56.063QSLPPGLAVK+56.063	sp|P63173|RL38_HUMAN	41296340	20238100	2.51557e+06	0	0	23813684	0.00145402	FALSE
+56.063MLGPEGGEGFVVK+56.063	tr|A0A1B0GW42|A0A1B0GW42_HUMAN;sp|P52597|HNRPF_HUMAN	34683460	16816166	4.25303e+06	5140212	665502	3.81851e+06	0.00457928	FALSE
+56.063MDVLVSEC+57.021SAR	tr|E5RH09|E5RH09_HUMAN;tr|E5RJM9|E5RJM9_HUMAN;tr|E5RI24|E5RI24_HUMAN;sp|P54136|SYRC_HUMAN	22467806	0	210948	2.73567e+06	7.7688e+06	0	0.00293083	FALSE
+56.063TQPM+15.995TAQAASYR	sp|Q96PK6|RBM14_HUMAN	621384	286894	209892	400692	62185.1	332057	0.00293083	FALSE
+56.063SIFSAVLDELK+56.063	sp|P31327|CPSM_HUMAN;sp|P31327-2|CPSM_HUMAN;sp|P31327-3|CPSM_HUMAN	180840	37429.4	106162	154318	108245	76608.1	0.00457928	FALSE
+56.063LTSFIGAIAIGDLVK+56.063	tr|F5GWF6|F5GWF6_HUMAN;tr|F8VQ14|F8VQ14_HUMAN;sp|P78371|TCPB_HUMAN	355316	279187	0	241289	0	0	0.00431282	FALSE
+56.063LQVVDQPLPVR	tr|A0A0U1RQF0|A0A0U1RQF0_HUMAN;sp|P49327|FAS_HUMAN	2.34763e+06	798866	914478	914549	953100	259266	0.00145402	FALSE
+56.063AAEC+57.021NIVVTQPR	sp|Q08211|DHX9_HUMAN	13834218	5.96226e+06	598374	7.70011e+06	1.18004e+06	2.15594e+06	0.00145402	FALSE
+56.063GDLGIEIPAEK+56.063	tr|B4DNK4|B4DNK4_HUMAN;tr|H3BR70|H3BR70_HUMAN;tr|H3BTN5|H3BTN5_HUMAN;sp|P14618|KPYM_HUMAN;sp|P14618-2|KPYM_HUMAN;sp|P14618-3|KPYM_HUMAN;sp|P30613|KPYR_HUMAN;sp|P30613-2|KPYR_HUMAN	20210924	8881360	778669	10819496	1.2416e+06	5.04701e+06	0	FALSE
+56.063IQSTVTQPGGK+56.063	tr|A0A0G2JN29|A0A0G2JN29_HUMAN;tr|A0A087X117|A0A087X117_HUMAN;tr|J3KN36|J3KN36_HUMAN;sp|P69849|NOMO3_HUMAN;sp|Q5JPE7|NOMO2_HUMAN;sp|Q5JPE7-2|NOMO2_HUMAN;sp|Q15155|NOMO1_HUMAN	1.85123e+06	1.01189e+06	2165.23	905049	290020	551694	0.00237389	FALSE
+56.063AVTPPM+15.995PLLTPATPGGLPPAAAVAAAAATAK+56.063	tr|A0A0J9YXJ8|A0A0J9YXJ8_HUMAN;tr|E9PQ56|E9PQ56_HUMAN;tr|A0A0J9YWM1|A0A0J9YWM1_HUMAN;tr|H0YEM1|H0YEM1_HUMAN;tr|A0A0J9YVR6|A0A0J9YVR6_HUMAN;tr|A0A0J9YXX5|A0A0J9YXX5_HUMAN;tr|A0A0J9YYL3|A0A0J9YYL3_HUMAN;tr|A0A0J9YVP6|A0A0J9YVP6_HUMAN;tr|H0YCP8|H0YCP8_HUMAN;sp|Q9UHX1|PUF60_HUMAN;sp|Q9UHX1-2|PUF60_HUMAN;sp|Q9UHX1-3|PUF60_HUMAN;sp|Q9UHX1-4|PUF60_HUMAN;sp|Q9UHX1-5|PUF60_HUMAN;sp|Q9UHX1-6|PUF60_HUMAN	1.82082e+06	1.546e+06	408.884	465949	0	1.44841e+06	0.00431282	FALSE
+56.063IAIYELLFK+56.063	tr|A0A1W2PQS6|A0A1W2PQS6_HUMAN;tr|A0A2R8Y6L3|A0A2R8Y6L3_HUMAN;tr|A0A2R8Y7H1|A0A2R8Y7H1_HUMAN;tr|A0A2R8YFH6|A0A2R8YFH6_HUMAN;tr|F6U211|F6U211_HUMAN;sp|P46783|RS10_HUMAN	1.26191e+06	2.19899e+06	0	2.4745e+06	1.31569e+06	0	0.00482955	FALSE
+56.063ATISNDGATILK+56.063	tr|F8WAM2|F8WAM2_HUMAN;sp|Q99832|TCPH_HUMAN;sp|Q99832-3|TCPH_HUMAN	5001568	4.93251e+06	3.20169e+06	4.17641e+06	0	2.62397e+06	0.00482955	FALSE
+56.063ADGGAEYATYQTK+56.063	tr|R4GN18|R4GN18_HUMAN;sp|P15529-2|MCP_HUMAN;sp|P15529-3|MCP_HUMAN;sp|P15529-4|MCP_HUMAN;sp|P15529-5|MCP_HUMAN;sp|P15529-6|MCP_HUMAN;sp|P15529-7|MCP_HUMAN;sp|P15529-16|MCP_HUMAN	2994189	651719	642229	804604	741739	811049	0.000399521	FALSE
+56.063AGDTVIPLYIPQC+57.021GEC+57.021K+56.063	tr|D6RFE4|D6RFE4_HUMAN;sp|P11766|ADHX_HUMAN	3498370	1.59911e+06	1.08544e+06	2.55813e+06	1.82176e+06	1.78803e+06	0.00145402	FALSE
+56.063NAAPPPSNTEAPPGETR	tr|G3V529|G3V529_HUMAN;tr|A0A1W2PRR2|A0A1W2PRR2_HUMAN;tr|F5GYL3|F5GYL3_HUMAN;sp|Q9GZR7|DDX24_HUMAN;sp|Q9GZR7-2|DDX24_HUMAN	4891896	2.97433e+06	494296	2639548	692685	1.33222e+06	0.000399521	FALSE
+56.063GVVQELQQAISK+56.063LEAR	tr|E9PL12|E9PL12_HUMAN;tr|E9PK01|E9PK01_HUMAN;tr|E9PRY8|E9PRY8_HUMAN;tr|E9PIZ1|E9PIZ1_HUMAN;tr|E9PN91|E9PN91_HUMAN;tr|H0YCK7|H0YCK7_HUMAN;tr|E9PMW7|E9PMW7_HUMAN;tr|E9PPR1|E9PPR1_HUMAN;tr|A0A087X1X7|A0A087X1X7_HUMAN;tr|E9PL71|E9PL71_HUMAN;tr|E9PQ49|E9PQ49_HUMAN;tr|E9PI39|E9PI39_HUMAN;sp|P29692|EF1D_HUMAN;sp|P29692-2|EF1D_HUMAN;sp|P29692-3|EF1D_HUMAN	904812	504020	147519	373066	288981	145268	0.000399521	FALSE
+56.063FSNSIPQSQTGNSETATPTNVDLPQVIPK+56.063	sp|P46087|NOP2_HUMAN;sp|P46087-2|NOP2_HUMAN;sp|P46087-4|NOP2_HUMAN	9477697	4.22127e+06	3.15798e+06	4.24259e+06	1.08441e+06	3.24649e+06	0.00237389	FALSE
+56.063NLPLPPPPPPR	tr|Q5T6W2|Q5T6W2_HUMAN;sp|P61978|HNRPK_HUMAN;sp|P61978-2|HNRPK_HUMAN;sp|P61978-3|HNRPK_HUMAN	138262064	69219296	5606943	68316400	9705347	33540982	0	FALSE
+56.063GGEIQPVSVK+56.063	tr|B8ZZL8|B8ZZL8_HUMAN;tr|B8ZZ54|B8ZZ54_HUMAN;sp|P61604|CH10_HUMAN	2.04395e+06	1.81459e+06	1.59746e+06	0	717156	810877	0.00237389	FALSE
+58.075NC+57.021TIVSPDAGGAK+58.075	tr|A0A2R8Y7H4|A0A2R8Y7H4_HUMAN;tr|B1ALA9|B1ALA9_HUMAN;sp|P60891|PRPS1_HUMAN;sp|P60891-2|PRPS1_HUMAN	7647356	2.91797e+06	1.11365e+06	2857295	1.21552e+06	1.61569e+06	0	FALSE
+62.100IISNASC+57.021TTNC+57.021LAPLAK+62.100	tr|E7EUT5|E7EUT5_HUMAN;sp|P04406|G3P_HUMAN;sp|P04406-2|G3P_HUMAN	14955222	31606354	22192362	26461742	4.03857e+06	8795599	0	FALSE
+56.063VTGAALIPPPGGTSLTSLGQAAQ	sp|Q9BU61|NDUF3_HUMAN;sp|Q9BU61-2|NDUF3_HUMAN	15800826	8.30492e+06	626704	7.83182e+06	934507	5.02815e+06	0.00322203	FALSE
+56.063TVSLGAGAK+56.063DELHIVEAEAM+15.995NYEGSPIK+56.063VTLATLK+56.063	sp|P06748|NPM_HUMAN;sp|P06748-2|NPM_HUMAN;sp|P06748-3|NPM_HUMAN	1.5781e+06	1.08162e+06	1.39467e+06	821205	865131	940097	0.00237389	FALSE
+66.125VQPNEAVYTK+66.125	sp|P11413|G6PD_HUMAN;sp|P11413-2|G6PD_HUMAN;sp|P11413-3|G6PD_HUMAN	27767178	13350454	948778	14490028	2.18917e+06	6549180	0	FALSE
+56.063VC+57.021EEIAIIPSK+56.063	tr|A0A075B716|A0A075B716_HUMAN;tr|H3BNC9|H3BNC9_HUMAN;tr|H0YN88|H0YN88_HUMAN;tr|H0YN73|H0YN73_HUMAN;sp|P08708|RS17_HUMAN	3.71476e+06	1.90162e+06	370890	3.51376e+06	2.00131e+06	986270	0.00237389	FALSE
+56.063IQEAGTEVVK+56.063	tr|G3XAL0|G3XAL0_HUMAN;sp|P40926|MDHM_HUMAN;sp|P40926-2|MDHM_HUMAN	42533608	37904648	8372676	42236244	9401695	23894596	0	FALSE
+56.063EGQNYQQNC+57.021IK+56.063	tr|H3BPJ9|H3BPJ9_HUMAN;tr|H3BV16|H3BV16_HUMAN;sp|O96000|NDUBA_HUMAN;sp|O96000-2|NDUBA_HUMAN	434955	422049	205555	558979	495106	739931	0.00145402	FALSE
+58.075VM+15.995QQQQQTTQQQLPQK+58.075	sp|Q15459|SF3A1_HUMAN	13552077	7043775	646347	6629571	1313649	3.78302e+06	0	FALSE
+56.063SAAAAAANRK+56.063R	tr|A0A0J9YYD2|A0A0J9YYD2_HUMAN;tr|K7ERE0|K7ERE0_HUMAN;tr|K7EPH4|K7EPH4_HUMAN;tr|K7EJG1|K7EJG1_HUMAN;tr|B4DJ94|B4DJ94_HUMAN;tr|A0A0G2JNU9|A0A0G2JNU9_HUMAN;sp|O43861|ATP9B_HUMAN;sp|O43861-2|ATP9B_HUMAN	3.90724e+06	1.44184e+06	1.0674e+06	2.13301e+06	1.73604e+06	1643561	0.00145402	FALSE
+62.100DVNAAIATIK+62.100	tr|F5H5D3|F5H5D3_HUMAN;tr|A0A1W2PQM2|A0A1W2PQM2_HUMAN;sp|P68363|TBA1B_HUMAN;sp|P68363-2|TBA1B_HUMAN;sp|P0DPH7|TBA3C_HUMAN;sp|P0DPH7-2|TBA3C_HUMAN;sp|P0DPH8|TBA3D_HUMAN;sp|Q6PEY2|TBA3E_HUMAN;sp|Q71U36|TBA1A_HUMAN;sp|Q71U36-2|TBA1A_HUMAN;sp|Q9BQE3|TBA1C_HUMAN	6031059	2740006	93200.3	4.76725e+06	1.02164e+06	1.9764e+06	0	FALSE
+56.063VSADAAPDC+57.021PETSNQTPPGPGAAAGPGID	sp|Q9NXH9|TRM1_HUMAN;sp|Q9NXH9-2|TRM1_HUMAN	43990988	22982090	6052535	21334336	5151292	8672856	0	FALSE
+56.063DETNYGIPQR	tr|E9PD14|E9PD14_HUMAN;tr|D6RHH4|D6RHH4_HUMAN;tr|D6RAU2|D6RAU2_HUMAN;tr|D6RAC2|D6RAC2_HUMAN;tr|D6RFZ9|D6RFZ9_HUMAN;tr|D6RFX4|D6RFX4_HUMAN;tr|D6R9L0|D6R9L0_HUMAN;tr|D6R909|D6R909_HUMAN;tr|D6RGK8|D6RGK8_HUMAN;tr|D6REE5|D6REE5_HUMAN;tr|D6R9Z1|D6R9Z1_HUMAN;tr|D6RBD0|D6RBD0_HUMAN;sp|P63244|RACK1_HUMAN	2.04243e+06	1.34866e+06	991094	990613	894449	550547	0.00145402	FALSE
+62.100GTQGATAGASSELDASK+62.100	sp|O76094|SRP72_HUMAN;sp|O76094-2|SRP72_HUMAN	835641	382886	108368	326720	82346.4	104446	0	FALSE
+56.063AADPPAENSSAPEAEQGGAE	tr|H0Y449|H0Y449_HUMAN;sp|P67809|YBOX1_HUMAN	22283724	96879664	5503564	62740816	15215984	17874340	0.00378017	FALSE
+56.063VC+57.021NPIITK+56.063	tr|A8K7Q2|A8K7Q2_HUMAN;tr|E9PKE3|E9PKE3_HUMAN;tr|E9PNE6|E9PNE6_HUMAN;tr|E9PS65|E9PS65_HUMAN;sp|P11142|HSP7C_HUMAN	23622966	13180157	1.656e+06	16727708	2822206	8488403	0.00145402	FALSE
+56.063EIQTAVR	tr|U3KQK0|U3KQK0_HUMAN;sp|Q99877|H2B1N_HUMAN;sp|P23527|H2B1O_HUMAN;sp|P57053|H2BFS_HUMAN;sp|P62807|H2B1C_HUMAN;sp|P58876|H2B1D_HUMAN;sp|Q5QNW6|H2B2F_HUMAN;sp|Q5QNW6-2|H2B2F_HUMAN;sp|P06899|H2B1J_HUMAN;sp|O60814|H2B1K_HUMAN;sp|Q96A08|H2B1A_HUMAN;sp|Q16778|H2B2E_HUMAN;sp|Q93079|H2B1H_HUMAN;sp|P33778|H2B1B_HUMAN;sp|Q99880|H2B1L_HUMAN;sp|Q99879|H2B1M_HUMAN	4268793	1.72308e+06	173885	2.21743e+06	698370	1.0359e+06	0.00406622	FALSE
+58.075AQGPAASAEEPK+58.075PVEAPAANSDQTVTVK+58.075E	sp|P80723|BASP1_HUMAN;sp|P80723-2|BASP1_HUMAN	6805080	5.86443e+06	0	7.25003e+06	0	3.51414e+06	0	FALSE
+62.100TPC+57.021NAGTFSQPEK+62.100	tr|J3QSX4|J3QSX4_HUMAN;tr|J3QT28|J3QT28_HUMAN;sp|O43684|BUB3_HUMAN;sp|O43684-2|BUB3_HUMAN	5.30191e+06	1.73428e+06	153669	3.15857e+06	904914	1.61742e+06	0	FALSE
+56.063QQLDSC+57.021VTK+56.063	tr|E7EQY1|E7EQY1_HUMAN;sp|Q96C01|F136A_HUMAN	2.40418e+06	926666	328115	1.50043e+06	588838	941419	0.00145402	FALSE
+62.100GPLPAAPPVAPER	tr|F8W914|F8W914_HUMAN;sp|Q9NQC3|RTN4_HUMAN;sp|Q9NQC3-2|RTN4_HUMAN;sp|Q9NQC3-5|RTN4_HUMAN	17058042	5.55347e+06	0	7.17355e+06	759942	4.71196e+06	0	FALSE
+56.063VALVYGQMNEPPGAR	tr|F8W0P7|F8W0P7_HUMAN;tr|H0YH81|H0YH81_HUMAN;sp|P06576|ATPB_HUMAN	8615452	6593444	8.31373e+06	13137410	10636200	6.39696e+06	0.00237389	FALSE
+62.100TTTLSGTAPAAGVVPSR	tr|E7EVA0|E7EVA0_HUMAN;tr|F8W9U4|F8W9U4_HUMAN;tr|H7C4C5|H7C4C5_HUMAN;tr|B5MEG9|B5MEG9_HUMAN;tr|H0Y2V1|H0Y2V1_HUMAN;sp|P27816|MAP4_HUMAN;sp|P27816-2|MAP4_HUMAN;sp|P27816-4|MAP4_HUMAN;sp|P27816-5|MAP4_HUMAN;sp|P27816-6|MAP4_HUMAN	23921778	15339914	15702444	13458917	11324618	13163207	0	FALSE
+58.075ADHQPLTEASYVNLPTIALC+57.021NTDSPLR	tr|A0A0C4DG17|A0A0C4DG17_HUMAN;tr|C9J9K3|C9J9K3_HUMAN;sp|P08865|RSSA_HUMAN	1.44196e+06	304890	1.06299e+06	608336	0	0	0.000399521	FALSE
+58.075MELQPPEASIAVVSIPR	tr|J3KPF3|J3KPF3_HUMAN;tr|F5GZS6|F5GZS6_HUMAN;sp|P08195|4F2_HUMAN;sp|P08195-3|4F2_HUMAN;sp|P08195-4|4F2_HUMAN	0	898010	61208.7	366886	0	0	0.00237389	FALSE
+58.075C+57.021TGGEVGATSALAPK+58.075	sp|P30050|RL12_HUMAN;sp|P30050-2|RL12_HUMAN	86587520	44619464	3.28085e+06	46015064	7.86905e+06	20380362	0	FALSE
+58.075AASADSTTEGTPADGFTVLSTK+58.075	sp|O75367|H2AY_HUMAN;sp|O75367-2|H2AY_HUMAN;sp|O75367-3|H2AY_HUMAN	29300118	15316964	1.38263e+06	14518517	1702639	8621363	0	FALSE
+58.075AGVNTVTTLVENK+58.075	tr|Q5T8U2|Q5T8U2_HUMAN;tr|Q5T8U3|Q5T8U3_HUMAN;sp|P62424|RL7A_HUMAN	5.29889e+06	2453222	490860	3145135	483531	1.15585e+06	0	FALSE
+58.075NQVAM+15.995NPTNTVFDAK+58.075	tr|E9PN25|E9PN25_HUMAN;tr|E9PKE3|E9PKE3_HUMAN;tr|E9PNE6|E9PNE6_HUMAN;tr|E9PQQ4|E9PQQ4_HUMAN;tr|E9PLF4|E9PLF4_HUMAN;tr|E9PPY6|E9PPY6_HUMAN;tr|E9PK54|E9PK54_HUMAN;tr|E9PQK7|E9PQK7_HUMAN;sp|P11142|HSP7C_HUMAN;sp|P11142-2|HSP7C_HUMAN	12773214	12496100	981251	11146916	2128457	7.06701e+06	0	FALSE
+58.075GC+57.021DVVVIPAGVPR	sp|P40926|MDHM_HUMAN;sp|P40926-2|MDHM_HUMAN	19697924	11702477	928527	7.91952e+06	2.87657e+06	5545624	0	FALSE
+58.075QYEQQTYQVIPEVIK+58.075	tr|H7C3A0|H7C3A0_HUMAN;tr|B0QY89|B0QY89_HUMAN;tr|C9JHP4|C9JHP4_HUMAN;tr|C9K0Q7|C9K0Q7_HUMAN;sp|Q9Y262|EIF3L_HUMAN;sp|Q9Y262-2|EIF3L_HUMAN	4614158	1.03533e+06	724942	646506	0	425436	0	FALSE
+58.075VSSSYPVEPK+58.075	sp|Q9BTX1|NDC1_HUMAN;sp|Q9BTX1-2|NDC1_HUMAN;sp|Q9BTX1-4|NDC1_HUMAN;sp|Q9BTX1-5|NDC1_HUMAN;sp|Q9BTX1-6|NDC1_HUMAN	10785790	4757528	601418	4962979	727612	2692058	0	FALSE
+58.075DVNAAIATIK+58.075	tr|F5H5D3|F5H5D3_HUMAN;tr|A0A1W2PQM2|A0A1W2PQM2_HUMAN;sp|P68363|TBA1B_HUMAN;sp|P68363-2|TBA1B_HUMAN;sp|P0DPH7|TBA3C_HUMAN;sp|P0DPH7-2|TBA3C_HUMAN;sp|P0DPH8|TBA3D_HUMAN;sp|Q6PEY2|TBA3E_HUMAN;sp|Q71U36|TBA1A_HUMAN;sp|Q71U36-2|TBA1A_HUMAN;sp|Q9BQE3|TBA1C_HUMAN	30620016	15963551	1.236e+06	18699204	3.0371e+06	8076145	0	FALSE
+58.075DVNAAIATIK+58.075	tr|F5H5D3|F5H5D3_HUMAN;tr|A0A1W2PQM2|A0A1W2PQM2_HUMAN;sp|P68363|TBA1B_HUMAN;sp|P68363-2|TBA1B_HUMAN;sp|P0DPH7|TBA3C_HUMAN;sp|P0DPH7-2|TBA3C_HUMAN;sp|P0DPH8|TBA3D_HUMAN;sp|Q6PEY2|TBA3E_HUMAN;sp|Q71U36|TBA1A_HUMAN;sp|Q71U36-2|TBA1A_HUMAN;sp|Q9BQE3|TBA1C_HUMAN	6.91047e+06	3.10055e+06	1443749	4.61508e+06	917998	1.28517e+06	0	FALSE
+58.075TK+58.075VHAELADVLTEAVVDSILAIK+58.075K+58.075	sp|P40227|TCPZ_HUMAN;sp|P40227-2|TCPZ_HUMAN	16429641	10749387	1.29578e+06	10041294	2932905	4.87997e+06	0	FALSE
+58.075DGDFENPVPYTGAVK+58.075	tr|F8VY02|F8VY02_HUMAN;sp|P30040|ERP29_HUMAN	23231158	11447437	1.1447e+06	10735015	1.17447e+06	6268293	0	FALSE
+58.075QLQAETEPIVK+58.075	tr|E5RIT4|E5RIT4_HUMAN;tr|H0YBR5|H0YBR5_HUMAN;sp|P60228|EIF3E_HUMAN	18222006	7761255	1.05142e+06	9505027	1.38246e+06	5.71904e+06	0	FALSE
+58.075YALQM+15.995EQLNGILLHLESELAQTR	tr|F8VZY9|F8VZY9_HUMAN;sp|P05783|K1C18_HUMAN	812188	959671	628028	1.2946e+06	0	795502	0.000399521	FALSE
+58.075AMGIMNSFVNDIFER	tr|U3KQK0|U3KQK0_HUMAN;sp|Q99877|H2B1N_HUMAN;sp|P23527|H2B1O_HUMAN;sp|P57053|H2BFS_HUMAN;sp|P62807|H2B1C_HUMAN;sp|P58876|H2B1D_HUMAN;sp|Q5QNW6|H2B2F_HUMAN;sp|Q5QNW6-2|H2B2F_HUMAN;sp|P06899|H2B1J_HUMAN;sp|O60814|H2B1K_HUMAN;sp|Q16778|H2B2E_HUMAN;sp|Q93079|H2B1H_HUMAN;sp|Q8N257|H2B3B_HUMAN;sp|P33778|H2B1B_HUMAN;sp|Q99880|H2B1L_HUMAN;sp|Q99879|H2B1M_HUMAN	938977	473532	2478.72	376565	54005.4	130117	0	FALSE
+58.075TQTPPLGQTPQLGLK+58.075	tr|E9PKF8|E9PKF8_HUMAN;tr|H0Y3P2|H0Y3P2_HUMAN;tr|D3DQV9|D3DQV9_HUMAN;sp|P78344|IF4G2_HUMAN;sp|P78344-2|IF4G2_HUMAN	6013910	3.79922e+06	568157	4680258	975096	2775546	0	FALSE
+58.075VQPNEAVYTK+58.075	sp|P11413|G6PD_HUMAN;sp|P11413-2|G6PD_HUMAN;sp|P11413-3|G6PD_HUMAN	27401378	12864730	922574	14197858	2.21015e+06	6.76255e+06	0	FALSE
+58.075VTIAQGGVLPNIQAVLLPK+58.075	tr|H0YFX9|H0YFX9_HUMAN;tr|A0A0U1RRH7|A0A0U1RRH7_HUMAN;tr|A0A0U1RR32|A0A0U1RR32_HUMAN;sp|Q9BTM1|H2AJ_HUMAN;sp|P04908|H2A1B_HUMAN;sp|P20671|H2A1D_HUMAN;sp|P0C0S8|H2A1_HUMAN;sp|Q96KK5|H2A1H_HUMAN;sp|Q93077|H2A1C_HUMAN;sp|Q16777|H2A2C_HUMAN;sp|Q99878|H2A1J_HUMAN;sp|Q6FI13|H2A2A_HUMAN;sp|Q7L7L0|H2A3_HUMAN	14814899	8056416	1.25565e+06	7.80716e+06	2.82055e+06	4622999	0	FALSE
+58.075VM+15.995TIPYQPMPASSPVIC+57.021AGGQDR	sp|Q15365|PCBP1_HUMAN	8683022	4449886	1.46715e+06	7511977	679401	4689433	0	FALSE
+58.075IEDLSQQAQLAAAEK+58.075	tr|F8VNW4|F8VNW4_HUMAN;tr|F8W1N5|F8W1N5_HUMAN;tr|F8W0W4|F8W0W4_HUMAN;tr|H0YHX9|H0YHX9_HUMAN;tr|F8VZJ2|F8VZJ2_HUMAN;sp|E9PAV3|NACAM_HUMAN;sp|E9PAV3-2|NACAM_HUMAN;sp|Q13765|NACA_HUMAN	42827828	20673624	543554	22004106	3.52669e+06	11299398	0	FALSE
+58.075QVMVVPVGPTC+57.021DEYAQK+58.075	sp|P26639|SYTC_HUMAN;sp|P26639-2|SYTC_HUMAN	19398908	9434779	2.76998e+06	11048882	1.57689e+06	3.48447e+06	0	FALSE
+58.075EITALAPSTMK+58.075	tr|A0A2R8YFE2|A0A2R8YFE2_HUMAN;tr|A6NL76|A6NL76_HUMAN;sp|P63261|ACTG_HUMAN;sp|P68133|ACTS_HUMAN;sp|P60709|ACTB_HUMAN;sp|P68032|ACTC_HUMAN;sp|P63267|ACTH_HUMAN;sp|P63267-2|ACTH_HUMAN;sp|P62736|ACTA_HUMAN	30398194	15323448	2119796	17889042	2360406	9406746	0	FALSE
+58.075AGAIAPC+57.021EVTVPAQNTGLGPEK+58.075	tr|G3V210|G3V210_HUMAN;tr|F8VRK7|F8VRK7_HUMAN;tr|F8VPE8|F8VPE8_HUMAN;tr|F8VWS0|F8VWS0_HUMAN;tr|F8VU65|F8VU65_HUMAN;tr|F8VQY6|F8VQY6_HUMAN;tr|F8VW21|F8VW21_HUMAN;sp|P05388|RLA0_HUMAN;sp|P05388-2|RLA0_HUMAN;sp|Q8NHW5|RLA0L_HUMAN	56129000	32504926	1.89064e+06	29976338	5.94427e+06	15935383	0	FALSE
+58.075STC+57.021IYGGAPK+58.075	tr|A0A1X7SBZ2|A0A1X7SBZ2_HUMAN;tr|J3KTA4|J3KTA4_HUMAN;tr|J3KRZ1|J3KRZ1_HUMAN;tr|J3QRQ7|J3QRQ7_HUMAN;tr|A0A1W2PQ51|A0A1W2PQ51_HUMAN;sp|P17844|DDX5_HUMAN;sp|P17844-2|DDX5_HUMAN;sp|Q92841|DDX17_HUMAN;sp|Q92841-1|DDX17_HUMAN;sp|Q92841-2|DDX17_HUMAN;sp|Q92841-3|DDX17_HUMAN	8.18201e+06	3.64086e+06	155864	4.32796e+06	0	1.73879e+06	0	FALSE
+58.075VLDNYLTSPLPEEVDETSAEDEGVSQR	sp|O00299|CLIC1_HUMAN	841817	762637	41607.1	902639	0	747470	0	FALSE
+58.075VAQGVSGAVQDK+58.075	tr|H0Y4R1|H0Y4R1_HUMAN;sp|P12268|IMDH2_HUMAN	1.78128e+06	751638	206130	880126	207090	459554	0.00237389	FALSE
+58.075QADVNLVNAK+58.075	tr|A0A2C9F2M7|A0A2C9F2M7_HUMAN;tr|A0A286YF22|A0A286YF22_HUMAN;sp|O43175|SERA_HUMAN	9970465	7319365	529632	4865784	499585	882678	0.000399521	FALSE
+58.075DATNVGDEGGFAPNILENK+58.075EGLELLK+58.075	tr|A0A2R8Y6G6|A0A2R8Y6G6_HUMAN;sp|P06733|ENOA_HUMAN;sp|P06733-2|ENOA_HUMAN	209075	227713	0.436756	237006	0	96993	0	FALSE
+58.075VAVEYLDPSPEVQK+58.075	tr|J3QT28|J3QT28_HUMAN;sp|O43684|BUB3_HUMAN;sp|O43684-2|BUB3_HUMAN	11291457	7.81935e+06	4.66966e+06	4865155	2.41465e+06	3.28758e+06	0	FALSE
+58.075M+15.995EDSASASLSSAAATGTSTSTPAAPTAR	tr|J3QSV6|J3QSV6_HUMAN;tr|I3L1Y4|I3L1Y4_HUMAN;tr|J3KPU7|J3KPU7_HUMAN;tr|I3L4T8|I3L4T8_HUMAN;tr|I3L2F2|I3L2F2_HUMAN;tr|I3L3U9|I3L3U9_HUMAN;sp|O76021|RL1D1_HUMAN	10510444	4.76054e+06	3.87704e+06	2.23645e+06	0	0	0.00237389	FALSE
+58.075IVLTNPVC+57.021TEVGEK+58.075	sp|Q2VIR3|IF2GL_HUMAN;sp|P41091|IF2G_HUMAN	13148754	5821510	1.11302e+06	5515154	1.22282e+06	3.2531e+06	0	FALSE
+58.075LASPSGSTSSGLEVVAPEGTSAPGGGPGTLDDSATIC+57.021R	tr|M0R0K9|M0R0K9_HUMAN;sp|Q13263|TIF1B_HUMAN;sp|Q13263-2|TIF1B_HUMAN	1.90061e+06	9142495	0	11623530	38725552	19363740	0	FALSE
+58.075QYEQQTYQVIPEVIK+58.075	tr|H7C3A0|H7C3A0_HUMAN;tr|B0QY89|B0QY89_HUMAN;tr|C9JHP4|C9JHP4_HUMAN;tr|C9K0Q7|C9K0Q7_HUMAN;sp|Q9Y262|EIF3L_HUMAN;sp|Q9Y262-2|EIF3L_HUMAN	6646820	4087087	3.77493e+06	3250055	2.60034e+06	2.31641e+06	0	FALSE
+58.075TK+58.075VHAELADVLTEAVVDSILAIK+58.075K+58.075	sp|P40227|TCPZ_HUMAN;sp|P40227-2|TCPZ_HUMAN	16782608	10277377	1.39722e+06	10183721	1.71631e+06	5318167	0	FALSE
+58.075TVTNAVVTVPAYFNDSQR	tr|E9PQQ4|E9PQQ4_HUMAN;tr|E9PI65|E9PI65_HUMAN;tr|E9PLF4|E9PLF4_HUMAN;tr|E9PN89|E9PN89_HUMAN;tr|E9PK54|E9PK54_HUMAN;tr|E9PQK7|E9PQK7_HUMAN;sp|P11142|HSP7C_HUMAN;sp|P11142-2|HSP7C_HUMAN	23735388	33912120	2.06739e+06	22946044	5237019	9884263	0	FALSE
+58.075VTIAQGGVLPNIQAVLLPK+58.075	tr|H0YFX9|H0YFX9_HUMAN;tr|A0A0U1RRH7|A0A0U1RRH7_HUMAN;tr|A0A0U1RR32|A0A0U1RR32_HUMAN;sp|Q9BTM1|H2AJ_HUMAN;sp|P04908|H2A1B_HUMAN;sp|P20671|H2A1D_HUMAN;sp|P0C0S8|H2A1_HUMAN;sp|Q96KK5|H2A1H_HUMAN;sp|Q93077|H2A1C_HUMAN;sp|Q16777|H2A2C_HUMAN;sp|Q99878|H2A1J_HUMAN;sp|Q6FI13|H2A2A_HUMAN;sp|Q7L7L0|H2A3_HUMAN	2.22985e+06	946298	803391	1.05273e+06	339388	698757	0	FALSE
+58.075AQGPAASAEEPK+58.075PVEAPAANSDQTVTVK+58.075E	sp|P80723|BASP1_HUMAN;sp|P80723-2|BASP1_HUMAN	7245869	5224855	0	7.60728e+06	0	3.65336e+06	0	FALSE
+58.075NQVAM+15.995NPTNTVFDAK+58.075	tr|E9PN25|E9PN25_HUMAN;tr|E9PKE3|E9PKE3_HUMAN;tr|E9PNE6|E9PNE6_HUMAN;tr|E9PQQ4|E9PQQ4_HUMAN;tr|E9PLF4|E9PLF4_HUMAN;tr|E9PPY6|E9PPY6_HUMAN;tr|E9PK54|E9PK54_HUMAN;tr|E9PQK7|E9PQK7_HUMAN;sp|P11142|HSP7C_HUMAN;sp|P11142-2|HSP7C_HUMAN	21580316	9931112	796907	10822816	2447405	6863215	0	FALSE
+58.075YVVVTGITPTPLGEGK+58.075	tr|F5H2F4|F5H2F4_HUMAN;sp|P11586|C1TC_HUMAN	1.70102e+06	1.5676e+06	0	2.66337e+06	0	1.93314e+06	0.00145402	FALSE
+58.075GYWAGLDASAQTTSHELTIPNDLIGC+57.021IIGR	tr|F8VZX2|F8VZX2_HUMAN;tr|F8VRH0|F8VRH0_HUMAN;sp|Q15366-2|PCBP2_HUMAN;sp|Q15366-3|PCBP2_HUMAN;sp|Q15366-4|PCBP2_HUMAN;sp|Q15366-5|PCBP2_HUMAN	28107.8	367642	114443	443999	0	641679	0.00145402	FALSE
+58.075NAAPPPSNTEAPPGETR	tr|G3V529|G3V529_HUMAN;tr|A0A1W2PRR2|A0A1W2PRR2_HUMAN;tr|F5GYL3|F5GYL3_HUMAN;sp|Q9GZR7|DDX24_HUMAN;sp|Q9GZR7-2|DDX24_HUMAN	1.45962e+06	1.01098e+06	157145	639275	225920	288546	0.00237389	FALSE
+58.075SLDLDGIIAEVK+58.075	tr|A0A1W2PRP1|A0A1W2PRP1_HUMAN;sp|P08729|K2C7_HUMAN	7.07745e+06	4354922	2.22527e+06	538783	0	633169	0.00237389	FALSE
+58.075VGINYQPPTVVPGGDLAK+58.075	tr|C9J2C0|C9J2C0_HUMAN;tr|F5H5D3|F5H5D3_HUMAN;tr|A0A1W2PQM2|A0A1W2PQM2_HUMAN;tr|V9GZ17|V9GZ17_HUMAN;sp|P68363|TBA1B_HUMAN;sp|P68363-2|TBA1B_HUMAN;sp|Q9NY65|TBA8_HUMAN;sp|Q9NY65-2|TBA8_HUMAN;sp|P68366|TBA4A_HUMAN;sp|P68366-2|TBA4A_HUMAN;sp|P0DPH7|TBA3C_HUMAN;sp|P0DPH7-2|TBA3C_HUMAN;sp|P0DPH8|TBA3D_HUMAN;sp|Q6PEY2|TBA3E_HUMAN;sp|Q71U36|TBA1A_HUMAN;sp|Q71U36-2|TBA1A_HUMAN;sp|Q9BQE3|TBA1C_HUMAN	0	10659380	3692323	6.76092e+06	8457987	7534866	0	FALSE
+62.100TQPTYPSVK+62.100	sp|O15226|NKRF_HUMAN;sp|O15226-2|NKRF_HUMAN	23209538	9634121	801565	11742495	1.49879e+06	6774117	0	FALSE
+58.075TTTAAAVASTGPSSR	tr|E7EVA0|E7EVA0_HUMAN;tr|F8W9U4|F8W9U4_HUMAN;tr|H7C4C5|H7C4C5_HUMAN;tr|B5MEG9|B5MEG9_HUMAN;tr|H0Y2V1|H0Y2V1_HUMAN;sp|P27816|MAP4_HUMAN;sp|P27816-2|MAP4_HUMAN;sp|P27816-4|MAP4_HUMAN;sp|P27816-5|MAP4_HUMAN;sp|P27816-6|MAP4_HUMAN	3.15936e+06	1.78731e+06	250999	1.92506e+06	341533	726541	0	FALSE
+58.075EALENANTNTEVLK+58.075	sp|Q9H444|CHM4B_HUMAN	5364167	2.2161e+06	132597	2.00019e+06	0	681762	0	FALSE
+58.075QQAAYYAQTSPQGMPQHPPAPQGQ	sp|Q96AE4|FUBP1_HUMAN	26289618	16366373	2.72211e+06	17613682	2.59756e+06	6.15805e+06	0	FALSE
+58.075GSAPPGPVPEGSIR	sp|P78417|GSTO1_HUMAN;sp|P78417-2|GSTO1_HUMAN	16793168	7078812	2738566	9397626	1.49851e+06	3681800	0	FALSE
+58.075GADSELSTVPSVTK+58.075	sp|P46087|NOP2_HUMAN;sp|P46087-2|NOP2_HUMAN;sp|P46087-4|NOP2_HUMAN	19039584	8250905	1282043	9399337	2.00738e+06	4.81333e+06	0	FALSE
+58.075TK+58.075VHAELADVLTEAVVDSILAIK+58.075K+58.075	sp|P40227|TCPZ_HUMAN;sp|P40227-2|TCPZ_HUMAN	6.91994e+06	4300262	989790	3.80283e+06	786254	2.65264e+06	0	FALSE
+58.075NC+57.021IVLIDSTPYR	tr|Q5JR95|Q5JR95_HUMAN;sp|P62241|RS8_HUMAN	2.97582e+06	4.35732e+06	561223	1.29367e+06	2.27366e+06	499810	0	FALSE
+58.075QQAAYYAQTSPQGM+15.995PQHPPAPQGQ	sp|Q96AE4|FUBP1_HUMAN	11720134	6.30606e+06	504184	8505425	1.02277e+06	3.45367e+06	0	FALSE
+58.075NSEPAGLETPEAK+58.075	tr|V9GYZ6|V9GYZ6_HUMAN;sp|P07814|SYEP_HUMAN	15199764	7453115	362210	7.68574e+06	1.25453e+06	3.05429e+06	0	FALSE
+58.075QGGGGGGGSVPGIER	tr|A0A087X0X3|A0A087X0X3_HUMAN;tr|M0R2T0|M0R2T0_HUMAN;tr|M0R019|M0R019_HUMAN;sp|P52272|HNRPM_HUMAN;sp|P52272-2|HNRPM_HUMAN	27527454	8934672	870690	1563829	464595	0	0	FALSE
+58.075GYWASLDASTQTTHELTIPNNLIGC+57.021IIGR	sp|Q15365|PCBP1_HUMAN	213789	155241	0	304187	0	502234	0.00237389	FALSE
+58.075AQQVSQGLDVLTAK+58.075	sp|P18206|VINC_HUMAN;sp|P18206-2|VINC_HUMAN	8.12112e+06	4389727	1.03007e+06	3580878	1.40363e+06	1.28923e+06	0	FALSE
+58.075IAVEPVNPSELPK+58.075	sp|Q15029|U5S1_HUMAN;sp|Q15029-2|U5S1_HUMAN;sp|Q15029-3|U5S1_HUMAN	76889568	35032148	3.88297e+06	40591460	7.02529e+06	20730726	0	FALSE
+58.075EAQQALGSAAADATEAK+58.075	sp|P11047|LAMC1_HUMAN	11195612	4.50392e+06	0	5771648	1.39925e+06	3.42586e+06	0	FALSE
+58.075ASGPPVSELITK+58.075	sp|P16403|H12_HUMAN;sp|P10412|H14_HUMAN;sp|P16402|H13_HUMAN	36963432	18651740	1.27362e+06	20593792	2.98803e+06	12602607	0	FALSE
+58.075YALQM+15.995EQLNGILLHLESELAQTR	tr|F8VZY9|F8VZY9_HUMAN;sp|P05783|K1C18_HUMAN	505879	625650	452681	782922	66714.4	325700	0	FALSE
+58.075LIAPVAEEEATVPNNK+58.075	tr|A0A3B3IS95|A0A3B3IS95_HUMAN;tr|A8MW50|A8MW50_HUMAN;tr|F5H793|F5H793_HUMAN;tr|C9J7H8|C9J7H8_HUMAN;sp|P07195|LDHB_HUMAN	55865824	27891078	1.34203e+06	30604520	5160092	16403630	0	FALSE
+58.075TGVVPQLVK+58.075	sp|P52292|IMA1_HUMAN	7950075	3.38974e+06	216241	2.764e+06	656425	1.33811e+06	0	FALSE
+58.075C+57.021LYASVLTAQPR	sp|P13639|EF2_HUMAN	847053	1.49712e+06	976577	1.11244e+06	441217	778066	0.000399521	FALSE
+58.075TYDPSGDSTLPTC+57.021SK+58.075	sp|Q9Y2X3|NOP58_HUMAN	9354306	6258872	731908	6.23139e+06	2.5693e+06	3.17543e+06	0	FALSE
+58.075NGSEADIDEGLYSR	tr|Q5JRS2|Q5JRS2_HUMAN;tr|Q5JRS3|Q5JRS3_HUMAN;tr|Q5JRS0|Q5JRS0_HUMAN;tr|Q5JRS1|Q5JRS1_HUMAN;tr|Q5JRR9|Q5JRR9_HUMAN;sp|P22314|UBA1_HUMAN;sp|P22314-2|UBA1_HUMAN	32505750	31532730	10969545	11443593	17567162	15443340	0	FALSE
+58.075SQDPTPPSAPQEATEGSK+58.075	sp|Q9UPN7|PP6R1_HUMAN	5638089	2.50925e+06	492444	2.59754e+06	1.27289e+06	1.28703e+06	0	FALSE
+58.075VNQIGSVTESLQAC+57.021K+58.075	tr|A0A2R8Y6G6|A0A2R8Y6G6_HUMAN;sp|P06733|ENOA_HUMAN;sp|P06733-2|ENOA_HUMAN	130517848	67882232	7.35251e+06	76108328	14553913	31165692	0	FALSE
+58.075VNQIGSVTESIQAC+57.021K+58.075	sp|P13929|ENOB_HUMAN;sp|P13929-2|ENOB_HUMAN;sp|P13929-3|ENOB_HUMAN	130517848	67882232	7.35251e+06	76108328	14553913	31165692	0	FALSE
+58.075TIAQGNLSNTDVQAAK+58.075	tr|H3BRG4|H3BRG4_HUMAN;sp|P22695|QCR2_HUMAN	16373290	8.35967e+06	1091691	11181096	2.45571e+06	5201737	0	FALSE
+58.075LAASASTQQLQEVK+58.075	sp|O95235|KI20A_HUMAN;sp|O95235-2|KI20A_HUMAN	3.90064e+06	7.26346e+06	5.63153e+06	1.78258e+06	971222	22960118	0	FALSE
+58.075YALQMEQLNGILLHLESELAQTR	tr|F8VZY9|F8VZY9_HUMAN;sp|P05783|K1C18_HUMAN	111167	180229	103079	0	119389	0	0.00237389	FALSE
+58.075MFPAAPSPR	sp|Q8WUM0|NU133_HUMAN	1595215	40508496	18937878	866038	17532402	3278552	0.00237389	FALSE
+58.075VAQGVSGAVQDK+58.075	tr|H0Y4R1|H0Y4R1_HUMAN;sp|P12268|IMDH2_HUMAN	13922132	6656251	523635	7.51195e+06	1.11808e+06	4.30382e+06	0	FALSE
+58.075QTYSTEPNNLK+58.075	tr|H0YLP6|H0YLP6_HUMAN;tr|H0YKD8|H0YKD8_HUMAN;tr|H0YMF4|H0YMF4_HUMAN;sp|P46779|RL28_HUMAN;sp|P46779-2|RL28_HUMAN;sp|P46779-3|RL28_HUMAN;sp|P46779-4|RL28_HUMAN;sp|P46779-5|RL28_HUMAN	17280918	6.30259e+06	4.1643e+06	6.06737e+06	676233	2.76018e+06	0	FALSE
+58.075QTSGGPVDASSEYQQELER	tr|A8MUH2|A8MUH2_HUMAN;sp|P18859|ATP5J_HUMAN;sp|P18859-2|ATP5J_HUMAN	1.87791e+06	740380	826864	1.15095e+06	588676	913023	0	FALSE
+58.075VAASVLNPYVK+58.075	tr|H7C0C1|H7C0C1_HUMAN;sp|P48047|ATPO_HUMAN	5815438	4363690	5307898	5571607	1.19335e+06	4.30311e+06	0.00406622	FALSE
+58.075STPVTVVLPDTK+58.075	sp|Q15029|U5S1_HUMAN;sp|Q15029-2|U5S1_HUMAN;sp|Q15029-3|U5S1_HUMAN	21761752	18088500	7.91311e+06	13630201	9184262	7.39092e+06	0.000399521	FALSE
+58.075VTPPEGYEVVTVFPK+58.075	sp|O00151|PDLI1_HUMAN	861870	495887	327385	494593	198034	403048	0	FALSE
+58.075DGSLASNPYSGDLTK+58.075	tr|H0Y5H6|H0Y5H6_HUMAN;tr|F8W726|F8W726_HUMAN;tr|H7C2T8|H7C2T8_HUMAN;sp|Q14157|UBP2L_HUMAN;sp|Q14157-1|UBP2L_HUMAN;sp|Q14157-3|UBP2L_HUMAN;sp|Q14157-4|UBP2L_HUMAN;sp|Q14157-5|UBP2L_HUMAN	11022998	4.02231e+06	872854	4725951	1.7912e+06	1.31836e+06	0.000399521	FALSE
+58.075IAVAAQNC+57.021YK+58.075	sp|P60174|TPIS_HUMAN;sp|P60174-1|TPIS_HUMAN	35319012	20587544	3.68877e+06	23315658	5.03916e+06	10230823	0	FALSE
+58.075QQLPEQPFEK+58.075	sp|P46087|NOP2_HUMAN;sp|P46087-2|NOP2_HUMAN;sp|P46087-4|NOP2_HUMAN	15211370	7.91519e+06	0	7279674	1589375	3.21277e+06	0	FALSE
+58.075GTPAGTTPGASQAPK+58.075	sp|Q8IVT2|MISP_HUMAN	17931286	8193193	769910	8936981	1.68887e+06	4.61746e+06	0	FALSE
+58.075GTPAGTTPGASQAPK+58.075	sp|Q8IVT2|MISP_HUMAN	11914016	5.77071e+06	422663	5929735	1.1805e+06	3055559	0	FALSE
+58.075AMGIMNSFVNDIFER	tr|U3KQK0|U3KQK0_HUMAN;sp|Q99877|H2B1N_HUMAN;sp|P23527|H2B1O_HUMAN;sp|P57053|H2BFS_HUMAN;sp|P62807|H2B1C_HUMAN;sp|P58876|H2B1D_HUMAN;sp|Q5QNW6|H2B2F_HUMAN;sp|Q5QNW6-2|H2B2F_HUMAN;sp|P06899|H2B1J_HUMAN;sp|O60814|H2B1K_HUMAN;sp|Q16778|H2B2E_HUMAN;sp|Q93079|H2B1H_HUMAN;sp|Q8N257|H2B3B_HUMAN;sp|P33778|H2B1B_HUMAN;sp|Q99880|H2B1L_HUMAN;sp|Q99879|H2B1M_HUMAN	0	733022	272791	595926	53733.4	523897	0.00406622	FALSE
+58.075TITYQAVPSEVPNEEPK+58.075	tr|F8WAE5|F8WAE5_HUMAN;tr|H7C5R5|H7C5R5_HUMAN;sp|Q9BY44|EIF2A_HUMAN;sp|Q9BY44-2|EIF2A_HUMAN;sp|Q9BY44-3|EIF2A_HUMAN;sp|Q9BY44-4|EIF2A_HUMAN	25076472	14088388	1.3222e+06	14186346	2571648	6836212	0.00145402	FALSE
+58.075AAAPAPEEEMDEC+57.021EQALAAEPK+58.075	sp|P26641|EF1G_HUMAN;sp|P26641-2|EF1G_HUMAN	131270808	74750936	8945598	63864484	14665351	27464072	0	FALSE
+58.075SC+57.021C+57.021SC+57.021C+57.021PVGC+57.021AK+58.075	sp|P80297|MT1X_HUMAN;sp|P02795|MT2_HUMAN;sp|P04732|MT1E_HUMAN;sp|Q8N339|MT1M_HUMAN;sp|P13640|MT1G_HUMAN;sp|P13640-2|MT1G_HUMAN	3.83991e+06	1.7561e+06	109667	2.84083e+06	187652	862192	0	FALSE
+58.075TIAPALVSK+58.075	tr|K7ERS8|K7ERS8_HUMAN;tr|K7EM90|K7EM90_HUMAN;tr|A0A2R8Y6I8|A0A2R8Y6I8_HUMAN;tr|A0A2R8Y879|A0A2R8Y879_HUMAN;tr|A0A2R8YEM5|A0A2R8YEM5_HUMAN;sp|P06733|ENOA_HUMAN	4924264	2.73653e+06	1.18678e+06	3.66857e+06	810039	1992184	0.00616419	FALSE
+58.075TQPTSLPK+58.075	tr|E7EVA0|E7EVA0_HUMAN;tr|H7C4C5|H7C4C5_HUMAN;tr|B5MEG9|B5MEG9_HUMAN;sp|P27816|MAP4_HUMAN;sp|P27816-4|MAP4_HUMAN;sp|P27816-5|MAP4_HUMAN;sp|P27816-6|MAP4_HUMAN	6676697	3.40958e+06	521743	4495912	694487	2.60382e+06	0	FALSE
+58.075STNGDTFLGGEDFDQALLR	sp|P38646|GRP75_HUMAN	2.27688e+06	4.13008e+06	1.26321e+06	2.82945e+06	0	0	0.00145402	FALSE
+58.075VIEEQLEPAVEK+58.075	sp|P42704|LPPRC_HUMAN	16525925	7.54983e+06	758381	7537741	1.25601e+06	1304592	0	FALSE
+58.075GC+57.021ALQC+57.021AILSPAFK+58.075	tr|E9PDE8|E9PDE8_HUMAN;tr|A0A087WYC1|A0A087WYC1_HUMAN;tr|A0A087WTS8|A0A087WTS8_HUMAN;tr|D6RJ96|D6RJ96_HUMAN;tr|A0A0A0MSM0|A0A0A0MSM0_HUMAN;sp|O95757|HS74L_HUMAN;sp|Q92598|HS105_HUMAN;sp|Q92598-2|HS105_HUMAN;sp|Q92598-3|HS105_HUMAN;sp|Q92598-4|HS105_HUMAN;sp|P34932|HSP74_HUMAN	1.14468e+06	4.10245e+06	1.59756e+06	1457807	1.58126e+06	757754	0.00237389	FALSE
+58.075LLEAAAQSTK+58.075	tr|H0YDN1|H0YDN1_HUMAN;sp|Q15149|PLEC_HUMAN;sp|Q15149-2|PLEC_HUMAN;sp|Q15149-3|PLEC_HUMAN;sp|Q15149-4|PLEC_HUMAN;sp|Q15149-5|PLEC_HUMAN;sp|Q15149-6|PLEC_HUMAN;sp|Q15149-7|PLEC_HUMAN;sp|Q15149-8|PLEC_HUMAN;sp|Q15149-9|PLEC_HUMAN	2787073	1.12205e+06	130166	1.05106e+06	263520	480962	0	FALSE
+58.075SADGSAPAGEGEGVTLQR	sp|Q01650|LAT1_HUMAN	9865193	5.77489e+06	1.23404e+06	5.76666e+06	4.4815e+06	3718743	0	FALSE
+58.075LDAEPRPPPTQEAA	tr|K7ER00|K7ER00_HUMAN;sp|Q9Y285|SYFA_HUMAN;sp|Q9Y285-2|SYFA_HUMAN	27840636	15343672	1.01726e+06	13008939	2.14947e+06	3.65686e+06	0.00237389	FALSE
+58.075IAVAAQNC+57.021YK+58.075	sp|P60174|TPIS_HUMAN;sp|P60174-1|TPIS_HUMAN	4.32784e+06	1.14935e+06	776941	955720	382738	354191	0.00616419	FALSE
+58.075IVYPTEK+58.075	tr|F6S2S5|F6S2S5_HUMAN;tr|K7ESD6|K7ESD6_HUMAN;sp|Q14847|LASP1_HUMAN;sp|Q14847-2|LASP1_HUMAN	3.93604e+06	3338601	532495	2354505	1.36085e+06	1.40053e+06	0.00237389	FALSE
+58.075LITEDVQGK+58.075	tr|D6RAT0|D6RAT0_HUMAN;tr|D6RG13|D6RG13_HUMAN;tr|H0Y8L7|H0Y8L7_HUMAN;tr|D6RB09|D6RB09_HUMAN;tr|D6RED7|D6RED7_HUMAN;tr|D6RAS7|D6RAS7_HUMAN;tr|D6RGE0|D6RGE0_HUMAN;tr|E9PFI5|E9PFI5_HUMAN;sp|P61247|RS3A_HUMAN	11423104	5.45362e+06	78936.2	5.27312e+06	1.03339e+06	3.52076e+06	0	FALSE
+58.075GINSSNVENQLQATQAAR	tr|J3QLL0|J3QLL0_HUMAN;tr|J3KS65|J3KS65_HUMAN;sp|P52292|IMA1_HUMAN	3.17411e+06	4.38504e+06	1.75478e+06	1.44626e+06	2163478	0	0.00482955	FALSE
+58.075RRRAGAPLGGSGFK+58.075	sp|C9JH25|PRRT4_HUMAN	363752	29197670	10844681	4544708	0	2.96418e+06	0.00642458	FALSE
+58.075VC+57.021EEIAIIPSK+58.075	tr|A0A075B716|A0A075B716_HUMAN;tr|H3BNC9|H3BNC9_HUMAN;tr|H0YN88|H0YN88_HUMAN;tr|H0YN73|H0YN73_HUMAN;sp|P08708|RS17_HUMAN	16002976	7.86047e+06	1.21471e+06	8.25557e+06	4.86278e+06	3.34277e+06	0	FALSE
+58.075AMDSSLQAR	tr|Q5JR91|Q5JR91_HUMAN;sp|Q99661|KIF2C_HUMAN	1.79568e+06	12146730	0	63657.9	139283	0	0.00482955	FALSE
+58.075GSAITGPVAK+58.075	tr|J3KTJ3|J3KTJ3_HUMAN;sp|P62829|RL23_HUMAN	11345687	5229777	1.34831e+06	5632896	944918	3.58299e+06	0	FALSE
+58.075ALPFWNEEIVPQIK+58.075	sp|P18669|PGAM1_HUMAN;sp|P15259|PGAM2_HUMAN;sp|Q8N0Y7|PGAM4_HUMAN	507003	615828	606878	537966	0	66844.3	0.00145402	FALSE
+58.075GDLGIEIPAEK+58.075VFLAQK+58.075	tr|B4DNK4|B4DNK4_HUMAN;tr|H3BR70|H3BR70_HUMAN;tr|H3BTN5|H3BTN5_HUMAN;sp|P14618|KPYM_HUMAN;sp|P14618-2|KPYM_HUMAN;sp|P14618-3|KPYM_HUMAN;sp|P30613|KPYR_HUMAN;sp|P30613-2|KPYR_HUMAN	1.85725e+06	1.22295e+06	678289	1161075	637134	645831	0.00145402	FALSE
+58.075LATQSNEITIPVTFESR	tr|C9J3N8|C9J3N8_HUMAN;sp|P04792|HSPB1_HUMAN	10346955	6063526	4106618	9297710	3.99743e+06	3.91557e+06	0.00482955	FALSE
+58.075LC+57.021PNSTGAEIR	tr|A0A1W2PQS1|A0A1W2PQS1_HUMAN;sp|P35998|PRS7_HUMAN;sp|P35998-2|PRS7_HUMAN	4738157	12620939	97013.8	6785915	819087	2.00525e+06	0.00642458	FALSE
+62.100GALQNIIPASTGAAK+62.100	tr|E7EUT5|E7EUT5_HUMAN;sp|P04406|G3P_HUMAN;sp|P04406-2|G3P_HUMAN	349011296	188334128	20766796	200332320	40399552	88877848	0	FALSE
+58.075C+57.021C+57.021FVYQLHLVR	XXX_tr|F8VWZ8|F8VWZ8_HUMAN	43977860	6467707	18552914	0	1.56041e+06	2840261	0.00217391	TRUE
+58.075VQYPQSQAC+57.021K+58.075	sp|Q14204|DYHC1_HUMAN	1.03406e+06	630189	292763	589545	286076	245519	0.00145402	FALSE
+58.075SNPSAVAGNETPGASTK+58.075	tr|A0A1B0GTW1|A0A1B0GTW1_HUMAN;tr|A0A3B3IS03|A0A3B3IS03_HUMAN;tr|A0A3B3ITE1|A0A3B3ITE1_HUMAN;tr|A0A3B3ISZ5|A0A3B3ISZ5_HUMAN;tr|A0A3B3IRI3|A0A3B3IRI3_HUMAN;tr|A0A2R8YDH4|A0A2R8YDH4_HUMAN;sp|Q9UDY2|ZO2_HUMAN;sp|Q9UDY2-3|ZO2_HUMAN;sp|Q9UDY2-6|ZO2_HUMAN;sp|Q9UDY2-7|ZO2_HUMAN	8.19558e+06	4.31653e+06	633436	4.25342e+06	729363	1.93086e+06	0	FALSE
+58.075AAYPDLENPPLLVTPSQQAK+58.075	tr|E5RJM9|E5RJM9_HUMAN;sp|P54136|SYRC_HUMAN;sp|P54136-2|SYRC_HUMAN	51203428	24684548	1.61733e+06	26411884	5231826	10482850	0	FALSE
+58.075K+58.075C+57.021LK+58.075GYENC+57.021EYSK+58.075	XXX_sp|Q9Y2H8|ZN510_HUMAN	1.16142	13493470	0	0	0	0	0.0059105	TRUE
+58.075DPIPYLPPLEK+58.075	sp|P08621|RU17_HUMAN;sp|P08621-2|RU17_HUMAN;sp|P08621-3|RU17_HUMAN	163587	3.04022e+06	1.91918e+06	2.73725e+06	2.63592e+06	2.30826e+06	0.00237389	FALSE
+58.075VSADAAPDC+57.021PETSNQTPPGPGAAAGPGID	sp|Q9NXH9|TRM1_HUMAN;sp|Q9NXH9-2|TRM1_HUMAN	44297792	23115182	5943430	21733266	4.96522e+06	8712803	0	FALSE
+58.075VAVATPAK+58.075	tr|C9JLB1|C9JLB1_HUMAN;tr|C9JYW2|C9JYW2_HUMAN;tr|C9J1H7|C9J1H7_HUMAN;tr|C9JWL1|C9JWL1_HUMAN;sp|P19338|NUCL_HUMAN	8.08384e+06	3.89277e+06	1.14141e+06	3.69472e+06	2.15567e+06	2.804e+06	0.00237389	FALSE
+58.075AVSEEQQPALK+58.075	tr|F5GYK6|F5GYK6_HUMAN;tr|Q5STZ8|Q5STZ8_HUMAN;sp|Q8NE71|ABCF1_HUMAN;sp|Q8NE71-2|ABCF1_HUMAN	8797546	4563873	896051	4802818	1.92128e+06	2.30794e+06	0.00145402	FALSE
+58.075VQQLVPK+58.075	tr|H7C144|H7C144_HUMAN;tr|F5GXS2|F5GXS2_HUMAN;sp|O43707|ACTN4_HUMAN;sp|O43707-2|ACTN4_HUMAN;sp|O43707-3|ACTN4_HUMAN	12824573	6.03028e+06	465184	6329402	545342	4803750	0.000789266	FALSE
+58.075SSMNPEYDYLFK+58.075	tr|E7END7|E7END7_HUMAN;sp|P62820|RAB1A_HUMAN;sp|P62820-2|RAB1A_HUMAN;sp|P62820-3|RAB1A_HUMAN	99223960	34230648	23222914	1.5599e+06	2.43917e+06	4.0278e+06	0.00145402	FALSE
+58.075NTDQASMPDNTAAQK+58.075	sp|P35749|MYH11_HUMAN;sp|P35749-2|MYH11_HUMAN;sp|P35749-3|MYH11_HUMAN;sp|P35749-4|MYH11_HUMAN;sp|P35579|MYH9_HUMAN;sp|P35579-2|MYH9_HUMAN	3.78406e+06	1.68559e+06	77727.9	1.90265e+06	161955	554130	0	FALSE
+66.125TYDPSGDSTLPTC+57.021SK+66.125	sp|Q9Y2X3|NOP58_HUMAN	10452565	7354365	511318	6.04467e+06	1.58948e+06	2.83355e+06	0	FALSE
+58.075LLLPGELAK+58.075	tr|U3KQK0|U3KQK0_HUMAN;tr|A0A2R8Y619|A0A2R8Y619_HUMAN;sp|Q99877|H2B1N_HUMAN;sp|P23527|H2B1O_HUMAN;sp|P57053|H2BFS_HUMAN;sp|P62807|H2B1C_HUMAN;sp|P58876|H2B1D_HUMAN;sp|Q5QNW6|H2B2F_HUMAN;sp|Q5QNW6-2|H2B2F_HUMAN;sp|P06899|H2B1J_HUMAN;sp|O60814|H2B1K_HUMAN;sp|Q96A08|H2B1A_HUMAN;sp|Q16778|H2B2E_HUMAN;sp|Q93079|H2B1H_HUMAN;sp|Q8N257|H2B3B_HUMAN;sp|P33778|H2B1B_HUMAN;sp|Q99880|H2B1L_HUMAN;sp|Q99879|H2B…	33261042	16846582	1.67148e+06	18215084	3195524	9202090	0.000789266	FALSE
+62.100LGSTAPQVLSTSSPAQQAENEAK+62.100	sp|Q9UNZ2|NSF1C_HUMAN;sp|Q9UNZ2-4|NSF1C_HUMAN;sp|Q9UNZ2-5|NSF1C_HUMAN;sp|Q9UNZ2-6|NSF1C_HUMAN	25025522	11577315	1.93679e+06	13320003	2.60225e+06	9582368	0	FALSE
+58.075VSADAAPDC+57.021PETSNQTPPGPGAAAGPGID	sp|Q9NXH9|TRM1_HUMAN;sp|Q9NXH9-2|TRM1_HUMAN	44247464	23243054	6.48059e+06	21408432	5134544	8730510	0	FALSE
+58.075ILGADTSVDLEETGRVLSIGDGIAR	tr|K7EQH4|K7EQH4_HUMAN;tr|K7EK77|K7EK77_HUMAN;tr|K7ERX7|K7ERX7_HUMAN;tr|K7EJP1|K7EJP1_HUMAN;sp|P25705|ATPA_HUMAN;sp|P25705-2|ATPA_HUMAN;sp|P25705-3|ATPA_HUMAN	2306544	1.46218e+06	437295	1.76653e+06	1.02269e+06	933602	0.00145402	FALSE
+66.125AAPTAASDQPDSAATTEK+66.125	sp|Q9BRP8|PYM1_HUMAN;sp|Q9BRP8-2|PYM1_HUMAN	29310570	14998310	1.37988e+06	15417520	3.07945e+06	6119253	0	FALSE
+66.125LLQDSVDFSLADAINTEFK+66.125NTR	tr|B0YJC4|B0YJC4_HUMAN;tr|A0A1B0GVG8|A0A1B0GVG8_HUMAN;tr|A0A1B0GTT5|A0A1B0GTT5_HUMAN;sp|P08670|VIME_HUMAN	14942796	7491846	722098	7461800	1.66206e+06	2.73759e+06	0	FALSE
+58.075NSSYFVEWIPNNVK+58.075	tr|Q5ST81|Q5ST81_HUMAN;tr|Q5JP53|Q5JP53_HUMAN;tr|K7ESM5|K7ESM5_HUMAN;tr|A0A0B4J269|A0A0B4J269_HUMAN;sp|Q9BUF5|TBB6_HUMAN;sp|P04350|TBB4A_HUMAN;sp|P07437|TBB5_HUMAN;sp|Q13885|TBB2A_HUMAN;sp|Q13509|TBB3_HUMAN;sp|Q13509-2|TBB3_HUMAN;sp|P68371|TBB4B_HUMAN;sp|Q9BVA1|TBB2B_HUMAN	0	1.35618e+06	1.84114e+06	2.32407e+06	2253612	0	0.00237389	FALSE
+58.075AQEPSAAIPK+58.075	sp|Q15459|SF3A1_HUMAN	23359568	11332693	1142313	11588189	2.74689e+06	7106692	0.00536572	FALSE
+62.100QAASSLQQASLK+62.100	sp|P38646|GRP75_HUMAN	61800128	30943244	3.02249e+06	34139352	6.55952e+06	23517776	0	FALSE
+62.100AGYSQGATQYTQAQQTR	sp|Q96KR1|ZFR_HUMAN	469527	177109	324183	244725	202815	102777	0.00145402	FALSE
+58.075STGGAPTFNVTVTK+58.075	tr|K7EJ44|K7EJ44_HUMAN;sp|P07737|PROF1_HUMAN	46296556	23464586	1.62264e+06	25040354	5.21483e+06	13051826	0	FALSE
+66.125TTTLSGTAPAAGVVPSR	tr|E7EVA0|E7EVA0_HUMAN;tr|F8W9U4|F8W9U4_HUMAN;tr|H7C4C5|H7C4C5_HUMAN;tr|B5MEG9|B5MEG9_HUMAN;tr|H0Y2V1|H0Y2V1_HUMAN;sp|P27816|MAP4_HUMAN;sp|P27816-2|MAP4_HUMAN;sp|P27816-4|MAP4_HUMAN;sp|P27816-5|MAP4_HUMAN;sp|P27816-6|MAP4_HUMAN	34402720	18421974	10542652	20434726	20821214	9633992	0	FALSE
+66.125VVDLLAPYAK+66.125	tr|F8W079|F8W079_HUMAN;tr|H0YH81|H0YH81_HUMAN;sp|P06576|ATPB_HUMAN	3.74773e+06	1.73296e+06	962517	2.12201e+06	1.21036e+06	1536237	0	FALSE
+60.088NAVITVPAYFNDSQR	sp|P38646|GRP75_HUMAN	824514	0	12824336	1.48662e+06	4769851	1.74042e+06	0	FALSE
+60.088NAVITVPAYFNDSQR	sp|P38646|GRP75_HUMAN	10970776	25917710	10840684	7.61044e+06	11444693	3.16655e+06	0	FALSE
+60.088SQSPAASDC+57.021SSSSSSASLPSSGR	tr|C9JFK9|C9JFK9_HUMAN;sp|O95817|BAG3_HUMAN	2.21575e+06	996624	16533	1.19622e+06	296765	473169	0	FALSE
+60.088QQAAYYAQTSPQGM+15.995PQHPPAPQGQ	sp|Q96AE4|FUBP1_HUMAN	11126582	6.54007e+06	551191	8571681	1.10375e+06	3.47924e+06	0	FALSE
+62.100AVAGDASESALLK+62.100	sp|P05023|AT1A1_HUMAN;sp|P05023-2|AT1A1_HUMAN;sp|P05023-3|AT1A1_HUMAN;sp|P05023-4|AT1A1_HUMAN	10772384	6.23689e+06	3.71968e+06	22202236	8584436	7734353	0.00237389	FALSE
+62.100LASPSGSTSSGLEVVAPEGTSAPGGGPGTLDDSATIC+57.021R	tr|M0R0K9|M0R0K9_HUMAN;sp|Q13263|TIF1B_HUMAN;sp|Q13263-2|TIF1B_HUMAN	2.52018e+06	3.56355e+06	579567	2.7994e+06	281357	2277033	0	FALSE
+62.100TTTLSGTAPAAGVVPSR	tr|E7EVA0|E7EVA0_HUMAN;tr|F8W9U4|F8W9U4_HUMAN;tr|H7C4C5|H7C4C5_HUMAN;tr|B5MEG9|B5MEG9_HUMAN;tr|H0Y2V1|H0Y2V1_HUMAN;sp|P27816|MAP4_HUMAN;sp|P27816-2|MAP4_HUMAN;sp|P27816-4|MAP4_HUMAN;sp|P27816-5|MAP4_HUMAN;sp|P27816-6|MAP4_HUMAN	33486958	18788182	9638716	16672365	14246705	10513552	0	FALSE
+62.100AAAAAAAAVPSAGPAGPAPTSAAGR	sp|Q9Y4H2|IRS2_HUMAN	13692293	6.73027e+06	897541	7.55152e+06	1.98976e+06	2.94834e+06	0	FALSE
+62.100VLQATVVAVGSGSK+62.100	tr|S4R3N1|S4R3N1_HUMAN;tr|B8ZZL8|B8ZZL8_HUMAN;sp|P61604|CH10_HUMAN	45288664	22614900	1.76381e+06	23936422	3015157	13826357	0	FALSE
+62.100C+57.021TGGEVGATSALAPK+62.100	sp|P30050|RL12_HUMAN;sp|P30050-2|RL12_HUMAN	87582416	45682324	5.34903e+06	46155132	7042154	20545990	0	FALSE
+62.100EAAENSLVAYK+62.100	tr|K7EM20|K7EM20_HUMAN;sp|P62258|1433E_HUMAN;sp|P62258-2|1433E_HUMAN	16087940	9496102	2.47299e+06	8080600	1.26415e+06	3704909	0	FALSE
+62.100TK+62.100VHAELADVLTEAVVDSILAIK+62.100K+62.100	sp|P40227|TCPZ_HUMAN;sp|P40227-2|TCPZ_HUMAN	16710758	10613091	1.36444e+06	10266633	2.90101e+06	4.9655e+06	0	FALSE
+62.100YALQM+15.995EQLNGILLHLESELAQTR	tr|F8VZY9|F8VZY9_HUMAN;sp|P05783|K1C18_HUMAN	0	634896	213652	1.27026e+06	0	1.01617e+06	0	FALSE
+62.100VPSLTTVPQTQGQTTAQK+62.100	sp|Q9BW19|KIFC1_HUMAN	6783085	2.83443e+06	353028	2.12918e+06	564273	903445	0	FALSE
+62.100VDQIQEIVTGNPTVIK+62.100	tr|H0YLE8|H0YLE8_HUMAN;tr|A0A0J9YXZ5|A0A0J9YXZ5_HUMAN;sp|P46940|IQGA1_HUMAN	7121210	4.59563e+06	1.09215e+06	4686265	228093	2.33291e+06	0	FALSE
+62.100VLVEPDAGAGVAVMK+62.100	sp|P42126|ECI1_HUMAN;sp|P42126-2|ECI1_HUMAN	3.7618e+06	1.61293e+06	1.31405e+06	1.39355e+06	720228	1.41347e+06	0	FALSE
+62.100LASPSGSTSSGLEVVAPEGTSAPGGGPGTLDDSATIC+57.021R	tr|M0R0K9|M0R0K9_HUMAN;sp|Q13263|TIF1B_HUMAN;sp|Q13263-2|TIF1B_HUMAN	2.53574e+06	3308921	805140	2.65577e+06	220442	2321929	0	FALSE
+62.100TITYQAVPSEVPNEEPK+62.100	tr|F8WAE5|F8WAE5_HUMAN;tr|H7C5R5|H7C5R5_HUMAN;sp|Q9BY44|EIF2A_HUMAN;sp|Q9BY44-2|EIF2A_HUMAN;sp|Q9BY44-3|EIF2A_HUMAN;sp|Q9BY44-4|EIF2A_HUMAN	10035377	6.13047e+06	0	6.84159e+06	1.07684e+06	4.13909e+06	0	FALSE
+62.100AQAAAPASVPAQAPK+62.100	tr|A0A3B3ITT5|A0A3B3ITT5_HUMAN;sp|P47914|RL29_HUMAN	936509824	454425440	47429740	440851168	78656512	200977728	0	FALSE
+62.100AAPTAASDQPDSAATTEK+62.100	sp|Q9BRP8|PYM1_HUMAN;sp|Q9BRP8-2|PYM1_HUMAN	5.27335e+06	2.55525e+06	201097	2.64914e+06	434926	1.22511e+06	0	FALSE
+62.100TVVAPSAVAGK+62.100	sp|Q9NX14|NDUBB_HUMAN;sp|Q9NX14-2|NDUBB_HUMAN	22160410	12166856	917739	13291509	2.08478e+06	8.0993e+06	0	FALSE
+62.100TK+62.100VHAELADVLTEAVVDSILAIK+62.100K+62.100	sp|P40227|TCPZ_HUMAN;sp|P40227-2|TCPZ_HUMAN	16461669	10876809	481314	10212441	863255	4710353	0	FALSE
+62.100QVLVAPGNAGTAC+57.021SEK+62.100	tr|C9JKQ7|C9JKQ7_HUMAN;tr|C9JZG2|C9JZG2_HUMAN;tr|C9JBJ1|C9JBJ1_HUMAN;tr|C9JTV6|C9JTV6_HUMAN;tr|F8WD69|F8WD69_HUMAN;sp|P22102|PUR2_HUMAN;sp|P22102-2|PUR2_HUMAN	12850427	5.73331e+06	324914	6676344	837181	1.62489e+06	0	FALSE
+62.100GSVGAVPSGTSPGGVATTAAAGSR	sp|Q6ZNB6|NFXL1_HUMAN;sp|Q6ZNB6-2|NFXL1_HUMAN	11327155	2.5862e+06	13347451	7.98064e+06	24031056	0	0	FALSE
+62.100IIYGGSVTGATC+57.021K+62.100	sp|P60174|TPIS_HUMAN;sp|P60174-1|TPIS_HUMAN;sp|P60174-4|TPIS_HUMAN	18974364	6.77149e+06	0	8.3095e+06	1318046	5213572	0	FALSE
+62.100ADTQTYQPYNK+62.100	sp|P84090|ERH_HUMAN	571582	356175	85506.5	408659	84414.3	219159	0.00668896	FALSE
+62.100DAQDVQASQAEADQQQTR	tr|A0A087WVV2|A0A087WVV2_HUMAN;tr|F8W7S5|F8W7S5_HUMAN;sp|Q9P2E9|RRBP1_HUMAN;sp|Q9P2E9-3|RRBP1_HUMAN	5.49762e+06	2.90099e+06	264557	2.82456e+06	563511	957043	0	FALSE
+62.100VTEAPC+57.021YPGAPSTEASGQTGPQEPTSARA	sp|P40222|TXLNA_HUMAN	28618142	14163127	3037816	12891587	1.72313e+06	7500310	0	FALSE
+62.100VM+15.995TIPYQPM+15.995PASSPVIC+57.021AGGQDR	sp|Q15365|PCBP1_HUMAN	9041236	3.21692e+06	2.70818e+06	3.96986e+06	1.26609e+06	3.44145e+06	0	FALSE
+62.100GAEAANVTGPGGVPVQGSK+62.100	tr|H0Y449|H0Y449_HUMAN;sp|P67809|YBOX1_HUMAN	51882068	27656344	2.51815e+06	27306144	5.22744e+06	15510299	0	FALSE
+62.100AM+15.995GIMNSFVNDIFER	tr|U3KQK0|U3KQK0_HUMAN;sp|Q99877|H2B1N_HUMAN;sp|P23527|H2B1O_HUMAN;sp|P57053|H2BFS_HUMAN;sp|P62807|H2B1C_HUMAN;sp|P58876|H2B1D_HUMAN;sp|Q5QNW6|H2B2F_HUMAN;sp|Q5QNW6-2|H2B2F_HUMAN;sp|P06899|H2B1J_HUMAN;sp|O60814|H2B1K_HUMAN;sp|Q16778|H2B2E_HUMAN;sp|Q93079|H2B1H_HUMAN;sp|Q8N257|H2B3B_HUMAN;sp|P33778|H2B1B_HUMAN;sp|Q99880|H2B1L_HUMAN;sp|Q99879|H2B1M_HUMAN	903135	221432	310340	390481	102584	359977	0	FALSE
+62.100MDSTEPPYSQK+62.100	tr|A0A087WV01|A0A087WV01_HUMAN;sp|Q5VTE0|EF1A3_HUMAN;sp|P68104|EF1A1_HUMAN	11609925	9189847	904257	19265438	6.40528e+06	3.32241e+06	0	FALSE
+66.125VTAQGPGLEPSGNIANK+66.125	tr|Q60FE5|Q60FE5_HUMAN;tr|F8WE98|F8WE98_HUMAN;tr|A0A087WWY3|A0A087WWY3_HUMAN;sp|P21333|FLNA_HUMAN;sp|P21333-2|FLNA_HUMAN	25306014	12101129	1.8002e+06	13750320	4574493	5916793	0	FALSE
+62.100STSAPQM+15.995SPGSSDNQSSSPQPAQQK+62.100	tr|F8W726|F8W726_HUMAN;sp|Q14157|UBP2L_HUMAN;sp|Q14157-1|UBP2L_HUMAN;sp|Q14157-3|UBP2L_HUMAN;sp|Q14157-4|UBP2L_HUMAN;sp|Q14157-5|UBP2L_HUMAN	5.19583e+06	2.89229e+06	322235	2.62859e+06	547153	1.1517e+06	0	FALSE
+62.100AGTGVDNVDLEAATR	tr|A0A286YFM8|A0A286YFM8_HUMAN;tr|A0A286YFA2|A0A286YFA2_HUMAN;tr|A0A286YFC8|A0A286YFC8_HUMAN;tr|A0A2C9F2M7|A0A2C9F2M7_HUMAN;tr|A0A286YF22|A0A286YF22_HUMAN;tr|A0A286YFL2|A0A286YFL2_HUMAN;tr|A0A286YER3|A0A286YER3_HUMAN;tr|A0A286YFB2|A0A286YFB2_HUMAN;sp|O43175|SERA_HUMAN	25101842	10998867	102775	12724616	2166351	5379362	0	FALSE
+62.100STGGAPTFNVTVTK+62.100	tr|K7EJ44|K7EJ44_HUMAN;sp|P07737|PROF1_HUMAN	48843004	23444682	1.77919e+06	25776324	5.19223e+06	11697885	0	FALSE
+62.100NC+57.021IAQTSAVVK+62.100	tr|C9JQ41|C9JQ41_HUMAN;tr|H7C525|H7C525_HUMAN;sp|Q4VC31|CCD58_HUMAN	8207719	3.22191e+06	449203	4584808	1.18534e+06	2.03211e+06	0	FALSE
+62.100IINEPTAAAIAYGLDK+62.100	tr|E9PKE3|E9PKE3_HUMAN;tr|E9PI65|E9PI65_HUMAN;tr|E9PLF4|E9PLF4_HUMAN;tr|E9PN89|E9PN89_HUMAN;tr|Q53FA3|Q53FA3_HUMAN;sp|P11021|BIP_HUMAN;sp|P54652|HSP72_HUMAN;sp|P11142|HSP7C_HUMAN;sp|P11142-2|HSP7C_HUMAN;sp|P34931|HS71L_HUMAN	492479	2.13108e+06	4517011	1.52533e+06	1.98292e+06	2.26619e+06	0	FALSE
+62.100AGAIAPC+57.021EVTVPAQNTGLGPEK+62.100	tr|G3V210|G3V210_HUMAN;tr|F8VRK7|F8VRK7_HUMAN;tr|F8VPE8|F8VPE8_HUMAN;tr|F8VWS0|F8VWS0_HUMAN;tr|F8VU65|F8VU65_HUMAN;tr|F8VQY6|F8VQY6_HUMAN;tr|F8VW21|F8VW21_HUMAN;sp|P05388|RLA0_HUMAN;sp|P05388-2|RLA0_HUMAN;sp|Q8NHW5|RLA0L_HUMAN	37652096	17895666	1.67538e+06	19662492	4.73426e+06	8933522	0	FALSE
+62.100ETLPAEQDLTTK+62.100	tr|F5GX11|F5GX11_HUMAN;sp|P25786|PSA1_HUMAN;sp|P25786-2|PSA1_HUMAN	15380612	8542910	4.94653e+06	8721971	1.28379e+06	6.17825e+06	0	FALSE
+62.100EVDEQMLNVQNK+62.100	tr|Q5ST81|Q5ST81_HUMAN;tr|Q5JP53|Q5JP53_HUMAN;sp|P07437|TBB5_HUMAN;sp|Q13885|TBB2A_HUMAN;sp|P68371|TBB4B_HUMAN;sp|Q9BVA1|TBB2B_HUMAN	6131329	3555227	683684	4.01596e+06	545225	1.41751e+06	0	FALSE
+62.100LAYINPDLALEEK+62.100	sp|P31948|STIP1_HUMAN;sp|P31948-2|STIP1_HUMAN;sp|P31948-3|STIP1_HUMAN	4.41956e+06	3265379	1.51616e+06	4358089	2.90205e+06	4758867	0	FALSE
+62.100LLQDSVDFSLADAINTEFK+62.100NTR	tr|B0YJC4|B0YJC4_HUMAN;tr|A0A1B0GVG8|A0A1B0GVG8_HUMAN;tr|A0A1B0GTT5|A0A1B0GTT5_HUMAN;sp|P08670|VIME_HUMAN	14576559	7.74367e+06	968839	7115985	1.03641e+06	2.97306e+06	0	FALSE
+62.100LYGSAGPPPTGEEDTAEK+62.100DEL	sp|P11021|BIP_HUMAN	385332032	205378192	25805446	198922320	30408184	105010088	0	FALSE
+62.100LVQDVANNTNEEAGDGTTTATVLAR	tr|E7EXB4|E7EXB4_HUMAN;tr|C9JL25|C9JL25_HUMAN;tr|E7ESH4|E7ESH4_HUMAN;sp|P10809|CH60_HUMAN;sp|P10809-2|CH60_HUMAN	39951480	20274966	2.6572e+06	22439422	4921576	11106647	0	FALSE
+62.100AGAIAPC+57.021EVTVPAQNTGLGPEK+62.100	tr|G3V210|G3V210_HUMAN;tr|F8VRK7|F8VRK7_HUMAN;tr|F8VPE8|F8VPE8_HUMAN;tr|F8VWS0|F8VWS0_HUMAN;tr|F8VU65|F8VU65_HUMAN;tr|F8VQY6|F8VQY6_HUMAN;tr|F8VW21|F8VW21_HUMAN;sp|P05388|RLA0_HUMAN;sp|P05388-2|RLA0_HUMAN;sp|Q8NHW5|RLA0L_HUMAN	402647040	240967408	28682526	238387456	54720592	118018872	0	FALSE
+62.100GSYGDLGGPIITTQVTIPK+62.100	tr|Q5T6W2|Q5T6W2_HUMAN;tr|S4R359|S4R359_HUMAN;sp|P61978|HNRPK_HUMAN;sp|P61978-2|HNRPK_HUMAN;sp|P61978-3|HNRPK_HUMAN	3.22876e+06	1.49702e+06	0	1.58021e+06	0	646928	0	FALSE
+62.100TQPSSGVDSAVGTLPATSPQSTSVQAK+62.100	sp|Q13428|TCOF_HUMAN;sp|Q13428-2|TCOF_HUMAN;sp|Q13428-3|TCOF_HUMAN;sp|Q13428-4|TCOF_HUMAN;sp|Q13428-8|TCOF_HUMAN	48883288	27203718	3.21505e+06	28366138	4597974	9072817	0	FALSE
+62.100NQLTSNPENTVFDAK+62.100	sp|P11021|BIP_HUMAN	11474326	4.38124e+06	1.71607e+06	5.79051e+06	2.09735e+06	2542693	0	FALSE
+62.100AAYPDLENPPLLVTPSQQAK+62.100	tr|E5RJM9|E5RJM9_HUMAN;sp|P54136|SYRC_HUMAN;sp|P54136-2|SYRC_HUMAN	10447318	4645970	854051	5.61116e+06	1.84857e+06	3061242	0	FALSE
+62.100YALYDATYETK+62.100	tr|G3V1A4|G3V1A4_HUMAN;tr|E9PLJ3|E9PLJ3_HUMAN;tr|E9PQB7|E9PQB7_HUMAN;tr|E9PP50|E9PP50_HUMAN;tr|E9PK25|E9PK25_HUMAN;sp|P23528|COF1_HUMAN;sp|Q9Y281|COF2_HUMAN;sp|Q9Y281-3|COF2_HUMAN	5.6948e+06	2.75041e+06	1.58207e+06	3363550	790514	1.00676e+06	0	FALSE
+62.100QQAAYYAQTSPQGM+15.995PQHPPAPQGQ	sp|Q96AE4|FUBP1_HUMAN	11648089	6396020	570322	8596845	1008761	3.40686e+06	0	FALSE
+62.100SC+57.021GSSTPDEFPTDIPGTK+62.100	tr|H7BZU1|H7BZU1_HUMAN;sp|P41091|IF2G_HUMAN	16868994	8.24332e+06	709308	8930412	2.05782e+06	1.47318e+06	0	FALSE
+62.100NQVALNPQNTVFDAK+62.100	tr|A0A0G2JIW1|A0A0G2JIW1_HUMAN;sp|P0DMV9|HS71B_HUMAN;sp|P0DMV8|HS71A_HUMAN;sp|P0DMV8-2|HS71A_HUMAN	11447981	5739621	981897	4.71668e+06	1.51374e+06	2.50898e+06	0	FALSE
+62.100ELAQQVQQVADDYGK+62.100	tr|A0A1X7SBZ2|A0A1X7SBZ2_HUMAN;tr|A0A1W2PQ51|A0A1W2PQ51_HUMAN;sp|Q92841|DDX17_HUMAN;sp|Q92841-1|DDX17_HUMAN;sp|Q92841-2|DDX17_HUMAN;sp|Q92841-3|DDX17_HUMAN	1.84928e+06	1.17069e+06	953604	1.19201e+06	282050	656204	0	FALSE
+62.100VTEAPC+57.021YPGAPSTEASGQTGPQEPTSARA	sp|P40222|TXLNA_HUMAN	26173840	13414312	3.63515e+06	11971063	2.66802e+06	5.90981e+06	0	FALSE
+62.100QAVTNPNNTFYATK+62.100	tr|D6RA73|D6RA73_HUMAN;tr|D6RJI2|D6RJI2_HUMAN;tr|A0A3B3ITI4|A0A3B3ITI4_HUMAN;sp|P38646|GRP75_HUMAN	33785940	16974874	619545	20906158	2.07503e+06	12917907	0	FALSE
+62.100FSNSIPQSQTGNSETATPTNVDLPQVIPK+62.100	sp|P46087|NOP2_HUMAN;sp|P46087-2|NOP2_HUMAN;sp|P46087-4|NOP2_HUMAN	1369765	1.40377e+06	703785	751936	1.01897e+06	556574	0	FALSE
+62.100AAAAAAALQAK+62.100	tr|H3BM89|H3BM89_HUMAN;tr|H3BU31|H3BU31_HUMAN;sp|P36578|RL4_HUMAN	27880192	14394974	1.48994e+06	15643819	3071454	8911725	0	FALSE
+62.100VMTIPYQPM+15.995PASSPVIC+57.021AGGQDR	sp|Q15365|PCBP1_HUMAN	0	3.92689e+06	1.25105e+06	5549738	17569834	9992297	0	FALSE
+62.100SQEATEAAPSC+57.021VGDM+15.995ADTPR	tr|K7EJL9|K7EJL9_HUMAN;tr|K7ER14|K7ER14_HUMAN;sp|Q9UHD8|SEPT9_HUMAN;sp|Q9UHD8-2|SEPT9_HUMAN;sp|Q9UHD8-3|SEPT9_HUMAN;sp|Q9UHD8-5|SEPT9_HUMAN;sp|Q9UHD8-7|SEPT9_HUMAN	5601452	2944494	90233.4	2.47732e+06	536686	985858	0	FALSE
+62.100GC+57.021ITIIGGGDTATC+57.021C+57.021AK+62.100	sp|P00558|PGK1_HUMAN;sp|P00558-2|PGK1_HUMAN	27555136	15195605	3.6914e+06	15516550	5317379	7012898	0	FALSE
+62.100AFLADPSAFVAAAPVAAATTAAPAAAAAPAK+62.100	tr|F8VWS0|F8VWS0_HUMAN;tr|F8W1K8|F8W1K8_HUMAN;sp|P05388|RLA0_HUMAN;sp|P05388-2|RLA0_HUMAN	137561	69967.6	180224	394116	278825	275523	0	FALSE
+62.100ESTGAQVQVAGDM+15.995LPNSTER	tr|E9PFP8|E9PFP8_HUMAN;tr|F8VZX2|F8VZX2_HUMAN;tr|F8VXH9|F8VXH9_HUMAN;tr|F8W0G4|F8W0G4_HUMAN;tr|J3QT27|J3QT27_HUMAN;tr|H3BRU6|H3BRU6_HUMAN;sp|Q15366|PCBP2_HUMAN;sp|Q15366-2|PCBP2_HUMAN;sp|Q15366-3|PCBP2_HUMAN;sp|Q15366-4|PCBP2_HUMAN;sp|Q15366-5|PCBP2_HUMAN;sp|Q15366-6|PCBP2_HUMAN;sp|Q15366-7|PCBP2_HUMAN;sp|Q15366-8|PCBP2_HUMAN;sp|Q15365|PCBP1_HUMAN;sp|P57721|PCBP3_HUMAN;sp|P57721-2|PCBP3_HUMAN;sp|…	21813424	11255376	1.23308e+06	11285069	2.60083e+06	5396865	0	FALSE
+62.100AAGVNVEPFWPGLFAK+62.100	sp|P05386|RLA1_HUMAN	1.13448e+06	631637	806001	2.25333e+06	0	1.3896e+06	0	FALSE
+62.100LAETQEEISAEVAAK+62.100	tr|A0A0A6YYJ8|A0A0A6YYJ8_HUMAN;sp|Q96HJ9-2|FMC1_HUMAN;sp|Q9Y383|LC7L2_HUMAN;sp|Q9Y383-2|LC7L2_HUMAN;sp|Q9Y383-3|LC7L2_HUMAN	2.77038e+06	5.08681e+06	0	11860044	0	0	0	FALSE
+62.100ATQLQGDEEPSAPPTSTQAQQK+62.100	tr|A0A140T947|A0A140T947_HUMAN;sp|O60231|DHX16_HUMAN	28303464	16865400	556772	13778685	1.50474e+06	5.39344e+06	0	FALSE
+62.100GC+57.021EVTPDVNISGQK+62.100	tr|A0A0U1RRM8|A0A0U1RRM8_HUMAN;tr|H0YJ34|H0YJ34_HUMAN;sp|Q96AC1|FERM2_HUMAN;sp|Q96AC1-2|FERM2_HUMAN;sp|Q96AC1-3|FERM2_HUMAN	9645749	4.88234e+06	627041	1644181	761666	998318	0	FALSE
+62.100SAVTTVVNPK+62.100	sp|P05556|ITB1_HUMAN	7.50587e+06	4.95808e+06	1.73224e+06	6144879	3989863	4.94999e+06	0	FALSE
+62.100LYGSAGPPPTGEEDTAEK+62.100DEL	sp|P11021|BIP_HUMAN	174603328	101594424	11557233	96240472	18211878	54210048	0	FALSE
+62.100SSDASTAQPPESQPLPASQTPASNQPK+62.100	sp|P48634|PRC2A_HUMAN;sp|P48634-2|PRC2A_HUMAN;sp|P48634-3|PRC2A_HUMAN;sp|P48634-4|PRC2A_HUMAN	16252882	8883429	2.09296e+06	7632107	3.57968e+06	2.59166e+06	0	FALSE
+62.100SGDSEVYQLGDVSQK+62.100	tr|A0A0G2JLD8|A0A0G2JLD8_HUMAN;tr|E7EUY5|E7EUY5_HUMAN;tr|C9K0U8|C9K0U8_HUMAN;sp|Q04837|SSBP_HUMAN	12895367	7083189	13751108	6839614	655579	3.47398e+06	0	FALSE
+62.100QAVLGAGLPISTPC+57.021TTINK+62.100	tr|E9PKF3|E9PKF3_HUMAN;tr|H0YEL7|H0YEL7_HUMAN;sp|P24752|THIL_HUMAN;sp|P24752-2|THIL_HUMAN	1.0483e+06	673260	277698	929143	0	0	0	FALSE
+62.100SC+57.021MLTGTPESVQSAK+62.100	tr|C9JSZ1|C9JSZ1_HUMAN;tr|E9PEB5|E9PEB5_HUMAN;sp|Q96AE4|FUBP1_HUMAN;sp|Q96AE4-2|FUBP1_HUMAN	3.3756e+06	1.28694e+06	5.10619e+06	6.42892e+06	200509	704474	0	FALSE
+62.100EEAAAVPAAAPDDLALLK+62.100	tr|E5RJU9|E5RJU9_HUMAN;sp|Q86UE4|LYRIC_HUMAN	4703424	2.15748e+06	218498	1.05174e+06	239207	1.06828e+06	0.00237389	FALSE
+62.100NM+15.995GGPYGGGNYGPGGSGGSGGYGGR	sp|P22626|ROA2_HUMAN;sp|P22626-2|ROA2_HUMAN	14715999	3.59948e+06	26012010	0	7.86196e+06	0	0	FALSE
+62.100STC+57.021IYGGAPK+62.100	tr|A0A1X7SBZ2|A0A1X7SBZ2_HUMAN;tr|J3KTA4|J3KTA4_HUMAN;tr|J3KRZ1|J3KRZ1_HUMAN;tr|J3QRQ7|J3QRQ7_HUMAN;tr|A0A1W2PQ51|A0A1W2PQ51_HUMAN;sp|P17844|DDX5_HUMAN;sp|P17844-2|DDX5_HUMAN;sp|Q92841|DDX17_HUMAN;sp|Q92841-1|DDX17_HUMAN;sp|Q92841-2|DDX17_HUMAN;sp|Q92841-3|DDX17_HUMAN	7.9611e+06	3.97339e+06	400985	4266044	0	5233416	0	FALSE
+62.100VLDNYLTSPLPEEVDETSAEDEGVSQR	sp|O00299|CLIC1_HUMAN	1.10355e+06	2511568	106406	874678	0	425390	0	FALSE
+62.100QVMVVPVGPTC+57.021DEYAQK+62.100	sp|P26639|SYTC_HUMAN;sp|P26639-2|SYTC_HUMAN	19026224	9209620	747194	9845431	1.434e+06	3245944	0	FALSE
+62.100SSSSVTTSETQPC+57.021TPSSSDYSDLQR	tr|K7EM16|K7EM16_HUMAN;sp|P50552|VASP_HUMAN	4713782	3613854	202603	2.71945e+06	549230	1.60277e+06	0	FALSE
+62.100NTDQASM+15.995PDNTAAQK+62.100	sp|P35749|MYH11_HUMAN;sp|P35749-2|MYH11_HUMAN;sp|P35749-3|MYH11_HUMAN;sp|P35749-4|MYH11_HUMAN;sp|P35579|MYH9_HUMAN;sp|P35579-2|MYH9_HUMAN	2.50392e+06	1.4023e+06	0	1.28924e+06	460303	295651	0	FALSE
+62.100SPAVATSTAAPPPPSSPLPSK+62.100	tr|F8W726|F8W726_HUMAN;sp|Q14157|UBP2L_HUMAN;sp|Q14157-1|UBP2L_HUMAN;sp|Q14157-3|UBP2L_HUMAN;sp|Q14157-4|UBP2L_HUMAN;sp|Q14157-5|UBP2L_HUMAN	36301512	18457500	1.06824e+06	19181408	3.44003e+06	9353130	0.00145402	FALSE
+62.100SSDASTAQPPESQPLPASQTPASNQPK+62.100	sp|P48634|PRC2A_HUMAN;sp|P48634-2|PRC2A_HUMAN;sp|P48634-3|PRC2A_HUMAN;sp|P48634-4|PRC2A_HUMAN	17361946	8.30003e+06	828956	7.73098e+06	3441495	2.51056e+06	0	FALSE
+62.100QVM+15.995VVPVGPTC+57.021DEYAQK+62.100	sp|P26639|SYTC_HUMAN;sp|P26639-2|SYTC_HUMAN	17356422	10994664	3149847	7258042	2422865	2.52531e+06	0	FALSE
+62.100TAVDSGIPLLTNFQVTK+62.100	sp|P31327|CPSM_HUMAN;sp|P31327-2|CPSM_HUMAN;sp|P31327-3|CPSM_HUMAN	649638	305502	180314	385586	0	168377	0.00237389	FALSE
+62.100NQVAM+15.995NPTNTVFDAK+62.100	tr|E9PN25|E9PN25_HUMAN;tr|E9PKE3|E9PKE3_HUMAN;tr|E9PNE6|E9PNE6_HUMAN;tr|E9PQQ4|E9PQQ4_HUMAN;tr|E9PLF4|E9PLF4_HUMAN;tr|E9PPY6|E9PPY6_HUMAN;tr|E9PK54|E9PK54_HUMAN;tr|E9PQK7|E9PQK7_HUMAN;sp|P11142|HSP7C_HUMAN;sp|P11142-2|HSP7C_HUMAN	23429646	10811303	950706	10743589	2.88606e+06	6.89067e+06	0	FALSE
+62.100TDYNASVSVPDSSGPER	tr|Q5T6W2|Q5T6W2_HUMAN;sp|P61978|HNRPK_HUMAN;sp|P61978-2|HNRPK_HUMAN;sp|P61978-3|HNRPK_HUMAN	17154546	15357545	2.64031e+06	12446238	2.44632e+06	5.30923e+06	0	FALSE
+62.100NQVALNPQNTVFDAK+62.100	tr|A0A0G2JIW1|A0A0G2JIW1_HUMAN;sp|P0DMV9|HS71B_HUMAN;sp|P0DMV8|HS71A_HUMAN;sp|P0DMV8-2|HS71A_HUMAN	26445504	12074217	4225791	13155642	0	7.62735e+06	0	FALSE
+62.100TSSAETPTIPLGSAVEAIK+62.100	tr|H7C463|H7C463_HUMAN;tr|B9A067|B9A067_HUMAN;tr|C9J406|C9J406_HUMAN;sp|Q16891|MIC60_HUMAN;sp|Q16891-2|MIC60_HUMAN;sp|Q16891-3|MIC60_HUMAN;sp|Q16891-4|MIC60_HUMAN	12866091	6956689	1064253	6.32216e+06	2.02436e+06	4302111	0	FALSE
+62.100IEDVTPIPSDSTR	tr|A0A2R8Y811|A0A2R8Y811_HUMAN;sp|P62263|RS14_HUMAN	32256730	15517946	3501856	20481530	2844290	9766231	0	FALSE
+62.100VLDNYLTSPLPEEVDETSAEDEGVSQR	sp|O00299|CLIC1_HUMAN	836162	779868	0	514583	203097	167881	0	FALSE
+62.100QQAAYYAQTSPQGMPQHPPAPQGQ	sp|Q96AE4|FUBP1_HUMAN	28517626	17329976	3.4991e+06	18167684	2.89286e+06	5934723	0	FALSE
+62.100GQNQPVLNITNK+62.100	tr|Q5R211|Q5R211_HUMAN;sp|P31327|CPSM_HUMAN;sp|P31327-3|CPSM_HUMAN	18414606	7868962	451620	12741141	2.86715e+06	3.64879e+06	0	FALSE
+62.100GAVEALAAALAHISGATSVDQR	sp|Q9NR30|DDX21_HUMAN;sp|Q9NR30-2|DDX21_HUMAN	1.21814e+06	653340	159146	709550	40403.1	733506	0	FALSE
+62.100LNQDQLDAVSK+62.100	tr|G3V153|G3V153_HUMAN;tr|E9PLA9|E9PLA9_HUMAN;sp|Q14444|CAPR1_HUMAN;sp|Q14444-2|CAPR1_HUMAN	9301382	4.17149e+06	1.24547e+06	4752565	2.00079e+06	3.37996e+06	0	FALSE
+62.100IYPLPDDPSVPAPPR	tr|H0YD14|H0YD14_HUMAN;sp|Q9NZM1|MYOF_HUMAN;sp|Q9NZM1-2|MYOF_HUMAN;sp|Q9NZM1-3|MYOF_HUMAN;sp|Q9NZM1-6|MYOF_HUMAN	10996057	4.14351e+06	1.07972e+06	4939246	50638.4	2714304	0	FALSE
+62.100IIPLYSTLPPQQQQR	sp|O43143|DHX15_HUMAN	682212	952937	0	1.0058e+06	266120	311259	0.00642458	FALSE
+62.100SGAQASSTPLSPTR	tr|Q3BDU5|Q3BDU5_HUMAN;sp|P02545|LMNA_HUMAN;sp|P02545-2|LMNA_HUMAN;sp|P02545-3|LMNA_HUMAN;sp|P02545-6|LMNA_HUMAN	2.94076e+06	969370	137974	1.32681e+06	104858	645206	0.00510783	FALSE
+62.100LVSSDPEINTK+62.100	sp|Q9Y266|NUDC_HUMAN	16551590	7074770	1.86321e+06	7253610	910258	2.83228e+06	0	FALSE
+62.100IEPIPGESPK+62.100	tr|A0A087WUT6|A0A087WUT6_HUMAN;sp|O60841|IF2P_HUMAN	1.92506e+06	1.03483e+06	83619.6	976455	645380	410928	0	FALSE
+62.100LTSFIGAIAIGDLVK+62.100	tr|F5GWF6|F5GWF6_HUMAN;tr|F8VQ14|F8VQ14_HUMAN;sp|P78371|TCPB_HUMAN	132584	132987	123999	122774	65770.9	41387.1	0.00145402	FALSE
+62.100VVVPPLPGK+62.100	sp|O60493|SNX3_HUMAN;sp|O60493-2|SNX3_HUMAN;sp|O60493-4|SNX3_HUMAN	7965789	5759785	0	6.27655e+06	2.64359e+06	6.63002e+06	0.00668896	FALSE
+62.100FSNSIPQSQTGNSETATPTNVDLPQVIPK+62.100	sp|P46087|NOP2_HUMAN;sp|P46087-2|NOP2_HUMAN;sp|P46087-4|NOP2_HUMAN	4332455	2588407	1.23349e+06	2.27181e+06	490220	2.34491e+06	0	FALSE
+62.100EYTAAVEAK+62.100	tr|J3KPX7|J3KPX7_HUMAN;tr|F5H3X6|F5H3X6_HUMAN;tr|U3KPZ5|U3KPZ5_HUMAN;tr|F5GWA7|F5GWA7_HUMAN;tr|F5GY37|F5GY37_HUMAN;sp|Q99623|PHB2_HUMAN;sp|Q99623-2|PHB2_HUMAN	4.09049e+06	1.56898e+06	91255.2	1.97057e+06	320757	874856	0	FALSE
+62.100FSAPVVPSSFNFGGPAPGM+15.995N	sp|O95373|IPO7_HUMAN	3.51007e+06	1.58123e+06	1206558	2571415	660190	1486221	0.00237389	FALSE
+62.100TGAIVDVPVGEELLGR	tr|K7EQH4|K7EQH4_HUMAN;tr|K7EK77|K7EK77_HUMAN;tr|K7ERX7|K7ERX7_HUMAN;tr|K7EJP1|K7EJP1_HUMAN;sp|P25705|ATPA_HUMAN;sp|P25705-2|ATPA_HUMAN	481070	323138	148401	328673	12110.3	331748	0	FALSE
+62.100NQTPAPSAAQTSAPSK+62.100	sp|Q9P265|DIP2B_HUMAN	3.57017e+06	1.63797e+06	149715	1.8731e+06	333617	1.20072e+06	0	FALSE
+62.100AVAVVVDPIQSVK+62.100	sp|O00487|PSDE_HUMAN	5520434	2942822	937897	2.95873e+06	568180	743675	0	FALSE
+62.100LVSESSDVLPK+62.100	sp|P05787|K2C8_HUMAN;sp|P05787-2|K2C8_HUMAN	26435116	10919692	1.01467e+06	13597718	1.95239e+06	12204487	0.000399521	FALSE
+62.100VQQLVPK+62.100	tr|H7C144|H7C144_HUMAN;tr|F5GXS2|F5GXS2_HUMAN;sp|O43707|ACTN4_HUMAN;sp|O43707-2|ACTN4_HUMAN;sp|O43707-3|ACTN4_HUMAN	12386968	5.1924e+06	364879	6.40629e+06	427262	2737070	0.000789266	FALSE
+62.100STAGDTHLGGEDFDNR	tr|E9PKE3|E9PKE3_HUMAN;tr|E9PN89|E9PN89_HUMAN;sp|P54652|HSP72_HUMAN;sp|P11142|HSP7C_HUMAN;sp|P11142-2|HSP7C_HUMAN	249487	218604	218114	115371	241785	149760	0.00237389	FALSE
+62.100NAGVEGSLIVEK+62.100	sp|P10809|CH60_HUMAN	7423437	26552084	1.52845e+06	5.61506e+06	5388900	4.85307e+06	0	FALSE
+62.100GQSPAGDGSPEPPTPR	tr|A0A0A0MRW6|A0A0A0MRW6_HUMAN;sp|Q9H6R4|NOL6_HUMAN;sp|Q9H6R4-2|NOL6_HUMAN;sp|Q9H6R4-3|NOL6_HUMAN;sp|Q9H6R4-4|NOL6_HUMAN	3038526	1.42841e+06	4313.29	1.3985e+06	230511	764808	0.000399521	FALSE
+62.100LITEDVQGK+62.100	tr|D6RAT0|D6RAT0_HUMAN;tr|D6RG13|D6RG13_HUMAN;tr|H0Y8L7|H0Y8L7_HUMAN;tr|D6RB09|D6RB09_HUMAN;tr|D6RED7|D6RED7_HUMAN;tr|D6RAS7|D6RAS7_HUMAN;tr|D6RGE0|D6RGE0_HUMAN;tr|E9PFI5|E9PFI5_HUMAN;sp|P61247|RS3A_HUMAN	11474676	4.99368e+06	254636	5.9615e+06	856092	3.19523e+06	0	FALSE
+62.100VSADAAPDC+57.021PETSNQTPPGPGAAAGPGID	sp|Q9NXH9|TRM1_HUMAN;sp|Q9NXH9-2|TRM1_HUMAN	44658532	22224990	6503884	21546892	5418656	8585692	0	FALSE
+62.100TPAQYDASELK+62.100	tr|H0YKZ7|H0YKZ7_HUMAN;tr|H0YKS4|H0YKS4_HUMAN;tr|H0YMD0|H0YMD0_HUMAN;tr|H0YLV6|H0YLV6_HUMAN;tr|H0YKX9|H0YKX9_HUMAN;tr|H0YMW4|H0YMW4_HUMAN;tr|H0YN42|H0YN42_HUMAN;tr|H0YMU9|H0YMU9_HUMAN;tr|H0YM50|H0YM50_HUMAN;tr|H0YMT9|H0YMT9_HUMAN;tr|H0YMM1|H0YMM1_HUMAN;tr|H0YNP5|H0YNP5_HUMAN;sp|P07355|ANXA2_HUMAN;sp|P07355-2|ANXA2_HUMAN;sp|A6NMY6|AXA2L_HUMAN	54736236	27619378	2.76536e+06	29929318	5261670	20336916	0.00237389	FALSE
+62.100IIYGGSVTGATC+57.021K+62.100	sp|P60174|TPIS_HUMAN;sp|P60174-1|TPIS_HUMAN;sp|P60174-4|TPIS_HUMAN	5203265	3137642	2.63417e+06	2.6381e+06	1.31829e+06	1.77135e+06	0.000789266	FALSE
+62.100LASAAYPDPSK+62.100	tr|A0A0C4DGZ5|A0A0C4DGZ5_HUMAN;sp|P54577|SYYC_HUMAN	5410092	4.11613e+06	5.29821e+06	4777906	1.67125e+06	3.75536e+06	0.00145402	FALSE
+62.100SVSLTGAPESVQK+62.100	tr|M0QXW7|M0QXW7_HUMAN;tr|M0R0I5|M0R0I5_HUMAN;tr|A0A087WTP3|A0A087WTP3_HUMAN;tr|M0QYH3|M0QYH3_HUMAN;sp|Q92945|FUBP2_HUMAN	11350218	5578839	1.64724e+06	5.41841e+06	1.24857e+06	2.59245e+06	0	FALSE
+62.100TNQELQEINR	tr|H0YKS4|H0YKS4_HUMAN;tr|H0YMD0|H0YMD0_HUMAN;tr|H0YL33|H0YL33_HUMAN;tr|H0YLE2|H0YLE2_HUMAN;tr|H0YN42|H0YN42_HUMAN;tr|H0YMU9|H0YMU9_HUMAN;tr|H0YM50|H0YM50_HUMAN;tr|H0YNA0|H0YNA0_HUMAN;tr|H0YN28|H0YN28_HUMAN;tr|H0YN52|H0YN52_HUMAN;tr|H0YMM1|H0YMM1_HUMAN;tr|H0YNP5|H0YNP5_HUMAN;sp|P07355|ANXA2_HUMAN;sp|P07355-2|ANXA2_HUMAN;sp|A6NMY6|AXA2L_HUMAN	8.21996e+06	4.05992e+06	763354	5178086	856512	1.98068e+06	0.000789266	FALSE
+62.100LPPNTNDEVDEDPTGNK+62.100	sp|Q15393|SF3B3_HUMAN;sp|Q15393-3|SF3B3_HUMAN	41157076	19224590	787511	21828054	3.16833e+06	11268471	0	FALSE
+62.100VGGTSDVEVNEK+62.100	sp|P10809|CH60_HUMAN	3676646	2.4997e+06	387075	1.86886e+06	316475	825329	0	FALSE
+62.100SC+57.021C+57.021SC+57.021C+57.021PVGC+57.021AK+62.100	sp|P80297|MT1X_HUMAN;sp|P02795|MT2_HUMAN;sp|P04732|MT1E_HUMAN;sp|Q8N339|MT1M_HUMAN;sp|P13640|MT1G_HUMAN;sp|P13640-2|MT1G_HUMAN	6165288	3.20219e+06	289495	4807085	696571	1.38895e+06	0	FALSE
+62.100GSRTEEEEYNFK+62.100	sp|Q9NS87-4|KIF15_HUMAN	1.68857e+06	99495464	26922226	25475920	6.92546e+06	949489	0.00988197	FALSE
+62.100TSVPAPLNSC+57.021LLK+62.100	tr|F2Z356|F2Z356_HUMAN;sp|Q9UKN8|TF3C4_HUMAN	3.58637e+06	2.32166e+06	2378068	2.88846e+06	2.1344e+06	4.65998e+06	0.00237389	FALSE
+62.100EVDEQMLNVQNK+62.100	tr|Q5ST81|Q5ST81_HUMAN;tr|Q5JP53|Q5JP53_HUMAN;sp|P07437|TBB5_HUMAN;sp|Q13885|TBB2A_HUMAN;sp|P68371|TBB4B_HUMAN;sp|Q9BVA1|TBB2B_HUMAN	26166038	2.73279e+06	1.16948e+06	3.06113e+06	0	1.09921e+06	0.00237389	FALSE
+62.100GQSPAGDGSPEPPTPR	tr|A0A0A0MRW6|A0A0A0MRW6_HUMAN;sp|Q9H6R4|NOL6_HUMAN;sp|Q9H6R4-2|NOL6_HUMAN;sp|Q9H6R4-3|NOL6_HUMAN;sp|Q9H6R4-4|NOL6_HUMAN	2.311e+06	1.09305e+06	383625	1.88595e+06	218993	1.18182e+06	0	FALSE
+62.100AAVPDAVGK+62.100	tr|H0Y7C1|H0Y7C1_HUMAN;tr|B1AKY9|B1AKY9_HUMAN;tr|M0R116|M0R116_HUMAN;tr|A0A0A0MT26|A0A0A0MT26_HUMAN;tr|A0A2R8YEY8|A0A2R8YEY8_HUMAN;sp|P13637|AT1A3_HUMAN;sp|P13637-2|AT1A3_HUMAN;sp|P13637-3|AT1A3_HUMAN;sp|P05023|AT1A1_HUMAN;sp|P05023-2|AT1A1_HUMAN;sp|P05023-3|AT1A1_HUMAN;sp|P05023-4|AT1A1_HUMAN;sp|P50993|AT1A2_HUMAN	5437191	3.12548e+06	113247	2.91286e+06	511718	2090116	0.00145402	FALSE
+62.100IM+15.995ATPEQVGK+62.100	tr|B1AHC9|B1AHC9_HUMAN;sp|P12956|XRCC6_HUMAN;sp|P12956-2|XRCC6_HUMAN	8747293	4.38271e+06	1.90464e+06	4.381e+06	1.26926e+06	3.15468e+06	0	FALSE
+62.100NTDQASMPDNTAAQK+62.100	sp|P35749|MYH11_HUMAN;sp|P35749-2|MYH11_HUMAN;sp|P35749-3|MYH11_HUMAN;sp|P35749-4|MYH11_HUMAN;sp|P35579|MYH9_HUMAN;sp|P35579-2|MYH9_HUMAN	6.76175e+06	3.65733e+06	747776	3.51245e+06	454420	4.11964e+06	0.00237389	FALSE
+62.100VC+57.021EEIAIIPSK+62.100	tr|A0A075B716|A0A075B716_HUMAN;tr|H3BNC9|H3BNC9_HUMAN;tr|H0YN88|H0YN88_HUMAN;tr|H0YN73|H0YN73_HUMAN;sp|P08708|RS17_HUMAN	16061008	7.51887e+06	1.13965e+06	8006217	5182347	3122182	0	FALSE
+62.100GTGIVSAPVPK+62.100	tr|E9PQD7|E9PQD7_HUMAN;tr|E9PM36|E9PM36_HUMAN;tr|I3L404|I3L404_HUMAN;tr|E9PMM9|E9PMM9_HUMAN;tr|H0YEN5|H0YEN5_HUMAN;sp|P15880|RS2_HUMAN	23840956	11788370	917397	12340548	2.49459e+06	5.93938e+06	0.00237389	FALSE
+62.100TVTNAVVTVPAYFNDSQR	tr|E9PQQ4|E9PQQ4_HUMAN;tr|E9PI65|E9PI65_HUMAN;tr|E9PLF4|E9PLF4_HUMAN;tr|E9PN89|E9PN89_HUMAN;tr|E9PK54|E9PK54_HUMAN;tr|E9PQK7|E9PQK7_HUMAN;sp|P11142|HSP7C_HUMAN;sp|P11142-2|HSP7C_HUMAN	48378316	63894572	11695456	46736976	11009050	17717558	0	FALSE
+62.100GYWAGLDASAQTTSHELTIPNDLIGC+57.021IIGR	tr|F8VZX2|F8VZX2_HUMAN;tr|F8VRH0|F8VRH0_HUMAN;sp|Q15366-2|PCBP2_HUMAN;sp|Q15366-3|PCBP2_HUMAN;sp|Q15366-4|PCBP2_HUMAN;sp|Q15366-5|PCBP2_HUMAN	38567.7	158626	52029.7	173162	0	224041	0.00145402	FALSE
+62.100TATESFASDPILYRPVAVALDTK+62.100GPEIR	tr|H3BQ34|H3BQ34_HUMAN;tr|H3BTJ2|H3BTJ2_HUMAN;tr|H3BT25|H3BT25_HUMAN;tr|H3BTN5|H3BTN5_HUMAN;tr|H3BUW1|H3BUW1_HUMAN;sp|P14618|KPYM_HUMAN;sp|P14618-2|KPYM_HUMAN;sp|P14618-3|KPYM_HUMAN	541998	798172	557821	786165	710920	720319	0.00237389	FALSE
+62.100QTVAVGVIK+62.100	tr|A0A087WVQ9|A0A087WVQ9_HUMAN;tr|A0A2U3TZH3|A0A2U3TZH3_HUMAN;sp|Q5VTE0|EF1A3_HUMAN;sp|Q05639|EF1A2_HUMAN;sp|P68104|EF1A1_HUMAN;sp|P68104-2|EF1A1_HUMAN	287174240	143448256	14881247	158183536	30738118	72210208	0	FALSE
+62.100AFLADPSAFVAAAPVAAATTAAPAAAAAPAK+62.100	tr|F8VWS0|F8VWS0_HUMAN;tr|F8W1K8|F8W1K8_HUMAN;sp|P05388|RLA0_HUMAN;sp|P05388-2|RLA0_HUMAN	138133	124261	168313	397124	206802	263234	0	FALSE
+62.100VC+57.021NPIITK+62.100	tr|A8K7Q2|A8K7Q2_HUMAN;tr|E9PKE3|E9PKE3_HUMAN;tr|E9PNE6|E9PNE6_HUMAN;tr|E9PS65|E9PS65_HUMAN;sp|P11142|HSP7C_HUMAN	36579644	10540937	11705837	15140976	3.4507e+06	8589356	0.00145402	FALSE
+62.100SPQPDPVDTPASTK+62.100	sp|P46013|KI67_HUMAN;sp|P46013-2|KI67_HUMAN	5.95025e+06	2443431	1.0475e+06	2.26877e+06	805065	1.62653e+06	0	FALSE
+62.100SSGASVTTQPTEFK+62.100	tr|F6VRR5|F6VRR5_HUMAN;sp|Q9BY77|PDIP3_HUMAN;sp|Q9BY77-2|PDIP3_HUMAN	13486034	10465981	775255	11790463	674007	6.34067e+06	0	FALSE
+62.100VLSSIEQK+62.100	sp|P31947|1433S_HUMAN;sp|P31947-2|1433S_HUMAN	5524427	3.41159e+06	1060611	3.3285e+06	1.19519e+06	1.57333e+06	0.00145402	FALSE
+62.100VISSIEQK+62.100	tr|Q4VY19|Q4VY19_HUMAN;tr|A0A0J9YWZ2|A0A0J9YWZ2_HUMAN;tr|A0A0J9YWE8|A0A0J9YWE8_HUMAN;tr|E9PG15|E9PG15_HUMAN;tr|A2IDB2|A2IDB2_HUMAN;tr|Q4VY20|Q4VY20_HUMAN;sp|Q04917|1433F_HUMAN;sp|P27348|1433T_HUMAN;sp|P61981|1433G_HUMAN;sp|P31946|1433B_HUMAN;sp|P31946-2|1433B_HUMAN	5524427	3.41159e+06	1060611	3.3285e+06	1.19519e+06	1.57333e+06	0.00145402	FALSE
+62.100YIDQEELNK+62.100	sp|P07900|HS90A_HUMAN;sp|P07900-2|HS90A_HUMAN;sp|Q14568|HS902_HUMAN;sp|P08238|HS90B_HUMAN;sp|Q58FF8|H90B2_HUMAN	13169799	7076165	2.08043e+06	8.18721e+06	1398520	3.64533e+06	0	FALSE
+62.100TTNLPTSVTATK+62.100	sp|Q5MIZ7|P4R3B_HUMAN;sp|Q5MIZ7-2|P4R3B_HUMAN;sp|Q5MIZ7-3|P4R3B_HUMAN;sp|Q5MIZ7-5|P4R3B_HUMAN	2.2352e+06	1.34811e+06	1.31547e+06	3.15099e+06	2.2903e+06	1.30028e+06	0.00237389	FALSE
+62.100VLTVINQTQK+62.100	tr|F2Z388|F2Z388_HUMAN;sp|P42766|RL35_HUMAN	3.32314e+06	626114	277758	1.22348e+06	547915	518811	0.00145402	FALSE
+62.100AVFVDLEPTVIDEVRTGTYR	tr|F8VRK0|F8VRK0_HUMAN;tr|F8VVB9|F8VVB9_HUMAN;tr|F8VRZ4|F8VRZ4_HUMAN;tr|F5H5D3|F5H5D3_HUMAN;tr|F8VWV9|F8VWV9_HUMAN;tr|F8VQQ4|F8VQQ4_HUMAN;tr|F8VX09|F8VX09_HUMAN;tr|A0A1W2PQM2|A0A1W2PQM2_HUMAN;tr|F8VS66|F8VS66_HUMAN;sp|P68363|TBA1B_HUMAN;sp|P68363-2|TBA1B_HUMAN;sp|Q71U36|TBA1A_HUMAN;sp|Q71U36-2|TBA1A_HUMAN;sp|Q9BQE3|TBA1C_HUMAN	1.67999e+06	788646	296070	905088	268367	1.8765e+06	0	FALSE
+62.100FSLPLEQK+62.100	XXX_tr|D6RIT3|D6RIT3_HUMAN;XXX_sp|Q8N1A6|CD033_HUMAN	295868	170179	5122525	2.39636e+06	3.44602e+06	679370	0.00723428	TRUE
+62.100IQEAGTEVVK+62.100	tr|G3XAL0|G3XAL0_HUMAN;sp|P40926|MDHM_HUMAN;sp|P40926-2|MDHM_HUMAN	72932832	35066872	5.59097e+06	37350532	7470748	22527610	0	FALSE
+62.100GAVDAAVPTNIIAAK+62.100	tr|E5RK31|E5RK31_HUMAN;tr|E5RJG1|E5RJG1_HUMAN;tr|E5RHH0|E5RHH0_HUMAN;tr|E5RG49|E5RG49_HUMAN;sp|Q9UI12|VATH_HUMAN;sp|Q9UI12-2|VATH_HUMAN	4884902	1.54619e+06	203441	1.75711e+06	581211	584595	0.00988197	FALSE
+62.100TVSLGAGAK+62.100DELHIVEAEAM+15.995NYEGSPIK+62.100VTLATLK+62.100	sp|P06748|NPM_HUMAN;sp|P06748-2|NPM_HUMAN;sp|P06748-3|NPM_HUMAN	1.43495e+06	1.24318e+06	836547	1.7482e+06	1.1723e+06	1.33204e+06	0	FALSE
+62.100VAEDEAEAAAAAK+62.100	tr|J3KPF3|J3KPF3_HUMAN;tr|H0YFS2|H0YFS2_HUMAN;tr|F5H0E2|F5H0E2_HUMAN;tr|F5GZS6|F5GZS6_HUMAN;tr|F5H867|F5H867_HUMAN;sp|P08195|4F2_HUMAN;sp|P08195-2|4F2_HUMAN;sp|P08195-3|4F2_HUMAN;sp|P08195-4|4F2_HUMAN	12613650	6016372	420976	6.19492e+06	1.0924e+06	2.34727e+06	0	FALSE
+62.100AM+15.995GIMNSFVNDIFER	tr|U3KQK0|U3KQK0_HUMAN;sp|Q99877|H2B1N_HUMAN;sp|P23527|H2B1O_HUMAN;sp|P57053|H2BFS_HUMAN;sp|P62807|H2B1C_HUMAN;sp|P58876|H2B1D_HUMAN;sp|Q5QNW6|H2B2F_HUMAN;sp|Q5QNW6-2|H2B2F_HUMAN;sp|P06899|H2B1J_HUMAN;sp|O60814|H2B1K_HUMAN;sp|Q16778|H2B2E_HUMAN;sp|Q93079|H2B1H_HUMAN;sp|Q8N257|H2B3B_HUMAN;sp|P33778|H2B1B_HUMAN;sp|Q99880|H2B1L_HUMAN;sp|Q99879|H2B1M_HUMAN	1.73425e+06	1.11798e+06	154708	676227	206854	478418	0	FALSE
+62.100DATNVGDEGGFAPNILENK+62.100EGLELLK+62.100	tr|A0A2R8Y6G6|A0A2R8Y6G6_HUMAN;sp|P06733|ENOA_HUMAN;sp|P06733-2|ENOA_HUMAN	1.25994e+06	818879	388858	1.339e+06	0	492759	0	FALSE
+62.100TGPTVTQVK+62.100	tr|E7ETY2|E7ETY2_HUMAN;tr|H0Y8Y7|H0Y8Y7_HUMAN;tr|A0A3B3IS06|A0A3B3IS06_HUMAN;tr|J3KQ96|J3KQ96_HUMAN;sp|Q13428|TCOF_HUMAN;sp|Q13428-2|TCOF_HUMAN;sp|Q13428-3|TCOF_HUMAN;sp|Q13428-4|TCOF_HUMAN;sp|Q13428-5|TCOF_HUMAN;sp|Q13428-6|TCOF_HUMAN;sp|Q13428-7|TCOF_HUMAN;sp|Q13428-8|TCOF_HUMAN	4.08538e+06	2287846	192602	2781041	760348	1.50989e+06	0.00145402	FALSE
+62.100VQAQAEQGQQELK+62.100	sp|Q9BW19|KIFC1_HUMAN	2.1386e+06	991985	278939	1.13565e+06	274790	401609	0	FALSE
+62.100VGLSGAPADAC+57.021STAQK+62.100	sp|Q8NFW8|NEUA_HUMAN	7968419	5.34352e+06	1592423	4.46702e+06	768868	1.11153e+06	0	FALSE
+62.100ASSTSLTSTQPTK+62.100	tr|E9PKD2|E9PKD2_HUMAN;tr|A0A0A0MSW3|A0A0A0MSW3_HUMAN;tr|H0Y837|H0Y837_HUMAN;tr|B7ZAV2|B7ZAV2_HUMAN;sp|P35658|NU214_HUMAN;sp|P35658-2|NU214_HUMAN;sp|P35658-3|NU214_HUMAN;sp|P35658-4|NU214_HUMAN;sp|P35658-5|NU214_HUMAN	1.42358e+06	556852	250900	769157	161051	309781	0.00237389	FALSE
+62.100IVQAEGEAEAAK+62.100	tr|J3KPX7|J3KPX7_HUMAN;tr|F5GY37|F5GY37_HUMAN;sp|Q99623|PHB2_HUMAN	30142666	15060959	1.28754e+06	15704295	2.779e+06	7.21129e+06	0	FALSE
+62.100NQLTSNPENTVFDAK+62.100	sp|P11021|BIP_HUMAN	8.07369e+06	4.86268e+06	751550	4309199	681990	957495	0	FALSE
+62.100EITALAPSTM+15.995K+62.100	tr|A0A2R8YFE2|A0A2R8YFE2_HUMAN;tr|A6NL76|A6NL76_HUMAN;sp|P63261|ACTG_HUMAN;sp|P68133|ACTS_HUMAN;sp|P60709|ACTB_HUMAN;sp|P68032|ACTC_HUMAN;sp|P63267|ACTH_HUMAN;sp|P63267-2|ACTH_HUMAN;sp|P62736|ACTA_HUMAN	48431344	22818866	4.071e+06	24857582	6.13296e+06	18318410	0.00237389	FALSE
+62.100LVVPATQC+57.021GSLIGK+62.100	sp|Q15365|PCBP1_HUMAN	5502899	3.34523e+06	1.38756e+06	2.12417e+06	1.56986e+06	1.13388e+06	0	FALSE
+62.100TPC+57.021EEILVK+62.100	tr|Q60FE5|Q60FE5_HUMAN;tr|A0A087WWY3|A0A087WWY3_HUMAN;sp|P21333|FLNA_HUMAN;sp|P21333-2|FLNA_HUMAN	6155772416	1009968192	907741696	100035896	1.28485e+06	4870174	0	FALSE
+62.100STSAPQM+15.995SPGSSDNQSSSPQPAQQK+62.100	tr|F8W726|F8W726_HUMAN;sp|Q14157|UBP2L_HUMAN;sp|Q14157-1|UBP2L_HUMAN;sp|Q14157-3|UBP2L_HUMAN;sp|Q14157-4|UBP2L_HUMAN;sp|Q14157-5|UBP2L_HUMAN	4.1574e+06	2.04554e+06	236463	2.03328e+06	310015	834149	0	FALSE
+62.100SQDVAVSPQQQQC+57.021SK+62.100	tr|H3BTD6|H3BTD6_HUMAN;tr|H3BPW9|H3BPW9_HUMAN;tr|H3BQ37|H3BQ37_HUMAN;sp|Q96F86|EDC3_HUMAN	1.03544e+06	940259	170503	888003	205464	749787	0.00237389	FALSE
+62.100EGSTQQLQTTSPK+62.100	tr|A0A087X0H9|A0A087X0H9_HUMAN;sp|Q5T8P6|RBM26_HUMAN;sp|Q5T8P6-2|RBM26_HUMAN;sp|Q5T8P6-3|RBM26_HUMAN;sp|Q5T8P6-4|RBM26_HUMAN;sp|Q5T8P6-5|RBM26_HUMAN	2.12777e+06	897660	93108.3	916590	280233	527438	0	FALSE
+62.100TIAATPIQTLPQSQSTPK+62.100	tr|A0A0C4DG88|A0A0C4DG88_HUMAN;sp|P14859|PO2F1_HUMAN;sp|P14859-2|PO2F1_HUMAN;sp|P14859-3|PO2F1_HUMAN;sp|P14859-6|PO2F1_HUMAN;sp|P14859-4|PO2F1_HUMAN;sp|P14859-5|PO2F1_HUMAN	9439845	4.07693e+06	590132	5.15928e+06	1.96058e+06	3.48094e+06	0.00237389	FALSE
+62.100APLATGEDDDDEVPDLVENFDEASK+62.100NEAN	sp|P20290|BTF3_HUMAN;sp|P20290-2|BTF3_HUMAN	690284	484880	0	584712	475054	263226	0	FALSE
+62.100TVGVEPAADGK+62.100	tr|H0YLP6|H0YLP6_HUMAN;tr|H0YKD8|H0YKD8_HUMAN;tr|H0YMF4|H0YMF4_HUMAN;sp|P46779|RL28_HUMAN;sp|P46779-2|RL28_HUMAN;sp|P46779-3|RL28_HUMAN;sp|P46779-4|RL28_HUMAN;sp|P46779-5|RL28_HUMAN	3.42755e+06	1.59385e+06	2.43064e+06	1.73668e+06	526719	769554	0.00145402	FALSE
+62.100GTTAVLTEK+62.100	sp|Q99436|PSB7_HUMAN	3262366	1747139	1.97876e+06	2458977	1.21639e+06	1.88563e+06	0.00237389	FALSE
+62.100IMATPEQVGK+62.100	tr|B1AHC9|B1AHC9_HUMAN;sp|P12956|XRCC6_HUMAN;sp|P12956-2|XRCC6_HUMAN	11099012	3.94006e+06	1.20449e+06	3.14962e+06	481420	1.42735e+06	0.00145402	FALSE
+62.100LASVPGSQTVVVK+62.100	sp|O00592|PODXL_HUMAN;sp|O00592-2|PODXL_HUMAN	25040356	9422583	1.71743e+06	11754006	1.6854e+06	6124524	0	FALSE
+62.100YSPTSPTYSPTSPK+62.100	sp|P24928|RPB1_HUMAN;sp|P24928|RPB1_HUMAN	932502	37141968	10211150	21065664	2.90358e+06	430277	0.00457928	FALSE
+62.100SC+57.021C+57.021SC+57.021C+57.021PVGC+57.021AK+62.100	sp|P80297|MT1X_HUMAN;sp|P02795|MT2_HUMAN;sp|P04732|MT1E_HUMAN;sp|Q8N339|MT1M_HUMAN;sp|P13640|MT1G_HUMAN;sp|P13640-2|MT1G_HUMAN	6171330	3.16678e+06	274063	5.04913e+06	710572	1.26194e+06	0	FALSE
+62.100AGGGPTLQC+57.021PPPSSPEK+62.100	sp|Q96N66|MBOA7_HUMAN;sp|Q96N66-2|MBOA7_HUMAN;sp|Q96N66-3|MBOA7_HUMAN	20769528	9968292	666396	11423298	2.09979e+06	6.06815e+06	0	FALSE
+62.100QLEPVYNSLAK+62.100	sp|P13667|PDIA4_HUMAN	2.77127e+06	2.71492e+06	1.99857e+06	2.69099e+06	3.28727e+06	2.5593e+06	0.00378017	FALSE
+62.100SSIVMGEPISQSSSNSQ	sp|Q8TCS8|PNPT1_HUMAN	29640970	15775661	2.2955e+06	16027511	2709836	5.93036e+06	0	FALSE
+62.100VAGQDGSVVQFK+62.100	tr|A8MU27|A8MU27_HUMAN;tr|A8MUA9|A8MUA9_HUMAN;sp|P61956|SUMO2_HUMAN;sp|P61956-2|SUMO2_HUMAN;sp|P55854|SUMO3_HUMAN;sp|P55854-2|SUMO3_HUMAN;sp|Q6EEV6|SUMO4_HUMAN	8666743	7.14209e+06	4996359	8796709	5.70974e+06	5.98242e+06	0	FALSE
+62.100AGSSTPGDAPPAVAEVQGR	sp|Q7Z6Z7|HUWE1_HUMAN;sp|Q7Z6Z7-2|HUWE1_HUMAN;sp|Q7Z6Z7-3|HUWE1_HUMAN	5.10729e+06	1.6663e+06	1.4177e+06	1444347	2.5891e+06	2.29156e+06	0	FALSE
+62.100LRRGQC+57.021PQTRDTARAVPPGSR	sp|Q99972|MYOC_HUMAN	171088736	0	10655295	68557800	38726912	0	0.00616419	FALSE
+62.100K+62.100IPNPDFFEDLEPFR	sp|P27824|CALX_HUMAN;sp|P27824-2|CALX_HUMAN;sp|P27824-3|CALX_HUMAN	554996	395287	318492	639195	775420	364128	0	FALSE
+62.100LATNTSAPDLK+62.100	tr|E7EVA0|E7EVA0_HUMAN;tr|F8W9U4|F8W9U4_HUMAN;tr|H7C4C5|H7C4C5_HUMAN;tr|B5MEG9|B5MEG9_HUMAN;tr|H0Y2V1|H0Y2V1_HUMAN;sp|P27816|MAP4_HUMAN;sp|P27816-2|MAP4_HUMAN;sp|P27816-4|MAP4_HUMAN;sp|P27816-5|MAP4_HUMAN;sp|P27816-6|MAP4_HUMAN	5774534	3.13231e+06	607176	3.76873e+06	1.29066e+06	1863345	0	FALSE
+62.100VANVSAAEDSVSQR	tr|G3V0G3|G3V0G3_HUMAN;tr|H7C3E9|H7C3E9_HUMAN;tr|F8WDT8|F8WDT8_HUMAN;sp|Q9NY93|DDX56_HUMAN;sp|Q9NY93-2|DDX56_HUMAN	1.50735e+06	867398	246897	843348	1.15893e+06	392620	0	FALSE
+62.100LLLPGELAK+62.100	tr|U3KQK0|U3KQK0_HUMAN;tr|A0A2R8Y619|A0A2R8Y619_HUMAN;sp|Q99877|H2B1N_HUMAN;sp|P23527|H2B1O_HUMAN;sp|P57053|H2BFS_HUMAN;sp|P62807|H2B1C_HUMAN;sp|P58876|H2B1D_HUMAN;sp|Q5QNW6|H2B2F_HUMAN;sp|Q5QNW6-2|H2B2F_HUMAN;sp|P06899|H2B1J_HUMAN;sp|O60814|H2B1K_HUMAN;sp|Q96A08|H2B1A_HUMAN;sp|Q16778|H2B2E_HUMAN;sp|Q93079|H2B1H_HUMAN;sp|Q8N257|H2B3B_HUMAN;sp|P33778|H2B1B_HUMAN;sp|Q99880|H2B1L_HUMAN;sp|Q99879|H2B…	33331386	16937912	1.53746e+06	17294138	3.24962e+06	10070918	0.000789266	FALSE
+62.100ASTEGVAIQGQQGTR	sp|Q92621|NU205_HUMAN	3.12491e+06	1.34434e+06	607387	1.88425e+06	290714	943605	0	FALSE
+62.100TLPPATSTEPSVILSK+62.100	tr|H0YBJ8|H0YBJ8_HUMAN;tr|E5RJU9|E5RJU9_HUMAN;sp|Q86UE4|LYRIC_HUMAN	543175	3.01055e+06	14815478	18129566	0	9479200	0	FALSE
+62.100AASAATAAPTATPAAQESGTIPK+62.100	tr|B8ZZ81|B8ZZ81_HUMAN;sp|O00116|ADAS_HUMAN	49572736	34756004	5782629	23892430	5806205	10373896	0	FALSE
+62.100MAPYQGPDAVPGALDYK+62.100	tr|H7C144|H7C144_HUMAN;tr|F5GXS2|F5GXS2_HUMAN;sp|O43707|ACTN4_HUMAN;sp|O43707-2|ACTN4_HUMAN;sp|O43707-3|ACTN4_HUMAN	7820888	4.78702e+06	4.47849e+06	6.55328e+06	4321663	5.82396e+06	0.00145402	FALSE
+62.100LNQPPEDGISSVK+62.100	tr|J3QSX4|J3QSX4_HUMAN;tr|J3QT28|J3QT28_HUMAN;sp|O43684|BUB3_HUMAN;sp|O43684-2|BUB3_HUMAN	21163802	1.88431e+06	721369	3.24554e+06	2.2736e+06	4.10334e+06	0	FALSE
+62.100AGFAGDDAPR	tr|G5E9R0|G5E9R0_HUMAN;tr|I3L4N8|I3L4N8_HUMAN;tr|C9JZR7|C9JZR7_HUMAN;tr|A0A2R8YGF8|A0A2R8YGF8_HUMAN;tr|C9JUM1|C9JUM1_HUMAN;tr|F8WCH0|F8WCH0_HUMAN;tr|K7EM38|K7EM38_HUMAN;tr|F8WB63|F8WB63_HUMAN;tr|I3L3R2|I3L3R2_HUMAN;tr|I3L1U9|I3L1U9_HUMAN;tr|I3L3I0|I3L3I0_HUMAN;tr|C9JFL5|C9JFL5_HUMAN;tr|E7EVS6|E7EVS6_HUMAN;tr|J3KT65|J3KT65_HUMAN;tr|F6QUT6|F6QUT6_HUMAN;tr|B8ZZJ2|B8ZZJ2_HUMAN;tr|A6NL76|A6NL76_HUMAN;…	6.04633e+06	2.65878e+06	358002	2893503	987954	815825	0.000399521	FALSE
+62.100QQPDTELEIQQK+62.100	sp|Q9NSE4|SYIM_HUMAN	10840072	4.53548e+06	425061	4285860	949923	4.63382e+06	0.00145402	FALSE
+62.100VGSTSENITQK+62.100	tr|A0A2R8Y5G6|A0A2R8Y5G6_HUMAN;tr|A0A0D9SG12|A0A0D9SG12_HUMAN;tr|A0A2R8YFR4|A0A2R8YFR4_HUMAN;tr|F6S8Q4|F6S8Q4_HUMAN;tr|A0A2R8YDH3|A0A2R8YDH3_HUMAN;tr|A0A2R8YF78|A0A2R8YF78_HUMAN;tr|A0A0D9SFB3|A0A0D9SFB3_HUMAN;tr|A0A2R8YCW1|A0A2R8YCW1_HUMAN;tr|A0A0D9SF53|A0A0D9SF53_HUMAN;tr|A0A2R8Y7T2|A0A2R8Y7T2_HUMAN;tr|A0A2R8YDT5|A0A2R8YDT5_HUMAN;tr|A0A2U3TZJ9|A0A2U3TZJ9_HUMAN;tr|A0A2R8Y4A4|A0A2R8Y4A4_HUMAN;tr|A…	2.95483e+06	1.17835e+06	153384	1.20249e+06	258833	788506	0.00237389	FALSE
+62.100VDNSSLTGESEPQTR	tr|B1AKY9|B1AKY9_HUMAN;tr|M0R116|M0R116_HUMAN;tr|A0A0A0MT26|A0A0A0MT26_HUMAN;tr|A0A2R8YEY8|A0A2R8YEY8_HUMAN;tr|M0QXF2|M0QXF2_HUMAN;sp|P13637|AT1A3_HUMAN;sp|P13637-2|AT1A3_HUMAN;sp|P13637-3|AT1A3_HUMAN;sp|P05023|AT1A1_HUMAN;sp|P05023-2|AT1A1_HUMAN;sp|P05023-3|AT1A1_HUMAN;sp|P05023-4|AT1A1_HUMAN;sp|P50993|AT1A2_HUMAN;sp|P20648|ATP4A_HUMAN	1.75284e+06	748909	17107	487804	90491.8	115883	0.00145402	FALSE
+62.100TQPM+15.995TAQAASYR	sp|Q96PK6|RBM14_HUMAN	4.4266e+06	1.98678e+06	262611	2.29865e+06	463101	1.40095e+06	0.00237389	FALSE
+62.100AQAAAPASVPAQAPK+62.100	tr|A0A3B3ITT5|A0A3B3ITT5_HUMAN;sp|P47914|RL29_HUMAN	2.16324e+06	948877	112860	1.00092e+06	176649	274298	0.00962861	FALSE
+66.125ALAAAGYDVEK+66.125	sp|P16403|H12_HUMAN;sp|P10412|H14_HUMAN;sp|P22492|H1T_HUMAN;sp|Q02539|H11_HUMAN;sp|P16402|H13_HUMAN	3.17196e+06	1.74637e+06	3.47484e+06	1.12482e+06	876671	1.19028e+06	0.000399521	FALSE
+64.113VTEAPC+57.021YPGAPSTEASGQTGPQEPTSARA	sp|P40222|TXLNA_HUMAN	26294934	12593741	5.86392e+06	11410293	2.99107e+06	6.69272e+06	0	FALSE
+66.125LVQDVANNTNEEAGDGTTTATVLAR	tr|E7EXB4|E7EXB4_HUMAN;tr|C9JL25|C9JL25_HUMAN;tr|E7ESH4|E7ESH4_HUMAN;sp|P10809|CH60_HUMAN;sp|P10809-2|CH60_HUMAN	61570804	32105922	5.78143e+06	32947310	7570946	17306572	0	FALSE
+64.113VTEAPC+57.021YPGAPSTEASGQTGPQEPTSARA	sp|P40222|TXLNA_HUMAN	26674668	12756667	3.77912e+06	14225432	5.11619e+06	15229605	0	FALSE
+64.113LASPSGSTSSGLEVVAPEGTSAPGGGPGTLDDSATIC+57.021R	tr|M0R0K9|M0R0K9_HUMAN;sp|Q13263|TIF1B_HUMAN;sp|Q13263-2|TIF1B_HUMAN	2.80133e+06	3.28117e+06	17652.2	2760640	0	5.07533e+06	0	FALSE
+64.113ESTGAQVQVAGDMLPNSTER	tr|E9PFP8|E9PFP8_HUMAN;tr|F8VZX2|F8VZX2_HUMAN;tr|F8VXH9|F8VXH9_HUMAN;tr|F8W0G4|F8W0G4_HUMAN;tr|J3QT27|J3QT27_HUMAN;tr|H3BRU6|H3BRU6_HUMAN;sp|Q15366|PCBP2_HUMAN;sp|Q15366-2|PCBP2_HUMAN;sp|Q15366-3|PCBP2_HUMAN;sp|Q15366-4|PCBP2_HUMAN;sp|Q15366-5|PCBP2_HUMAN;sp|Q15366-6|PCBP2_HUMAN;sp|Q15366-7|PCBP2_HUMAN;sp|Q15366-8|PCBP2_HUMAN;sp|Q15365|PCBP1_HUMAN;sp|P57721|PCBP3_HUMAN;sp|P57721-2|PCBP3_HUMAN;sp|…	75581448	36375776	3.20173e+06	37988296	6873884	16590148	0	FALSE
+64.113VM+15.995TIPYQPM+15.995PASSPVIC+57.021AGGQDR	sp|Q15365|PCBP1_HUMAN	4.15064e+06	7816511	3.57489e+06	6.47031e+06	10900400	8515219	0	FALSE
+62.100AQEPESGLSEETQVK+62.100	sp|P78527|PRKDC_HUMAN;sp|P78527-2|PRKDC_HUMAN	14482321	6.38947e+06	1.02601e+06	6.64707e+06	874425	1.82358e+06	0	FALSE
+62.100AAVDAGFVPNDM+15.995QVGQTGK+62.100	tr|H0YL12|H0YL12_HUMAN;tr|H0YK49|H0YK49_HUMAN;tr|H0YNX6|H0YNX6_HUMAN;tr|H0YLU7|H0YLU7_HUMAN;sp|P13804|ETFA_HUMAN;sp|P13804-2|ETFA_HUMAN	8768897	8.23923e+06	11802614	15388070	16462157	13228582	0.00237389	FALSE
+64.113GHYTEGAELVDSVLDVVR	tr|Q5ST81|Q5ST81_HUMAN;tr|Q5JP53|Q5JP53_HUMAN;tr|G3V2A3|G3V2A3_HUMAN;tr|A0A0B4J269|A0A0B4J269_HUMAN;sp|P07437|TBB5_HUMAN;sp|Q13885|TBB2A_HUMAN;sp|Q13509|TBB3_HUMAN;sp|Q13509-2|TBB3_HUMAN;sp|P68371|TBB4B_HUMAN;sp|Q9BVA1|TBB2B_HUMAN	283596	100622	167938	117468	257988	127951	0	FALSE
+64.113QQAAYYAQTSPQGMPQHPPAPQGQ	sp|Q96AE4|FUBP1_HUMAN	27932326	16382391	2.841e+06	17822366	2603179	6.29261e+06	0	FALSE
+62.100YISPDQLADLYK+62.100	tr|A0A2R8Y6G6|A0A2R8Y6G6_HUMAN;sp|P06733|ENOA_HUMAN;sp|P06733-2|ENOA_HUMAN	6.10225e+06	2.9881e+06	1.41677e+06	5745437	2.2083e+06	1.93506e+06	0	FALSE
+66.125AAPQSPSVPK+66.125	tr|E9PF10|E9PF10_HUMAN;sp|O75694|NU155_HUMAN;sp|O75694-2|NU155_HUMAN	10977637	5553201	413043	5637779	1.23965e+06	3.45998e+06	0	FALSE
+62.100QAGPAPAAATAASK+62.100	sp|Q9BTC0|DIDO1_HUMAN;sp|Q9BTC0-1|DIDO1_HUMAN	2.74169e+06	1.37074e+06	33988.1	1.43718e+06	244189	694760	0.00237389	FALSE
+64.113DNLTLWTSDTQGDEAEAGEGGEN	tr|H0YB80|H0YB80_HUMAN;tr|B0AZS6|B0AZS6_HUMAN;tr|B7Z2E6|B7Z2E6_HUMAN;sp|P63104|1433Z_HUMAN;sp|P63104-2|1433Z_HUMAN	18319422	9476007	536296	9035860	1374967	3.97774e+06	0	FALSE
+66.125ETTDTDTADQVIASFK+66.125	tr|H7C144|H7C144_HUMAN;tr|F5GXS2|F5GXS2_HUMAN;sp|O43707|ACTN4_HUMAN;sp|O43707-2|ACTN4_HUMAN;sp|O43707-3|ACTN4_HUMAN	8.37546e+06	3529799	2.22343e+06	5.26171e+06	2.10784e+06	3654177	0.00145402	FALSE
+66.125IEDLSQQAQLAAAEK+66.125	tr|F8VNW4|F8VNW4_HUMAN;tr|F8W1N5|F8W1N5_HUMAN;tr|F8W0W4|F8W0W4_HUMAN;tr|H0YHX9|H0YHX9_HUMAN;tr|F8VZJ2|F8VZJ2_HUMAN;sp|E9PAV3|NACAM_HUMAN;sp|E9PAV3-2|NACAM_HUMAN;sp|Q13765|NACA_HUMAN	43710920	19999996	1.36074e+06	21581094	4666750	11938250	0	FALSE
+66.125DSQTQAILTK+66.125	tr|C9JFE4|C9JFE4_HUMAN;tr|A8K070|A8K070_HUMAN;tr|A0A096LP07|A0A096LP07_HUMAN;tr|A0A096LPJ3|A0A096LPJ3_HUMAN;sp|Q13098|CSN1_HUMAN;sp|Q13098-5|CSN1_HUMAN;sp|Q13098-6|CSN1_HUMAN;sp|Q13098-7|CSN1_HUMAN	1.01723e+06	359521	14018272	7.16013e+06	758017	6.56251e+06	0	FALSE
+66.125VSSPLPSPSAM+15.995TDAANSQAAAK+66.125	tr|A0A0U1RRM1|A0A0U1RRM1_HUMAN;tr|A0A0U1RR30|A0A0U1RR30_HUMAN;sp|Q8WXI9|P66B_HUMAN	6.35003e+06	1855548	0	1.96922e+06	858263	1175954	0	FALSE
+66.125AIADTGANVVVTGGK+66.125	tr|H7C4C8|H7C4C8_HUMAN;sp|P50990|TCPQ_HUMAN;sp|P50990-2|TCPQ_HUMAN;sp|P50990-3|TCPQ_HUMAN	26034762	14151358	2.32019e+06	14518706	3331082	6549137	0	FALSE
+66.125ESTGAQVQVAGDMLPNSTER	tr|E9PFP8|E9PFP8_HUMAN;tr|F8VZX2|F8VZX2_HUMAN;tr|F8VXH9|F8VXH9_HUMAN;tr|F8W0G4|F8W0G4_HUMAN;tr|J3QT27|J3QT27_HUMAN;tr|H3BRU6|H3BRU6_HUMAN;sp|Q15366|PCBP2_HUMAN;sp|Q15366-2|PCBP2_HUMAN;sp|Q15366-3|PCBP2_HUMAN;sp|Q15366-4|PCBP2_HUMAN;sp|Q15366-5|PCBP2_HUMAN;sp|Q15366-6|PCBP2_HUMAN;sp|Q15366-7|PCBP2_HUMAN;sp|Q15366-8|PCBP2_HUMAN;sp|Q15365|PCBP1_HUMAN;sp|P57721|PCBP3_HUMAN;sp|P57721-2|PCBP3_HUMAN;sp|…	42174048	22592582	2.95177e+06	26083600	4286993	9160859	0	FALSE
+66.125TNATSPGVNSSTSPQSTDK+66.125SC+57.021TV	tr|B7ZM87|B7ZM87_HUMAN;sp|O75044|SRGP2_HUMAN	5.38788e+06	2539642	664731	2.5659e+06	889071	1.88546e+06	0	FALSE
+66.125TSSLAPVVGTTTTTPSPSAIK+66.125	sp|Q92733|PRCC_HUMAN	18547582	12384082	706426	10348466	2.20213e+06	5.68456e+06	0	FALSE
+66.125LNQPPEDGISSVK+66.125	tr|J3QSX4|J3QSX4_HUMAN;tr|J3QT28|J3QT28_HUMAN;sp|O43684|BUB3_HUMAN;sp|O43684-2|BUB3_HUMAN	1.68804e+06	885423	612243	1.29185e+06	345376	1.00202e+06	0	FALSE
+66.125AASADSTTEGTPADGFTVLSTK+66.125	sp|O75367|H2AY_HUMAN;sp|O75367-2|H2AY_HUMAN;sp|O75367-3|H2AY_HUMAN	50249624	24051812	1759683	25818926	3.61164e+06	15222029	0	FALSE
+66.125SNPSAVAGNETPGASTK+66.125	tr|A0A1B0GTW1|A0A1B0GTW1_HUMAN;tr|A0A3B3IS03|A0A3B3IS03_HUMAN;tr|A0A3B3ITE1|A0A3B3ITE1_HUMAN;tr|A0A3B3ISZ5|A0A3B3ISZ5_HUMAN;tr|A0A3B3IRI3|A0A3B3IRI3_HUMAN;tr|A0A2R8YDH4|A0A2R8YDH4_HUMAN;sp|Q9UDY2|ZO2_HUMAN;sp|Q9UDY2-3|ZO2_HUMAN;sp|Q9UDY2-6|ZO2_HUMAN;sp|Q9UDY2-7|ZO2_HUMAN	5.80252e+06	2.87477e+06	771074	2.76197e+06	555807	1.80925e+06	0	FALSE
+66.125VELVPPTPAEIPR	tr|A0A3B3ITX4|A0A3B3ITX4_HUMAN;tr|E9PN17|E9PN17_HUMAN;sp|O75964|ATP5L_HUMAN	29069054	15276890	746100	14799958	2.78042e+06	8915770	0	FALSE
+66.125LLVVDPETDEQLQK+66.125	tr|J3QRP6|J3QRP6_HUMAN;sp|O14745|NHRF1_HUMAN	2913126	2.3338e+06	1.28071e+06	5425793	0	4526105	0.00237389	FALSE
+66.125EVDEQM+15.995LNVQNK+66.125	tr|Q5ST81|Q5ST81_HUMAN;tr|Q5JP53|Q5JP53_HUMAN;sp|P07437|TBB5_HUMAN;sp|Q13885|TBB2A_HUMAN;sp|P68371|TBB4B_HUMAN;sp|Q9BVA1|TBB2B_HUMAN	4654690	1.85977e+06	265907	1.96912e+06	672930	1293976	0	FALSE
+66.125TDDYLDQPC+57.021YETINR	tr|Q5SX87|Q5SX87_HUMAN;tr|Q5SX91|Q5SX91_HUMAN;sp|P50395|GDIB_HUMAN;sp|P50395-2|GDIB_HUMAN	1.24197e+06	916179	317300	1.00137e+06	417439	874110	0	FALSE
+66.125TQASSSFQDSSQPAGK+66.125	sp|P46087|NOP2_HUMAN;sp|P46087-2|NOP2_HUMAN;sp|P46087-4|NOP2_HUMAN	18700684	9460838	1.32462e+06	11106339	1.96777e+06	6149879	0	FALSE
+66.125TATVYPEPQNK+66.125	sp|P48163|MAOX_HUMAN;sp|P48163-2|MAOX_HUMAN	7893662	8650813	992668	4.49032e+06	874633	2.02992e+06	0.000399521	FALSE
+66.125TTEEQVQASTPC+57.021PR	sp|Q14137|BOP1_HUMAN	6.4917e+06	4.08742e+06	293908	3.56537e+06	888423	1.88181e+06	0	FALSE
+66.125APSVPAAEPEYPK+66.125	tr|G3V213|G3V213_HUMAN;tr|F8VY04|F8VY04_HUMAN;tr|F8VZG5|F8VZG5_HUMAN;tr|F8W1A4|F8W1A4_HUMAN;tr|F8VPP1|F8VPP1_HUMAN;sp|P54819|KAD2_HUMAN;sp|P54819-2|KAD2_HUMAN;sp|P54819-3|KAD2_HUMAN;sp|P54819-5|KAD2_HUMAN	126663656	60556496	5.23582e+06	64158696	12231039	29976780	0	FALSE
+66.125ETVPTLAPK+66.125	sp|Q8WW12|PCNP_HUMAN;sp|Q8WW12-2|PCNP_HUMAN	0	1.42269e+06	246701	3.27831e+06	852189	2039653	0	FALSE
+66.125ETVSEESNVLC+57.021LSK+66.125	sp|P13639|EF2_HUMAN	22293682	12744818	1.11292e+06	13045206	1905349	5.48171e+06	0	FALSE
+66.125QQSAQSQVSTTAENK+66.125	tr|A0A087WV29|A0A087WV29_HUMAN;sp|Q9H0A0|NAT10_HUMAN;sp|Q9H0A0-2|NAT10_HUMAN	3811217	1.85471e+06	163428	2.00485e+06	362301	1.04838e+06	0	FALSE
+66.125QLQAETEPIVK+66.125	tr|E5RIT4|E5RIT4_HUMAN;tr|H0YBR5|H0YBR5_HUMAN;sp|P60228|EIF3E_HUMAN	17718116	7234195	1.70003e+06	8847613	6.842e+06	16190173	0	FALSE
+66.125VC+57.021NPIITK+66.125	tr|A8K7Q2|A8K7Q2_HUMAN;tr|E9PKE3|E9PKE3_HUMAN;tr|E9PNE6|E9PNE6_HUMAN;tr|E9PS65|E9PS65_HUMAN;sp|P11142|HSP7C_HUMAN	37862748	10937828	11868039	15173459	3.42527e+06	8317462	0.00145402	FALSE
+66.125VGINYQPPTVVPGGDLAK+66.125	tr|C9J2C0|C9J2C0_HUMAN;tr|F5H5D3|F5H5D3_HUMAN;tr|A0A1W2PQM2|A0A1W2PQM2_HUMAN;tr|V9GZ17|V9GZ17_HUMAN;sp|P68363|TBA1B_HUMAN;sp|P68363-2|TBA1B_HUMAN;sp|Q9NY65|TBA8_HUMAN;sp|Q9NY65-2|TBA8_HUMAN;sp|P68366|TBA4A_HUMAN;sp|P68366-2|TBA4A_HUMAN;sp|P0DPH7|TBA3C_HUMAN;sp|P0DPH7-2|TBA3C_HUMAN;sp|P0DPH8|TBA3D_HUMAN;sp|Q6PEY2|TBA3E_HUMAN;sp|Q71U36|TBA1A_HUMAN;sp|Q71U36-2|TBA1A_HUMAN;sp|Q9BQE3|TBA1C_HUMAN	240328432	129258472	15135210	130804512	25737976	56985260	0	FALSE
+66.125AFLADPSAFVAAAPVAAATTAAPAAAAAPAK+66.125	tr|F8VWS0|F8VWS0_HUMAN;tr|F8W1K8|F8W1K8_HUMAN;sp|P05388|RLA0_HUMAN;sp|P05388-2|RLA0_HUMAN	215973	194841	118210	213336	52474.5	262631	0	FALSE
+66.125QQAAYYAQTSPQGMPQHPPAPQGQ	sp|Q96AE4|FUBP1_HUMAN	27278538	17286470	3.18393e+06	17557882	2.62888e+06	6.30647e+06	0	FALSE
+66.125TQPTYPSVK+66.125	sp|O15226|NKRF_HUMAN;sp|O15226-2|NKRF_HUMAN	23345376	10061106	839693	11712055	1.36005e+06	6618011	0	FALSE
+66.125SSSQIPAQPSVAK+66.125	tr|A0A0A0MS30|A0A0A0MS30_HUMAN;tr|E7EPN9|E7EPN9_HUMAN;sp|Q9Y520|PRC2C_HUMAN;sp|Q9Y520-2|PRC2C_HUMAN;sp|Q9Y520-3|PRC2C_HUMAN;sp|Q9Y520-4|PRC2C_HUMAN;sp|Q9Y520-5|PRC2C_HUMAN;sp|Q9Y520-6|PRC2C_HUMAN;sp|Q9Y520-7|PRC2C_HUMAN	21573626	10798675	1.22088e+06	11173717	932467	3.12539e+06	0	FALSE
+66.125TALPAQSAATLPAR	tr|A0A087WUZ3|A0A087WUZ3_HUMAN;sp|Q01082|SPTB2_HUMAN	22479360	10173398	1.35986e+06	11535270	2.43057e+06	4603160	0	FALSE
+66.125SADTLWDIQK+66.125DLK+66.125DL	sp|P07195|LDHB_HUMAN	2726539	1.68477e+06	891359	1.33127e+06	848381	866260	0	FALSE
+66.125ATNESEDEIPQLVPIGK+66.125	tr|J3QSV6|J3QSV6_HUMAN;sp|O76021|RL1D1_HUMAN;sp|O76021-2|RL1D1_HUMAN	13921506	6.67634e+06	1.39506e+06	6.33656e+06	1.78474e+06	3.45148e+06	0	FALSE
+66.125SAAPSTLDSSSTAPAQLGK+66.125	tr|H7C4H2|H7C4H2_HUMAN;sp|Q9Y5M8|SRPRB_HUMAN	25236304	11894993	1.39714e+06	12862151	3.06021e+06	6094652	0	FALSE
+66.125QGAIVAVTGDGVNDSPALK+66.125	tr|H0Y7C1|H0Y7C1_HUMAN;tr|B1AKY9|B1AKY9_HUMAN;tr|M0R116|M0R116_HUMAN;tr|A0A0A0MT26|A0A0A0MT26_HUMAN;tr|A0A2R8YEY8|A0A2R8YEY8_HUMAN;sp|P13637|AT1A3_HUMAN;sp|P13637-2|AT1A3_HUMAN;sp|P13637-3|AT1A3_HUMAN;sp|P05023|AT1A1_HUMAN;sp|P05023-3|AT1A1_HUMAN;sp|P05023-4|AT1A1_HUMAN;sp|P50993|AT1A2_HUMAN	19843456	7.8161e+06	779652	9422461	2124989	5.8813e+06	0	FALSE
+66.125AEEYEFLTPVEEAPK+66.125	tr|J3QQX2|J3QQX2_HUMAN;tr|J3KTF8|J3KTF8_HUMAN;tr|J3KRE2|J3KRE2_HUMAN;sp|P52565|GDIR1_HUMAN	34270512	16789086	1.18497e+06	16734566	2.99083e+06	8673164	0	FALSE
+66.125VIEEQLEPAVEK+66.125	sp|P42704|LPPRC_HUMAN	1073480	328872	1.14458e+06	2.50314e+06	928222	8101496	0.00237389	FALSE
+66.125TVTNAVVTVPAYFNDSQR	tr|E9PQQ4|E9PQQ4_HUMAN;tr|E9PI65|E9PI65_HUMAN;tr|E9PLF4|E9PLF4_HUMAN;tr|E9PN89|E9PN89_HUMAN;tr|E9PK54|E9PK54_HUMAN;tr|E9PQK7|E9PQK7_HUMAN;sp|P11142|HSP7C_HUMAN;sp|P11142-2|HSP7C_HUMAN	28713082	31359474	5.81236e+06	23303492	6135125	9445440	0	FALSE
+66.125AAPTAASDQPDSAATTEK+66.125	sp|Q9BRP8|PYM1_HUMAN;sp|Q9BRP8-2|PYM1_HUMAN	5314903	2549567	196370	2.63056e+06	380072	1.18816e+06	0	FALSE
+66.125LPPNTNDEVDEDPTGNK+66.125	sp|Q15393|SF3B3_HUMAN;sp|Q15393-3|SF3B3_HUMAN	40711804	18844054	1.09784e+06	20507138	3085861	11022364	0	FALSE
+66.125ETPPPLVPPAAR	sp|Q9BQA1|MEP50_HUMAN;sp|Q9BQA1-2|MEP50_HUMAN	36107360	15760317	4.08496e+06	17084742	7.1836e+06	10158862	0	FALSE
+66.125SETAPAETATPAPVEK+66.125	sp|P16401|H15_HUMAN	9231289	3581134	597747	2.38992e+06	353921	992447	0	FALSE
+66.125LASPSGSTSSGLEVVAPEGTSAPGGGPGTLDDSATIC+57.021R	tr|M0R0K9|M0R0K9_HUMAN;sp|Q13263|TIF1B_HUMAN;sp|Q13263-2|TIF1B_HUMAN	12079019	7733865	1.66609e+06	8421459	1.69337e+06	3.73469e+06	0	FALSE
+66.125SETAPAAPAAAPPAEK+66.125	sp|P16403|H12_HUMAN	45076392	14879246	2.14305e+06	21467816	3780973	13940943	0	FALSE
+66.125NNIPYFETSAK+66.125	tr|C9IZZ0|C9IZZ0_HUMAN;tr|C9J4V0|C9J4V0_HUMAN;tr|C9J8S3|C9J8S3_HUMAN;sp|P51149|RAB7A_HUMAN	14960244	8831479	1.21953e+06	9175174	1119454	5065275	0	FALSE
+66.125VAEDEAEAAAAAK+66.125	tr|J3KPF3|J3KPF3_HUMAN;tr|H0YFS2|H0YFS2_HUMAN;tr|F5H0E2|F5H0E2_HUMAN;tr|F5GZS6|F5GZS6_HUMAN;tr|F5H867|F5H867_HUMAN;sp|P08195|4F2_HUMAN;sp|P08195-2|4F2_HUMAN;sp|P08195-3|4F2_HUMAN;sp|P08195-4|4F2_HUMAN	33834504	15780835	1.52052e+06	16382207	2893866	6190821	0	FALSE
+66.125GGEIQPVSVK+66.125	tr|B8ZZL8|B8ZZL8_HUMAN;tr|B8ZZ54|B8ZZ54_HUMAN;sp|P61604|CH10_HUMAN	64706380	36351428	3707188	33836964	6.10249e+06	18727136	0	FALSE
+66.125SGAQASSTPLSPTR	tr|Q3BDU5|Q3BDU5_HUMAN;sp|P02545|LMNA_HUMAN;sp|P02545-2|LMNA_HUMAN;sp|P02545-3|LMNA_HUMAN;sp|P02545-6|LMNA_HUMAN	13490657	6633513	800868	7539574	1098160	4273945	0	FALSE
+66.125AQEAPGQAEPPAAAEVQGAGNENEPR	tr|J3QRP6|J3QRP6_HUMAN;sp|O14745|NHRF1_HUMAN	19669112	11253247	1.72624e+06	9570996	3.45259e+06	2602517	0	FALSE
+66.125TK+66.125VHAELADVLTEAVVDSILAIK+66.125K+66.125	sp|P40227|TCPZ_HUMAN;sp|P40227-2|TCPZ_HUMAN	16446483	11559643	1.61956e+06	9330574	1.74977e+06	5.61201e+06	0	FALSE
+66.125GTGIVSAPVPK+66.125	tr|E9PQD7|E9PQD7_HUMAN;tr|E9PM36|E9PM36_HUMAN;tr|I3L404|I3L404_HUMAN;tr|E9PMM9|E9PMM9_HUMAN;tr|H0YEN5|H0YEN5_HUMAN;sp|P15880|RS2_HUMAN	155163392	83251528	8767763	89816896	18240358	41921516	0	FALSE
+66.125VAVEYLDPSPEVQK+66.125	tr|J3QT28|J3QT28_HUMAN;sp|O43684|BUB3_HUMAN;sp|O43684-2|BUB3_HUMAN	9898303	5392651	2.37633e+06	5.39629e+06	1.76845e+06	2824287	0	FALSE
+66.125VC+57.021ENIPIVLC+57.021GNK+66.125	tr|B5MDF5|B5MDF5_HUMAN;tr|B4DV51|B4DV51_HUMAN;tr|F5H018|F5H018_HUMAN;tr|J3KQE5|J3KQE5_HUMAN;sp|P62826|RAN_HUMAN	1.10809e+06	872009	263418	1.30247e+06	601006	1.09396e+06	0.00378017	FALSE
+66.125IAPPETPDSK+66.125	sp|Q9NZI8|IF2B1_HUMAN;sp|Q9NZI8-2|IF2B1_HUMAN	9523919	3.62348e+06	1.33839e+06	4.2413e+06	809220	2957792	0	FALSE
+66.125AAVDAGFVPNDM+15.995QVGQTGK+66.125	tr|H0YL12|H0YL12_HUMAN;tr|H0YK49|H0YK49_HUMAN;tr|H0YNX6|H0YNX6_HUMAN;tr|H0YLU7|H0YLU7_HUMAN;sp|P13804|ETFA_HUMAN;sp|P13804-2|ETFA_HUMAN	8805966	4.36607e+06	11856594	3.95419e+06	3018958	2.46124e+06	0.00237389	FALSE
+66.125AQLEPVASPAK+66.125	tr|H0YDN1|H0YDN1_HUMAN;sp|Q15149|PLEC_HUMAN;sp|Q15149-2|PLEC_HUMAN;sp|Q15149-3|PLEC_HUMAN;sp|Q15149-4|PLEC_HUMAN;sp|Q15149-5|PLEC_HUMAN;sp|Q15149-6|PLEC_HUMAN;sp|Q15149-7|PLEC_HUMAN;sp|Q15149-8|PLEC_HUMAN;sp|Q15149-9|PLEC_HUMAN	20335918	9811789	5.2332e+06	12676700	4.78394e+06	9686040	0	FALSE
+66.125GPPSTPVPTQTQNPESR	tr|H7C1N2|H7C1N2_HUMAN;tr|J3KR05|J3KR05_HUMAN;sp|O75128|COBL_HUMAN;sp|O75128-2|COBL_HUMAN;sp|O75128-3|COBL_HUMAN;sp|O75128-6|COBL_HUMAN;sp|O75128-7|COBL_HUMAN	7.86242e+06	4553794	30068.4	4.58376e+06	766021	2.68651e+06	0	FALSE
+66.125TAEQVM+15.995ISSRSGSWVMSR	tr|V9GZ60|V9GZ60_HUMAN;sp|P31513|FMO3_HUMAN	22459050	9906690	329243	10824525	2959102	6.20833e+06	0.00723428	FALSE
+66.125QVHPDTGISSK+66.125	tr|U3KQK0|U3KQK0_HUMAN;sp|Q99877|H2B1N_HUMAN;sp|P23527|H2B1O_HUMAN;sp|P57053|H2BFS_HUMAN;sp|P62807|H2B1C_HUMAN;sp|P58876|H2B1D_HUMAN;sp|Q5QNW6|H2B2F_HUMAN;sp|Q5QNW6-2|H2B2F_HUMAN;sp|P06899|H2B1J_HUMAN;sp|O60814|H2B1K_HUMAN;sp|Q96A08|H2B1A_HUMAN;sp|Q16778|H2B2E_HUMAN;sp|Q93079|H2B1H_HUMAN;sp|Q8N257|H2B3B_HUMAN;sp|P33778|H2B1B_HUMAN;sp|Q99880|H2B1L_HUMAN;sp|Q99879|H2B1M_HUMAN	0	9194.02	18971.4	3144.36	19159.2	59657.3	0.00237389	FALSE
+66.125STPVNVPISQK+66.125	sp|Q8WUM4|PDC6I_HUMAN;sp|Q8WUM4-2|PDC6I_HUMAN	19122110	13522881	3791784	13467644	8984336	10252243	0	FALSE
+66.125VPEVPTAPATDAAPK+66.125	tr|K7ERG1|K7ERG1_HUMAN;tr|K7EJ51|K7EJ51_HUMAN;sp|Q9UHD8|SEPT9_HUMAN;sp|Q9UHD8-2|SEPT9_HUMAN;sp|Q9UHD8-3|SEPT9_HUMAN;sp|Q9UHD8-5|SEPT9_HUMAN;sp|Q9UHD8-7|SEPT9_HUMAN	18204736	8572373	980319	5.73779e+06	417921	2.07877e+06	0	FALSE
+66.125AYSDPSTGEPATYGELQQR	tr|H0YDN1|H0YDN1_HUMAN;sp|Q15149|PLEC_HUMAN;sp|Q15149-2|PLEC_HUMAN;sp|Q15149-3|PLEC_HUMAN;sp|Q15149-4|PLEC_HUMAN;sp|Q15149-5|PLEC_HUMAN;sp|Q15149-6|PLEC_HUMAN;sp|Q15149-7|PLEC_HUMAN;sp|Q15149-8|PLEC_HUMAN;sp|Q15149-9|PLEC_HUMAN	21836866	8749200	388011	6.05506e+06	819833	2.14073e+06	0	FALSE
+66.125ASGPPVSELITK+66.125	sp|P16403|H12_HUMAN;sp|P10412|H14_HUMAN;sp|P16402|H13_HUMAN	36529820	17735086	1.39158e+06	19873348	3480695	12500937	0	FALSE
+66.125SAQQEASADVATPK+66.125	sp|Q8WYP5|ELYS_HUMAN;sp|Q8WYP5-2|ELYS_HUMAN;sp|Q8WYP5-3|ELYS_HUMAN	2.19366e+06	945822	121146	800937	22470.9	235853	0	FALSE
+66.125DEILPTTPISEQK+66.125	tr|H0YEU2|H0YEU2_HUMAN;tr|E9PL09|E9PL09_HUMAN;tr|E9PSF4|E9PSF4_HUMAN;tr|E9PPU1|E9PPU1_HUMAN;sp|P23396|RS3_HUMAN;sp|P23396-2|RS3_HUMAN	25608938	11506513	1.08058e+06	12187484	1.46728e+06	7361041	0	FALSE
+66.125SADGSAPAGEGEGVTLQR	sp|Q01650|LAT1_HUMAN	10386281	5786165	1.35379e+06	6455520	2.32667e+06	3.74481e+06	0	FALSE
+66.125VSADAAPDC+57.021PETSNQTPPGPGAAAGPGID	sp|Q9NXH9|TRM1_HUMAN;sp|Q9NXH9-2|TRM1_HUMAN	43570456	23098148	5.82078e+06	21154968	4622087	8679753	0	FALSE
+66.125AAAAAAAAAPAAAATAPTTAATTAATAAQ	tr|H0YLW0|H0YLW0_HUMAN;sp|P37108|SRP14_HUMAN	87240080	47550676	6.28344e+06	45348356	8.09679e+06	20476336	0.00237389	FALSE
+66.125ETPAATEAPSSTPK+66.125	sp|P80723|BASP1_HUMAN;sp|P80723-2|BASP1_HUMAN	121289528	57263628	5980584	61831388	11443447	33859220	0	FALSE
+66.125SSDASTAQPPESQPLPASQTPASNQPK+66.125	sp|P48634|PRC2A_HUMAN;sp|P48634-2|PRC2A_HUMAN;sp|P48634-3|PRC2A_HUMAN;sp|P48634-4|PRC2A_HUMAN	15529747	8655081	2.51886e+06	5469952	961517	2.01707e+06	0	FALSE
+66.125SELPLDPLPVPTEEGNPLLK+66.125	tr|M0QXM4|M0QXM4_HUMAN;sp|Q15758|AAAT_HUMAN;sp|Q15758-2|AAAT_HUMAN;sp|Q15758-3|AAAT_HUMAN	307678	115995	0	62692.2	0	157950	0	FALSE
+66.125SSATVTGEPPSYSSGSDSSK+66.125	sp|P35658|NU214_HUMAN;sp|P35658-2|NU214_HUMAN;sp|P35658-3|NU214_HUMAN;sp|P35658-4|NU214_HUMAN;sp|P35658-5|NU214_HUMAN	0	19785872	22823200	1.48778e+06	3.74416e+06	8734746	0	FALSE
+66.125C+57.021TGGEVGATSALAPK+66.125	sp|P30050|RL12_HUMAN;sp|P30050-2|RL12_HUMAN	63173756	32190246	2.77916e+06	31124536	7080220	15111423	0	FALSE
+66.125IGQQPQQPGAPPQQDYTK+66.125	tr|M0QYG1|M0QYG1_HUMAN;tr|M0R0C6|M0R0C6_HUMAN;tr|A0A087WTP3|A0A087WTP3_HUMAN;sp|Q92945|FUBP2_HUMAN	24658982	13376057	419827	15397054	1.87519e+06	7.16229e+06	0	FALSE
+66.125MDSTEPPYSQK+66.125	tr|A0A087WV01|A0A087WV01_HUMAN;sp|Q5VTE0|EF1A3_HUMAN;sp|P68104|EF1A1_HUMAN	9542650	6.03713e+06	522906	19623438	6.63598e+06	3091659	0	FALSE
+66.125QQAAYYAQTSPQGM+15.995PQHPPAPQGQ	sp|Q96AE4|FUBP1_HUMAN	13534487	7.0315e+06	380101	9000944	909009	3.51064e+06	0	FALSE
+66.125SETAPAETATPAPVEK+66.125	sp|P16401|H15_HUMAN	19323622	8732181	835684	6.30937e+06	1.33246e+06	2.18517e+06	0	FALSE
+66.125GAAPPPPPVPR	sp|Q07666|KHDR1_HUMAN;sp|Q07666-2|KHDR1_HUMAN;sp|Q07666-3|KHDR1_HUMAN	21892230	9427865	689740	11555932	1.9617e+06	5203195	0	FALSE
+66.125K+66.125PLVIIAEDVDGEALSTLVLNR	sp|P10809|CH60_HUMAN	11531108	5609831	698733	5464871	922262	2.77111e+06	0	FALSE
+66.125LVSESSDVLPK+66.125	sp|P05787|K2C8_HUMAN;sp|P05787-2|K2C8_HUMAN	25940836	11009947	952452	13773680	1.83007e+06	12168623	0.000399521	FALSE
+66.125FEFYC+57.021DR	XXX_tr|H7C0N2|H7C0N2_HUMAN;XXX_sp|A6NJV1|CB070_HUMAN	893304	584854	4071873	0	57204060	26570322	0.00237389	TRUE
+66.125TVPVEAVTSK+66.125	sp|Q14247|SRC8_HUMAN;sp|Q14247-2|SRC8_HUMAN;sp|Q14247-3|SRC8_HUMAN	3269632	1.43219e+06	917123	2271976	345273	1.30632e+06	0	FALSE
+66.125AQGPAASAEEPK+66.125PVEAPAANSDQTVTVK+66.125E	sp|P80723|BASP1_HUMAN;sp|P80723-2|BASP1_HUMAN	1.95759e+06	1412933	0	3006038	0	3.05789e+06	0	FALSE
+66.125TTTAAAVASTGPSSR	tr|E7EVA0|E7EVA0_HUMAN;tr|F8W9U4|F8W9U4_HUMAN;tr|H7C4C5|H7C4C5_HUMAN;tr|B5MEG9|B5MEG9_HUMAN;tr|H0Y2V1|H0Y2V1_HUMAN;sp|P27816|MAP4_HUMAN;sp|P27816-2|MAP4_HUMAN;sp|P27816-4|MAP4_HUMAN;sp|P27816-5|MAP4_HUMAN;sp|P27816-6|MAP4_HUMAN	3.67171e+06	1.94205e+06	178280	3.15239e+06	401265	1.17455e+06	0.00237389	FALSE
+66.125DNLTLWTSDQQDDDGGEGNN	sp|P61981|1433G_HUMAN	23930808	13154562	1.77433e+06	10950541	4476648	4.72724e+06	0.00237389	FALSE
+66.125SPVESTTEPPAVR	tr|G5EA31|G5EA31_HUMAN;sp|P53992|SC24C_HUMAN;sp|P53992-2|SC24C_HUMAN	13358665	6154895	1.42098e+06	8375513	2.27315e+06	5155825	0.00237389	FALSE

## Sheet: Fr2
Peptide	MatchedProteins	Quantity_1	Quantity_2	Quantity_3	Quantity_4	Quantity_5	Quantity_6	QValue	Decoy
+56.063QLEVYTSGGDPESVAGEYGR	tr|B0QY90|B0QY90_HUMAN;tr|B0QY89|B0QY89_HUMAN;sp|Q9Y262|EIF3L_HUMAN;sp|Q9Y262-2|EIF3L_HUMAN	6.46096e+06	4.74671e+06	1.14511e+06	3.85223e+06	2.84938e+06	1.78745e+06	0	FALSE
+56.063LNSNTQVVLLSATM+15.995PSDVLEVTK+56.063	tr|J3KT12|J3KT12_HUMAN;tr|J3QS69|J3QS69_HUMAN;tr|J3KSZ0|J3KSZ0_HUMAN;tr|J3KTN0|J3KTN0_HUMAN;tr|J3KTB5|J3KTB5_HUMAN;sp|P60842|IF4A1_HUMAN;sp|P60842-2|IF4A1_HUMAN	7.94972e+06	4.14839e+06	333599	3440994	542595	1.22235e+06	0.000969982	FALSE
+56.063LLEDGEDFNLGDALDSSNSM+15.995QTIQK+56.063	sp|P05783|K1C18_HUMAN	15192265	7840769	1.97243e+06	6658534	1.04749e+06	3.72552e+06	0	FALSE
+56.063ASGPGLNTTGVPASLPVEFTIDAK+56.063	tr|Q60FE5|Q60FE5_HUMAN;tr|A0A087WWY3|A0A087WWY3_HUMAN;sp|P21333|FLNA_HUMAN;sp|P21333-2|FLNA_HUMAN	51912812	26691296	3.34638e+06	26586896	5.8201e+06	11577690	0	FALSE
+56.063QAFTDVATGSLGQGLGAAC+57.021GM+15.995AYTGK+56.063	tr|F8W888|F8W888_HUMAN;tr|E9PFF2|E9PFF2_HUMAN;sp|P29401|TKT_HUMAN;sp|P29401-2|TKT_HUMAN	30147452	15694278	4283605	18077438	2.53607e+06	4483807	0	FALSE
+56.063LVSSPC+57.021C+57.021IVTSTYGWTANMER	sp|P08238|HS90B_HUMAN	50156212	25524496	6.48864e+06	27983964	6.31791e+06	11287531	0	FALSE
+56.063TIQNSSVSPTSSSSSSSSTGETQTQSSSR	sp|Q7Z417|NUFP2_HUMAN	11888508	7197157	1.03168e+06	8044134	1.52838e+06	3.51193e+06	0	FALSE
+56.063LAQQYYLVYQEPIPTAQLVQR	tr|A0A024RA52|A0A024RA52_HUMAN;tr|C9JCK5|C9JCK5_HUMAN;sp|P25787|PSA2_HUMAN	18522490	9511375	2.00991e+06	8776127	2.24217e+06	3.29298e+06	0	FALSE
+56.063VITNQYNNPAGLYSSENISNFNNALESK+56.063	sp|O00151|PDLI1_HUMAN	19052640	11961877	2.66678e+06	13034966	5303737	1.79203e+06	0	FALSE
+56.063GINSSNVENQLQATQAAR	tr|J3QLL0|J3QLL0_HUMAN;tr|J3KS65|J3KS65_HUMAN;sp|P52292|IMA1_HUMAN	51489024	25539332	2.86446e+06	27183888	13449634	12629055	0	FALSE
+56.063AGGAGVPAFYTPTGYGTLVQEGGSPIK+56.063	sp|P55809|SCOT1_HUMAN	13980482	6984895	783895	5107476	450467	2224163	0	FALSE
+56.063AFLADPSAFVAAAPVAAATTAAPAAAAAPAK+56.063	tr|F8VWS0|F8VWS0_HUMAN;tr|F8W1K8|F8W1K8_HUMAN;sp|P05388|RLA0_HUMAN;sp|P05388-2|RLA0_HUMAN	56668924	30575116	4.03909e+06	25989880	5.37344e+06	12930338	0	FALSE
+56.063QAFTDVATGSLGQGLGAAC+57.021GM+15.995AYTGK+56.063	tr|F8W888|F8W888_HUMAN;tr|E9PFF2|E9PFF2_HUMAN;sp|P29401|TKT_HUMAN;sp|P29401-2|TKT_HUMAN	30669878	15591333	3.33861e+06	16092564	2.37874e+06	3709837	0	FALSE
+56.063TGAPQYGSYGTAPVNLNIK+56.063	tr|A0A0B4J203|A0A0B4J203_HUMAN;sp|Q6UN15|FIP1_HUMAN;sp|Q6UN15-3|FIP1_HUMAN;sp|Q6UN15-4|FIP1_HUMAN;sp|Q6UN15-5|FIP1_HUMAN	13174278	7015160	0	8.14066e+06	0	5500366	0	FALSE
+56.063SGTQDIQPGPLFNNNADGVATDITSTR	tr|C9J6P4|C9J6P4_HUMAN;sp|Q7Z2W4|ZCCHV_HUMAN;sp|Q7Z2W4-2|ZCCHV_HUMAN;sp|Q7Z2W4-3|ZCCHV_HUMAN	19996774	8965300	2.90439e+06	10849684	2.96871e+06	9382815	0	FALSE
+56.063LASPSGSTSSGLEVVAPEGTSAPGGGPGTLDDSATIC+57.021R	tr|M0R0K9|M0R0K9_HUMAN;sp|Q13263|TIF1B_HUMAN;sp|Q13263-2|TIF1B_HUMAN	43468324	24427378	8.12882e+06	21649486	4.02839e+06	9831286	0	FALSE
+56.063SQEATEAAPSC+57.021VGDMADTPR	tr|K7EJL9|K7EJL9_HUMAN;tr|K7ER14|K7ER14_HUMAN;sp|Q9UHD8|SEPT9_HUMAN;sp|Q9UHD8-2|SEPT9_HUMAN;sp|Q9UHD8-3|SEPT9_HUMAN;sp|Q9UHD8-5|SEPT9_HUMAN;sp|Q9UHD8-7|SEPT9_HUMAN	29750790	14506899	1.09165e+06	26399208	7.12362e+06	11791146	0.000969982	FALSE
+56.063YDSIPVSTSLLGDTSDTTSTGLAQR	tr|D6RB92|D6RB92_HUMAN;sp|Q5JS54|PSMG4_HUMAN;sp|Q5JS54-2|PSMG4_HUMAN;sp|Q5JS54-3|PSMG4_HUMAN	14645951	8.15931e+06	767579	8854136	1.20077e+06	3.13848e+06	0	FALSE
+56.063SQEATEAAPSC+57.021VGDM+15.995ADTPR	tr|K7EJL9|K7EJL9_HUMAN;tr|K7ER14|K7ER14_HUMAN;sp|Q9UHD8|SEPT9_HUMAN;sp|Q9UHD8-2|SEPT9_HUMAN;sp|Q9UHD8-3|SEPT9_HUMAN;sp|Q9UHD8-5|SEPT9_HUMAN;sp|Q9UHD8-7|SEPT9_HUMAN	17905692	11514553	3.36796e+06	9488398	1.65509e+06	4.76031e+06	0.000969982	FALSE
+56.063TVLMNPNIASVQTNEVGLK+56.063	tr|Q5R211|Q5R211_HUMAN;sp|P31327|CPSM_HUMAN;sp|P31327-2|CPSM_HUMAN;sp|P31327-3|CPSM_HUMAN	81460696	40404332	272295	37147356	5.33475e+06	16083039	0	FALSE
+56.063GAAAAAAASGAAGGGGGGAGAGAPGGGR	sp|Q68E01|INT3_HUMAN;sp|Q68E01-2|INT3_HUMAN	10854892	5.89228e+06	274941	5.95302e+06	2.54536e+06	2112991	0.000969982	FALSE
+56.063AVAAAAAASAAASGGPSAAPSGENEAESR	sp|O15164|TIF1A_HUMAN;sp|O15164-2|TIF1A_HUMAN	15922529	6636848	363059	7353420	1.39133e+06	3164563	0	FALSE
+56.063AQFAQPEILIGTIPGAGGTQR	sp|P30084|ECHM_HUMAN	155104864	84700912	13287461	84205400	15359266	48375092	0	FALSE
+56.063AQGPAASAEEPK+56.063PVEAPAANSDQTVTVK+56.063E	sp|P80723|BASP1_HUMAN;sp|P80723-2|BASP1_HUMAN	368241088	193229152	18591822	184964768	35655896	115326352	0	FALSE
+56.063NM+15.995GGPYGGGNYGPGGSGGSGGYGGR	sp|P22626|ROA2_HUMAN;sp|P22626-2|ROA2_HUMAN	5.3813e+06	5.93043e+06	2.25158e+06	1.8534e+06	750530	2718936	0	FALSE
+56.063ALLAPLVAPEAGEAEPGSQER	tr|E9PM83|E9PM83_HUMAN;tr|E9PP09|E9PP09_HUMAN;tr|C9JHT2|C9JHT2_HUMAN;tr|A8MX29|A8MX29_HUMAN;tr|E9PI24|E9PI24_HUMAN;tr|E9PQ02|E9PQ02_HUMAN;sp|Q9H0B6|KLC2_HUMAN;sp|Q9H0B6-2|KLC2_HUMAN	33384836	18418396	2.24928e+06	18487636	3.87468e+06	6.61198e+06	0.000969982	FALSE
+56.063LLEGDGGPNTGGM+15.995GAYC+57.021PAPQVSNDLLLK+56.063	tr|F8WD69|F8WD69_HUMAN;sp|P22102|PUR2_HUMAN;sp|P22102-2|PUR2_HUMAN	26019366	17271584	4.67802e+06	11254286	4348516	5.51384e+06	0	FALSE
+56.063IATTTASAATAAAIGATPR	tr|H0YFY6|H0YFY6_HUMAN;tr|A0A087WY61|A0A087WY61_HUMAN;sp|Q14980|NUMA1_HUMAN;sp|Q14980-2|NUMA1_HUMAN;sp|Q14980-5|NUMA1_HUMAN	56632908	41252800	0	24081788	2.11132e+06	10353877	0	FALSE
+56.063GSYGDLGGPIITTQVTIPK+56.063	tr|Q5T6W2|Q5T6W2_HUMAN;tr|S4R359|S4R359_HUMAN;sp|P61978|HNRPK_HUMAN;sp|P61978-2|HNRPK_HUMAN;sp|P61978-3|HNRPK_HUMAN	246268624	116928168	13175322	117629232	24130646	59293796	0	FALSE
+56.063TVNELQNLTAAEVVVPR	sp|Q9NZI8|IF2B1_HUMAN;sp|Q9NZI8-2|IF2B1_HUMAN	15966078	8425863	1.50418e+06	7018531	1.49138e+06	2951289	0	FALSE
+56.063QGAIVAVTGDGVNDSPALK+56.063	tr|H0Y7C1|H0Y7C1_HUMAN;tr|B1AKY9|B1AKY9_HUMAN;tr|M0R116|M0R116_HUMAN;tr|A0A0A0MT26|A0A0A0MT26_HUMAN;tr|A0A2R8YEY8|A0A2R8YEY8_HUMAN;sp|P13637|AT1A3_HUMAN;sp|P13637-2|AT1A3_HUMAN;sp|P13637-3|AT1A3_HUMAN;sp|P05023|AT1A1_HUMAN;sp|P05023-3|AT1A1_HUMAN;sp|P05023-4|AT1A1_HUMAN;sp|P50993|AT1A2_HUMAN	68891160	34761532	1.06954e+06	33204284	4.11814e+06	13841720	0	FALSE
+56.063LASPSGSTSSGLEVVAPEGTSAPGGGPGTLDDSATIC+57.021R	tr|M0R0K9|M0R0K9_HUMAN;sp|Q13263|TIF1B_HUMAN;sp|Q13263-2|TIF1B_HUMAN	124974688	61574392	23144082	60396344	13973724	31236574	0	FALSE
+56.063VITNQYNNPAGLYSSENISNFNNALESK+56.063	sp|O00151|PDLI1_HUMAN	18995962	12046279	2.95762e+06	13847358	5751107	2.3322e+06	0	FALSE
+56.063EVIAVSC+57.021GPAQC+57.021QETIR	sp|P38117|ETFB_HUMAN;sp|P38117-2|ETFB_HUMAN	23806514	13223389	947680	13116508	3.1759e+06	11835902	0	FALSE
+56.063LVQDVANNTNEEAGDGTTTATVLAR	tr|E7EXB4|E7EXB4_HUMAN;tr|C9JL25|C9JL25_HUMAN;tr|E7ESH4|E7ESH4_HUMAN;sp|P10809|CH60_HUMAN;sp|P10809-2|CH60_HUMAN	4795858944	2644678400	560552640	2533565952	654064128	1285111680	0	FALSE
+56.063DVAWAPSIGLPTSTIASC+57.021SQDGR	tr|A8MXL6|A8MXL6_HUMAN;sp|P55735|SEC13_HUMAN;sp|P55735-2|SEC13_HUMAN;sp|P55735-3|SEC13_HUMAN;sp|P55735-4|SEC13_HUMAN	7.12038e+06	3.90226e+06	1.12175e+06	3.83507e+06	950080	2.25732e+06	0	FALSE
+56.063SSPEVSSINQEALVLTAK+56.063	tr|E5RGS9|E5RGS9_HUMAN;sp|Q9NRG0|CHRC1_HUMAN	28288252	11930331	4.48623e+06	14366241	2.71053e+06	7.40492e+06	0	FALSE
+56.063AQGPAASAEEPK+56.063PVEAPAANSDQTVTVK+56.063E	sp|P80723|BASP1_HUMAN;sp|P80723-2|BASP1_HUMAN	376840416	195101440	18308936	188830544	36625424	117899920	0	FALSE
+56.063IPSAVGYQPTLATDMGTMQER	tr|F8W0P7|F8W0P7_HUMAN;tr|F8W079|F8W079_HUMAN;tr|H0YH81|H0YH81_HUMAN;tr|H0YI37|H0YI37_HUMAN;sp|P06576|ATPB_HUMAN	192085696	95970920	15640657	93757080	13267414	42869232	0.000969982	FALSE
+56.063MTEEPLMC+57.021AYC+57.021VTEPGAGSDVAGIK+56.063	tr|Q5T4U5|Q5T4U5_HUMAN;tr|B7Z9I1|B7Z9I1_HUMAN;sp|P11310|ACADM_HUMAN;sp|P11310-2|ACADM_HUMAN	21524810	14503342	3.26036e+06	11421082	2614036	2.83929e+06	0	FALSE
+56.063FIQQTYPSGGEEQAQYC+57.021R	tr|A0A3B3IT07|A0A3B3IT07_HUMAN;tr|F8WBR8|F8WBR8_HUMAN;tr|F8WEQ7|F8WEQ7_HUMAN;tr|C9IZF9|C9IZF9_HUMAN;sp|Q8WUM4|PDC6I_HUMAN;sp|Q8WUM4-2|PDC6I_HUMAN;sp|Q8WUM4-3|PDC6I_HUMAN	19775044	9476589	1.2948e+06	10591062	1.50222e+06	3.54979e+06	0	FALSE
+56.063MTEEPLMC+57.021AYC+57.021VTEPGAGSDVAGIK+56.063	tr|Q5T4U5|Q5T4U5_HUMAN;tr|B7Z9I1|B7Z9I1_HUMAN;sp|P11310|ACADM_HUMAN;sp|P11310-2|ACADM_HUMAN	28263412	13593342	4743099	12880776	4.39599e+06	4517524	0	FALSE
+56.063LEQQVPVNQVFGQDEM+15.995IDVIGVTK+56.063	tr|G5E9G0|G5E9G0_HUMAN;tr|H7C422|H7C422_HUMAN;tr|B5MCW2|B5MCW2_HUMAN;tr|H7C3M2|H7C3M2_HUMAN;sp|P39023|RL3_HUMAN	30037508	17599612	1.15578e+06	14564039	3480294	5690395	0	FALSE
+56.063VLDNYLTSPLPEEVDETSAEDEGVSQR	sp|O00299|CLIC1_HUMAN	27554900	14686354	4.21032e+06	12781532	4130483	5.16994e+06	0	FALSE
+56.063ESTGAQVQVAGDMLPNSTER	tr|E9PFP8|E9PFP8_HUMAN;tr|F8VZX2|F8VZX2_HUMAN;tr|F8VXH9|F8VXH9_HUMAN;tr|F8W0G4|F8W0G4_HUMAN;tr|J3QT27|J3QT27_HUMAN;tr|H3BRU6|H3BRU6_HUMAN;sp|Q15366|PCBP2_HUMAN;sp|Q15366-2|PCBP2_HUMAN;sp|Q15366-3|PCBP2_HUMAN;sp|Q15366-4|PCBP2_HUMAN;sp|Q15366-5|PCBP2_HUMAN;sp|Q15366-6|PCBP2_HUMAN;sp|Q15366-7|PCBP2_HUMAN;sp|Q15366-8|PCBP2_HUMAN;sp|Q15365|PCBP1_HUMAN;sp|P57721|PCBP3_HUMAN;sp|P57721-2|PCBP3_HUMAN;sp|…	263099568	140214224	16242590	138076464	21665606	52913192	0	FALSE
+56.063LVTSPC+57.021C+57.021IVTSTYGWTANM+15.995ER	sp|P07900|HS90A_HUMAN;sp|P07900-2|HS90A_HUMAN	70247384	37802656	7.32461e+06	40470752	8924173	14793155	0	FALSE
+56.063TITYQAVPSEVPNEEPK+56.063	tr|F8WAE5|F8WAE5_HUMAN;tr|H7C5R5|H7C5R5_HUMAN;sp|Q9BY44|EIF2A_HUMAN;sp|Q9BY44-2|EIF2A_HUMAN;sp|Q9BY44-3|EIF2A_HUMAN;sp|Q9BY44-4|EIF2A_HUMAN	22228350	9887910	2295743	10618940	0	6161607	0	FALSE
+56.063LASGETVAAFC+57.021LTEPSSGSDAASIR	sp|P49748|ACADV_HUMAN;sp|P49748-2|ACADV_HUMAN;sp|P49748-3|ACADV_HUMAN	18258262	7447655	2642311	7.42339e+06	1.47498e+06	3.20284e+06	0	FALSE
+56.063SSSTGSSSSTGGGGQESQPSPLALLAATC+57.021SR	tr|H3BVI2|H3BVI2_HUMAN;sp|P08047|SP1_HUMAN;sp|P08047-2|SP1_HUMAN	10491307	4.05979e+06	880011	4.75367e+06	830513	6452917	0	FALSE
+56.063AAAAAAAAVPSAGPAGPAPTSAAGR	sp|Q9Y4H2|IRS2_HUMAN	28536190	15015141	4766130	14537393	2827898	6787133	0	FALSE
+56.063LQQQAALSPTTAPAVSSVSK+56.063	tr|A0A0U1RRM1|A0A0U1RRM1_HUMAN;tr|A0A0U1RR30|A0A0U1RR30_HUMAN;sp|Q8WXI9|P66B_HUMAN	14223383	6075140	10305151	5.37928e+06	0	2913175	0.000969982	FALSE
+56.063FSNSIPQSQTGNSETATPTNVDLPQVIPK+56.063	sp|P46087|NOP2_HUMAN;sp|P46087-2|NOP2_HUMAN;sp|P46087-4|NOP2_HUMAN	57044256	29998414	6393373	27072818	7.44368e+06	11556282	0	FALSE
+56.063SQEATEAAPSC+57.021VGDM+15.995ADTPR	tr|K7EJL9|K7EJL9_HUMAN;tr|K7ER14|K7ER14_HUMAN;sp|Q9UHD8|SEPT9_HUMAN;sp|Q9UHD8-2|SEPT9_HUMAN;sp|Q9UHD8-3|SEPT9_HUMAN;sp|Q9UHD8-5|SEPT9_HUMAN;sp|Q9UHD8-7|SEPT9_HUMAN	9062886	5.49892e+06	1.36032e+06	3883370	2.07108e+06	3250226	0.000969982	FALSE
+56.063VLDNYLTSPLPEEVDETSAEDEGVSQR	sp|O00299|CLIC1_HUMAN	88884032	49065488	11850855	47747044	9492477	22737620	0	FALSE
+56.063LASFSPSPPSPYPTTVGPVESSGLR	sp|Q96SK2|TM209_HUMAN;sp|Q96SK2-2|TM209_HUMAN;sp|Q96SK2-3|TM209_HUMAN	14217499	6987528	984294	4464997	8909778	5.34291e+06	0	FALSE
+56.063GVGIISEGNETVEDIAAR	tr|H0Y7C1|H0Y7C1_HUMAN;tr|B1AKY9|B1AKY9_HUMAN;tr|M0R116|M0R116_HUMAN;tr|A0A0A0MT26|A0A0A0MT26_HUMAN;tr|A0A2R8YEY8|A0A2R8YEY8_HUMAN;sp|P13637|AT1A3_HUMAN;sp|P13637-2|AT1A3_HUMAN;sp|P13637-3|AT1A3_HUMAN;sp|P05023|AT1A1_HUMAN;sp|P05023-3|AT1A1_HUMAN;sp|P05023-4|AT1A1_HUMAN;sp|P50993|AT1A2_HUMAN	15877425	5.72736e+06	7924044	8.10553e+06	6.58041e+06	5845289	0	FALSE
+56.063LASEPQDPAAVSLPTSSVPETR	tr|H7C202|H7C202_HUMAN;tr|H7C173|H7C173_HUMAN;tr|H7BZ50|H7BZ50_HUMAN;tr|B8ZZ87|B8ZZ87_HUMAN;sp|Q6P582|MZT2A_HUMAN;sp|Q6NZ67|MZT2B_HUMAN	40589440	20094934	3.15703e+06	20881466	2.46288e+06	9344184	0	FALSE
+56.063DAQDVQASQAEADQQQTR	tr|A0A087WVV2|A0A087WVV2_HUMAN;tr|F8W7S5|F8W7S5_HUMAN;sp|Q9P2E9|RRBP1_HUMAN;sp|Q9P2E9-3|RRBP1_HUMAN	1.48662e+06	876613	70029.4	700991	127067	238561	0	FALSE
+56.063TIQNSSVSPTSSSSSSSSTGETQTQSSSR	sp|Q7Z417|NUFP2_HUMAN	11967385	7.16839e+06	913174	8085200	1.49547e+06	3558566	0	FALSE
+56.063LVQDVANNTNEEAGDGTTTATVLAR	tr|E7EXB4|E7EXB4_HUMAN;tr|C9JL25|C9JL25_HUMAN;tr|E7ESH4|E7ESH4_HUMAN;sp|P10809|CH60_HUMAN;sp|P10809-2|CH60_HUMAN	5.06523e+06	3.16885e+06	477705	2.73796e+06	712055	1472800	0.000897817	FALSE
+56.063TVIGELPPASSGSALAANVC+57.021K+56.063	sp|Q86VP6|CAND1_HUMAN;sp|Q86VP6-2|CAND1_HUMAN	190807008	99077648	10088499	96002168	12796093	40779168	0	FALSE
+56.063TTTVNIGSISTADGSALVK+56.063	sp|Q96B26|EXOS8_HUMAN	18418020	8.32911e+06	1.02373e+06	8397523	3.36051e+06	5450430	0	FALSE
+56.063TASISSSPSEGTPTVGSYGC+57.021TPQSLPK+56.063	sp|Q6PKG0|LARP1_HUMAN;sp|Q6PKG0-3|LARP1_HUMAN	11156590	3.94089e+06	0	3085426	690269	2.9597e+06	0	FALSE
+56.063LASPSGSTSSGLEVVAPEGTSAPGGGPGTLDDSATIC+57.021R	tr|M0R0K9|M0R0K9_HUMAN;sp|Q13263|TIF1B_HUMAN;sp|Q13263-2|TIF1B_HUMAN	43545584	24172822	8511904	21466820	4664389	9498082	0	FALSE
+56.063ELEQVC+57.021NPIISGLYQGAGGPGPGGFGAQGPK+56.063	tr|V9GZ37|V9GZ37_HUMAN;tr|A0A0G2JIW1|A0A0G2JIW1_HUMAN;sp|P0DMV9|HS71B_HUMAN;sp|P0DMV8|HS71A_HUMAN;sp|P0DMV8-2|HS71A_HUMAN	12264771	6998614	1.42235e+06	6.04184e+06	2.49033e+06	3227637	0	FALSE
+56.063TVESGLEVAAAPSVTPQAGTALLAPFPTQR	tr|A6NEM2|A6NEM2_HUMAN;sp|P51610|HCFC1_HUMAN;sp|P51610-2|HCFC1_HUMAN;sp|P51610-4|HCFC1_HUMAN	8779253	4450741	1.20437e+06	5.18688e+06	546933	2.33659e+06	0	FALSE
+56.063LSDALAVEDDQVAPVPLNVVETSSSVR	sp|Q86UP2|KTN1_HUMAN;sp|Q86UP2-2|KTN1_HUMAN;sp|Q86UP2-3|KTN1_HUMAN;sp|Q86UP2-4|KTN1_HUMAN	11893063	5.81373e+06	1.27265e+06	5.73143e+06	1.27418e+06	3447421	0	FALSE
+56.063SSGTASSVAFTPLQGLEIVNPQAAEK+56.063	tr|E7EVX8|E7EVX8_HUMAN;sp|Q8WWY3|PRP31_HUMAN	13736420	6.88334e+06	245530	7.51494e+06	1021960	3138245	0	FALSE
+56.063EQFDTLTPEPPVDPNQEVPPGPPR	tr|H0YC33|H0YC33_HUMAN;tr|A0A0B4J210|A0A0B4J210_HUMAN;tr|E5RH50|E5RH50_HUMAN;sp|Q6PKG0|LARP1_HUMAN;sp|Q6PKG0-3|LARP1_HUMAN	48698724	31465582	18737216	15277024	16806966	24631784	0	FALSE
+56.063ELEQVC+57.021NPIISGLYQGAGGPGPGGFGAQGPK+56.063	tr|V9GZ37|V9GZ37_HUMAN;tr|A0A0G2JIW1|A0A0G2JIW1_HUMAN;sp|P0DMV9|HS71B_HUMAN;sp|P0DMV8|HS71A_HUMAN;sp|P0DMV8-2|HS71A_HUMAN	12134760	7022611	2.73766e+06	6.42367e+06	2.43238e+06	3.55464e+06	0	FALSE
+56.063APLATGEDDDDEVPDLVENFDEASK+56.063NEAN	sp|P20290|BTF3_HUMAN;sp|P20290-2|BTF3_HUMAN	48763948	27526920	4.35773e+06	21396364	2.48775e+06	16157132	0	FALSE
+56.063LVTSPC+57.021C+57.021IVTSTYGWTANMER	sp|P07900|HS90A_HUMAN;sp|P07900-2|HS90A_HUMAN	18996264	9715891	1.79743e+06	11444035	1.38157e+06	4199294	0	FALSE
+56.063GLVEPVDVVDNADGTQTVNYVPSR	tr|Q60FE5|Q60FE5_HUMAN;tr|A0A087WWY3|A0A087WWY3_HUMAN;sp|P21333|FLNA_HUMAN;sp|P21333-2|FLNA_HUMAN	140425584	67368080	11978151	75597096	15973768	34389716	0.000969982	FALSE
+56.063LVSPGSANETSSILVESVTR	tr|E7EN95|E7EN95_HUMAN;tr|A0A0A0MT44|A0A0A0MT44_HUMAN;sp|O75369|FLNB_HUMAN;sp|O75369-2|FLNB_HUMAN;sp|O75369-3|FLNB_HUMAN;sp|O75369-7|FLNB_HUMAN;sp|O75369-6|FLNB_HUMAN;sp|O75369-8|FLNB_HUMAN;sp|O75369-9|FLNB_HUMAN	10037048	5.18577e+06	532891	5.17832e+06	3.43441e+06	2.38038e+06	0	FALSE
+56.063EGPYDVVVLPGGNLGAQNLSESAAVK+56.063	tr|K7EN27|K7EN27_HUMAN;sp|Q99497|PARK7_HUMAN	15268245	7752799	1.21832e+06	6820185	1.02359e+06	2.51423e+06	0	FALSE
+56.063TFTDC+57.021FNC+57.021LPIAAIVDEK+56.063	tr|F8W0W8|F8W0W8_HUMAN;tr|E7ETD8|E7ETD8_HUMAN;tr|H0Y3Y6|H0Y3Y6_HUMAN;tr|F8VR82|F8VR82_HUMAN;tr|F8VYE8|F8VYE8_HUMAN;sp|P62136|PP1A_HUMAN;sp|P62136-2|PP1A_HUMAN;sp|P62136-3|PP1A_HUMAN;sp|P36873|PP1G_HUMAN;sp|P36873-2|PP1G_HUMAN;sp|P62140|PP1B_HUMAN	246331	153623	0	150746	0	0	0.000969982	FALSE
+56.063YIYDQC+57.021PAVAGYGPIEQLPDYNR	sp|P31930|QCR1_HUMAN	21138348	10212195	2.60472e+06	12173326	3.80998e+06	5.81014e+06	0.000969982	FALSE
+56.063SSLQYSSPAPDGC+57.021GDQTLGDLLLTPTR	sp|P22102|PUR2_HUMAN	10329139	4966488	621571	5.92995e+06	895614	2.82727e+06	0	FALSE
+56.063SQEATEAAPSC+57.021VGDMADTPR	tr|K7EJL9|K7EJL9_HUMAN;tr|K7ER14|K7ER14_HUMAN;sp|Q9UHD8|SEPT9_HUMAN;sp|Q9UHD8-2|SEPT9_HUMAN;sp|Q9UHD8-3|SEPT9_HUMAN;sp|Q9UHD8-5|SEPT9_HUMAN;sp|Q9UHD8-7|SEPT9_HUMAN	10121114	4742040	0	10195933	2.83115e+06	4759534	0	FALSE
+56.063VVAPTISSPVC+57.021QEQLVEAGR	sp|Q9Y490|TLN1_HUMAN	36033328	17913794	2.49047e+06	17632986	3.65787e+06	6885101	0	FALSE
+56.063QAFTDVATGSLGQGLGAAC+57.021GMAYTGK+56.063	tr|F8W888|F8W888_HUMAN;tr|E9PFF2|E9PFF2_HUMAN;sp|P29401|TKT_HUMAN;sp|P29401-2|TKT_HUMAN	24275828	15725650	2.018e+06	14565018	4.78066e+06	8947196	0	FALSE
+56.063QTSGGPVDASSEYQQELER	tr|A8MUH2|A8MUH2_HUMAN;sp|P18859|ATP5J_HUMAN;sp|P18859-2|ATP5J_HUMAN	14171151	7.73781e+06	1.22727e+06	6448813	2.25592e+06	3.50508e+06	0	FALSE
+56.063LLEDGEDFNLGDALDSSNSM+15.995QTIQK+56.063	sp|P05783|K1C18_HUMAN	172428528	92785512	13369339	84664552	25062290	59562812	0	FALSE
+56.063LLEDGEDFNLGDALDSSNSMQTIQK+56.063	sp|P05783|K1C18_HUMAN	75012624	42537536	6.28497e+06	40333080	4965351	8899572	0	FALSE
+56.063LLEDGEDFNLGDALDSSNSMQTIQK+56.063	sp|P05783|K1C18_HUMAN	4.54682e+06	2.68914e+06	0	3.07536e+06	0	1.79364e+06	0	FALSE
+56.063TASISSSPSEGTPTVGSYGC+57.021TPQSLPK+56.063	sp|Q6PKG0|LARP1_HUMAN;sp|Q6PKG0-3|LARP1_HUMAN	21232812	10679613	0	7979474	2.52933e+06	5.64843e+06	0	FALSE
+56.063GLTTTGNSSLNSTSNTK+56.063	sp|Q96KR1|ZFR_HUMAN	19963330	10137098	412879	11156405	1.55616e+06	5497057	0	FALSE
+56.063VFQSSTSQEQVYNDC+57.021AK+56.063	sp|P33176|KINH_HUMAN	7698864	3.68495e+06	447883	4.52757e+06	1.06252e+06	1.07738e+06	0	FALSE
+56.063SSSPAPADIAQTVQEDLR	sp|Q13283|G3BP1_HUMAN	27617482	16925724	2.43354e+06	16109441	3859702	6.86568e+06	0	FALSE
+56.063SQVFSTAADGQTQVEIK+56.063	sp|P38646|GRP75_HUMAN	88838936	45317544	3.23274e+06	50751272	8957324	24432290	0	FALSE
+56.063VQANLGAPDINIEGLDAK+56.063	sp|Q09666|AHNK_HUMAN	47996752	24198992	1.21519e+06	22922920	3.68632e+06	10881387	0	FALSE
+56.063AASADSTTEGTPADGFTVLSTK+56.063	sp|O75367|H2AY_HUMAN;sp|O75367-2|H2AY_HUMAN;sp|O75367-3|H2AY_HUMAN	21093862	5.11835e+06	6173771	9024910	0	0	0	FALSE
+56.063VSVPLIAQGNSYPSETTVK+56.063	sp|P11047|LAMC1_HUMAN	47064076	26572538	6.34284e+06	31313884	3.29419e+06	6.43837e+06	0	FALSE
+56.063AADSQNSGEGNTGAAESSFSQEVSR	sp|P12270|TPR_HUMAN	12905516	4.71731e+06	795913	6917322	641916	3.97437e+06	0	FALSE
+56.063TPAALAALSLTGSGTPPTAANYPSSSR	sp|Q9UQ35|SRRM2_HUMAN	43917724	24687262	2649861	25287920	2.21021e+06	10718492	0.000969982	FALSE
+56.063TVESGLEVAAAPSVTPQAGTALLAPFPTQR	tr|A6NEM2|A6NEM2_HUMAN;sp|P51610|HCFC1_HUMAN;sp|P51610-2|HCFC1_HUMAN;sp|P51610-4|HCFC1_HUMAN	3.55612e+06	2.14088e+06	42861.1	1.68697e+06	699973	1.00875e+06	0	FALSE
+56.063YIYDQC+57.021PAVAGYGPIEQLPDYNR	sp|P31930|QCR1_HUMAN	20659248	12029937	2173088	12358448	1.75236e+06	6499984	0.000969982	FALSE
+56.063IFTASNVSSVPLPAENVTITAGQR	tr|Q5VU77|Q5VU77_HUMAN;tr|F8W726|F8W726_HUMAN;sp|Q14157|UBP2L_HUMAN;sp|Q14157-1|UBP2L_HUMAN;sp|Q14157-3|UBP2L_HUMAN;sp|Q14157-4|UBP2L_HUMAN;sp|Q14157-5|UBP2L_HUMAN	72211256	37741736	6.19949e+06	39209336	8520778	18487246	0	FALSE
+56.063LAQQYYLVYQEPIPTAQLVQR	tr|A0A024RA52|A0A024RA52_HUMAN;tr|C9JCK5|C9JCK5_HUMAN;sp|P25787|PSA2_HUMAN	18638066	9559555	2.23091e+06	8628367	2.75686e+06	2.38633e+06	0	FALSE
+56.063TGIEQGSDAGYLC+57.021ESQK+56.063	tr|H0YFD6|H0YFD6_HUMAN;tr|A0A2R8Y4F5|A0A2R8Y4F5_HUMAN;tr|A0A2R8YG21|A0A2R8YG21_HUMAN;sp|P40939|ECHA_HUMAN	19398752	10284767	795450	11922278	3808672	6299761	0	FALSE
+56.063LAQQQAAAAAAAAAAASQQGSAK+56.063	tr|A0A1B0GUU2|A0A1B0GUU2_HUMAN;tr|A0A0D9SF63|A0A0D9SF63_HUMAN;tr|F8W9D8|F8W9D8_HUMAN;tr|C9IYU9|C9IYU9_HUMAN;tr|C9JLJ1|C9JLJ1_HUMAN;tr|C9JBN1|C9JBN1_HUMAN;tr|C9JCK0|C9JCK0_HUMAN;tr|A0A0D9SF25|A0A0D9SF25_HUMAN;sp|Q9BZK7|TBL1R_HUMAN	26071432	14347651	939007	13484389	2266335	2991748	0	FALSE
+56.063LLEDGEDFNLGDALDSSNSM+15.995QTIQK+56.063	sp|P05783|K1C18_HUMAN	7856701	4505760	0	5.74021e+06	6.70832e+06	6.02171e+06	0	FALSE
+56.063SSLQYSSPAPDGC+57.021GDQTLGDLLLTPTR	sp|P22102|PUR2_HUMAN	10270958	5005656	806984	5443498	1144928	2154160	0	FALSE
+56.063SSLQYSSPAPDGC+57.021GDQTLGDLLLTPTR	sp|P22102|PUR2_HUMAN	10294711	5001357	816406	5.42785e+06	1171257	2.16424e+06	0	FALSE
+56.063VIVVGNPANTNC+57.021LTASK+56.063	tr|B9A041|B9A041_HUMAN;tr|C9JF79|C9JF79_HUMAN;tr|C9JRL4|C9JRL4_HUMAN;sp|P40925|MDHC_HUMAN;sp|P40925-2|MDHC_HUMAN;sp|P40925-3|MDHC_HUMAN	257114032	138957168	12949458	148221184	26084576	57175412	0	FALSE
+56.063ILATPPQEDAPSVDIANIR	tr|A0A0B4J1R6|A0A0B4J1R6_HUMAN;tr|E9PFF2|E9PFF2_HUMAN;sp|P29401|TKT_HUMAN;sp|P29401-2|TKT_HUMAN	1503451520	724294848	109345640	820019648	163786272	417227616	0	FALSE
+56.063AFLADPSAFVAAAPVAAATTAAPAAAAAPAK+56.063	tr|F8VWS0|F8VWS0_HUMAN;tr|F8W1K8|F8W1K8_HUMAN;sp|P05388|RLA0_HUMAN;sp|P05388-2|RLA0_HUMAN	71826280	37512620	5.34493e+06	35720276	8539436	18895094	0	FALSE
+56.063SSEM+15.995NVLIPTEGGDFNEFPVPEQFK+56.063	sp|Q01518|CAP1_HUMAN;sp|Q01518-2|CAP1_HUMAN	7632285	4.10906e+06	463405	3.5194e+06	2.00469e+06	2341451	0	FALSE
+56.063TSLAGDTSNSSSPASTGAK+56.063	tr|H0Y6T5|H0Y6T5_HUMAN;tr|H3BPE1|H3BPE1_HUMAN;tr|H0Y4F5|H0Y4F5_HUMAN;tr|H0Y390|H0Y390_HUMAN;tr|H0Y314|H0Y314_HUMAN;tr|H3BQK9|H3BQK9_HUMAN;sp|Q9UPN3|MACF1_HUMAN;sp|Q9UPN3-2|MACF1_HUMAN;sp|Q9UPN3-3|MACF1_HUMAN;sp|Q9UPN3-4|MACF1_HUMAN;sp|Q9UPN3-5|MACF1_HUMAN	6.72595e+06	3.47731e+06	619526	3.90207e+06	1.44663e+06	2043775	0	FALSE
+56.063GEVPC+57.021TVTSASPLEEATLSELK+56.063	tr|H7C068|H7C068_HUMAN;sp|P48047|ATPO_HUMAN	45523324	24515370	3.22228e+06	22635912	3741100	15640687	0	FALSE
+56.063GNAGQSNYGFANSAM+15.995ER	tr|A0A0U1RQF0|A0A0U1RQF0_HUMAN;sp|P49327|FAS_HUMAN	3.0224e+06	2.89798e+06	1.54574e+06	2.30089e+06	600555	1.29362e+06	0	FALSE
+56.063LLEDGEDFNLGDALDSSNSMQTIQK+56.063	sp|P05783|K1C18_HUMAN	77075344	41852884	6500459	39182692	4.9611e+06	9423764	0	FALSE
+56.063VTTEIQLPSQSPVEEQSPASLSSLR	tr|F8WD26|F8WD26_HUMAN;tr|A0A0A0MTE2|A0A0A0MTE2_HUMAN;tr|J3KP06|J3KP06_HUMAN;tr|E9PMP7|E9PMP7_HUMAN;tr|E9PMS6|E9PMS6_HUMAN;tr|H0Y424|H0Y424_HUMAN;tr|E9PMT2|E9PMT2_HUMAN;sp|Q8WWI1|LMO7_HUMAN;sp|Q8WWI1-2|LMO7_HUMAN;sp|Q8WWI1-3|LMO7_HUMAN;sp|Q8WWI1-4|LMO7_HUMAN;sp|Q8WWI1-5|LMO7_HUMAN	27915910	13568772	1.97779e+06	13564447	2.87061e+06	6534959	0	FALSE
+56.063FSNSIPQSQTGNSETATPTNVDLPQVIPK+56.063	sp|P46087|NOP2_HUMAN;sp|P46087-2|NOP2_HUMAN;sp|P46087-4|NOP2_HUMAN	54415676	29538710	4.09532e+06	25688128	14717091	16319316	0	FALSE
+56.063FLDPLPTSGITPGATVLTASGQTVGK+56.063	sp|Q5T440|CAF17_HUMAN	7.47485e+06	4.37989e+06	683297	3.42288e+06	0	1.41667e+06	0	FALSE
+56.063LVTSPC+57.021C+57.021IVTSTYGWTANMER	sp|P07900|HS90A_HUMAN;sp|P07900-2|HS90A_HUMAN	19028930	9815860	1.73118e+06	11417259	1.34008e+06	4.23566e+06	0	FALSE
+56.063QQLAQYQQQQSQASAPSTSR	sp|Q15007|FL2D_HUMAN	14919998	9167789	638822	8652489	1.35082e+06	2946550	0	FALSE
+56.063SLLVIPNTLAVNAAQDSTDLVAK+56.063	tr|F5H282|F5H282_HUMAN;tr|E7EQR6|E7EQR6_HUMAN;sp|P17987|TCPA_HUMAN	986441	362821	86616.4	142151	115862	103267	0.000969982	FALSE
+56.063EM+15.995EENFAVEAANYQDTIGR	tr|B0YJC4|B0YJC4_HUMAN;tr|B0YJC5|B0YJC5_HUMAN;sp|P08670|VIME_HUMAN	22684042	9544970	1517051	8931108	2161030	9406151	0	FALSE
+56.063LC+57.021YVALDFEQEM+15.995ATAASSSSLEK+56.063	tr|I3L4N8|I3L4N8_HUMAN;tr|A0A2R8Y793|A0A2R8Y793_HUMAN;tr|A0A2R8YEA7|A0A2R8YEA7_HUMAN;sp|P63261|ACTG_HUMAN;sp|P60709|ACTB_HUMAN;sp|Q6S8J3|POTEE_HUMAN	35938120	19747856	5.84303e+06	19657802	14975803	16937992	0	FALSE
+56.063TPSTMENDSSNLDPSQAPSLAQPLVFSNSK+56.063	tr|Q5VU77|Q5VU77_HUMAN;tr|F8W726|F8W726_HUMAN;sp|Q14157|UBP2L_HUMAN;sp|Q14157-1|UBP2L_HUMAN;sp|Q14157-3|UBP2L_HUMAN;sp|Q14157-4|UBP2L_HUMAN;sp|Q14157-5|UBP2L_HUMAN	13681018	8215223	2.91014e+06	7631768	4.06335e+06	4.62457e+06	0	FALSE
+62.100LSPPYSSPQEFAQDVGR	tr|M0R0K9|M0R0K9_HUMAN;sp|Q13263|TIF1B_HUMAN;sp|Q13263-2|TIF1B_HUMAN	115096328	59824920	3.09988e+06	64230828	15669885	23651790	0	FALSE
+56.063SGASGASAAPAASAAAALAPSATR	sp|Q7Z7K6|CENPV_HUMAN	21068150	7.7095e+06	5961969	9405488	3.62483e+06	6.09697e+06	0	FALSE
+56.063TPSYSISSTLNPQAPEFILGC+57.021TASK+56.063	tr|H3BQC6|H3BQC6_HUMAN;sp|Q14694|UBP10_HUMAN;sp|Q14694-2|UBP10_HUMAN;sp|Q14694-3|UBP10_HUMAN	5525034	7.34883e+06	2.92879e+06	3.53769e+06	3.42207e+06	1.76725e+06	0	FALSE
+56.063IDATQVEVNPFGETPEGQVVC+57.021FDAK+56.063	tr|E9PDQ8|E9PDQ8_HUMAN;sp|Q96I99|SUCB2_HUMAN;sp|Q96I99-2|SUCB2_HUMAN	5.75626e+06	5.05894e+06	2.73185e+06	4334492	3.20617e+06	3.23103e+06	0.000969982	FALSE
+56.063DLYANTVLSGGTTMYPGIADR	tr|A0A2R8Y793|A0A2R8Y793_HUMAN;sp|P63261|ACTG_HUMAN;sp|P60709|ACTB_HUMAN	4.06227e+06	8532478	1.62935e+06	5.05935e+06	2.21006e+06	6551737	0	FALSE
+56.063TSGVPSGFNFTAPPVLGK+56.063	tr|E9PKD2|E9PKD2_HUMAN;tr|A0A0A0MSW3|A0A0A0MSW3_HUMAN;tr|H0Y837|H0Y837_HUMAN;tr|B7ZAV2|B7ZAV2_HUMAN;sp|P35658|NU214_HUMAN;sp|P35658-2|NU214_HUMAN;sp|P35658-3|NU214_HUMAN;sp|P35658-4|NU214_HUMAN;sp|P35658-5|NU214_HUMAN	9555053	4.25093e+06	374887	4.31641e+06	1.56416e+06	2.11386e+06	0	FALSE
+56.063VLDNYLTSPLPEEVDETSAEDEGVSQR	sp|O00299|CLIC1_HUMAN	88620552	49345824	10635500	49032660	9093893	23193236	0	FALSE
+56.063LLEGDGGPNTGGM+15.995GAYC+57.021PAPQVSNDLLLK+56.063	tr|F8WD69|F8WD69_HUMAN;sp|P22102|PUR2_HUMAN;sp|P22102-2|PUR2_HUMAN	26083794	14873788	5160209	11661088	4.70341e+06	17590438	0	FALSE
+56.063VVAPTISSPVC+57.021QEQLVEAGR	sp|Q9Y490|TLN1_HUMAN	163003216	79380688	13132143	85023024	13178555	36123904	0	FALSE
+56.063AALETDENLLLC+57.021APTGAGK+56.063	sp|O75643|U520_HUMAN;sp|O75643-2|U520_HUMAN	117897448	61056376	7544889	62404992	10494058	29906490	0	FALSE
+56.063FSNSIPQSQTGNSETATPTNVDLPQVIPK+56.063	sp|P46087|NOP2_HUMAN;sp|P46087-2|NOP2_HUMAN;sp|P46087-4|NOP2_HUMAN	54912264	28867220	3.94674e+06	25855514	9796100	11667557	0	FALSE
+56.063AYSDPSTGEPATYGELQQR	tr|H0YDN1|H0YDN1_HUMAN;sp|Q15149|PLEC_HUMAN;sp|Q15149-2|PLEC_HUMAN;sp|Q15149-3|PLEC_HUMAN;sp|Q15149-4|PLEC_HUMAN;sp|Q15149-5|PLEC_HUMAN;sp|Q15149-6|PLEC_HUMAN;sp|Q15149-7|PLEC_HUMAN;sp|Q15149-8|PLEC_HUMAN;sp|Q15149-9|PLEC_HUMAN	91890816	48030436	6.97442e+06	49399452	9700311	22869624	0	FALSE
+56.063SSSTGSSSSTGGGGQESQPSPLALLAATC+57.021SR	tr|H3BVI2|H3BVI2_HUMAN;sp|P08047|SP1_HUMAN;sp|P08047-2|SP1_HUMAN	10489134	3901010	883807	4686773	846642	6402249	0	FALSE
+56.063TVITPDPNLSIDQVGVPR	sp|P24928|RPB1_HUMAN;sp|P24928-2|RPB1_HUMAN	11890324	5.16504e+06	271858	6249477	991337	1737963	0	FALSE
+56.063SSSPAPADIAQTVQEDLR	sp|Q13283|G3BP1_HUMAN	28875522	14904091	2.91216e+06	15830916	3.93711e+06	6652856	0	FALSE
+56.063TVESGLEVAAAPSVTPQAGTALLAPFPTQR	tr|A6NEM2|A6NEM2_HUMAN;sp|P51610|HCFC1_HUMAN;sp|P51610-2|HCFC1_HUMAN;sp|P51610-4|HCFC1_HUMAN	3572279	2.1283e+06	51184.2	1.67118e+06	716547	1.02509e+06	0	FALSE
+56.063AGAIAPC+57.021EVTVPAQNTGLGPEK+56.063	tr|G3V210|G3V210_HUMAN;tr|F8VRK7|F8VRK7_HUMAN;tr|F8VPE8|F8VPE8_HUMAN;tr|F8VWS0|F8VWS0_HUMAN;tr|F8VU65|F8VU65_HUMAN;tr|F8VQY6|F8VQY6_HUMAN;tr|F8VW21|F8VW21_HUMAN;sp|P05388|RLA0_HUMAN;sp|P05388-2|RLA0_HUMAN;sp|Q8NHW5|RLA0L_HUMAN	763618048	387464544	47658700	371823072	70326944	172711232	0	FALSE
+56.063SSSSVTTSETQPC+57.021TPSSSDYSDLQR	tr|K7EM16|K7EM16_HUMAN;sp|P50552|VASP_HUMAN	24254414	11218573	2.36049e+06	12716934	3009388	4100794	0	FALSE
+56.063LAALNPESNTAGLDIFAK+56.063	sp|O00299|CLIC1_HUMAN	26467076	14038090	1.911e+06	15074822	3.51815e+06	6031544	0	FALSE
+56.063IC+57.021SIYTQSGENSLVQEGSEASPIGK+56.063	sp|Q9Y4W2|LAS1L_HUMAN;sp|Q9Y4W2-2|LAS1L_HUMAN;sp|Q9Y4W2-3|LAS1L_HUMAN	15619572	9447806	0	10392610	4137477	4224685	0	FALSE
+56.063QAFTDVATGSLGQGLGAAC+57.021GM+15.995AYTGK+56.063	tr|F8W888|F8W888_HUMAN;tr|E9PFF2|E9PFF2_HUMAN;sp|P29401|TKT_HUMAN;sp|P29401-2|TKT_HUMAN	10073017	14115782	6.96643e+06	9779075	10041344	11215554	0	FALSE
+56.063TVESGLEVAAAPSVTPQAGTALLAPFPTQR	tr|A6NEM2|A6NEM2_HUMAN;sp|P51610|HCFC1_HUMAN;sp|P51610-2|HCFC1_HUMAN;sp|P51610-4|HCFC1_HUMAN	8634740	4673921	718165	5.43949e+06	508887	2.28745e+06	0	FALSE
+56.063QAFTDVATGSLGQGLGAAC+57.021GM+15.995AYTGK+56.063	tr|F8W888|F8W888_HUMAN;tr|E9PFF2|E9PFF2_HUMAN;sp|P29401|TKT_HUMAN;sp|P29401-2|TKT_HUMAN	4.48223e+06	3225573	1.208e+06	2.46714e+06	886703	1.24151e+06	0	FALSE
+56.063VLSSC+57.021PQAGEATLLAPSTEAGGGLTC+57.021ASAPQGTLR	sp|O15446|RPA34_HUMAN;sp|O15446-2|RPA34_HUMAN	13737109	3759142	4563743	5590645	1.77212e+06	7429673	0	FALSE
+56.063SLGTGAPVIESPYGETISPEDAPESISK+56.063	tr|A0A0A0MT56|A0A0A0MT56_HUMAN;tr|E9PID8|E9PID8_HUMAN;tr|E7EWR4|E7EWR4_HUMAN;sp|P33240|CSTF2_HUMAN;sp|P33240-2|CSTF2_HUMAN	47734992	26710032	5954522	22891160	6074324	15717537	0	FALSE
+56.063VLDNYLTSPLPEEVDETSAEDEGVSQR	sp|O00299|CLIC1_HUMAN	91060152	49507744	11691852	48300744	9839399	22925886	0	FALSE
+56.063AALETDENLLLC+57.021APTGAGK+56.063	sp|O75643|U520_HUMAN;sp|O75643-2|U520_HUMAN	22774468	12478780	1.16508e+06	11694625	3.825e+06	5427564	0	FALSE
+56.063AVTPPM+15.995PLLTPATPGGLPPAAAVAAAAATAK+56.063	tr|A0A0J9YXJ8|A0A0J9YXJ8_HUMAN;tr|E9PQ56|E9PQ56_HUMAN;tr|A0A0J9YWM1|A0A0J9YWM1_HUMAN;tr|H0YEM1|H0YEM1_HUMAN;tr|A0A0J9YVR6|A0A0J9YVR6_HUMAN;tr|A0A0J9YXX5|A0A0J9YXX5_HUMAN;tr|A0A0J9YYL3|A0A0J9YYL3_HUMAN;tr|A0A0J9YVP6|A0A0J9YVP6_HUMAN;tr|H0YCP8|H0YCP8_HUMAN;sp|Q9UHX1|PUF60_HUMAN;sp|Q9UHX1-2|PUF60_HUMAN;sp|Q9UHX1-3|PUF60_HUMAN;sp|Q9UHX1-4|PUF60_HUMAN;sp|Q9UHX1-5|PUF60_HUMAN;sp|Q9UHX1-6|PUF60_HUMAN	5.88557e+06	3.10708e+06	477117	2.28476e+06	570790	1.37779e+06	0	FALSE
+56.063DLYANTVLSGGTTMYPGIADR	tr|A0A2R8Y793|A0A2R8Y793_HUMAN;sp|P63261|ACTG_HUMAN;sp|P60709|ACTB_HUMAN	23734824	12406083	3.05338e+06	12391057	2.50347e+06	5.79671e+06	0	FALSE
+56.063VYAPASTLVDQPYANEGTVVVTER	sp|Q14126|DSG2_HUMAN	41006672	16499348	3360911	17252262	3.43829e+06	9152633	0	FALSE
+56.063SQETEC+57.021TYFSTPLLLGK+56.063	tr|G3XAL0|G3XAL0_HUMAN;sp|P40926|MDHM_HUMAN;sp|P40926-2|MDHM_HUMAN	37758956	19917144	2263303	20040194	3.85564e+06	11205667	0	FALSE
+56.063TFVNITPAEVGVLVGK+56.063DR	tr|I3L3D5|I3L3D5_HUMAN;sp|P07737|PROF1_HUMAN	7.92485e+06	3.98081e+06	387100	4188537	738478	1.46646e+06	0	FALSE
+56.063LIGPNC+57.021PGVINPGEC+57.021K+56.063	sp|P53597|SUCA_HUMAN	30961922	15396317	1.9721e+06	14845377	5090089	6.42666e+06	0	FALSE
+56.063QAVLGAGLPISTPC+57.021TTINK+56.063	tr|E9PKF3|E9PKF3_HUMAN;tr|H0YEL7|H0YEL7_HUMAN;sp|P24752|THIL_HUMAN;sp|P24752-2|THIL_HUMAN	14108877	6.41699e+06	524259	6259917	865545	3582570	0	FALSE
+56.063IFQNAPTDPTQDFSTQVAK+56.063	sp|P45974|UBP5_HUMAN;sp|P45974-2|UBP5_HUMAN	182444704	70634536	12418626	82528192	18350216	34199164	0	FALSE
+56.063LLEDGEDFNLGDALDSSNSM+15.995QTIQK+56.063	sp|P05783|K1C18_HUMAN	15462981	8251976	2.17358e+06	8241586	1.96981e+06	5084241	0	FALSE
+56.063SVSPSPVPLLFQPDQNAPPIR	sp|Q02241-2|KIF23_HUMAN;sp|Q02241-3|KIF23_HUMAN	4535965	2.51926e+06	244241	2.27841e+06	350082	750574	0	FALSE
+56.063GVPAGNSDTEGGQPGR	tr|E7EQT4|E7EQT4_HUMAN;tr|S4R3H4|S4R3H4_HUMAN;tr|G3V3B0|G3V3B0_HUMAN;tr|G3V3T3|G3V3T3_HUMAN;sp|Q9UKV3|ACINU_HUMAN;sp|Q9UKV3-2|ACINU_HUMAN;sp|Q9UKV3-3|ACINU_HUMAN;sp|Q9UKV3-5|ACINU_HUMAN	4376157	2.09811e+06	268220	2.27385e+06	508514	857375	0	FALSE
+56.063EC+57.021VLPGGETAGDMGK+56.063	tr|A0A2R8Y7S8|A0A2R8Y7S8_HUMAN;tr|A0A2R8YFH0|A0A2R8YFH0_HUMAN;tr|A0A2R8YG02|A0A2R8YG02_HUMAN;tr|E9PHA6|E9PHA6_HUMAN;tr|A0A2R8Y6P0|A0A2R8Y6P0_HUMAN;sp|P43246|MSH2_HUMAN;sp|P43246-2|MSH2_HUMAN	21573538	15185683	3.01368e+06	11510373	3.95912e+06	6168718	0	FALSE
+56.063GLSGAQDPFPGPAPVPVEVVQK+56.063	tr|A0A140T9L0|A0A140T9L0_HUMAN;tr|A0A0G2JJL1|A0A0G2JJL1_HUMAN	5.49786e+06	2.99335e+06	0	1.95055e+06	594419	439401	0	FALSE
+56.063M+15.995SVQPTVSLGGFEITPPVVLR	tr|E5RI98|E5RI98_HUMAN;sp|P06748|NPM_HUMAN;sp|P06748-2|NPM_HUMAN;sp|P06748-3|NPM_HUMAN	68317784	35642328	5.03313e+06	35319872	9266820	19370986	0	FALSE
+56.063GSQAQPDSPSAQLALIAASQSFLQPGGK+56.063	sp|Q9Y490|TLN1_HUMAN	4.66266e+06	2.52457e+06	605088	2.11877e+06	750482	717966	0	FALSE
+56.063VLDNYLTSPLPEEVDETSAEDEGVSQR	sp|O00299|CLIC1_HUMAN	26013448	15163669	2.47634e+06	14866294	2.48815e+06	6.50355e+06	0	FALSE
+56.063LASEEPPDDEEALATIR	tr|B1AHE4|B1AHE4_HUMAN;sp|Q9UBB4|ATX10_HUMAN;sp|Q9UBB4-2|ATX10_HUMAN	14313832	7653679	1.85537e+06	6267785	1.52507e+06	4.11193e+06	0	FALSE
+56.063SVSTPSEAGSQDSGDGAVGSR	tr|E7ESD3|E7ESD3_HUMAN;tr|E9PGG1|E9PGG1_HUMAN;tr|E7EUM4|E7EUM4_HUMAN;tr|E7ET01|E7ET01_HUMAN;tr|E7EQL5|E7EQL5_HUMAN;tr|E7ERR6|E7ERR6_HUMAN;tr|E7EQU2|E7EQU2_HUMAN;tr|E7ERH4|E7ERH4_HUMAN;tr|E7EMU4|E7EMU4_HUMAN;tr|E7ETL8|E7ETL8_HUMAN;tr|E7EV09|E7EV09_HUMAN;sp|Q13409|DC1I2_HUMAN;sp|Q13409-2|DC1I2_HUMAN;sp|Q13409-3|DC1I2_HUMAN;sp|Q13409-5|DC1I2_HUMAN;sp|Q13409-6|DC1I2_HUMAN;sp|Q13409-7|DC1I2_HUMAN	10445282	5.85088e+06	415559	5573186	1.00621e+06	1.27266e+06	0	FALSE
+56.063DLYANTVLSGGTTMYPGIADR	tr|A0A2R8Y793|A0A2R8Y793_HUMAN;sp|P63261|ACTG_HUMAN;sp|P60709|ACTB_HUMAN	108099248	88756248	25819632	47133596	7.51902e+06	22664552	0	FALSE
+56.063NAVTQEFGPVPDTAR	tr|A2A274|A2A274_HUMAN;sp|Q99798|ACON_HUMAN	46824364	25737802	2.1014e+06	25932260	6170258	15721700	0	FALSE
+56.063SSSVGSSSSYPISPAVSR	tr|H0YDN1|H0YDN1_HUMAN;sp|Q15149|PLEC_HUMAN;sp|Q15149-2|PLEC_HUMAN;sp|Q15149-3|PLEC_HUMAN;sp|Q15149-4|PLEC_HUMAN;sp|Q15149-5|PLEC_HUMAN;sp|Q15149-6|PLEC_HUMAN;sp|Q15149-7|PLEC_HUMAN;sp|Q15149-8|PLEC_HUMAN;sp|Q15149-9|PLEC_HUMAN	25430510	13141948	2.09246e+06	14041891	18877902	0	0.000969982	FALSE
+56.063LVYLVENPGGYVAYSK+56.063	tr|G3V0E5|G3V0E5_HUMAN;sp|P02786|TFR1_HUMAN	69255536	41451064	8889299	31123346	6.92173e+06	18040318	0	FALSE
+56.063TYDPSGDSTLPTC+57.021SK+56.063	sp|Q9Y2X3|NOP58_HUMAN	114244024	59943936	5287450	66868456	12116316	33516864	0	FALSE
+56.063IPSAVGYQPTLATDM+15.995GTM+15.995QER	tr|F8W0P7|F8W0P7_HUMAN;tr|F8W079|F8W079_HUMAN;tr|H0YH81|H0YH81_HUMAN;tr|H0YI37|H0YI37_HUMAN;sp|P06576|ATPB_HUMAN	119745848	62685344	7.93966e+06	54387028	33256338	32633114	0	FALSE
+56.063AAAYSAQVQPVDGATR	tr|A0A3B3IRR6|A0A3B3IRR6_HUMAN;tr|A0A3B3ITA3|A0A3B3ITA3_HUMAN;tr|A0A3B3IT54|A0A3B3IT54_HUMAN;sp|Q9H7E9|CH033_HUMAN;sp|Q9H7E9-2|CH033_HUMAN	70982408	36053960	4.25616e+06	34259148	6799155	14886192	0	FALSE
+56.063LSGTVGVAAVTAGPGLTNTVTAVK+56.063	tr|E9PJS0|E9PJS0_HUMAN;tr|M0R026|M0R026_HUMAN;tr|M0R1B5|M0R1B5_HUMAN;tr|E9PL44|E9PL44_HUMAN;sp|A1L0T0|ILVBL_HUMAN	17463534	6.71999e+06	949676	7.41554e+06	1.91815e+06	5241664	0	FALSE
+56.063SPYTVTVGQAC+57.021NPSAC+57.021R	tr|Q60FE5|Q60FE5_HUMAN;tr|F8WE98|F8WE98_HUMAN;tr|A0A087WWY3|A0A087WWY3_HUMAN;sp|P21333|FLNA_HUMAN;sp|P21333-2|FLNA_HUMAN	47891136	24625652	2.07748e+06	27374962	5.11304e+06	9686467	0	FALSE
+56.063FGIVTSSAGTGTTEDTEAK+56.063	tr|H0YHG0|H0YHG0_HUMAN;sp|P82979|SARNP_HUMAN	57467528	35816432	5685054	35245240	8023382	17937058	0	FALSE
+56.063ALPAVQQNNLDEDLIR	sp|P22314|UBA1_HUMAN;sp|P22314-2|UBA1_HUMAN	30065732	16362995	6.44215e+06	18587886	5.62822e+06	5953737	0	FALSE
+56.063AAAASAAEAGIATTGTEDSDDALLK+56.063	tr|H0Y3Y9|H0Y3Y9_HUMAN;sp|P55036|PSMD4_HUMAN	54264372	29392422	3.7519e+06	26431514	2.07407e+06	10256158	0	FALSE
+56.063DLYANTVLSGGTTM+15.995YPGIADR	tr|A0A2R8Y793|A0A2R8Y793_HUMAN;sp|P63261|ACTG_HUMAN;sp|P60709|ACTB_HUMAN	32276846	29558344	3.24626e+06	19312112	3018191	15068771	0.000969982	FALSE
+56.063DAAASASTPAQAPTSDSPVAEDASR	tr|H3BRW3|H3BRW3_HUMAN;tr|H3BRD2|H3BRD2_HUMAN;sp|P55789|ALR_HUMAN	5.50013e+06	2225295	477636	2.4057e+06	418943	1.02753e+06	0	FALSE
+56.063GQC+57.021DLELINVC+57.021NENSLFK+56.063	tr|A0A087WVQ6|A0A087WVQ6_HUMAN;sp|Q00610|CLH1_HUMAN;sp|Q00610-2|CLH1_HUMAN	22726034	11466835	0	12935672	2.04581e+06	5.37816e+06	0	FALSE
+56.063AAEAAAAPAESAAPAAGEEPSK+56.063EEGEPK+56.063	sp|P80723|BASP1_HUMAN	37951336	18188504	7.9136e+06	22768006	4540045	11799742	0.000969982	FALSE
+56.063AAVDAGFVPNDMQVGQTGK+56.063	tr|H0YL12|H0YL12_HUMAN;tr|H0YK49|H0YK49_HUMAN;tr|H0YNX6|H0YNX6_HUMAN;tr|H0YLU7|H0YLU7_HUMAN;sp|P13804|ETFA_HUMAN;sp|P13804-2|ETFA_HUMAN	133692760	67286992	10581217	66418368	18871864	33310806	0	FALSE
+56.063ITLPVDFVTADK+56.063FDENAK+56.063	sp|P00558|PGK1_HUMAN;sp|P00558-2|PGK1_HUMAN	4.18005e+06	2.34416e+06	504421	1.24924e+06	1.02709e+06	635849	0	FALSE
+56.063QTSGGPVDASSEYQQELER	tr|A8MUH2|A8MUH2_HUMAN;sp|P18859|ATP5J_HUMAN;sp|P18859-2|ATP5J_HUMAN	25589150	16170349	55816.1	16680288	3.18034e+06	8.0674e+06	0	FALSE
+56.063QQAIELTQEEPYSDIIATPGPR	tr|E5RG18|E5RG18_HUMAN;tr|E5RFZ5|E5RFZ5_HUMAN;tr|E5RI01|E5RI01_HUMAN;sp|O60216|RAD21_HUMAN	13897683	6671699	874984	6.56905e+06	2380745	3.74722e+06	0	FALSE
+56.063LFVSDGVPGC+57.021LPVLAAAGR	tr|F8VPL7|F8VPL7_HUMAN;tr|F8VZZ9|F8VZZ9_HUMAN;tr|F5H2V6|F5H2V6_HUMAN;tr|F8W0S4|F8W0S4_HUMAN;tr|F8W0M7|F8W0M7_HUMAN;tr|F8VS26|F8VS26_HUMAN;sp|P56192|SYMC_HUMAN;sp|P56192-2|SYMC_HUMAN	4956805	3.55325e+06	690676	3108109	1.1219e+06	1.08657e+06	0	FALSE
+56.063TPVEGAQTSIYLASSPEVEGVSGR	sp|Q9HBH5|RDH14_HUMAN	12631143	7.79714e+06	582058	3187062	1.07592e+06	3.04859e+06	0	FALSE
+56.063LEQQVPVNQVFGQDEMIDVIGVTK+56.063	tr|G5E9G0|G5E9G0_HUMAN;tr|H7C422|H7C422_HUMAN;tr|B5MCW2|B5MCW2_HUMAN;tr|H7C3M2|H7C3M2_HUMAN;sp|P39023|RL3_HUMAN	2.2909e+06	1306025	0	1.27337e+06	0	498060	0	FALSE
+56.063EQFDTLTPEPPVDPNQEVPPGPPR	tr|H0YC33|H0YC33_HUMAN;tr|A0A0B4J210|A0A0B4J210_HUMAN;tr|E5RH50|E5RH50_HUMAN;sp|Q6PKG0|LARP1_HUMAN;sp|Q6PKG0-3|LARP1_HUMAN	61049256	31603856	17860736	14231688	13427757	15062233	0	FALSE
+56.063FQMTQEVVC+57.021DEC+57.021PNVK+56.063	sp|Q9UBS4|DJB11_HUMAN	18751590	8971189	2902052	10027815	1123977	3.70276e+06	0.000969982	FALSE
+56.063QQLSAEELDAQLDAYNAR	tr|E9PB61|E9PB61_HUMAN;sp|Q86V81|THOC4_HUMAN	168829600	88131688	11520306	95602528	19125528	48573068	0	FALSE
+56.063LLQPDFQPVC+57.021ASQLYPR	sp|Q9UJW0|DCTN4_HUMAN;sp|Q9UJW0-2|DCTN4_HUMAN;sp|Q9UJW0-3|DCTN4_HUMAN	10896828	6.04833e+06	2129311	6.0221e+06	1.69129e+06	651674	0	FALSE
+56.063QGAIVAVTGDGVNDSPALK+56.063	tr|H0Y7C1|H0Y7C1_HUMAN;tr|B1AKY9|B1AKY9_HUMAN;tr|M0R116|M0R116_HUMAN;tr|A0A0A0MT26|A0A0A0MT26_HUMAN;tr|A0A2R8YEY8|A0A2R8YEY8_HUMAN;sp|P13637|AT1A3_HUMAN;sp|P13637-2|AT1A3_HUMAN;sp|P13637-3|AT1A3_HUMAN;sp|P05023|AT1A1_HUMAN;sp|P05023-3|AT1A1_HUMAN;sp|P05023-4|AT1A1_HUMAN;sp|P50993|AT1A2_HUMAN	187225712	119997088	4433730	92414352	30295178	42238428	0.000969982	FALSE
+56.063GQAAVQQLQAEGLSPR	tr|E9PQ63|E9PQ63_HUMAN;tr|A8MTM1|A8MTM1_HUMAN;sp|P16152|CBR1_HUMAN;sp|P16152-2|CBR1_HUMAN;sp|O75828|CBR3_HUMAN	38287820	19724560	2.62665e+06	17540010	4.54477e+06	8009353	0	FALSE
+56.063ALIVVPYAEGVIPDEAK+56.063	tr|Q5T760|Q5T760_HUMAN;sp|Q05519|SRS11_HUMAN;sp|Q05519-2|SRS11_HUMAN	27612018	14208104	1457602	12945763	2.3814e+06	6630853	0	FALSE
+56.063DLYANTVLSGGTTM+15.995YPGIADR	tr|A0A2R8Y793|A0A2R8Y793_HUMAN;sp|P63261|ACTG_HUMAN;sp|P60709|ACTB_HUMAN	225342720	110122648	25087416	120281104	23213216	72422224	0	FALSE
+56.063TGAPQYGSYGTAPVNLNIK+56.063	tr|A0A0B4J203|A0A0B4J203_HUMAN;sp|Q6UN15|FIP1_HUMAN;sp|Q6UN15-3|FIP1_HUMAN;sp|Q6UN15-4|FIP1_HUMAN;sp|Q6UN15-5|FIP1_HUMAN	39751888	20832230	3047280	21076246	2.77765e+06	14368065	0	FALSE
+56.063EAAGTTAAAGTGGATEQPPR	tr|E9PQI8|E9PQI8_HUMAN;sp|O43290|SNUT1_HUMAN	1913753	959425	57155.9	1.00922e+06	111649	402339	0	FALSE
+56.063GSVGAVPSGTSPGGVATTAAAGSR	sp|Q6ZNB6|NFXL1_HUMAN;sp|Q6ZNB6-2|NFXL1_HUMAN	7.17748e+06	2.83033e+06	1.08997e+06	1.67412e+06	164602	576100	0	FALSE
+56.063TSAC+57.021FEPSLDYMVTK+56.063	sp|P31327|CPSM_HUMAN;sp|P31327-2|CPSM_HUMAN;sp|P31327-3|CPSM_HUMAN	48193552	26993282	2811014	26872608	13119793	16960890	0	FALSE
+56.063FMQTFVLAPEGSVANK+56.063	tr|E5RIZ6|E5RIZ6_HUMAN;sp|Q13283|G3BP1_HUMAN	4.11696e+06	1.54621e+06	671561	1401066	934484	937441	0	FALSE
+56.063AIAELGIYPAVDPLDSTSR	tr|H0YH81|H0YH81_HUMAN;sp|P06576|ATPB_HUMAN	181359808	95323008	11020283	100103872	20899356	54540828	0	FALSE
+56.063LLEGDGGPNTGGM+15.995GAYC+57.021PAPQVSNDLLLK+56.063	tr|F8WD69|F8WD69_HUMAN;sp|P22102|PUR2_HUMAN;sp|P22102-2|PUR2_HUMAN	19711794	11489037	3030010	8215497	3.85389e+06	3110722	0	FALSE
+56.063NQDLAPNSAEQASILSLVTK+56.063	tr|A0A0A0MRL0|A0A0A0MRL0_HUMAN;tr|X6R6Z1|X6R6Z1_HUMAN;tr|B4DY09|B4DY09_HUMAN;sp|Q12905|ILF2_HUMAN	223859088	123976408	13676523	115834976	24891006	60991052	0	FALSE
+56.063TEPTAQQNLALQLAEK+56.063	sp|Q99613|EIF3C_HUMAN;sp|Q99613-2|EIF3C_HUMAN;sp|B5ME19|EIFCL_HUMAN	118146496	71281192	5999661	74194728	12263047	34511148	0	FALSE
+56.063LLEDGEDFNLGDALDSSNSM+15.995QTIQK+56.063	sp|P05783|K1C18_HUMAN	14725545	7858846	1.73315e+06	7.53153e+06	1.64295e+06	4318988	0	FALSE
+56.063EAQQALGSAAADATEAK+56.063	sp|P11047|LAMC1_HUMAN	7.83099e+06	3.29758e+06	138379	3.63084e+06	267164	670030	0	FALSE
+56.063TSVQTEDDQLIAGQSAR	tr|G3XAM7|G3XAM7_HUMAN;tr|A0A0A0MTJ6|A0A0A0MTJ6_HUMAN;tr|A0A0A0MRI5|A0A0A0MRI5_HUMAN;sp|P35221|CTNA1_HUMAN;sp|P35221-2|CTNA1_HUMAN;sp|P35221-3|CTNA1_HUMAN;sp|P26232|CTNA2_HUMAN;sp|P26232-2|CTNA2_HUMAN;sp|P26232-3|CTNA2_HUMAN;sp|P26232-4|CTNA2_HUMAN;sp|P26232-5|CTNA2_HUMAN;sp|P26232-6|CTNA2_HUMAN	33545122	20227892	1.70918e+06	20011404	3.86865e+06	7.55414e+06	0	FALSE
+56.063LTVVDTPGYGDAINC+57.021R	tr|C9JQJ4|C9JQJ4_HUMAN;tr|C9J938|C9J938_HUMAN;tr|B5MD47|B5MD47_HUMAN;tr|B5MCX3|B5MCX3_HUMAN;tr|C9JB25|C9JB25_HUMAN;tr|H7C310|H7C310_HUMAN;tr|C9IZU3|C9IZU3_HUMAN;tr|C9J2Q4|C9J2Q4_HUMAN;tr|C9IY94|C9IY94_HUMAN;sp|Q15019|SEPT2_HUMAN;sp|Q15019-2|SEPT2_HUMAN;sp|Q15019-3|SEPT2_HUMAN	9217024	3.57029e+06	122206	4.52055e+06	2.33293e+06	1.65039e+06	0	FALSE
+56.063GPFVEAEVPDVDLEC+57.021PDAK+56.063	sp|Q09666|AHNK_HUMAN	26694166	12287750	1.8867e+06	11038817	2.67126e+06	4.79249e+06	0.000969982	FALSE
+56.063ILATPPQEDAPSVDIANIR	tr|A0A0B4J1R6|A0A0B4J1R6_HUMAN;tr|E9PFF2|E9PFF2_HUMAN;sp|P29401|TKT_HUMAN;sp|P29401-2|TKT_HUMAN	1398777600	842720896	67709528	860386432	171203760	410500896	0	FALSE
+56.063VTAVC+57.021GVVLPGQLPAPGELGGNR	tr|Q5T795|Q5T795_HUMAN;sp|Q9NU22|MDN1_HUMAN	14688216	7392654	1.11557e+06	7.47058e+06	1.21993e+06	3.50709e+06	0.000969982	FALSE
+56.063EADGSETPEPFAAEAK+56.063	sp|Q7KZF4|SND1_HUMAN	66173588	35023852	9321027	33311176	7031362	14128720	0	FALSE
+56.063VMTIPYQPM+15.995PASSPVIC+57.021AGGQDR	sp|Q15365|PCBP1_HUMAN	21183226	11312507	1851881	10681925	1.66696e+06	5481334	0	FALSE
+56.063VLAPASTLQSSYQIPTENSMTAR	sp|Q14126|DSG2_HUMAN	31812070	15424204	3165727	16291985	2609813	8958664	0	FALSE
+56.063GC+57.021ITIIGGGDTATC+57.021C+57.021AK+56.063	sp|P00558|PGK1_HUMAN;sp|P00558-2|PGK1_HUMAN	307877600	156171792	20034030	187353280	36393080	60309640	0	FALSE
+56.063ETESQLLPDVGAIVTC+57.021K+56.063	tr|R4GNH9|R4GNH9_HUMAN;tr|R4GMQ7|R4GMQ7_HUMAN;tr|B1AMU7|B1AMU7_HUMAN;tr|B1AMU4|B1AMU4_HUMAN;sp|Q9Y3B2|EXOS1_HUMAN	6.69505e+06	4.13258e+06	1.22724e+06	3.39224e+06	911385	2.14277e+06	0	FALSE
+56.063TTSSANNPNLM+15.995YQDEC+57.021DR	tr|A0A1X7SBZ2|A0A1X7SBZ2_HUMAN;tr|A0A1W2PQ51|A0A1W2PQ51_HUMAN;sp|Q92841|DDX17_HUMAN;sp|Q92841-1|DDX17_HUMAN;sp|Q92841-2|DDX17_HUMAN;sp|Q92841-3|DDX17_HUMAN	6.95782e+06	4.12676e+06	0	4013090	1.6098e+06	2.07069e+06	0.000969982	FALSE
+56.063LFVYDPNNPPSSEVLR	tr|A0A0J9YYG4|A0A0J9YYG4_HUMAN;tr|J3QT77|J3QT77_HUMAN;tr|A0A0J9YXF2|A0A0J9YXF2_HUMAN;sp|Q15165|PON2_HUMAN;sp|Q15165-1|PON2_HUMAN;sp|Q15165-3|PON2_HUMAN	6670185	14126927	0	11303430	1.07735e+06	4336899	0	FALSE
+56.063LLDAPGIVPGPNSEVGTILR	sp|Q9NVN8|GNL3L_HUMAN	3681821	939980	99163.1	1.28292e+06	180808	1777566	0	FALSE
+56.063SSGPTSLFAVTVAPPGAR	tr|A0A1W2PP35|A0A1W2PP35_HUMAN;tr|A0A1W2PPS1|A0A1W2PPS1_HUMAN;tr|A0A1X7SBS1|A0A1X7SBS1_HUMAN;tr|A0A1W2PP22|A0A1W2PP22_HUMAN;sp|Q00839|HNRPU_HUMAN;sp|Q00839-2|HNRPU_HUMAN	297989728	164308912	20052378	180469200	35790336	87801208	0	FALSE
+56.063LVGQGASAVLLDLPNSGGEAQAK+56.063	tr|Q5H928|Q5H928_HUMAN;sp|Q99714|HCD2_HUMAN;sp|Q99714-2|HCD2_HUMAN	56649560	30855218	3130248	30908312	5730489	17346618	0	FALSE
+56.063LVSSPC+57.021C+57.021IVTSTYGWTANM+15.995ER	sp|P08238|HS90B_HUMAN	125628992	62925596	12440899	72705072	13632240	33278596	0	FALSE
+56.063EEFASTC+57.021PDDEEIELAYEQVAK+56.063	sp|O00299|CLIC1_HUMAN	38331764	19961758	2.67016e+06	18601088	4879298	10177634	0	FALSE
+56.063VMTIPYQPM+15.995PASSPVIC+57.021AGGQDR	sp|Q15365|PCBP1_HUMAN	45785460	23512278	3.92167e+06	22517394	2.49478e+06	15307713	0	FALSE
+56.063ASPAGTAGGPGAGAAAGGTGPLAAR	sp|Q12962|TAF10_HUMAN	32262294	17359790	1052154	17874196	2.64691e+06	7.40955e+06	0	FALSE
+56.063GVPVSEAEC+57.021TAMGLR	tr|F6V6Z1|F6V6Z1_HUMAN;sp|Q5VT66|MARC1_HUMAN;sp|Q5VT66-2|MARC1_HUMAN;sp|Q969Z3|MARC2_HUMAN;sp|Q969Z3-2|MARC2_HUMAN	16643582	9745310	2.05889e+06	10576851	5817684	4.13642e+06	0	FALSE
+56.063ASTASPC+57.021NNNINAATAVALQEPR	sp|Q71RC2|LARP4_HUMAN;sp|Q71RC2-3|LARP4_HUMAN;sp|Q71RC2-4|LARP4_HUMAN;sp|Q71RC2-5|LARP4_HUMAN;sp|Q71RC2-6|LARP4_HUMAN	41801144	25998236	4.92687e+06	24101464	7.52914e+06	9417880	0.000969982	FALSE
+56.063GQEEISGALPVASPASSR	tr|H0Y8S9|H0Y8S9_HUMAN;tr|H0Y9D5|H0Y9D5_HUMAN;sp|Q9UBK8|MTRR_HUMAN;sp|Q9UBK8-1|MTRR_HUMAN	15946302	6699677	6.80646e+06	7.19906e+06	1.8566e+06	7.52567e+06	0	FALSE
+56.063IGPYQPNVPVGIDYVIPK+56.063	tr|A8MXP9|A8MXP9_HUMAN;tr|A0A0R4J2E8|A0A0R4J2E8_HUMAN;tr|B3KM87|B3KM87_HUMAN;tr|Q68E03|Q68E03_HUMAN;sp|P43243|MATR3_HUMAN;sp|P43243-2|MATR3_HUMAN	183919072	102151208	8927171	95634472	12338274	49960272	0	FALSE
+56.063SVAPAAPTSC+57.021DFSPGDLVWAK+56.063	tr|A0A087WWJ1|A0A087WWJ1_HUMAN;tr|F8WAX8|F8WAX8_HUMAN;sp|P52701|MSH6_HUMAN;sp|P52701-2|MSH6_HUMAN	4.69173e+06	2.71351e+06	991797	3.69944e+06	2750242	661731	0	FALSE
+56.063VYAPASTLVDQPYANEGTVVVTER	sp|Q14126|DSG2_HUMAN	36715672	17279912	2.99438e+06	18103492	3251744	7381605	0	FALSE
+56.063AQVPGSSPGLLSLSLNQQPAAPEC+57.021K+56.063	sp|Q86W42|THOC6_HUMAN;sp|Q86W42-2|THOC6_HUMAN	23264134	10706304	1.24224e+06	10814516	3680893	9198324	0	FALSE
+56.063LC+57.021YVALDFEQEM+15.995ATAASSSSLEK+56.063	tr|I3L4N8|I3L4N8_HUMAN;tr|A0A2R8Y793|A0A2R8Y793_HUMAN;tr|A0A2R8YEA7|A0A2R8YEA7_HUMAN;sp|P63261|ACTG_HUMAN;sp|P60709|ACTB_HUMAN;sp|Q6S8J3|POTEE_HUMAN	34162676	20147026	6162895	18908800	11689099	12539474	0	FALSE
+56.063ALTVPELTQQM+15.995FDAK+56.063	tr|A0A0B4J269|A0A0B4J269_HUMAN;sp|P04350|TBB4A_HUMAN;sp|Q13509|TBB3_HUMAN;sp|Q13509-2|TBB3_HUMAN;sp|P68371|TBB4B_HUMAN	11279083	3.9563e+06	1.6982e+06	4.22297e+06	547906	3.04891e+06	0	FALSE
+56.063ELAQQVQQVAAEYC+57.021R	tr|J3KTA4|J3KTA4_HUMAN;tr|J3KRZ1|J3KRZ1_HUMAN;tr|J3QRQ7|J3QRQ7_HUMAN;sp|P17844|DDX5_HUMAN;sp|P17844-2|DDX5_HUMAN	105743280	53453984	6.43936e+06	55930164	11157391	27036280	0	FALSE
+56.063LLEDGEDFNLGDALDSSNSMQTIQK+56.063	sp|P05783|K1C18_HUMAN	4222097	2701428	0	3.15467e+06	0	1.80402e+06	0	FALSE
+56.063LC+57.021YVALDFEQEM+15.995ATAASSSSLEK+56.063	tr|I3L4N8|I3L4N8_HUMAN;tr|A0A2R8Y793|A0A2R8Y793_HUMAN;tr|A0A2R8YEA7|A0A2R8YEA7_HUMAN;sp|P63261|ACTG_HUMAN;sp|P60709|ACTB_HUMAN;sp|Q6S8J3|POTEE_HUMAN	8.06069e+06	4.59776e+06	3.61852e+06	3.96361e+06	1.75657e+06	5710773	0	FALSE
+56.063AASADSTTEGTPADGFTVLSTK+56.063	sp|O75367|H2AY_HUMAN;sp|O75367-2|H2AY_HUMAN;sp|O75367-3|H2AY_HUMAN	13637407	5.33875e+06	4.54218e+06	7177619	491501	3.59309e+06	0.000969982	FALSE
+56.063EVIAVSC+57.021GPAQC+57.021QETIR	sp|P38117|ETFB_HUMAN;sp|P38117-2|ETFB_HUMAN	58095940	29422772	5.10194e+06	29346142	5313648	25241554	0	FALSE
+56.063NFILDQTNVSAAAQR	tr|A0A1W2PQL0|A0A1W2PQL0_HUMAN;tr|A0A1W2PQD4|A0A1W2PQD4_HUMAN;tr|A0A1W2PP34|A0A1W2PP34_HUMAN;tr|Q5RI18|Q5RI18_HUMAN;tr|A0A1W2PQ74|A0A1W2PQ74_HUMAN;tr|A0A1W2PPH7|A0A1W2PPH7_HUMAN;tr|A0A1W2PP35|A0A1W2PP35_HUMAN;tr|A0A1W2PPL4|A0A1W2PPL4_HUMAN;tr|A0A1W2PPS1|A0A1W2PPS1_HUMAN;tr|A0A1X7SBS1|A0A1X7SBS1_HUMAN;tr|A0A1W2PRZ7|A0A1W2PRZ7_HUMAN;sp|Q00839|HNRPU_HUMAN;sp|Q00839-2|HNRPU_HUMAN	30354740	28311664	14365001	16020323	5.10317e+06	17987216	0	FALSE
+56.063AGPESDAQYQFTGIK+56.063	sp|Q96IX5|USMG5_HUMAN	11523971	4.27343e+06	1.99492e+06	4227529	4.263e+06	7.59466e+06	0	FALSE
+56.063VAYIPDEMAAQQNPLQQPR	sp|O00425|IF2B3_HUMAN	52048248	31316544	2748389	25020644	5817603	8458705	0	FALSE
+56.063ATQFTGATGAIMTTETTK+56.063	sp|Q14126|DSG2_HUMAN	19399462	9118909	2.27392e+06	10021603	4608369	2.71325e+06	0	FALSE
+56.063EM+15.995EENFAVEAANYQDTIGR	tr|B0YJC4|B0YJC4_HUMAN;tr|B0YJC5|B0YJC5_HUMAN;sp|P08670|VIME_HUMAN	42326416	21663968	2.73234e+06	22723672	6.77316e+06	18816298	0.000969982	FALSE
+56.063AAAASAAEAGIATTGTEDSDDALLK+56.063	tr|H0Y3Y9|H0Y3Y9_HUMAN;sp|P55036|PSMD4_HUMAN	55251388	29435566	4.51459e+06	29153372	2.83845e+06	10245464	0	FALSE
+56.063ISNSATYSGSVAPANSALGQTQPSDQDTLVQR	tr|A0A0A0MSP3|A0A0A0MSP3_HUMAN;tr|H0Y8Y3|H0Y8Y3_HUMAN;sp|Q96HC4|PDLI5_HUMAN;sp|Q96HC4-4|PDLI5_HUMAN;sp|Q96HC4-6|PDLI5_HUMAN;sp|Q96HC4-7|PDLI5_HUMAN	14545169	5566199	4.27864e+06	5.08725e+06	5.405e+06	4.94942e+06	0.000969982	FALSE
+56.063ESEPAPASVTALTDAR	tr|E9PMQ6|E9PMQ6_HUMAN;sp|Q00613|HSF1_HUMAN;sp|Q00613-2|HSF1_HUMAN	23276528	11008131	1.77461e+06	12866070	2.04118e+06	6.56231e+06	0	FALSE
+56.063SSLQYSSPAPDGC+57.021GDQTLGDLLLTPTR	sp|P22102|PUR2_HUMAN	9834255	5515816	452384	5.93887e+06	836596	2.90054e+06	0	FALSE
+56.063YLLSQSSPAPLTAAEEELR	tr|F8VS81|F8VS81_HUMAN;sp|Q12792|TWF1_HUMAN;sp|Q12792-3|TWF1_HUMAN;sp|Q12792-4|TWF1_HUMAN	11133498	5952916	659264	6281923	686438	2.76054e+06	0	FALSE
+56.063ASTASPC+57.021NNNINAATAVALQEPR	sp|Q71RC2|LARP4_HUMAN;sp|Q71RC2-3|LARP4_HUMAN;sp|Q71RC2-4|LARP4_HUMAN;sp|Q71RC2-5|LARP4_HUMAN;sp|Q71RC2-6|LARP4_HUMAN	33588972	32679558	0	19340040	9589316	9205826	0.000969982	FALSE
+56.063NALFPEVFSPTPDENSDQNSR	sp|Q8IVT2|MISP_HUMAN	1.7972e+06	821089	454438	811159	393089	649525	0	FALSE
+56.063TDDYLDQPC+57.021YETINR	tr|Q5SX87|Q5SX87_HUMAN;tr|Q5SX91|Q5SX91_HUMAN;sp|P50395|GDIB_HUMAN;sp|P50395-2|GDIB_HUMAN	77382048	38992064	5.22211e+06	42474156	7.14628e+06	16272831	0	FALSE
+56.063GLSGAQDPFPGPAPVPVEVVQK+56.063	tr|A0A140T9L0|A0A140T9L0_HUMAN;tr|A0A0G2JJL1|A0A0G2JJL1_HUMAN	71855384	36775716	3.73165e+06	36300588	6.46457e+06	17283330	0	FALSE
+56.063QSEPAAPPLEVSEEQVAR	tr|X6R5E5|X6R5E5_HUMAN;sp|Q8NBM4|UBAC2_HUMAN;sp|Q8NBM4-2|UBAC2_HUMAN;sp|Q8NBM4-3|UBAC2_HUMAN;sp|Q8NBM4-4|UBAC2_HUMAN	7274993	7070217	3.49078e+06	2.79988e+06	889475	354018	0	FALSE
+56.063SC+57.021MLTGTPESVQSAK+56.063	tr|C9JSZ1|C9JSZ1_HUMAN;tr|E9PEB5|E9PEB5_HUMAN;sp|Q96AE4|FUBP1_HUMAN;sp|Q96AE4-2|FUBP1_HUMAN	28050874	12587357	390890	13975354	2.17327e+06	4296687	0	FALSE
+56.063NTTQNTGYSSGTQNANYPVR	sp|Q12965|MYO1E_HUMAN	21322150	11729037	1.15127e+06	13214910	2.51431e+06	4318029	0	FALSE
+56.063ILDSFAAAPVPTTTLVLK+56.063	sp|P18583|SON_HUMAN;sp|P18583-2|SON_HUMAN;sp|P18583-3|SON_HUMAN;sp|P18583-4|SON_HUMAN;sp|P18583-5|SON_HUMAN;sp|P18583-6|SON_HUMAN;sp|P18583-7|SON_HUMAN;sp|P18583-8|SON_HUMAN;sp|P18583-9|SON_HUMAN;sp|P18583-10|SON_HUMAN	56681512	29036928	3.3418e+06	29934644	5.26513e+06	15940600	0	FALSE
+56.063TSGVVTSC+57.021TGVLPQLSMVK+56.063	tr|H0Y8E6|H0Y8E6_HUMAN;sp|P49736|MCM2_HUMAN	40337000	27672936	2.42872e+06	24641050	5.07256e+06	9565616	0	FALSE
+56.063GQSPAGDGSPEPPTPR	tr|A0A0A0MRW6|A0A0A0MRW6_HUMAN;sp|Q9H6R4|NOL6_HUMAN;sp|Q9H6R4-2|NOL6_HUMAN;sp|Q9H6R4-3|NOL6_HUMAN;sp|Q9H6R4-4|NOL6_HUMAN	48161736	24002762	5.18979e+06	29088258	6.64155e+06	15145000	0	FALSE
+56.063LVSSPC+57.021C+57.021IVTSTYGWTANMER	sp|P08238|HS90B_HUMAN	34972476	36763764	1432409	31496692	4.36837e+06	10370239	0	FALSE
+56.063SADGSAPAGEGEGVTLQR	sp|Q01650|LAT1_HUMAN	250541040	134554672	17193498	135748336	30078584	73130416	0	FALSE
+56.063GSLAEAVGSPPPAATPTPTPPTR	sp|Q9Y6I3|EPN1_HUMAN;sp|Q9Y6I3-1|EPN1_HUMAN;sp|Q9Y6I3-3|EPN1_HUMAN	28628084	18682596	37106.2	14299445	2.01607e+06	8634466	0.000969982	FALSE
+56.063NTDQASM+15.995PDNTAAQK+56.063	sp|P35749|MYH11_HUMAN;sp|P35749-2|MYH11_HUMAN;sp|P35749-3|MYH11_HUMAN;sp|P35749-4|MYH11_HUMAN;sp|P35579|MYH9_HUMAN;sp|P35579-2|MYH9_HUMAN	5.57614e+06	7.31367e+06	2.79438e+06	3.65831e+06	0	321248	0	FALSE
+56.063AAVPSGASTGIYEALELR	tr|E5RI09|E5RI09_HUMAN;tr|K7ERS8|K7ERS8_HUMAN;tr|K7EM90|K7EM90_HUMAN;tr|A0A2R8Y798|A0A2R8Y798_HUMAN;tr|A0A2R8YEG5|A0A2R8YEG5_HUMAN;tr|A0A2R8Y879|A0A2R8Y879_HUMAN;tr|A0A2R8Y6G6|A0A2R8Y6G6_HUMAN;tr|E5RGZ4|E5RGZ4_HUMAN;tr|A0A2R8YEM5|A0A2R8YEM5_HUMAN;tr|E5RG95|E5RG95_HUMAN;tr|K7EKN2|K7EKN2_HUMAN;tr|F5H0C8|F5H0C8_HUMAN;tr|K7EPM1|K7EPM1_HUMAN;tr|F5H1C3|F5H1C3_HUMAN;sp|P13929|ENOB_HUMAN;sp|P13929-2|ENOB…	39609164	23093094	2.39321e+06	23691398	4384697	12181050	0	FALSE
+56.063IATSLDGFDVASVQQQR	tr|K7ERZ3|K7ERZ3_HUMAN;sp|O60664|PLIN3_HUMAN;sp|O60664-2|PLIN3_HUMAN;sp|O60664-3|PLIN3_HUMAN;sp|O60664-4|PLIN3_HUMAN	19376418	10402344	100032	9173913	1.18961e+06	3.19725e+06	0	FALSE
+56.063VMTIPYQPM+15.995PASSPVIC+57.021AGGQDR	sp|Q15365|PCBP1_HUMAN	45358880	18232230	1.2362e+06	12074846	1.95583e+06	3.84054e+06	0	FALSE
+56.063TQASSSFQDSSQPAGK+56.063	sp|P46087|NOP2_HUMAN;sp|P46087-2|NOP2_HUMAN;sp|P46087-4|NOP2_HUMAN	36665588	19242382	2.03982e+06	19940258	3.46684e+06	10911210	0	FALSE
+56.063TIAQGNLSNTDVQAAK+56.063	tr|H3BRG4|H3BRG4_HUMAN;sp|P22695|QCR2_HUMAN	156453136	79561080	8904705	79251232	14315238	41587544	0	FALSE
+56.063TTDDTTTDNYIAQGK+56.063	sp|Q7Z2T5|TRM1L_HUMAN	7.35847e+06	4.18048e+06	771461	3.16344e+06	675991	1.67652e+06	0	FALSE
+56.063VTIAQGGVLPNIQAVLLPK+56.063	tr|H0YFX9|H0YFX9_HUMAN;tr|A0A0U1RRH7|A0A0U1RRH7_HUMAN;tr|A0A0U1RR32|A0A0U1RR32_HUMAN;sp|Q9BTM1|H2AJ_HUMAN;sp|P04908|H2A1B_HUMAN;sp|P20671|H2A1D_HUMAN;sp|P0C0S8|H2A1_HUMAN;sp|Q96KK5|H2A1H_HUMAN;sp|Q93077|H2A1C_HUMAN;sp|Q16777|H2A2C_HUMAN;sp|Q99878|H2A1J_HUMAN;sp|Q6FI13|H2A2A_HUMAN;sp|Q7L7L0|H2A3_HUMAN	507883904	266606688	30604584	257963968	50144600	138918736	0	FALSE
+56.063LC+57.021YVALDFEQEM+15.995ATAASSSSLEK+56.063	tr|I3L4N8|I3L4N8_HUMAN;tr|A0A2R8Y793|A0A2R8Y793_HUMAN;tr|A0A2R8YEA7|A0A2R8YEA7_HUMAN;sp|P63261|ACTG_HUMAN;sp|P60709|ACTB_HUMAN;sp|Q6S8J3|POTEE_HUMAN	33278054	21484658	5.04779e+06	18710648	6.93847e+06	10537367	0	FALSE
+56.063TAVDSGIPLLTNFQVTK+56.063	sp|P31327|CPSM_HUMAN;sp|P31327-2|CPSM_HUMAN;sp|P31327-3|CPSM_HUMAN	59453420	31303552	3.4759e+06	32179454	6455249	15302166	0	FALSE
+56.063AIVAIENPADVSVISSR	tr|F8WD59|F8WD59_HUMAN;tr|A0A0C4DG17|A0A0C4DG17_HUMAN;tr|C9J9K3|C9J9K3_HUMAN;sp|P08865|RSSA_HUMAN	224178304	118956992	12488342	125735464	21429426	54108884	0	FALSE
+56.063VTTEIQLPSQSPVEEQSPASLSSLR	tr|F8WD26|F8WD26_HUMAN;tr|A0A0A0MTE2|A0A0A0MTE2_HUMAN;tr|J3KP06|J3KP06_HUMAN;tr|E9PMP7|E9PMP7_HUMAN;tr|E9PMS6|E9PMS6_HUMAN;tr|H0Y424|H0Y424_HUMAN;tr|E9PMT2|E9PMT2_HUMAN;sp|Q8WWI1|LMO7_HUMAN;sp|Q8WWI1-2|LMO7_HUMAN;sp|Q8WWI1-3|LMO7_HUMAN;sp|Q8WWI1-4|LMO7_HUMAN;sp|Q8WWI1-5|LMO7_HUMAN	27762136	12922652	2359151	13935474	2.30088e+06	6439764	0	FALSE
+56.063QVMVVPVGPTC+57.021DEYAQK+56.063	sp|P26639|SYTC_HUMAN;sp|P26639-2|SYTC_HUMAN	76927496	34874712	5484388	35730252	3.89644e+06	9867662	0	FALSE
+56.063VLQAQGSSDPEEESVLYSNR	sp|Q15785|TOM34_HUMAN	51718116	26507022	2.81655e+06	32557928	4604013	9627586	0.000969982	FALSE
+56.063APLATGEDDDDEVPDLVENFDEASK+56.063NEAN	sp|P20290|BTF3_HUMAN;sp|P20290-2|BTF3_HUMAN	49162320	28541856	4964855	21719468	4885298	19170634	0	FALSE
+56.063APTTAAAAAAGVSSTK+56.063	sp|O15479|MAGB2_HUMAN	29853710	17566794	1980052	13920135	3.15961e+06	7.06601e+06	0	FALSE
+56.063C+57.021IPALDSLTPANEDQK+56.063	sp|P10809|CH60_HUMAN	22386038	17835870	5163324	5637473	320505760	202462096	0	FALSE
+56.063LQQGAGLESPQGQPEPGAASPQR	sp|Q9H6F5|CCD86_HUMAN	11130247	5.44067e+06	1.03947e+06	4.64076e+06	1.67777e+06	2.79356e+06	0	FALSE
+56.063VPADTEVVC+57.021APPTAYIDFAR	sp|P60174|TPIS_HUMAN;sp|P60174-1|TPIS_HUMAN	1647849856	876361728	129116184	829491584	166881088	372081120	0	FALSE
+56.063SSSSSSASAAAAAAAASSSASC+57.021SR	sp|Q07065|CKAP4_HUMAN	9464894	5321107	548342	6957004	752628	4653520	0	FALSE
+56.063NTNAGAPPGTAYQSPLPLSR	tr|E9PDF2|E9PDF2_HUMAN;tr|C9J4G7|C9J4G7_HUMAN;tr|A0A0D9SFS3|A0A0D9SFS3_HUMAN;tr|E9PCR7|E9PCR7_HUMAN;sp|Q02218|ODO1_HUMAN;sp|Q02218-2|ODO1_HUMAN;sp|Q02218-3|ODO1_HUMAN	29479860	14509360	1.80641e+06	16046572	2.58769e+06	6.85536e+06	0	FALSE
+56.063IIQGQGVDEPLSETGFK+56.063	sp|Q9NQ88|TIGAR_HUMAN	15285705	8437667	3.46686e+06	7028581	2853854	2.35124e+06	0	FALSE
+56.063IAWPPPTELGSSGSALEEGIK+56.063	tr|F8VS07|F8VS07_HUMAN;tr|F8VQE1|F8VQE1_HUMAN;sp|Q9UHB6|LIMA1_HUMAN;sp|Q9UHB6-2|LIMA1_HUMAN;sp|Q9UHB6-3|LIMA1_HUMAN;sp|Q9UHB6-4|LIMA1_HUMAN;sp|Q9UHB6-5|LIMA1_HUMAN	38845708	24775798	1.93527e+06	21759070	4293333	10212681	0	FALSE
+56.063GSSGGYGSGGAALQPK+56.063	tr|J3QKM5|J3QKM5_HUMAN;sp|Q8TF74|WIPF2_HUMAN	6064474	2488668	134785	2.64275e+06	495202	1.37202e+06	0	FALSE
+56.063SYELPDGQVITIGNER	tr|A0A2R8Y793|A0A2R8Y793_HUMAN;tr|A0A2R8YEA7|A0A2R8YEA7_HUMAN;sp|A5A3E0|POTEF_HUMAN;sp|P63261|ACTG_HUMAN;sp|Q9BYX7|ACTBM_HUMAN;sp|Q562R1|ACTBL_HUMAN;sp|P68133|ACTS_HUMAN;sp|P60709|ACTB_HUMAN;sp|P68032|ACTC_HUMAN;sp|P63267|ACTH_HUMAN;sp|P63267-2|ACTH_HUMAN;sp|P62736|ACTA_HUMAN;sp|Q6S8J3|POTEE_HUMAN	3042390272	1556946048	241014848	1722658816	355827008	806358848	0	FALSE
+56.063GAEPETGSAVSAAQC+57.021QGPTR	tr|A0A087WTA5|A0A087WTA5_HUMAN;sp|Q9UI10-2|EI2BD_HUMAN;sp|Q9UI10-3|EI2BD_HUMAN	7.01759e+06	3.12166e+06	614509	2.16154e+06	691458	1.34597e+06	0	FALSE
+56.063LAEDAPNFDGPAAEGQPGQK+56.063	tr|H0YCH5|H0YCH5_HUMAN;tr|H0YEC5|H0YEC5_HUMAN;tr|H0Y3P2|H0Y3P2_HUMAN;tr|H0YD77|H0YD77_HUMAN;tr|D3DQV9|D3DQV9_HUMAN;sp|P78344|IF4G2_HUMAN;sp|P78344-2|IF4G2_HUMAN	20498958	9047311	1.25945e+06	10028254	2.75725e+06	4521263	0	FALSE
+56.063GYAYVEFENPDEAEK+56.063	tr|H3BV80|H3BV80_HUMAN;tr|H3BMM9|H3BMM9_HUMAN;tr|H3BMS0|H3BMS0_HUMAN;tr|H3BTC0|H3BTC0_HUMAN;tr|H3BPG5|H3BPG5_HUMAN;sp|Q15287|RNPS1_HUMAN;sp|Q15287-2|RNPS1_HUMAN;sp|Q15287-3|RNPS1_HUMAN	20403188	7.19474e+06	1.7413e+06	8.07304e+06	516722	2.79159e+06	0	FALSE
+56.063GTPEQPQC+57.021GFSNAVVQILR	sp|Q86SX6|GLRX5_HUMAN	51758768	47764360	18871614	22110072	7.10843e+06	17771080	0	FALSE
+56.063SYELPDGQVITIGNER	tr|A0A2R8Y793|A0A2R8Y793_HUMAN;tr|A0A2R8YEA7|A0A2R8YEA7_HUMAN;sp|A5A3E0|POTEF_HUMAN;sp|P63261|ACTG_HUMAN;sp|Q9BYX7|ACTBM_HUMAN;sp|Q562R1|ACTBL_HUMAN;sp|P68133|ACTS_HUMAN;sp|P60709|ACTB_HUMAN;sp|P68032|ACTC_HUMAN;sp|P63267|ACTH_HUMAN;sp|P63267-2|ACTH_HUMAN;sp|P62736|ACTA_HUMAN;sp|Q6S8J3|POTEE_HUMAN	2765820672	1789927936	164480112	1630740480	361329824	790048896	0	FALSE
+56.063TYADYESVNEC+57.021MEGVC+57.021K+56.063	tr|G3V279|G3V279_HUMAN;sp|P84090|ERH_HUMAN	222997744	125175952	11830127	130762912	22281338	54982092	0.000969982	FALSE
+56.063NYILDQTNVYGSAQR	tr|B7Z4B8|B7Z4B8_HUMAN;tr|M0R3F1|M0R3F1_HUMAN;tr|A0A0A0MRA5|A0A0A0MRA5_HUMAN;sp|Q9BUJ2|HNRL1_HUMAN;sp|Q9BUJ2-2|HNRL1_HUMAN;sp|Q9BUJ2-3|HNRL1_HUMAN;sp|Q9BUJ2-4|HNRL1_HUMAN	10586824	3.53559e+06	2.50566e+06	3.91081e+06	2.16306e+06	3.05968e+06	0	FALSE
+56.063VSQM+15.995AQYFEPLTLAAVGAASK+56.063	sp|Q9Y490|TLN1_HUMAN	13292488	6.10861e+06	536785	5.01093e+06	1.43653e+06	2.83988e+06	0	FALSE
+56.063SSEM+15.995NVLIPTEGGDFNEFPVPEQFK+56.063	sp|Q01518|CAP1_HUMAN;sp|Q01518-2|CAP1_HUMAN	7233701	4075098	2.53194e+06	3.79641e+06	1108999	1.69167e+06	0	FALSE
+56.063SQNIVTDSSSLSAEAIR	tr|A0A087WUZ3|A0A087WUZ3_HUMAN;sp|Q01082|SPTB2_HUMAN;sp|Q01082-2|SPTB2_HUMAN;sp|Q01082-3|SPTB2_HUMAN	40952340	21558576	6.13314e+06	17290690	3.50182e+06	8044523	0	FALSE
+56.063IGYSSPQTLADQSSK+56.063	sp|O95573|ACSL3_HUMAN	22587412	9073562	213412	10825761	1.47794e+06	6734673	0	FALSE
+56.063DGM+15.995DNQGGYGSVGR	sp|P31942|HNRH3_HUMAN;sp|P31942-2|HNRH3_HUMAN;sp|P31942-3|HNRH3_HUMAN;sp|P31942-4|HNRH3_HUMAN	1544319	841064	310215	800817	11556.4	182832	0	FALSE
+56.063LGLPPLTPEQQEALQK+56.063	tr|A0A0J9YXJ8|A0A0J9YXJ8_HUMAN;tr|E9PQ56|E9PQ56_HUMAN;tr|A0A0J9YWM1|A0A0J9YWM1_HUMAN;tr|H0YEM1|H0YEM1_HUMAN;tr|A0A0J9YVR6|A0A0J9YVR6_HUMAN;tr|A0A0J9YXX5|A0A0J9YXX5_HUMAN;tr|A0A0J9YYL3|A0A0J9YYL3_HUMAN;tr|A0A0J9YVP6|A0A0J9YVP6_HUMAN;tr|E9PL19|E9PL19_HUMAN;tr|E9PN18|E9PN18_HUMAN;tr|E9PMU7|E9PMU7_HUMAN;sp|Q9UHX1|PUF60_HUMAN;sp|Q9UHX1-2|PUF60_HUMAN;sp|Q9UHX1-3|PUF60_HUMAN;sp|Q9UHX1-4|PUF60_HUMAN;sp|Q…	705651712	313705888	39049804	339596800	63744732	181059856	0	FALSE
+56.063LYGSAGPPPTGEEDTAEK+56.063DEL	sp|P11021|BIP_HUMAN	523783936	267902864	31566768	240845488	50354428	138107744	0	FALSE
+56.063FIPLSEPAPVPPIPNEQQLAR	tr|H7C3S9|H7C3S9_HUMAN;tr|E9PGT6|E9PGT6_HUMAN;sp|Q99627|CSN8_HUMAN;sp|Q99627-2|CSN8_HUMAN	9894475	6.20419e+06	463582	5.59491e+06	941082	2.13703e+06	0	FALSE
+56.063VAPEM+15.995FFSPQVFEQPGPSIPR	sp|Q9H568|ACTL8_HUMAN	1.8261e+06	1.97673e+06	0	1.93587e+06	437974	442646	0	FALSE
+56.063VPADTEVVC+57.021APPTAYIDFAR	sp|P60174|TPIS_HUMAN;sp|P60174-1|TPIS_HUMAN	242017536	128060640	15858048	130728808	21181120	57381916	0	FALSE
+56.063FTITPPTAQVVGVLK+56.063	sp|P52907|CAZA1_HUMAN	25210566	12583840	1.3326e+06	13806669	2414339	6529402	0	FALSE
+56.063ESTGAQVQVAGDMLPNSTER	tr|E9PFP8|E9PFP8_HUMAN;tr|F8VZX2|F8VZX2_HUMAN;tr|F8VXH9|F8VXH9_HUMAN;tr|F8W0G4|F8W0G4_HUMAN;tr|J3QT27|J3QT27_HUMAN;tr|H3BRU6|H3BRU6_HUMAN;sp|Q15366|PCBP2_HUMAN;sp|Q15366-2|PCBP2_HUMAN;sp|Q15366-3|PCBP2_HUMAN;sp|Q15366-4|PCBP2_HUMAN;sp|Q15366-5|PCBP2_HUMAN;sp|Q15366-6|PCBP2_HUMAN;sp|Q15366-7|PCBP2_HUMAN;sp|Q15366-8|PCBP2_HUMAN;sp|Q15365|PCBP1_HUMAN;sp|P57721|PCBP3_HUMAN;sp|P57721-2|PCBP3_HUMAN;sp|…	567250944	294831264	29656840	306074688	48641384	119331016	0.000969982	FALSE
+56.063TAVTTVPSMGIGLVK+56.063	sp|Q8WUH6|TM263_HUMAN	11984716	5.97839e+06	1047896	6.33074e+06	4701309	3.02054e+06	0	FALSE
+56.063IVSGC+57.021PLPEAC+57.021ELYYVNR	tr|A0A087WV29|A0A087WV29_HUMAN;sp|Q9H0A0|NAT10_HUMAN;sp|Q9H0A0-2|NAT10_HUMAN	15797329	6.45598e+06	1.17189e+06	7764436	1.46093e+06	6516845	0	FALSE
+56.063ALTVPELTQQMFDAK+56.063	tr|A0A0B4J269|A0A0B4J269_HUMAN;sp|P04350|TBB4A_HUMAN;sp|Q13509|TBB3_HUMAN;sp|Q13509-2|TBB3_HUMAN;sp|P68371|TBB4B_HUMAN	36910164	18148118	1492483	16231036	1.8121e+06	5053571	0	FALSE
+56.063VLALSVETDYTFPLAEK+56.063	tr|F8VWS0|F8VWS0_HUMAN;tr|F8W1K8|F8W1K8_HUMAN;tr|F8VZS0|F8VZS0_HUMAN;tr|F8VW21|F8VW21_HUMAN;sp|P05388|RLA0_HUMAN;sp|P05388-2|RLA0_HUMAN	2.03929e+06	929736	228338	411593	235037	152876	0.000969982	FALSE
+56.063FGQAATMEGIGAIGGTPPAFNR	sp|Q15233|NONO_HUMAN;sp|Q15233-2|NONO_HUMAN	5.89834e+06	4.88049e+06	0	3.17657e+06	492648	1539511	0	FALSE
+56.063ELVSC+57.021SNC+57.021TDYQAR	tr|Q5T5C7|Q5T5C7_HUMAN;sp|P49591|SYSC_HUMAN	6.16078e+06	3.297e+06	234082	4813287	775721	2.43409e+06	0	FALSE
+56.063AGAIAPC+57.021EVTVPAQNTGLGPEK+56.063	tr|G3V210|G3V210_HUMAN;tr|F8VRK7|F8VRK7_HUMAN;tr|F8VPE8|F8VPE8_HUMAN;tr|F8VWS0|F8VWS0_HUMAN;tr|F8VU65|F8VU65_HUMAN;tr|F8VQY6|F8VQY6_HUMAN;tr|F8VW21|F8VW21_HUMAN;sp|P05388|RLA0_HUMAN;sp|P05388-2|RLA0_HUMAN;sp|Q8NHW5|RLA0L_HUMAN	23044520	25091186	5.21693e+06	0	0	0	0	FALSE
+56.063TSTTSSM+15.995VASAEQPR	tr|E7EMN6|E7EMN6_HUMAN;tr|E7EUI7|E7EUI7_HUMAN;sp|Q6NXS1|IPP2B_HUMAN;sp|P41236|IPP2_HUMAN	1.63769e+06	794918	48811.8	896933	155356	390173	0.000969982	FALSE
+56.063INNVPAEGENEVNNELANR	tr|A0A1W2PRQ0|A0A1W2PRQ0_HUMAN;sp|Q9NUQ9|FA49B_HUMAN;sp|Q9NUQ9-2|FA49B_HUMAN	71631232	36681232	4.75546e+06	40992144	7641248	14898644	0.000969982	FALSE
+56.063SSPEPVALTESETEYVIR	sp|Q9Y678|COPG1_HUMAN	31109832	13802050	939429	16896516	4821386	8919534	0	FALSE
+56.063QTYFLPVIGLVDAEK+56.063	tr|E9PM69|E9PM69_HUMAN;tr|E9PKD5|E9PKD5_HUMAN;tr|E9PMD8|E9PMD8_HUMAN;tr|R4GNH3|R4GNH3_HUMAN;tr|E9PLG2|E9PLG2_HUMAN;sp|P17980|PRS6A_HUMAN	1.28627e+06	574449	253725	595609	110694	257497	0	FALSE
+56.063EQTADGVAVIPVLQR	tr|H0YEY4|H0YEY4_HUMAN;tr|A6NFX8|A6NFX8_HUMAN;tr|A6NCQ0|A6NCQ0_HUMAN;tr|A6NJU6|A6NJU6_HUMAN;sp|Q9UKK9|NUDT5_HUMAN	82415104	42319676	4.8283e+06	48098708	13633995	26687970	0	FALSE
+56.063LGGLTQAPGNPVLAVQINQDK+56.063	tr|K7ENG2|K7ENG2_HUMAN;sp|P26368|U2AF2_HUMAN;sp|P26368-2|U2AF2_HUMAN	1.88083e+06	1.05745e+06	1.19911e+06	1.00896e+06	0	1.35122e+06	0	FALSE
+56.063GGGGGGPGEGFDVAK+56.063	sp|Q9Y295|DRG1_HUMAN	9169108	6146198	1.91027e+06	4.44068e+06	1.11835e+06	9629206	0	FALSE
+56.063SYEAQDPEIASLSGK+56.063	tr|U3KQ85|U3KQ85_HUMAN;tr|F5GXW5|F5GXW5_HUMAN;sp|Q99622|C10_HUMAN	19477472	6.20592e+06	5.40337e+06	11137158	2.24075e+06	4842215	0	FALSE
+56.063SAGAPASVSGQDADGSTSPR	tr|K7EQY5|K7EQY5_HUMAN;sp|P42679|MATK_HUMAN;sp|P42679-2|MATK_HUMAN;sp|P42679-3|MATK_HUMAN	3914519	2240652	183725	2.16355e+06	281261	980585	0	FALSE
+56.063NQVAMNPTNTVFDAK+56.063	tr|E9PN25|E9PN25_HUMAN;tr|E9PKE3|E9PKE3_HUMAN;tr|E9PNE6|E9PNE6_HUMAN;tr|E9PQQ4|E9PQQ4_HUMAN;tr|E9PLF4|E9PLF4_HUMAN;tr|E9PPY6|E9PPY6_HUMAN;tr|E9PK54|E9PK54_HUMAN;tr|E9PQK7|E9PQK7_HUMAN;sp|P11142|HSP7C_HUMAN;sp|P11142-2|HSP7C_HUMAN	147161216	161931360	83051888	71464080	81211048	59362212	0	FALSE
+56.063SSSSVTTSETQPC+57.021TPSSSDYSDLQR	tr|K7EM16|K7EM16_HUMAN;sp|P50552|VASP_HUMAN	24635560	11759408	2904177	12210618	2.89088e+06	4.01737e+06	0	FALSE
+56.063AGVAAPATQVAQVTLQSVQR	tr|H0YDN1|H0YDN1_HUMAN;tr|E9PMV1|E9PMV1_HUMAN;sp|Q15149|PLEC_HUMAN;sp|Q15149-2|PLEC_HUMAN;sp|Q15149-3|PLEC_HUMAN;sp|Q15149-4|PLEC_HUMAN;sp|Q15149-5|PLEC_HUMAN;sp|Q15149-6|PLEC_HUMAN;sp|Q15149-7|PLEC_HUMAN;sp|Q15149-8|PLEC_HUMAN;sp|Q15149-9|PLEC_HUMAN	60763904	28781660	3.20414e+06	31322888	5695741	16651241	0.000969982	FALSE
+56.063SALIPPVEETVFYPSPYPIR	tr|C9JNP8|C9JNP8_HUMAN;tr|A0A1W2PP11|A0A1W2PP11_HUMAN;tr|H7C0U0|H7C0U0_HUMAN;tr|A0A1W2PS40|A0A1W2PS40_HUMAN;tr|F8WCQ4|F8WCQ4_HUMAN;sp|Q9H300|PARL_HUMAN;sp|Q9H300-2|PARL_HUMAN	991863	116300	186967	389208	0	197833	0	FALSE
+56.063EGSGNPTPLINPLAGR	tr|F8VV52|F8VV52_HUMAN;tr|F8VP97|F8VP97_HUMAN;tr|F8VQF4|F8VQF4_HUMAN;tr|F8VRS8|F8VRS8_HUMAN;tr|F8W145|F8W145_HUMAN;tr|F8VUB4|F8VUB4_HUMAN;sp|Q9NZN8|CNOT2_HUMAN;sp|Q9NZN8-2|CNOT2_HUMAN;sp|Q9NZN8-4|CNOT2_HUMAN	16762271	9828752	366475	13358790	0	3.02704e+06	0	FALSE
+56.063LC+57.021C+57.021PATAPQEAPAPEGR	tr|M0QXZ5|M0QXZ5_HUMAN;sp|Q96B54|ZN428_HUMAN	10706953	6.22993e+06	627282	6627582	1.4292e+06	1639523	0	FALSE
+56.063EINDC+57.021IGGTVLNISK+56.063	tr|J3QSV6|J3QSV6_HUMAN;sp|O76021|RL1D1_HUMAN	22245270	15413938	1.72009e+06	10810949	2.70893e+06	6543704	0	FALSE
+56.063QITSYGETC+57.021PGLEQYAIK+56.063	sp|P50990|TCPQ_HUMAN;sp|P50990-2|TCPQ_HUMAN;sp|P50990-3|TCPQ_HUMAN	27790798	14052084	4688824	14931375	2.81627e+06	8470310	0	FALSE
+56.063NQLTSNPENTVFDAK+56.063	sp|P11021|BIP_HUMAN	435099072	206268864	19327656	192861472	36864384	106262856	0	FALSE
+56.063FIPLSEPAPVPPIPNEQQLAR	tr|H7C3S9|H7C3S9_HUMAN;tr|E9PGT6|E9PGT6_HUMAN;sp|Q99627|CSN8_HUMAN;sp|Q99627-2|CSN8_HUMAN	175377600	95851376	13620028	94798672	4377487	38661140	0	FALSE
+56.063TLEPIC+57.021DADPSALAK+56.063	tr|A0A087X0H9|A0A087X0H9_HUMAN;sp|Q5T8P6|RBM26_HUMAN;sp|Q5T8P6-2|RBM26_HUMAN;sp|Q5T8P6-3|RBM26_HUMAN;sp|Q5T8P6-6|RBM26_HUMAN	38222988	19498924	4.46062e+06	18955704	4541140	7.07825e+06	0	FALSE
+56.063VMTIPYQPMPASSPVIC+57.021AGGQDR	sp|Q15365|PCBP1_HUMAN	46354748	18785840	6.06686e+06	15888175	2.31362e+06	6533597	0	FALSE
+56.063AYGPGIEPTGNMVK+56.063	tr|Q60FE5|Q60FE5_HUMAN;tr|F8WE98|F8WE98_HUMAN;tr|A0A087WWY3|A0A087WWY3_HUMAN;sp|P21333|FLNA_HUMAN;sp|P21333-2|FLNA_HUMAN	44586988	23607564	638258	22619010	1.62214e+06	6859760	0	FALSE
+56.063LDGLVETPTGYIESLPR	tr|B7Z9C2|B7Z9C2_HUMAN;tr|F8W0J6|F8W0J6_HUMAN;tr|F8VRJ2|F8VRJ2_HUMAN;tr|H0YHC3|H0YHC3_HUMAN;tr|F8W118|F8W118_HUMAN;tr|F8VV59|F8VV59_HUMAN;tr|F8W020|F8W020_HUMAN;tr|H0YIV4|H0YIV4_HUMAN;tr|F5H4R6|F5H4R6_HUMAN;tr|F8VUX1|F8VUX1_HUMAN;tr|F8VY35|F8VY35_HUMAN;tr|F8VXI6|F8VXI6_HUMAN;sp|P55209|NP1L1_HUMAN;sp|P55209-2|NP1L1_HUMAN;sp|P55209-3|NP1L1_HUMAN	77146368	36364568	4877493	38972948	8448417	17718226	0	FALSE
+56.063SAEEAASVLATSISPEQC+57.021IK+56.063	tr|E3W994|E3W994_HUMAN;tr|J3KR49|J3KR49_HUMAN;tr|E7EW49|E7EW49_HUMAN;tr|E7ERI8|E7ERI8_HUMAN;tr|A0A0U1RQI6|A0A0U1RQI6_HUMAN;sp|O75122|CLAP2_HUMAN;sp|O75122-3|CLAP2_HUMAN	13021333	16832494	161765	2.9886e+06	0	0	0	FALSE
+56.063ATSELILLPVTGLEC+57.021VGDR	tr|E9PBK6|E9PBK6_HUMAN;tr|C9K020|C9K020_HUMAN;tr|E5RFX3|E5RFX3_HUMAN;tr|F8WE36|F8WE36_HUMAN;tr|A0A087X295|A0A087X295_HUMAN;sp|Q9NNW5|WDR6_HUMAN	987083	454358	269639	494744	78454.2	466328	0	FALSE
+56.063YIAENGTDPINNQPLSEEQLIDIK+56.063	tr|F5GY56|F5GY56_HUMAN;sp|Q9UMS4|PRP19_HUMAN	57809252	39687900	8620612	26346556	11556128	14939197	0	FALSE
+56.063TPSTMENDSSNLDPSQAPSLAQPLVFSNSK+56.063	tr|Q5VU77|Q5VU77_HUMAN;tr|F8W726|F8W726_HUMAN;sp|Q14157|UBP2L_HUMAN;sp|Q14157-1|UBP2L_HUMAN;sp|Q14157-3|UBP2L_HUMAN;sp|Q14157-4|UBP2L_HUMAN;sp|Q14157-5|UBP2L_HUMAN	13556736	8.20499e+06	2.96227e+06	7.66721e+06	4112313	4171381	0	FALSE
+56.063ESTGNMVTGQTVC+57.021K+56.063	tr|E7EN77|E7EN77_HUMAN;sp|Q15021|CND1_HUMAN	19449334	27529092	10785090	11427915	10923049	2.71005e+06	0	FALSE
+56.063GAGIGGLGITVEGPSESK+56.063	tr|E7EN95|E7EN95_HUMAN;sp|O75369|FLNB_HUMAN;sp|O75369-2|FLNB_HUMAN;sp|O75369-3|FLNB_HUMAN;sp|O75369-7|FLNB_HUMAN;sp|O75369-4|FLNB_HUMAN;sp|O75369-5|FLNB_HUMAN;sp|O75369-6|FLNB_HUMAN;sp|O75369-8|FLNB_HUMAN;sp|O75369-9|FLNB_HUMAN	53260304	25628312	6807997	19818464	4.49183e+06	9749987	0	FALSE
+56.063LAATNALLNSLEFTK+56.063	tr|J3KTM9|J3KTM9_HUMAN;sp|Q14974|IMB1_HUMAN;sp|Q14974-2|IMB1_HUMAN	394217	129773	54969	139520	37047.8	0	0.000969982	FALSE
+56.063VLAGETLSVNDPPDVLDR	tr|K7EQR9|K7EQR9_HUMAN;tr|K7EKJ9|K7EKJ9_HUMAN;sp|Q12906|ILF3_HUMAN;sp|Q12906-2|ILF3_HUMAN;sp|Q12906-3|ILF3_HUMAN;sp|Q12906-4|ILF3_HUMAN;sp|Q12906-5|ILF3_HUMAN;sp|Q12906-6|ILF3_HUMAN;sp|Q12906-7|ILF3_HUMAN	35596928	20208638	2.67989e+06	23253050	11784693	9281233	0	FALSE
+56.063AGTGVDNVDLEAATR	tr|A0A286YFM8|A0A286YFM8_HUMAN;tr|A0A286YFA2|A0A286YFA2_HUMAN;tr|A0A286YFC8|A0A286YFC8_HUMAN;tr|A0A2C9F2M7|A0A2C9F2M7_HUMAN;tr|A0A286YF22|A0A286YF22_HUMAN;tr|A0A286YFL2|A0A286YFL2_HUMAN;tr|A0A286YER3|A0A286YER3_HUMAN;tr|A0A286YFB2|A0A286YFB2_HUMAN;sp|O43175|SERA_HUMAN	522423488	261404048	36099168	286530784	61265864	139392128	0	FALSE
+56.063LVQDVANNTNEEAGDGTTTATVLAR	tr|E7EXB4|E7EXB4_HUMAN;tr|C9JL25|C9JL25_HUMAN;tr|E7ESH4|E7ESH4_HUMAN;sp|P10809|CH60_HUMAN;sp|P10809-2|CH60_HUMAN	461197568	282288992	31655136	261805728	67951312	136285248	0	FALSE
+56.063LYGSAGPPPTGEEDTAEK+56.063DEL	sp|P11021|BIP_HUMAN	1694802688	821485440	100981552	753118400	109324656	390077312	0	FALSE
+56.063AGTGVDNVDLEAATR	tr|A0A286YFM8|A0A286YFM8_HUMAN;tr|A0A286YFA2|A0A286YFA2_HUMAN;tr|A0A286YFC8|A0A286YFC8_HUMAN;tr|A0A2C9F2M7|A0A2C9F2M7_HUMAN;tr|A0A286YF22|A0A286YF22_HUMAN;tr|A0A286YFL2|A0A286YFL2_HUMAN;tr|A0A286YER3|A0A286YER3_HUMAN;tr|A0A286YFB2|A0A286YFB2_HUMAN;sp|O43175|SERA_HUMAN	520225440	266181744	32253864	274627008	59043408	136521040	0	FALSE
+56.063AIAELGIYPAVDPLDSTSR	tr|H0YH81|H0YH81_HUMAN;sp|P06576|ATPB_HUMAN	179078416	97244752	12423867	97566232	20298652	52222648	0	FALSE
+56.063GGPASVPSSSPGTSVK+56.063	tr|J3KRZ2|J3KRZ2_HUMAN;tr|J3KRI4|J3KRI4_HUMAN;sp|O43237|DC1L2_HUMAN;sp|O43237-2|DC1L2_HUMAN	27669812	12273359	101039	12656377	1.00545e+06	5379507	0	FALSE
+56.063VDATEESDLAQQYGVR	tr|I3NI03|I3NI03_HUMAN;tr|H7BZ94|H7BZ94_HUMAN;tr|I3L3U6|I3L3U6_HUMAN;sp|P07237|PDIA1_HUMAN	143630576	80937544	8140722	73700760	13158083	47155604	0	FALSE
+56.063IAPPEAPVTGYM+15.995FGK+56.063	sp|P09874|PARP1_HUMAN	21534162	9654581	1.79575e+06	9294140	327685	4.26596e+06	0.000969982	FALSE
+56.063SDAPTGDVLLDEALK+56.063	sp|Q9H4A6|GOLP3_HUMAN	11595864	5.23724e+06	1.59943e+06	8994399	3060229	3.60962e+06	0	FALSE
+56.063DLNC+57.021VPEIADTLGAVAK+56.063	tr|G3V507|G3V507_HUMAN;tr|G3V2F5|G3V2F5_HUMAN;tr|G3V580|G3V580_HUMAN;tr|C9JSX3|C9JSX3_HUMAN;tr|G3V2X6|G3V2X6_HUMAN;tr|G3V2L6|G3V2L6_HUMAN;sp|O14744|ANM5_HUMAN;sp|O14744-5|ANM5_HUMAN	24328510	12290234	1156285	12938799	2.57808e+06	7.62633e+06	0	FALSE
+56.063ITNLTQQLEQASIVK+56.063	sp|P15924|DESP_HUMAN	12604769	4.99612e+06	711314	5.21614e+06	295267	2.79168e+06	0	FALSE
+56.063SSFYPDGGDQETAK+56.063	tr|E9PKI6|E9PKI6_HUMAN;tr|H0YF00|H0YF00_HUMAN;tr|E9PK91|E9PK91_HUMAN;tr|E9PJA7|E9PJA7_HUMAN;tr|A0A1W2PQ43|A0A1W2PQ43_HUMAN;tr|E9PK09|E9PK09_HUMAN;tr|E9PQN2|E9PQN2_HUMAN;sp|Q9NYF8|BCLF1_HUMAN;sp|Q9NYF8-2|BCLF1_HUMAN;sp|Q9NYF8-3|BCLF1_HUMAN;sp|Q9NYF8-4|BCLF1_HUMAN	35675176	16303946	1.13775e+06	18301934	3.16653e+06	8264659	0	FALSE
+56.063LVAGEM+15.995GQNEPDQGGQR	tr|Q5H928|Q5H928_HUMAN;sp|Q99714|HCD2_HUMAN;sp|Q99714-2|HCD2_HUMAN	8836274	4.114e+06	688224	3.89825e+06	1.21624e+06	2.5504e+06	0	FALSE
+56.063LVTSPC+57.021C+57.021IVTSTYGWTANM+15.995ER	sp|P07900|HS90A_HUMAN;sp|P07900-2|HS90A_HUMAN	76245728	37910484	6.77796e+06	38404036	8889519	15419493	0	FALSE
+56.063NC+57.021GC+57.021LGASPNLEQLQEENLK+56.063	tr|E5RH09|E5RH09_HUMAN;tr|E5RJM9|E5RJM9_HUMAN;sp|P54136|SYRC_HUMAN	28528208	12540752	2.0735e+06	14836279	4400927	7.32695e+06	0	FALSE
+56.063NFILDQTNVSAAAQR	tr|A0A1W2PQL0|A0A1W2PQL0_HUMAN;tr|A0A1W2PQD4|A0A1W2PQD4_HUMAN;tr|A0A1W2PP34|A0A1W2PP34_HUMAN;tr|Q5RI18|Q5RI18_HUMAN;tr|A0A1W2PQ74|A0A1W2PQ74_HUMAN;tr|A0A1W2PPH7|A0A1W2PPH7_HUMAN;tr|A0A1W2PP35|A0A1W2PP35_HUMAN;tr|A0A1W2PPL4|A0A1W2PPL4_HUMAN;tr|A0A1W2PPS1|A0A1W2PPS1_HUMAN;tr|A0A1X7SBS1|A0A1X7SBS1_HUMAN;tr|A0A1W2PRZ7|A0A1W2PRZ7_HUMAN;sp|Q00839|HNRPU_HUMAN;sp|Q00839-2|HNRPU_HUMAN	13023537	23143964	4776164	5.97381e+06	7998606	2.11099e+06	0	FALSE
+56.063EEAAAVPAAAPDDLALLK+56.063	tr|E5RJU9|E5RJU9_HUMAN;sp|Q86UE4|LYRIC_HUMAN	22915172	9461852	2942541	9030265	1.62871e+06	5138681	0	FALSE
+56.063GTVLDQVPVNPSLYLIK+56.063	sp|Q9Y657|SPIN1_HUMAN;sp|Q5JUX0|SPIN3_HUMAN	3.12085e+06	1.27626e+06	471027	1654248	402108	752153	0	FALSE
+56.063VMTIPYQPM+15.995PASSPVIC+57.021AGGQDR	sp|Q15365|PCBP1_HUMAN	27958250	13598103	1.6945e+06	11261131	2.06364e+06	4.05313e+06	0	FALSE
+56.063LVSPGSANETSSILVESVTR	tr|E7EN95|E7EN95_HUMAN;tr|A0A0A0MT44|A0A0A0MT44_HUMAN;sp|O75369|FLNB_HUMAN;sp|O75369-2|FLNB_HUMAN;sp|O75369-3|FLNB_HUMAN;sp|O75369-7|FLNB_HUMAN;sp|O75369-6|FLNB_HUMAN;sp|O75369-8|FLNB_HUMAN;sp|O75369-9|FLNB_HUMAN	41736556	21162076	1.89256e+06	20536546	2.7476e+06	7864386	0.000969982	FALSE
+56.063GYYSPYSVSGSGSTAGSR	tr|H0YDN1|H0YDN1_HUMAN;sp|Q15149|PLEC_HUMAN;sp|Q15149-2|PLEC_HUMAN;sp|Q15149-3|PLEC_HUMAN;sp|Q15149-4|PLEC_HUMAN;sp|Q15149-5|PLEC_HUMAN;sp|Q15149-6|PLEC_HUMAN;sp|Q15149-7|PLEC_HUMAN;sp|Q15149-8|PLEC_HUMAN;sp|Q15149-9|PLEC_HUMAN	14574567	9036324	0	8673116	1546781	3.8708e+06	0.000969982	FALSE
+56.063ATDLGGTSQAGTSQR	tr|C9J6P4|C9J6P4_HUMAN;sp|Q7Z2W4|ZCCHV_HUMAN;sp|Q7Z2W4-2|ZCCHV_HUMAN;sp|Q7Z2W4-3|ZCCHV_HUMAN	3598303	1.74427e+06	100836	1.76691e+06	221723	698892	0	FALSE
+56.063DLQPFPTC+57.021QALVYR	sp|Q14137|BOP1_HUMAN;sp|Q14137-2|BOP1_HUMAN	16544193	9518322	0	10476841	1.24198e+06	2.72594e+06	0	FALSE
+56.063VM+15.995TIPYQPM+15.995PASSPVIC+57.021AGGQDR	sp|Q15365|PCBP1_HUMAN	17685262	10765078	2.62599e+06	7.25423e+06	1.55202e+06	3.39943e+06	0	FALSE
+56.063ALTVPELTQQVFDAK+56.063	tr|Q5ST81|Q5ST81_HUMAN;tr|Q5JP53|Q5JP53_HUMAN;sp|P07437|TBB5_HUMAN	700286080	347425472	44898224	348815040	69265824	139870672	0	FALSE
+56.063APLATGEDDDDEVPDLVENFDEASK+56.063NEAN	sp|P20290|BTF3_HUMAN;sp|P20290-2|BTF3_HUMAN	37557652	18664498	3.54685e+06	15308010	3103834	6.18801e+06	0	FALSE
+56.063NAPVTFIVDGAVVK+56.063	sp|Q9H5V9|CX056_HUMAN;sp|Q9H5V9-2|CX056_HUMAN;sp|Q9H5V9-3|CX056_HUMAN	16709979	7.88835e+06	1.16928e+06	7636333	1.08382e+06	3268252	0	FALSE
+56.063VIVVGNPANTNC+57.021LTASK+56.063	tr|B9A041|B9A041_HUMAN;tr|C9JF79|C9JF79_HUMAN;tr|C9JRL4|C9JRL4_HUMAN;sp|P40925|MDHC_HUMAN;sp|P40925-2|MDHC_HUMAN;sp|P40925-3|MDHC_HUMAN	458997664	241651472	23592196	285144480	48356028	110818824	0	FALSE
+56.063LSPEPWTPETGLVTDAFK+56.063	sp|O95573|ACSL3_HUMAN;sp|O60488|ACSL4_HUMAN;sp|O60488-2|ACSL4_HUMAN	14953907	7.46542e+06	1.03992e+06	7548612	947848	5978481	0	FALSE
+56.063NM+15.995GGPYGGGNYGPGGSGGSGGYGGR	sp|P22626|ROA2_HUMAN;sp|P22626-2|ROA2_HUMAN	11049769	9994774	1.79586e+06	1.96818e+06	2.573e+06	1.53302e+06	0	FALSE
+56.063STGGAPTFNVTVTK+56.063	tr|K7EJ44|K7EJ44_HUMAN;sp|P07737|PROF1_HUMAN	1633403392	830024512	85454952	832236416	159335600	363269088	0	FALSE
+56.063GPSGC+57.021VESLEVTC+57.021R	tr|A0A0U1RQX9|A0A0U1RQX9_HUMAN;tr|H7C0R3|H7C0R3_HUMAN;tr|A0A0U1RQX5|A0A0U1RQX5_HUMAN;tr|A0A1B0GVU9|A0A1B0GVU9_HUMAN;tr|B4DDN1|B4DDN1_HUMAN;sp|P47897|SYQ_HUMAN;sp|P47897-2|SYQ_HUMAN	12284329	6115224	0	8538003	2.91986e+06	2.55782e+06	0	FALSE
+56.063ITQQGTDPLVLAVQSK+56.063	sp|Q8N556|AFAP1_HUMAN;sp|Q8N556-2|AFAP1_HUMAN	15784758	7021479	2.00255e+06	6808978	2.37256e+06	5.96614e+06	0	FALSE
+56.063LLEDGEDFNLGDALDSSNSM+15.995QTIQK+56.063	sp|P05783|K1C18_HUMAN	16549893	8775394	9328703	8930487	4.55277e+06	6280128	0.000969982	FALSE
+56.063NSVTPDMMEEMYK+56.063	tr|A0A2R8Y6J3|A0A2R8Y6J3_HUMAN;sp|P46777|RL5_HUMAN	21709938	7.21086e+06	372527	9677825	1.75061e+06	19218514	0	FALSE
+56.063TTELPAADPFALAPFPSK+56.063	tr|A0A096LP25|A0A096LP25_HUMAN;sp|Q6ZSR9|YJ005_HUMAN	2.43773e+06	1.22347e+06	118041	1.4158e+06	223492	443908	0	FALSE
+56.063VQEAINSLGGSVFPK+56.063	tr|X6RA30|X6RA30_HUMAN;tr|X6RKY7|X6RKY7_HUMAN;sp|O75794|CD123_HUMAN	46133180	22081440	4719475	11757877	12729054	3.77629e+06	0.000969982	FALSE
+56.063NTNAGAPPGTAYQSPLPLSR	tr|E9PDF2|E9PDF2_HUMAN;tr|C9J4G7|C9J4G7_HUMAN;tr|A0A0D9SFS3|A0A0D9SFS3_HUMAN;tr|E9PCR7|E9PCR7_HUMAN;sp|Q02218|ODO1_HUMAN;sp|Q02218-2|ODO1_HUMAN;sp|Q02218-3|ODO1_HUMAN	48283040	26899382	2.17771e+06	28015764	4.56985e+06	12626616	0	FALSE
+56.063LVGQGASAVLLDLPNSGGEAQAK+56.063	tr|Q5H928|Q5H928_HUMAN;sp|Q99714|HCD2_HUMAN;sp|Q99714-2|HCD2_HUMAN	14129824	7.58392e+06	0	7177320	769966	3.20288e+06	0	FALSE
+56.063TYDAASYIC+57.021EAAFDEVK+56.063	sp|P42166|LAP2A_HUMAN	10377966	2.90929e+06	476879	4292310	147082	1.36168e+06	0.000969982	FALSE
+56.063TLAVPPEASIATLNQLC+57.021ATK+56.063	tr|E9PNR2|E9PNR2_HUMAN;sp|Q13671|RIN1_HUMAN;sp|Q13671-2|RIN1_HUMAN	9790038	5244847	1.67172e+06	5.92547e+06	991378	851565	0	FALSE
+56.063AQEPESGLSEETQVK+56.063	sp|P78527|PRKDC_HUMAN;sp|P78527-2|PRKDC_HUMAN	41977404	17116982	3.16392e+06	17979100	2978794	7160104	0	FALSE
+58.075YVQLPADEVDTQLLQDAAR	sp|Q9Y333|LSM2_HUMAN	61713408	33152150	4367041	33534756	6.29389e+06	16023821	0	FALSE
+56.063VVSEDFLQDVSASTK+56.063	sp|P09874|PARP1_HUMAN	83271376	45270848	5.15129e+06	43033848	5.69676e+06	22893576	0	FALSE
+56.063LVSQDNFGFDLPAVEAATK+56.063	tr|A0A087WUZ3|A0A087WUZ3_HUMAN;tr|F8W6C1|F8W6C1_HUMAN;sp|Q01082|SPTB2_HUMAN;sp|Q01082-2|SPTB2_HUMAN;sp|Q01082-3|SPTB2_HUMAN	39616880	19812260	2.5493e+06	21866410	3.00516e+06	9918340	0.000969982	FALSE
+56.063LVAGEM+15.995GQNEPDQGGQR	tr|Q5H928|Q5H928_HUMAN;sp|Q99714|HCD2_HUMAN;sp|Q99714-2|HCD2_HUMAN	55795896	29220460	3.16789e+06	29001732	7629737	19521158	0	FALSE
+56.063TVESEAASYLDQISR	tr|K7ESG5|K7ESG5_HUMAN;tr|A0A087WTV2|A0A087WTV2_HUMAN;tr|K7ENH2|K7ENH2_HUMAN;tr|B3KQ25|B3KQ25_HUMAN;tr|K9J957|K9J957_HUMAN;sp|P61289|PSME3_HUMAN;sp|P61289-2|PSME3_HUMAN;sp|P61289-3|PSME3_HUMAN	11736780	4541832	0	5057854	754961	262747	0	FALSE
+56.063VDTNAPDLSLEGPEGK+56.063	sp|Q09666|AHNK_HUMAN	52883836	23631164	4.00297e+06	21189944	1257312	14095373	0	FALSE
+56.063TLTAAAVSGAQPILSK+56.063	tr|K7EL96|K7EL96_HUMAN;tr|K7ER39|K7ER39_HUMAN;sp|O60664|PLIN3_HUMAN;sp|O60664-3|PLIN3_HUMAN;sp|O60664-4|PLIN3_HUMAN	37336700	18311448	4.32068e+06	17613268	3.17192e+06	7378565	0	FALSE
+56.063QFVTPADVVSGNPK+56.063	tr|A0A0A0MSQ0|A0A0A0MSQ0_HUMAN;tr|H7C4N2|H7C4N2_HUMAN;sp|P13797|PLST_HUMAN;sp|P13797-2|PLST_HUMAN;sp|P13797-3|PLST_HUMAN;sp|Q14651|PLSI_HUMAN	35574816	16433067	1267172	16866296	1.24739e+06	5620741	0	FALSE
+56.063VNQIGSVTESLQAC+57.021K+56.063	tr|A0A2R8Y6G6|A0A2R8Y6G6_HUMAN;sp|P06733|ENOA_HUMAN;sp|P06733-2|ENOA_HUMAN	76588000	38296080	3.23361e+06	29896762	7030567	13668195	0	FALSE
+56.063VNQIGSVTESIQAC+57.021K+56.063	sp|P13929|ENOB_HUMAN;sp|P13929-2|ENOB_HUMAN;sp|P13929-3|ENOB_HUMAN	76588000	38296080	3.23361e+06	29896762	7030567	13668195	0	FALSE
+56.063GYDVIAQAQSGTGK+56.063	tr|J3KT04|J3KT04_HUMAN;tr|E7EQG2|E7EQG2_HUMAN;tr|J3KT12|J3KT12_HUMAN;tr|J3QL43|J3QL43_HUMAN;tr|J3QS69|J3QS69_HUMAN;tr|J3QLN6|J3QLN6_HUMAN;tr|J3KSN7|J3KSN7_HUMAN;tr|J3QKZ9|J3QKZ9_HUMAN;tr|J3KS93|J3KS93_HUMAN;tr|J3QR64|J3QR64_HUMAN;tr|E7EMV8|E7EMV8_HUMAN;tr|J3KS25|J3KS25_HUMAN;tr|J3KTB5|J3KTB5_HUMAN;sp|Q14240|IF4A2_HUMAN;sp|Q14240-2|IF4A2_HUMAN;sp|P60842|IF4A1_HUMAN;sp|P60842-2|IF4A1_HUMAN	208133136	98690056	17749926	101879760	27302434	52774392	0	FALSE
+56.063TASNVEEAFINTAK+56.063	tr|H7C125|H7C125_HUMAN;sp|P61019|RAB2A_HUMAN;sp|P61019-2|RAB2A_HUMAN	38441632	22996268	1.10556e+06	8771683	4396975	365829	0	FALSE
+56.063AEDNADTLALVFEAPNQEK+56.063	sp|P12004|PCNA_HUMAN	29784522	16021917	1.43713e+06	15626668	1.91706e+06	9145718	0	FALSE
+56.063QSDDEVYAPGLDIESSLK+56.063	sp|Q15459|SF3A1_HUMAN;sp|Q15459-2|SF3A1_HUMAN	19401870	10720666	5924851	12860848	2.15428e+06	3.81251e+06	0	FALSE
+56.063LQPAYQVTLPGQEPIVK+56.063	tr|A0A087X1L6|A0A087X1L6_HUMAN;sp|P41214|EIF2D_HUMAN;sp|P41214-2|EIF2D_HUMAN	25778748	44549584	6427605	24585682	2.2188e+06	6250029	0.000969982	FALSE
+56.063VGSGDTNNFPYLEK+56.063	sp|Q9NR45|SIAS_HUMAN	37281684	40083892	22034438	20276880	17655838	12468428	0	FALSE
+56.063LASVPAGGAVAVSAAPGSAAPAAGSAPAAAEEK+56.063	tr|H0YDD8|H0YDD8_HUMAN;sp|P05387|RLA2_HUMAN	6871588	944570	2.12574e+06	1.25516e+06	582303	2.41793e+06	0.000969982	FALSE
+56.063ASEVM+15.995GPVEAAPEYR	tr|E7EVX8|E7EVX8_HUMAN;tr|E7EN72|E7EN72_HUMAN;tr|E7ESX0|E7ESX0_HUMAN;tr|E7EU94|E7EU94_HUMAN;sp|Q8WWY3|PRP31_HUMAN;sp|Q8WWY3-2|PRP31_HUMAN;sp|Q8WWY3-4|PRP31_HUMAN	10427304	4.39591e+06	0	2.99917e+06	2.12004e+06	3.96104e+06	0	FALSE
+56.063TVAQSQQLETNSQR	sp|P40938|RFC3_HUMAN;sp|P40938-2|RFC3_HUMAN	13822706	7.57482e+06	1.15618e+06	11935176	2171531	4333008	0	FALSE
+56.063GASQAGM+15.995TGYGMPR	tr|C9J5W6|C9J5W6_HUMAN;sp|P37802|TAGL2_HUMAN;sp|P37802-2|TAGL2_HUMAN;sp|Q9UI15|TAGL3_HUMAN	51885460	27442606	256062	19298074	2221544	6469441	0	FALSE
+56.063LC+57.021LQQGQLC+57.021EPLPSLAESR	tr|G5E977|G5E977_HUMAN;sp|Q6XQN6|PNCB_HUMAN;sp|Q6XQN6-2|PNCB_HUMAN	4975630	3476347	1.24616e+06	2.14546e+06	1.3451e+06	753282	0.000969982	FALSE
+56.063LVSIGAEEIVDGNAK+56.063	sp|O43707|ACTN4_HUMAN	15131306	9210545	718046	8.38056e+06	1.88001e+06	3.82571e+06	0	FALSE
+56.063IGYSSPLTLSDQSSK+56.063	sp|O60488|ACSL4_HUMAN;sp|O60488-2|ACSL4_HUMAN	9997847	6309836	6946177	4.53166e+06	1.3085e+06	3.7533e+06	0	FALSE
+56.063YIAENGTDPINNQPLSEEQLIDIK+56.063	tr|F5GY56|F5GY56_HUMAN;sp|Q9UMS4|PRP19_HUMAN	56537292	39488432	8465620	26051350	13500110	14865997	0	FALSE
+56.063VDIDVPDVNLEAPEGK+56.063	sp|Q09666|AHNK_HUMAN	10430206	6118423	1.10256e+06	5.48752e+06	1.73873e+06	2.93756e+06	0	FALSE
+56.063FSNSIPQSQTGNSETATPTNVDLPQVIPK+56.063	sp|P46087|NOP2_HUMAN;sp|P46087-2|NOP2_HUMAN;sp|P46087-4|NOP2_HUMAN	83012832	42586092	6571579	41220708	10939847	17954374	0	FALSE
+56.063ISQSNYIPTQQDVLR	sp|P08754|GNAI3_HUMAN	32424016	15438890	2.28995e+06	16571094	2638147	8.06147e+06	0	FALSE
+56.063TGGAYGEDLGADYNLSQVC+57.021DGK+56.063	tr|A0A0U1RQF0|A0A0U1RQF0_HUMAN;sp|P49327|FAS_HUMAN	33603196	16488859	2.51366e+06	17813986	1.9284e+06	28605188	0	FALSE
+56.063LEQGQAIDDLMPAQK+56.063	tr|H0YJG0|H0YJG0_HUMAN;sp|P12277|KCRB_HUMAN	58596984	222869088	92225032	35423232	63164916	17249486	0	FALSE
+56.063SSTPLPTISSSAENTR	tr|H0YJH7|H0YJH7_HUMAN;tr|G5E972|G5E972_HUMAN;sp|P42166|LAP2A_HUMAN;sp|P42167|LAP2B_HUMAN;sp|P42167-2|LAP2B_HUMAN;sp|P42167-3|LAP2B_HUMAN	146660256	78496960	12162531	94159160	17859266	52028392	0	FALSE
+56.063SIAVAEAAC+57.021PGITDK+56.063	tr|B4E0Y9|B4E0Y9_HUMAN;tr|Q8NBY1|Q8NBY1_HUMAN;sp|Q9P289|STK26_HUMAN;sp|Q9P289-2|STK26_HUMAN;sp|Q9P289-3|STK26_HUMAN	19103304	9981129	2.88525e+06	6.90305e+06	2.7584e+06	2.10899e+06	0	FALSE
+56.063AIAELGIYPAVDPLDSTSR	tr|H0YH81|H0YH81_HUMAN;sp|P06576|ATPB_HUMAN	55241780	29912072	3.19785e+06	30795412	5.92843e+06	16754353	0	FALSE
+56.063LC+57.021YYIGATDDAATK+56.063	tr|A8K878|A8K878_HUMAN;sp|P55145|MANF_HUMAN	49289916	22183684	6777785	25381730	5.13957e+06	12477941	0	FALSE
+56.063AGAIAPC+57.021EVTVPAQNTGLGPEK+56.063	tr|G3V210|G3V210_HUMAN;tr|F8VRK7|F8VRK7_HUMAN;tr|F8VPE8|F8VPE8_HUMAN;tr|F8VWS0|F8VWS0_HUMAN;tr|F8VU65|F8VU65_HUMAN;tr|F8VQY6|F8VQY6_HUMAN;tr|F8VW21|F8VW21_HUMAN;sp|P05388|RLA0_HUMAN;sp|P05388-2|RLA0_HUMAN;sp|Q8NHW5|RLA0L_HUMAN	71115104	34087308	3.22393e+06	29518266	7842342	12783665	0	FALSE
+64.113VAASC+57.021GAIQYIPTELDQVR	tr|E9PN86|E9PN86_HUMAN;tr|J3KNJ2|J3KNJ2_HUMAN;sp|Q7L2H7|EIF3M_HUMAN	6.38354e+06	3.87612e+06	0	7.84838e+06	6680299	4060394	0.000969982	FALSE
+56.063STGTETGSNINVNSELNPSTGNR	sp|Q29RF7|PDS5A_HUMAN	27482812	12143343	1.54073e+06	15300340	2.65389e+06	5.68937e+06	0	FALSE
+56.063VMTIPYQPMPASSPVIC+57.021AGGQDR	sp|Q15365|PCBP1_HUMAN	46218548	18754382	6198542	15738115	2.33888e+06	6302440	0	FALSE
+56.063GGGAFVQNSQPVAVR	sp|P33176|KINH_HUMAN	26020494	11400966	4780842	10367365	3587560	3.17182e+06	0	FALSE
+56.063AVVVNAAQLASYSQSK+56.063	tr|I3L1P8|I3L1P8_HUMAN;sp|Q02978|M2OM_HUMAN;sp|Q02978-2|M2OM_HUMAN	27658958	12470719	2725714	15268807	4955043	9382669	0	FALSE
+56.063ALNEAC+57.021ESVIQTAC+57.021K+56.063	tr|H3BM42|H3BM42_HUMAN;sp|Q92896|GSLG1_HUMAN;sp|Q92896-2|GSLG1_HUMAN;sp|Q92896-3|GSLG1_HUMAN	22053192	9394694	603343	11255262	1583351	3.15497e+06	0	FALSE
+62.100LC+57.021PPGIPTPGSGLPPPR	tr|F8VPD4|F8VPD4_HUMAN;sp|P27708|PYR1_HUMAN	35069676	57944192	6.53197e+06	62425156	35473648	2966002	0	FALSE
+56.063VPADTEVVC+57.021APPTAYIDFAR	sp|P60174|TPIS_HUMAN;sp|P60174-1|TPIS_HUMAN	1636712320	868151616	124368768	830081856	161566288	375061280	0	FALSE
+56.063FMQTFVLAPEGSVANK+56.063	tr|E5RIZ6|E5RIZ6_HUMAN;sp|Q13283|G3BP1_HUMAN	12611488	6.67343e+06	930424	5.99155e+06	1.06677e+06	3.75384e+06	0	FALSE
+56.063LASVPAGGAVAVSAAPGSAAPAAGSAPAAAEEK+56.063	tr|H0YDD8|H0YDD8_HUMAN;sp|P05387|RLA2_HUMAN	5.42436e+06	4.53992e+06	0	0	77.6306	0	0.000969982	FALSE
+56.063ESTGAQVQVAGDM+15.995LPNSTER	tr|E9PFP8|E9PFP8_HUMAN;tr|F8VZX2|F8VZX2_HUMAN;tr|F8VXH9|F8VXH9_HUMAN;tr|F8W0G4|F8W0G4_HUMAN;tr|J3QT27|J3QT27_HUMAN;tr|H3BRU6|H3BRU6_HUMAN;sp|Q15366|PCBP2_HUMAN;sp|Q15366-2|PCBP2_HUMAN;sp|Q15366-3|PCBP2_HUMAN;sp|Q15366-4|PCBP2_HUMAN;sp|Q15366-5|PCBP2_HUMAN;sp|Q15366-6|PCBP2_HUMAN;sp|Q15366-7|PCBP2_HUMAN;sp|Q15366-8|PCBP2_HUMAN;sp|Q15365|PCBP1_HUMAN;sp|P57721|PCBP3_HUMAN;sp|P57721-2|PCBP3_HUMAN;sp|…	337743520	170751440	22847584	168979760	39340704	85519440	0.000969982	FALSE
+56.063LVAGEMGQNEPDQGGQR	tr|Q5H928|Q5H928_HUMAN;sp|Q99714|HCD2_HUMAN;sp|Q99714-2|HCD2_HUMAN	10238922	5620047	339574	4.79588e+06	964525	2.20342e+06	0	FALSE
+56.063LAPITSDPTEATAVGAVEASFK+56.063	tr|B4DNK4|B4DNK4_HUMAN;sp|P14618|KPYM_HUMAN;sp|P14618-3|KPYM_HUMAN	818781312	429237408	60198196	420568416	91137280	183843728	0	FALSE
+56.063ATTPADGEEPAPEAEALAAAR	tr|Q5JZ02|Q5JZ02_HUMAN;sp|Q96S44|PRPK_HUMAN	22844360	12113501	0	9805021	921831	2.31893e+06	0	FALSE
+56.063C+57.021ELLYEGPPDDEAAM+15.995GIK+56.063	sp|P13639|EF2_HUMAN	31326758	14378239	4330044	12454021	5774989	4390220	0	FALSE
+56.063IAVYSC+57.021PFDGMITETK+56.063	sp|P50990|TCPQ_HUMAN;sp|P50990-2|TCPQ_HUMAN;sp|P50990-3|TCPQ_HUMAN	58414556	29685922	2710179	28313640	4503033	12785521	0	FALSE
+56.063DASLM+15.995VTNDGATILK+56.063	tr|F5GWF6|F5GWF6_HUMAN;tr|F8VQ14|F8VQ14_HUMAN;sp|P78371|TCPB_HUMAN;sp|P78371-2|TCPB_HUMAN	14289131	6303861	4212865	17309572	1.93543e+06	4.06291e+06	0	FALSE
+56.063GAEPETGSAVSAAQC+57.021QVGPTR	tr|F8W8L6|F8W8L6_HUMAN;tr|E7ERK9|E7ERK9_HUMAN;tr|A0A087WW69|A0A087WW69_HUMAN;sp|Q9UI10|EI2BD_HUMAN	16502149	7938678	2.08382e+06	8123775	1.02787e+06	3.52442e+06	0.000969982	FALSE
+56.063FGQAATMEGIGAIGGTPPAFNR	sp|Q15233|NONO_HUMAN;sp|Q15233-2|NONO_HUMAN	5.84802e+06	4320021	1211896	3829243	2.69916e+06	2.39171e+06	0	FALSE
+56.063VM+15.995TIPYQPM+15.995PASSPVIC+57.021AGGQDR	sp|Q15365|PCBP1_HUMAN	94485312	58015792	26198328	108069032	29492140	111992192	0	FALSE
+56.063GAEPPGISASTQPASAGR	sp|A0FGR8-2|ESYT2_HUMAN	8868760	85052.8	330578	2.98696e+06	7422725	344347	0.000969982	FALSE
+56.063QAGGFLGPPPPSGK+56.063	tr|J9JIE6|J9JIE6_HUMAN;tr|J3QQY2|J3QQY2_HUMAN;sp|Q9UM00|TMCO1_HUMAN;sp|Q9UM00-2|TMCO1_HUMAN	36068596	12574813	3.50729e+06	13541662	1.70062e+06	7.72844e+06	0	FALSE
+56.063APLNVTNTAGTSLPSVDLLQK+56.063	sp|Q9NPI6|DCP1A_HUMAN;sp|Q9NPI6-2|DCP1A_HUMAN	11020481	5232631	700402	5.78086e+06	1.48417e+06	2.67786e+06	0.000969982	FALSE
+56.063VGINYQPPTVVPGGDLAK+56.063	tr|C9J2C0|C9J2C0_HUMAN;tr|F5H5D3|F5H5D3_HUMAN;tr|A0A1W2PQM2|A0A1W2PQM2_HUMAN;tr|V9GZ17|V9GZ17_HUMAN;sp|P68363|TBA1B_HUMAN;sp|P68363-2|TBA1B_HUMAN;sp|Q9NY65|TBA8_HUMAN;sp|Q9NY65-2|TBA8_HUMAN;sp|P68366|TBA4A_HUMAN;sp|P68366-2|TBA4A_HUMAN;sp|P0DPH7|TBA3C_HUMAN;sp|P0DPH7-2|TBA3C_HUMAN;sp|P0DPH8|TBA3D_HUMAN;sp|Q6PEY2|TBA3E_HUMAN;sp|Q71U36|TBA1A_HUMAN;sp|Q71U36-2|TBA1A_HUMAN;sp|Q9BQE3|TBA1C_HUMAN	47143080	15273165	13686414	26128248	10945407	20251798	0	FALSE
+56.063AANAAENDFSVSQAEMSSR	tr|H0YGW7|H0YGW7_HUMAN;tr|Q5STZ8|Q5STZ8_HUMAN;sp|Q8NE71|ABCF1_HUMAN;sp|Q8NE71-2|ABCF1_HUMAN	26001130	15428184	559102	14675541	2694023	4.91379e+06	0.000969982	FALSE
+56.063LQQALAEQQQQNNTSGK+56.063	tr|I3L2J1|I3L2J1_HUMAN;sp|Q9Y3C7|MED31_HUMAN	11985639	5590755	266794	5610617	653879	2.30434e+06	0	FALSE
+56.063GASQAGMTGYGMPR	tr|C9J5W6|C9J5W6_HUMAN;sp|P37802|TAGL2_HUMAN;sp|P37802-2|TAGL2_HUMAN;sp|Q9UI15|TAGL3_HUMAN	64511976	24504504	797839	28786106	3659758	9131249	0	FALSE
+56.063LAGTQPLEVLEAVQR	tr|Q5JRR6|Q5JRR6_HUMAN;sp|P22314|UBA1_HUMAN;sp|P22314-2|UBA1_HUMAN	67224960	37808460	4.94795e+06	37633816	7.79252e+06	15053101	0	FALSE
+56.063LLPEYPGVLSDVQEEK+56.063	sp|P00374|DYR_HUMAN;sp|P00374-2|DYR_HUMAN	9049517	5.08795e+06	1.71836e+06	3670938	1.57793e+06	1.24822e+06	0	FALSE
+56.063SESVPPVTDWAWYK+56.063	tr|R4GN83|R4GN83_HUMAN;tr|I3L192|I3L192_HUMAN;tr|A0A087WUV8|A0A087WUV8_HUMAN;tr|A0A087X2B5|A0A087X2B5_HUMAN;tr|R4GMX5|R4GMX5_HUMAN;sp|P35613|BASI_HUMAN;sp|P35613-2|BASI_HUMAN;sp|P35613-3|BASI_HUMAN;sp|P35613-4|BASI_HUMAN	23549698	11713427	639387	12863368	2.9327e+06	7.26302e+06	0	FALSE
+56.063TLAQLNPESSLFIIASK+56.063	tr|A0A0J9YXP8|A0A0J9YXP8_HUMAN;tr|A0A2R8Y6C7|A0A2R8Y6C7_HUMAN;tr|A0A0A0MTS2|A0A0A0MTS2_HUMAN;tr|A0A2U3TZU2|A0A2U3TZU2_HUMAN;tr|A0A0J9YX90|A0A0J9YX90_HUMAN;tr|A0A0J9YYH3|A0A0J9YYH3_HUMAN;tr|K7EQ48|K7EQ48_HUMAN;sp|P06744|G6PI_HUMAN;sp|P06744-2|G6PI_HUMAN	28907350	16500019	1.98521e+06	16701995	3.58678e+06	7.21402e+06	0	FALSE
+56.063IPAASAAAMNLASAR	sp|Q9UQ35|SRRM2_HUMAN	21074440	9726106	1.00318e+06	9683649	1.71075e+06	2.48284e+06	0	FALSE
+56.063LAALPENPPAIDWAYYK+56.063	tr|F5H608|F5H608_HUMAN;sp|O75947|ATP5H_HUMAN;sp|O75947-2|ATP5H_HUMAN	16948514	8340462	1163297	8789827	1.17543e+06	4479129	0	FALSE
+56.063LQQPAVLQPLASC+57.021PR	tr|H0YLG7|H0YLG7_HUMAN;sp|Q92696|PGTA_HUMAN	11574233	4741154	1.49129e+06	5.14025e+06	4474.07	2735599	0	FALSE
+56.063NTIEETGNLAEQAR	sp|P11047|LAMC1_HUMAN	12482413	7729173	1.20144e+06	7.41353e+06	888093	1.33337e+06	0	FALSE
+56.063LAATNALLNSLEFTK+56.063	tr|J3KTM9|J3KTM9_HUMAN;sp|Q14974|IMB1_HUMAN;sp|Q14974-2|IMB1_HUMAN	13586545	7.08335e+06	658208	7918034	1.36005e+06	3.45297e+06	0	FALSE
+56.063QDLMNIAGTTLSSK+56.063	tr|F5GWF6|F5GWF6_HUMAN;tr|F8VQ14|F8VQ14_HUMAN;sp|P78371|TCPB_HUMAN;sp|P78371-2|TCPB_HUMAN	13905680	37567912	38006576	50404332	17006988	1.63509e+06	0	FALSE
+56.063LC+57.021YVALDFEQEM+15.995ATAASSSSLEK+56.063	tr|I3L4N8|I3L4N8_HUMAN;tr|A0A2R8Y793|A0A2R8Y793_HUMAN;tr|A0A2R8YEA7|A0A2R8YEA7_HUMAN;sp|P63261|ACTG_HUMAN;sp|P60709|ACTB_HUMAN;sp|Q6S8J3|POTEE_HUMAN	34324868	20717720	4.86294e+06	18909838	5956127	10425860	0	FALSE
+56.063VPEIEVTVEGPNNNNPQTSAVR	sp|P78347|GTF2I_HUMAN;sp|P78347-2|GTF2I_HUMAN;sp|P78347-3|GTF2I_HUMAN;sp|P78347-4|GTF2I_HUMAN	13389746	18942268	1.87002e+06	5322055	2.6074e+06	1.53686e+06	0	FALSE
+56.063EAINVEQAFQTIAR	tr|C9J4V0|C9J4V0_HUMAN;tr|C9J8S3|C9J8S3_HUMAN;tr|C9J4S4|C9J4S4_HUMAN;sp|P51149|RAB7A_HUMAN	40185080	20141552	2.5434e+06	22595234	4451351	12476260	0	FALSE
+56.063GLVYETSVLDPDEGIR	tr|B4DJV2|B4DJV2_HUMAN;tr|H0YH82|H0YH82_HUMAN;tr|F8VZK9|F8VZK9_HUMAN;tr|F8VX68|F8VX68_HUMAN;tr|F8VPF9|F8VPF9_HUMAN;tr|F8VRP1|F8VRP1_HUMAN;tr|F8VX07|F8VX07_HUMAN;tr|F8VTT8|F8VTT8_HUMAN;tr|F8W642|F8W642_HUMAN;tr|A0A0C4DGI3|A0A0C4DGI3_HUMAN;tr|F8W1S4|F8W1S4_HUMAN;tr|F8W4S1|F8W4S1_HUMAN;tr|F8VPA1|F8VPA1_HUMAN;sp|O75390|CISY_HUMAN	5.9391e+06	2.7091e+06	255199	508377	13410649	2.11777e+06	0.000969982	FALSE
+56.063TSGVVTSC+57.021TGVLPQLSMVK+56.063	tr|H0Y8E6|H0Y8E6_HUMAN;sp|P49736|MCM2_HUMAN	6518431	3.20042e+06	1292181	2.94664e+06	1.00607e+06	1.4508e+06	0	FALSE
+56.063C+57.021IPALDSLTPANEDQK+56.063	sp|P10809|CH60_HUMAN	145510080	72172952	7946032	43452504	282008256	165034448	0	FALSE
+56.063DTPTSAGPNSFNK+56.063	sp|Q8WW12|PCNP_HUMAN;sp|Q8WW12-3|PCNP_HUMAN	22934854	13272284	771358	13379605	6628655	8125076	0	FALSE
+56.063AAGQYSTSYAQQK+56.063	tr|A0A2R8YE54|A0A2R8YE54_HUMAN;tr|E5KLJ9|E5KLJ9_HUMAN;sp|O60313-2|OPA1_HUMAN;sp|O60313-9|OPA1_HUMAN;sp|O60313-10|OPA1_HUMAN	6.47056e+06	2529196	193045	2815765	576508	1.96853e+06	0	FALSE
+56.063TGENVEDAFLEAAK+56.063	tr|X6RFL8|X6RFL8_HUMAN;sp|P61106|RAB14_HUMAN	19772544	8941089	2.90567e+06	15899965	3.11206e+06	5.84421e+06	0	FALSE
+56.063LLVVDPETDEQLQK+56.063	tr|J3QRP6|J3QRP6_HUMAN;sp|O14745|NHRF1_HUMAN	107542264	59313052	5.90372e+06	57510524	9568496	37758916	0	FALSE
+56.063FSNSIPQSQTGNSETATPTNVDLPQVIPK+56.063	sp|P46087|NOP2_HUMAN;sp|P46087-2|NOP2_HUMAN;sp|P46087-4|NOP2_HUMAN	82495320	48155268	6567304	40643364	11013184	17498014	0	FALSE
+56.063IYDPQEGAVVVLPADSQQR	sp|Q9NXF1|TEX10_HUMAN;sp|Q9NXF1-2|TEX10_HUMAN	46011408	28165686	0	24393218	4.83678e+06	8673887	0	FALSE
+56.063LIASYC+57.021NVGDIEGASK+56.063	tr|C9JCA9|C9JCA9_HUMAN;tr|B8ZZ38|B8ZZ38_HUMAN;tr|A0A0C4DG06|A0A0C4DG06_HUMAN;sp|P42704|LPPRC_HUMAN	89743664	47435500	3.9115e+06	50498548	10132632	25787756	0	FALSE
+56.063LTPITYPQGLAM+15.995AK+56.063	sp|P63000|RAC1_HUMAN;sp|P63000-2|RAC1_HUMAN	38729748	20234592	10706433	18543816	3.38757e+06	10480812	0	FALSE
+56.063LC+57.021EAIC+57.021PAQAITIEAEPR	tr|E9PKH6|E9PKH6_HUMAN;tr|E9PPW7|E9PPW7_HUMAN;sp|O00217|NDUS8_HUMAN	107306096	60780828	6.42715e+06	58951068	13606373	31051314	0	FALSE
+56.063NQGGYGGSSSSSSYGSGR	tr|F8W6I7|F8W6I7_HUMAN;tr|A0A2R8Y4L2|A0A2R8Y4L2_HUMAN;tr|H0YH80|H0YH80_HUMAN;sp|P09651|ROA1_HUMAN;sp|P09651-2|ROA1_HUMAN;sp|P09651-3|ROA1_HUMAN	7768996	3.488e+06	403855	4.95974e+06	964020	2283844	0	FALSE
+56.063VLAFTAVGDGPPSPTIQVK+56.063	tr|H0Y6Z7|H0Y6Z7_HUMAN;tr|H0Y7Z9|H0Y7Z9_HUMAN;tr|H0Y4H1|H0Y4H1_HUMAN;sp|P10586|PTPRF_HUMAN;sp|P10586-2|PTPRF_HUMAN	10598463	5722308	1.69213e+06	5.10927e+06	750215	2.40655e+06	0	FALSE
+56.063TLAQLNPESSLFIIASK+56.063	tr|A0A0J9YXP8|A0A0J9YXP8_HUMAN;tr|A0A2R8Y6C7|A0A2R8Y6C7_HUMAN;tr|A0A0A0MTS2|A0A0A0MTS2_HUMAN;tr|A0A2U3TZU2|A0A2U3TZU2_HUMAN;tr|A0A0J9YX90|A0A0J9YX90_HUMAN;tr|A0A0J9YYH3|A0A0J9YYH3_HUMAN;tr|K7EQ48|K7EQ48_HUMAN;sp|P06744|G6PI_HUMAN;sp|P06744-2|G6PI_HUMAN	14222306	7.51034e+06	815136	8.03835e+06	1.66514e+06	3.58137e+06	0	FALSE
+56.063IIQGQGVDEPLSETGFK+56.063	sp|Q9NQ88|TIGAR_HUMAN	26671050	16207745	5.10137e+06	18191970	6824894	4149627	0.000969982	FALSE
+56.063ALTVPELTQQMFDAK+56.063	tr|A0A0B4J269|A0A0B4J269_HUMAN;sp|P04350|TBB4A_HUMAN;sp|Q13509|TBB3_HUMAN;sp|Q13509-2|TBB3_HUMAN;sp|P68371|TBB4B_HUMAN	45274200	23382504	2.48973e+06	24717554	3.89759e+06	8907060	0	FALSE
+56.063STNGDTFLGGEDFDQALLR	sp|P38646|GRP75_HUMAN	8147657	6798207	2546375	1.94942e+06	2.95193e+06	1.46923e+06	0	FALSE
+56.063GATLALTQVTPQDER	sp|P43121|MUC18_HUMAN	24909288	14507711	1.17186e+06	15799543	1.73005e+06	9875984	0	FALSE
+56.063ADVDVQPYAFTTK+56.063	sp|Q9BZE4|NOG1_HUMAN;sp|Q9BZE4-2|NOG1_HUMAN;sp|Q9BZE4-3|NOG1_HUMAN	29699776	11970336	4427056	13476924	2330186	6825950	0	FALSE
+56.063LVAGEMGQNEPDQGGQR	tr|Q5H928|Q5H928_HUMAN;sp|Q99714|HCD2_HUMAN;sp|Q99714-2|HCD2_HUMAN	40917676	21397408	2.0605e+06	23385564	11009229	11727050	0	FALSE
+56.063QLC+57.021DNAGFDATNILNK+56.063	sp|Q99832|TCPH_HUMAN;sp|Q99832-2|TCPH_HUMAN;sp|Q99832-3|TCPH_HUMAN;sp|Q99832-4|TCPH_HUMAN	29560404	14437762	968351	15135329	1.64104e+06	9660471	0	FALSE
+56.063TTPEC+57.021GPTGYVEK+56.063	sp|O76095|JTB_HUMAN;sp|O76095-2|JTB_HUMAN	20957814	8526490	1.05685e+06	9849674	100824160	52816372	0	FALSE
+56.063AQQEFAAGVFSNPAVR	sp|O14828|SCAM3_HUMAN;sp|O14828-2|SCAM3_HUMAN	21688734	10823515	1.14613e+06	11998607	2.63844e+06	7082948	0	FALSE
+56.063AVFVDLEPTVIDEVR	tr|F8VRK0|F8VRK0_HUMAN;tr|F8VVB9|F8VVB9_HUMAN;tr|F8VRZ4|F8VRZ4_HUMAN;tr|F5H5D3|F5H5D3_HUMAN;tr|F8VWV9|F8VWV9_HUMAN;tr|F8VQQ4|F8VQQ4_HUMAN;tr|F8VX09|F8VX09_HUMAN;tr|A0A1W2PQM2|A0A1W2PQM2_HUMAN;tr|F8VS66|F8VS66_HUMAN;sp|P68363|TBA1B_HUMAN;sp|P68363-2|TBA1B_HUMAN;sp|Q71U36|TBA1A_HUMAN;sp|Q71U36-2|TBA1A_HUMAN;sp|Q9BQE3|TBA1C_HUMAN	47403072	24744834	3.36768e+06	25390598	5452372	10363624	0	FALSE
+56.063DLTTAGAVTQC+57.021YR	tr|M0R1A7|M0R1A7_HUMAN;tr|M0R117|M0R117_HUMAN;tr|M0R0P7|M0R0P7_HUMAN;tr|M0R3D6|M0R3D6_HUMAN;sp|Q02543|RL18A_HUMAN	93435312	45127272	9311889	34518032	0	31078328	0	FALSE
+56.063SDGGYTYDTSDLAAIK+56.063	sp|P54136|SYRC_HUMAN;sp|P54136-2|SYRC_HUMAN	21145780	9263817	4.0181e+06	13796189	4196874	0	0	FALSE
+56.063SLGPPQGEEDSVPR	sp|P78527|PRKDC_HUMAN;sp|P78527-2|PRKDC_HUMAN	6738539	3.61871e+06	0	16958564	12260280	13093461	0	FALSE
+56.063NAVITVPAYFNDSQR	sp|P38646|GRP75_HUMAN	94287072	48666940	5.22899e+06	76582328	14136874	37280892	0	FALSE
+56.063STTSTIESFAAQEK+56.063	tr|J3KPP4|J3KPP4_HUMAN;sp|O95232|LC7L3_HUMAN	23440496	20002416	16798506	10880417	5765000	5.93002e+06	0	FALSE
+56.063TPVEEVPAAIAPFQGR	sp|Q15393|SF3B3_HUMAN;sp|Q15393-3|SF3B3_HUMAN	53430936	27580910	2.39057e+06	25596450	5089870	14909541	0	FALSE
+56.063EEEEFNTGPLSVLTQSVK+56.063	tr|K7ERG4|K7ERG4_HUMAN;sp|P62316|SMD2_HUMAN;sp|P62316-2|SMD2_HUMAN	4947637	1.3202e+06	42435.9	1.46429e+06	284008	399399	0	FALSE
+56.063LQDTYNLDTDTISK+56.063	sp|P13674|P4HA1_HUMAN;sp|P13674-2|P4HA1_HUMAN;sp|P13674-3|P4HA1_HUMAN	12411460	16971644	2011214208	999538880	150439968	1001345664	0.000969982	FALSE
+56.063SVTEQGAELSNEER	tr|E9PD24|E9PD24_HUMAN;tr|E7ESK7|E7ESK7_HUMAN;tr|E5RGE1|E5RGE1_HUMAN;tr|E5RIR4|E5RIR4_HUMAN;tr|E7EVZ2|E7EVZ2_HUMAN;tr|E7EX29|E7EX29_HUMAN;sp|P63104|1433Z_HUMAN	64679016	35571048	3.89807e+06	38219916	9098640	12984289	0	FALSE
+56.063TAVDSGIPLLTNFQVTK+56.063	sp|P31327|CPSM_HUMAN;sp|P31327-2|CPSM_HUMAN;sp|P31327-3|CPSM_HUMAN	256262336	132249320	15373225	133101544	28552350	66488956	0	FALSE
+56.063AEQEEEFISNTLFK+56.063	sp|Q16204|CCDC6_HUMAN	4.08533e+06	3.41623e+06	2.28266e+06	2126951	1.31028e+06	773404	0	FALSE
+56.063DGPNALTPPPTTPEWIK+56.063	tr|Q5TC02|Q5TC02_HUMAN;tr|Q5TC01|Q5TC01_HUMAN;sp|P05023|AT1A1_HUMAN;sp|P05023-2|AT1A1_HUMAN;sp|P05023-3|AT1A1_HUMAN;sp|P05023-4|AT1A1_HUMAN	17780816	7667225	76747.4	10613764	2.09473e+06	3.27529e+06	0	FALSE
+56.063LM+15.995LPPPPLTASGVFSK+56.063	tr|M0R0Q7|M0R0Q7_HUMAN;tr|F5GZ28|F5GZ28_HUMAN;sp|P18858|DNLI1_HUMAN;sp|P18858-2|DNLI1_HUMAN;sp|P18858-3|DNLI1_HUMAN	5.33722e+06	3.51342e+06	6195.59	4.13938e+06	944464	2.15126e+06	0.000969982	FALSE
+56.063SM+15.995VPVQVQLDVPVVK+56.063	tr|C9JMJ4|C9JMJ4_HUMAN;tr|C9JW69|C9JW69_HUMAN;tr|C9JQZ4|C9JQZ4_HUMAN;tr|C9JRH2|C9JRH2_HUMAN;tr|C9J3R0|C9J3R0_HUMAN;sp|P18754|RCC1_HUMAN;sp|P18754-2|RCC1_HUMAN	7707889	3397295	527247	3124120	170373	753370	0.000969982	FALSE
+56.063C+57.021AGPTPEAELQALAR	sp|Q15050|RRS1_HUMAN	5637268	7.91324e+06	2.14373e+06	3.28861e+06	3212650	3.69875e+06	0	FALSE
+56.063TPADC+57.021PVIAIDSFR	sp|Q9BS26|ERP44_HUMAN	22598496	10677664	2.56894e+06	12218876	3.4808e+06	5883424	0.000969982	FALSE
+56.063VM+15.995TIPYQPM+15.995PASSPVIC+57.021AGGQDR	sp|Q15365|PCBP1_HUMAN	24955448	12000556	0	16732647	0	5.81994e+06	0	FALSE
+56.063NPSTVC+57.021LC+57.021PEQPTC+57.021SNADSR	tr|A0A3B3IRR6|A0A3B3IRR6_HUMAN;tr|A0A3B3ITA3|A0A3B3ITA3_HUMAN;tr|A0A3B3IT54|A0A3B3IT54_HUMAN;sp|Q9H7E9|CH033_HUMAN;sp|Q9H7E9-2|CH033_HUMAN	16113247	11514584	895366	11377542	2947916	3.56262e+06	0	FALSE
+56.063MTNTGLPGPATPAYSYAK+56.063	sp|Q9P2B4|CT2NL_HUMAN	6427599	6.22908e+06	1.55843e+06	2.81721e+06	3.35055e+06	0	0.000969982	FALSE
+56.063NQGETPTTEVPAPFFLPASLSANNTPTR	sp|Q9UJX2|CDC23_HUMAN;sp|Q9UJX2-3|CDC23_HUMAN	2.67677e+06	1.28963e+06	275390	1.32429e+06	448562	309371	0	FALSE
+56.063NTGVILANDANAER	sp|P46087|NOP2_HUMAN;sp|P46087-2|NOP2_HUMAN;sp|P46087-3|NOP2_HUMAN;sp|P46087-4|NOP2_HUMAN	25225492	11074806	1471762	3.65938e+06	0	2.19544e+06	0	FALSE
+56.063TAATSVPAYEPLDSLDR	tr|A0A087WWP4|A0A087WWP4_HUMAN;sp|Q96T37|RBM15_HUMAN;sp|Q96T37-2|RBM15_HUMAN;sp|Q96T37-3|RBM15_HUMAN;sp|Q96T37-4|RBM15_HUMAN	31054832	15996245	2.35328e+06	15228655	5713940	5.54297e+06	0	FALSE
+56.063VALVYGQMNEPPGAR	tr|F8W0P7|F8W0P7_HUMAN;tr|H0YH81|H0YH81_HUMAN;sp|P06576|ATPB_HUMAN	135879392	72047656	12381778	84257816	13602166	41743560	0	FALSE
+56.063IQVLQQQADDAEER	tr|Q5HYB6|Q5HYB6_HUMAN;tr|D6R904|D6R904_HUMAN;tr|D6RFM2|D6RFM2_HUMAN;tr|Q5VU61|Q5VU61_HUMAN;tr|A0A087WWU8|A0A087WWU8_HUMAN;sp|P06753-2|TPM3_HUMAN;sp|P06753-3|TPM3_HUMAN;sp|P06753-4|TPM3_HUMAN;sp|P06753-5|TPM3_HUMAN;sp|P06753-6|TPM3_HUMAN	4.27124e+06	2.11953e+06	347891	1.94172e+06	196068	1.52726e+06	0.000969982	FALSE
+56.063VNQIGSVTESIQAC+57.021K+56.063	sp|P13929|ENOB_HUMAN;sp|P13929-2|ENOB_HUMAN;sp|P13929-3|ENOB_HUMAN	9183348	3.44535e+06	734932	6.21767e+06	1.80833e+06	923472	0	FALSE
+56.063VNQIGSVTESLQAC+57.021K+56.063	tr|A0A2R8Y6G6|A0A2R8Y6G6_HUMAN;sp|P06733|ENOA_HUMAN;sp|P06733-2|ENOA_HUMAN	9183348	3.44535e+06	734932	6.21767e+06	1.80833e+06	923472	0	FALSE
+56.063LQPLSPVPSDIEISR	tr|B7ZM99|B7ZM99_HUMAN;tr|A0A087WVM4|A0A087WVM4_HUMAN;tr|H0Y327|H0Y327_HUMAN;sp|Q6UB35|C1TM_HUMAN	50397500	31615018	6175773	27384854	7.9827e+06	10212276	0	FALSE
+56.063LASPSGSTSSGLEVVAPEGTSAPGGGPGTLDDSATIC+57.021R	tr|M0R0K9|M0R0K9_HUMAN;sp|Q13263|TIF1B_HUMAN;sp|Q13263-2|TIF1B_HUMAN	124454752	60924632	22164434	59432332	14265018	30627614	0	FALSE
+56.063LYIGNLNESVTPADLEK+56.063	sp|Q9NZI8|IF2B1_HUMAN;sp|Q9NZI8-2|IF2B1_HUMAN	18994346	11863941	9110911	12213835	1.96863e+06	8974560	0	FALSE
+56.063ASPSPTDPVVPAVPIGPPPAGFR	sp|P11498|PYC_HUMAN	15544386	8.12404e+06	1.2546e+06	7.76383e+06	2.01285e+06	5843207	0	FALSE
+56.063ISLGLPVGAVINC+57.021ADNTGAK+56.063	tr|C9JD32|C9JD32_HUMAN;tr|B9ZVP7|B9ZVP7_HUMAN;tr|J3KT29|J3KT29_HUMAN;sp|P62829|RL23_HUMAN	13929024	5.93696e+06	368858	5.4877e+06	705343	3.11553e+06	0	FALSE
+56.063TPQAPASANLVGPR	sp|Q9UQ35|SRRM2_HUMAN	97032264	50154900	3.19853e+06	52786748	8515559	21992144	0	FALSE
+56.063TTPSYVAFTDTER	tr|A0A0G2JIW1|A0A0G2JIW1_HUMAN;tr|E9PN25|E9PN25_HUMAN;tr|E9PKE3|E9PKE3_HUMAN;tr|E9PNE6|E9PNE6_HUMAN;tr|E9PQQ4|E9PQQ4_HUMAN;tr|E9PI65|E9PI65_HUMAN;tr|E9PLF4|E9PLF4_HUMAN;tr|E9PPY6|E9PPY6_HUMAN;tr|E9PK54|E9PK54_HUMAN;tr|E9PQK7|E9PQK7_HUMAN;tr|Q53FA3|Q53FA3_HUMAN;sp|P0DMV9|HS71B_HUMAN;sp|P54652|HSP72_HUMAN;sp|P17066|HSP76_HUMAN;sp|P11142|HSP7C_HUMAN;sp|P11142-2|HSP7C_HUMAN;sp|P34931|HS71L_HUMAN;sp|P…	1566395648	842761728	139608480	836676288	181743776	357935520	0	FALSE
+56.063ADVIQATGDAIC+57.021IFR	tr|E9PMD4|E9PMD4_HUMAN;sp|Q08945|SSRP1_HUMAN	2355927	1.57834e+06	2.07461e+06	1.51603e+06	1.18729e+06	0	0	FALSE
+56.063VNQIGSVTESIQAC+57.021K+56.063	sp|P13929|ENOB_HUMAN;sp|P13929-2|ENOB_HUMAN;sp|P13929-3|ENOB_HUMAN	3984027904	1966694272	175620448	2304488192	379255168	843447488	0	FALSE
+56.063VNQIGSVTESLQAC+57.021K+56.063	tr|A0A2R8Y6G6|A0A2R8Y6G6_HUMAN;sp|P06733|ENOA_HUMAN;sp|P06733-2|ENOA_HUMAN	3984027904	1966694272	175620448	2304488192	379255168	843447488	0	FALSE
+56.063QSDVMIVAGTLTNK+56.063	tr|F5GXJ1|F5GXJ1_HUMAN;tr|F5H5N1|F5H5N1_HUMAN;tr|A0A087WXF6|A0A087WXF6_HUMAN;tr|A0A087WTI3|A0A087WTI3_HUMAN;sp|O75251|NDUS7_HUMAN;sp|O75251-2|NDUS7_HUMAN	104167008	8406813	101659080	20114370	43126824	0	0.000969982	FALSE
+56.063VC+57.021TLAIIDPGDSDIIR	tr|A0A0B4J213|A0A0B4J213_HUMAN;tr|A0A0C4DH44|A0A0C4DH44_HUMAN;tr|E5RI99|E5RI99_HUMAN;sp|P62888|RL30_HUMAN	103323992	51513360	7.43661e+06	56225784	10792468	27209788	0	FALSE
+56.063ADGGAEYATYQTK+56.063	tr|R4GN18|R4GN18_HUMAN;sp|P15529-2|MCP_HUMAN;sp|P15529-3|MCP_HUMAN;sp|P15529-4|MCP_HUMAN;sp|P15529-5|MCP_HUMAN;sp|P15529-6|MCP_HUMAN;sp|P15529-7|MCP_HUMAN;sp|P15529-16|MCP_HUMAN	26721832	12205712	1.49055e+06	12664780	1.84243e+06	7584445	0	FALSE
+56.063SC+57.021C+57.021SC+57.021C+57.021PVGC+57.021AK+56.063	sp|P80297|MT1X_HUMAN;sp|P02795|MT2_HUMAN;sp|P04732|MT1E_HUMAN;sp|Q8N339|MT1M_HUMAN;sp|P13640|MT1G_HUMAN;sp|P13640-2|MT1G_HUMAN	103500144	52560664	5195139	73059920	10802024	20025430	0	FALSE
+56.063LAQAAQSSVATITR	sp|Q9Y490|TLN1_HUMAN	48919324	25715736	1.8934e+06	27889382	4219442	11277077	0	FALSE
+56.063TVITPDPNLSIDQVGVPR	sp|P24928|RPB1_HUMAN;sp|P24928-2|RPB1_HUMAN	35177608	16594733	2.19925e+06	19858050	6358743	8413081	0	FALSE
+56.063ESESAPGDFSLSVK+56.063	tr|J3KT38|J3KT38_HUMAN;sp|P62993|GRB2_HUMAN	19029482	8725791	3.53702e+06	10593632	3104474	4297414	0	FALSE
+56.063NNAYLAQSPQLYK+56.063	sp|P14868|SYDC_HUMAN;sp|P14868-2|SYDC_HUMAN	21769808	6.09249e+06	1.67574e+06	12325565	2358510	5.59051e+06	0	FALSE
+56.063ETTDTDTADQVIASFK+56.063	tr|H7C144|H7C144_HUMAN;tr|F5GXS2|F5GXS2_HUMAN;sp|O43707|ACTN4_HUMAN;sp|O43707-2|ACTN4_HUMAN;sp|O43707-3|ACTN4_HUMAN	3.86684e+06	3298751	3.98721e+06	2.97224e+06	3.15836e+06	740464	0	FALSE
+56.063NC+57.021GC+57.021LGASPNLEQLQEENLK+56.063	tr|E5RH09|E5RH09_HUMAN;tr|E5RJM9|E5RJM9_HUMAN;sp|P54136|SYRC_HUMAN	29706812	11850034	1541576	14105932	3.40845e+06	5449980	0	FALSE
+56.063TLPPATSTEPSVILSK+56.063	tr|H0YBJ8|H0YBJ8_HUMAN;tr|E5RJU9|E5RJU9_HUMAN;sp|Q86UE4|LYRIC_HUMAN	69655048	28702450	1.21628e+06	29139064	2.15074e+06	3.48331e+06	0	FALSE
+56.063QSSYSQQPYNNQGQQQNMESSGSQGGR	tr|A0A075B7F2|A0A075B7F2_HUMAN;sp|Q92804|RBP56_HUMAN;sp|Q92804-2|RBP56_HUMAN	1.93344e+06	910105	239592	1.12922e+06	203778	298854	0	FALSE
+56.063DC+57.021DLQEDEAC+57.021YNC+57.021GR	sp|P62633-4|CNBP_HUMAN;sp|P62633-8|CNBP_HUMAN	319789	510318	0	0	0	0	0.000969982	FALSE
+56.063STGEAFVQFASQEIAEK+56.063	tr|E5RGV0|E5RGV0_HUMAN;tr|H0YB39|H0YB39_HUMAN;tr|D6RBM0|D6RBM0_HUMAN;tr|E9PCY7|E9PCY7_HUMAN;tr|G8JLB6|G8JLB6_HUMAN;tr|D6RIU0|D6RIU0_HUMAN;tr|E7EN40|E7EN40_HUMAN;tr|E5RGH4|E5RGH4_HUMAN;sp|P31943|HNRH1_HUMAN;sp|P55795|HNRH2_HUMAN	7075295	3.5923e+06	747372	4.03844e+06	1463323	2299453	0	FALSE
+56.063LVYLVENPGGYVAYSK+56.063	tr|G3V0E5|G3V0E5_HUMAN;sp|P02786|TFR1_HUMAN	40903156	23543416	4.36625e+06	17390792	3.68552e+06	12325434	0	FALSE
+56.063SAAPSTLDSSSTAPAQLGK+56.063	tr|H7C4H2|H7C4H2_HUMAN;sp|Q9Y5M8|SRPRB_HUMAN	28770000	13457736	1831514	12515457	2909976	5545556	0	FALSE
+56.063VGLTNYAAAYC+57.021TGLLLAR	tr|A0A2R8Y4A2|A0A2R8Y4A2_HUMAN;tr|A0A2R8Y6J3|A0A2R8Y6J3_HUMAN;tr|Q5T7N0|Q5T7N0_HUMAN;sp|P46777|RL5_HUMAN	8423342	3.42961e+06	558297	5.28494e+06	745919	3482637	0	FALSE
+56.063VSAGNENAC+57.021LTTK+56.063	tr|Q5VYT0|Q5VYT0_HUMAN;sp|Q5VYS8|TUT7_HUMAN;sp|Q5VYS8-2|TUT7_HUMAN;sp|Q5VYS8-3|TUT7_HUMAN;sp|Q5VYS8-6|TUT7_HUMAN	6044704	1.49687e+06	967428	2.36223e+06	547838	23320930	0.000969982	FALSE
+56.063LGPVPSSTIEPAEAQSASSDLPQVLSTSTGLTK+56.063	sp|Q5T8P6-2|RBM26_HUMAN;sp|Q5T8P6-3|RBM26_HUMAN;sp|Q5T8P6-5|RBM26_HUMAN	6.5567e+06	4.75869e+06	594185	2.8269e+06	943143	1697236	0	FALSE
+56.063ATENDIYNFFSPLNPVR	tr|H0YB39|H0YB39_HUMAN;tr|E9PCY7|E9PCY7_HUMAN;tr|G8JLB6|G8JLB6_HUMAN;tr|H0YBD7|H0YBD7_HUMAN;tr|H0YBG7|H0YBG7_HUMAN;sp|P52597|HNRPF_HUMAN;sp|P31943|HNRH1_HUMAN	7.9456e+06	4.0608e+06	488488	4613929	880855	2.34707e+06	0.000969982	FALSE
+56.063LVLPAPQISDAELQEVVK+56.063	sp|Q99459|CDC5L_HUMAN	12905626	6146749	444435	6382499	1.47406e+06	3.5503e+06	0	FALSE
+56.063NSTEC+57.021TLILTEGDSAK+56.063	sp|P11388|TOP2A_HUMAN;sp|P11388-2|TOP2A_HUMAN;sp|P11388-3|TOP2A_HUMAN;sp|P11388-4|TOP2A_HUMAN	92438448	56349516	30268472	13941736	1.31443e+06	452227	0	FALSE
+56.063AINQQTGAFVEISR	tr|M0R3J3|M0R3J3_HUMAN;tr|A0A087WTP3|A0A087WTP3_HUMAN;sp|Q92945|FUBP2_HUMAN	17750190	6006535	4.02183e+06	3.7961e+06	3178783	2.1527e+06	0	FALSE
+56.063GGVQVPAVDISSSLGGR	sp|Q09666|AHNK_HUMAN	32316844	16400330	3239382	14550403	2814782	7.48609e+06	0	FALSE
+56.063ELAQQVQQVADDYGK+56.063	tr|A0A1X7SBZ2|A0A1X7SBZ2_HUMAN;tr|A0A1W2PQ51|A0A1W2PQ51_HUMAN;sp|Q92841|DDX17_HUMAN;sp|Q92841-1|DDX17_HUMAN;sp|Q92841-2|DDX17_HUMAN;sp|Q92841-3|DDX17_HUMAN	169885184	62741752	6405943	68174672	6.59183e+06	32721896	0	FALSE
+56.063VSSGYVPPPVATPFSSK+56.063	tr|H7C3R3|H7C3R3_HUMAN;sp|Q15942|ZYX_HUMAN;sp|Q15942-2|ZYX_HUMAN	186204640	95196712	2.25336e+06	90984696	13635160	30741226	0	FALSE
+56.063LASVLGSEPSLDSEVTSK+56.063	tr|G3V180|G3V180_HUMAN;tr|G3V1D3|G3V1D3_HUMAN;tr|E9PQ14|E9PQ14_HUMAN;sp|Q9NY33|DPP3_HUMAN;sp|Q9NY33-4|DPP3_HUMAN	38190888	19249416	4.67036e+06	21386582	2.72171e+06	6731408	0	FALSE
+56.063EAEETQSTLQAEC+57.021DQYR	tr|A0A087WU26|A0A087WU26_HUMAN;tr|A0A087WVV2|A0A087WVV2_HUMAN;tr|F8W7S5|F8W7S5_HUMAN;sp|Q9P2E9|RRBP1_HUMAN;sp|Q9P2E9-3|RRBP1_HUMAN	11831351	5234922	974964	6.23214e+06	1.23266e+06	2.69059e+06	0.000969982	FALSE
+56.063TAVDSGIPLLTNFQVTK+56.063	sp|P31327|CPSM_HUMAN;sp|P31327-2|CPSM_HUMAN;sp|P31327-3|CPSM_HUMAN	236261616	134247600	15411537	136918416	26816682	67352072	0	FALSE
+56.063IAELLSPGSVDPLTR	tr|A0A2R8YD12|A0A2R8YD12_HUMAN;tr|A0A2R8Y6A7|A0A2R8Y6A7_HUMAN;tr|A0A024QZX5|A0A024QZX5_HUMAN;tr|A0A087X1N8|A0A087X1N8_HUMAN;sp|P35237|SPB6_HUMAN	12315571	4683982	0	2.59753e+06	1.64745e+06	1.8952e+06	0.000969982	FALSE
+56.063NFILDQTNVSAAAQR	tr|A0A1W2PQL0|A0A1W2PQL0_HUMAN;tr|A0A1W2PQD4|A0A1W2PQD4_HUMAN;tr|A0A1W2PP34|A0A1W2PP34_HUMAN;tr|Q5RI18|Q5RI18_HUMAN;tr|A0A1W2PQ74|A0A1W2PQ74_HUMAN;tr|A0A1W2PPH7|A0A1W2PPH7_HUMAN;tr|A0A1W2PP35|A0A1W2PP35_HUMAN;tr|A0A1W2PPL4|A0A1W2PPL4_HUMAN;tr|A0A1W2PPS1|A0A1W2PPS1_HUMAN;tr|A0A1X7SBS1|A0A1X7SBS1_HUMAN;tr|A0A1W2PRZ7|A0A1W2PRZ7_HUMAN;sp|Q00839|HNRPU_HUMAN;sp|Q00839-2|HNRPU_HUMAN	21989298	2.08166e+06	3.89182e+06	6018556	26482858	34359212	0	FALSE
+56.063EAQQALGSAAADATEAK+56.063	sp|P11047|LAMC1_HUMAN	24657576	12518777	1.818e+06	12456764	1.63413e+06	6191703	0	FALSE
+56.063EINDC+57.021IGGTVLNISK+56.063	tr|J3QSV6|J3QSV6_HUMAN;sp|O76021|RL1D1_HUMAN	22212360	11284568	1955759	7.4198e+06	1.68601e+06	5097992	0	FALSE
+56.063SSPAAFINPPIGTVTPALK+56.063	tr|F8WCX5|F8WCX5_HUMAN;tr|Q8WUT1|Q8WUT1_HUMAN;tr|F8WEE2|F8WEE2_HUMAN;tr|F6VRR5|F6VRR5_HUMAN;tr|Q6R954|Q6R954_HUMAN;sp|Q9BY77|PDIP3_HUMAN;sp|Q9BY77-2|PDIP3_HUMAN	5494191	3.63471e+06	624367	2.7352e+06	603840	2220719	0	FALSE
+56.063AFYPEEISSM+15.995VLTK+56.063	tr|A0A0G2JIW1|A0A0G2JIW1_HUMAN;tr|Q53FA3|Q53FA3_HUMAN;sp|P0DMV9|HS71B_HUMAN;sp|P34931|HS71L_HUMAN;sp|P0DMV8|HS71A_HUMAN	9311537	7635262	2.04642e+06	7050327	2.65213e+06	4408017	0	FALSE
+56.063VIAQQVQLQQQQEQVR	sp|Q01664|TFAP4_HUMAN	45110996	23628036	1.39611e+06	24392426	2.18545e+06	9544491	0.000969982	FALSE
+56.063EAPETDTSPSLWDVEFAK+56.063	sp|Q92665|RT31_HUMAN	7.92225e+06	3847542	368164	4.35195e+06	1.07568e+06	2179998	0	FALSE
+56.063TGLIDYNQLALTAR	tr|G3V5L0|G3V5L0_HUMAN;tr|G3V2Y4|G3V2Y4_HUMAN;sp|P34897|GLYM_HUMAN;sp|P34897-3|GLYM_HUMAN	36964004	12823213	2.65516e+06	15532472	20535208	7.57819e+06	0	FALSE
+56.063INSDDSNLYLTASK+56.063	tr|C9JY26|C9JY26_HUMAN;sp|Q9BZG1|RAB34_HUMAN;sp|Q9BZG1-2|RAB34_HUMAN;sp|Q9BZG1-4|RAB34_HUMAN	17877038	8741773	544821	8395751	1.68836e+06	4.18108e+06	0	FALSE
+56.063VAPEM+15.995FFSPQVFEQPGPSIPR	sp|Q9H568|ACTL8_HUMAN	7825983	1.70713e+06	541613	2528996	0	988288	0	FALSE
+56.063TDAVLPLTVAEVQK+56.063	tr|H3BUX1|H3BUX1_HUMAN;tr|H3BMA1|H3BMA1_HUMAN;sp|Q13421|MSLN_HUMAN;sp|Q13421-3|MSLN_HUMAN;sp|Q13421-2|MSLN_HUMAN;sp|Q13421-4|MSLN_HUMAN	20238414	7.868e+06	6991069	1.21288e+06	6304531	0	0	FALSE
+56.063GSYGDLGGPIITTQVTIPK+56.063	tr|Q5T6W2|Q5T6W2_HUMAN;tr|S4R359|S4R359_HUMAN;sp|P61978|HNRPK_HUMAN;sp|P61978-2|HNRPK_HUMAN;sp|P61978-3|HNRPK_HUMAN	1072898240	502654496	58834316	513276064	106119752	253060352	0	FALSE
+56.063GDFDENLNYPEQK+56.063	tr|F8VXU5|F8VXU5_HUMAN;sp|Q9UBQ0|VPS29_HUMAN;sp|Q9UBQ0-2|VPS29_HUMAN	24213862	7057749	8352606	12849705	1.8876e+06	5088154	0	FALSE
+56.063TQETPSAQMEGFLNR	tr|A0A087WUZ3|A0A087WUZ3_HUMAN;sp|Q01082|SPTB2_HUMAN	32693086	26801144	9806558	20166042	15188396	3.32116e+06	0	FALSE
+56.063AIEEGIPAFTC+57.021EEYVK+56.063	tr|G3V1J5|G3V1J5_HUMAN;tr|F2Z2C0|F2Z2C0_HUMAN;sp|Q9Y2L1|RRP44_HUMAN;sp|Q9Y2L1-2|RRP44_HUMAN	20627284	8.25245e+06	6.58112e+06	14751403	4.96647e+06	10669859	0.000969982	FALSE
+56.063LLEGDGGPNTGGM+15.995GAYC+57.021PAPQVSNDLLLK+56.063	tr|F8WD69|F8WD69_HUMAN;sp|P22102|PUR2_HUMAN;sp|P22102-2|PUR2_HUMAN	1.91259e+06	3376138	1.56318e+06	586498	878037	0	0.000969982	FALSE
+56.063GTSFDAAATSGGSASSEK+56.063	tr|H0YL12|H0YL12_HUMAN;tr|H0YKF0|H0YKF0_HUMAN;tr|H0YK49|H0YK49_HUMAN;tr|H0YNX6|H0YNX6_HUMAN;tr|H0YLU7|H0YLU7_HUMAN;sp|P13804|ETFA_HUMAN;sp|P13804-2|ETFA_HUMAN	46968040	19355930	1868316	24681628	6634022	16181645	0	FALSE
+56.063ATTPVIM+15.995VGPGTGVAPFIGFIQER	tr|E7EMD0|E7EMD0_HUMAN;tr|H0Y4R2|H0Y4R2_HUMAN;sp|P16435|NCPR_HUMAN	801841	335312	267528	441025	0	373972	0	FALSE
+56.063FSPNSSNPIIVSC+57.021GWDK+56.063	tr|D6RHH4|D6RHH4_HUMAN;tr|D6RAC2|D6RAC2_HUMAN;tr|J3KPE3|J3KPE3_HUMAN;tr|H0YAF8|H0YAF8_HUMAN;tr|H0Y8R5|H0Y8R5_HUMAN;tr|D6RFX4|D6RFX4_HUMAN;tr|H0Y8W2|H0Y8W2_HUMAN;tr|H0YAM7|H0YAM7_HUMAN;tr|D6R9L0|D6R9L0_HUMAN;tr|D6REE5|D6REE5_HUMAN;tr|D6R9Z1|D6R9Z1_HUMAN;tr|D6RBD0|D6RBD0_HUMAN;sp|P63244|RACK1_HUMAN	11499532	6.9922e+06	5.45993e+06	12192827	1.91854e+06	4.12681e+06	0.000969982	FALSE
+56.063ASAGPQPLLVQSC+57.021K+56.063	sp|Q9Y490|TLN1_HUMAN	67446608	29173294	0	27444180	2299893	2.5332e+06	0	FALSE
+56.063TC+57.021SPASLSQASADLEATLR	tr|A0A3B3IUA7|A0A3B3IUA7_HUMAN;sp|Q14258|TRI25_HUMAN	27647048	13051843	2553216	17227596	3.95823e+06	5.21568e+06	0.000969982	FALSE
+56.063LASPSGSTSSGLEVVAPEGTSAPGGGPGTLDDSATIC+57.021R	tr|M0R0K9|M0R0K9_HUMAN;sp|Q13263|TIF1B_HUMAN;sp|Q13263-2|TIF1B_HUMAN	125144184	60804764	23349972	59633876	14183646	30820042	0	FALSE
+56.063VAPEEHPVLLTEAPLNPK+56.063	tr|G5E9R0|G5E9R0_HUMAN;tr|I3L4N8|I3L4N8_HUMAN;tr|A0A2R8YGF8|A0A2R8YGF8_HUMAN;tr|K7EM38|K7EM38_HUMAN;tr|I3L3R2|I3L3R2_HUMAN;tr|I3L1U9|I3L1U9_HUMAN;tr|I3L3I0|I3L3I0_HUMAN;tr|E7EVS6|E7EVS6_HUMAN;tr|J3KT65|J3KT65_HUMAN;tr|A0A2R8Y793|A0A2R8Y793_HUMAN;sp|P63261|ACTG_HUMAN;sp|P60709|ACTB_HUMAN	53164772	29870606	22097974	42232944	5.82861e+06	17923934	0	FALSE
+56.063LSVEEAVAAGVVGGEIQEK+56.063	tr|A0A075B730|A0A075B730_HUMAN;sp|P58107|EPIPL_HUMAN	17146812	12299044	2.23298e+06	12191030	2.92815e+06	10148175	0	FALSE
+56.063ILATPPQEDAPSVDIANIR	tr|A0A0B4J1R6|A0A0B4J1R6_HUMAN;tr|E9PFF2|E9PFF2_HUMAN;sp|P29401|TKT_HUMAN;sp|P29401-2|TKT_HUMAN	131686384	109290720	75297600	38128108	30526414	12871182	0	FALSE
+56.063GPADSLSTAAGAAELSAEGAGK+56.063	sp|Q7Z5L9|I2BP2_HUMAN;sp|Q7Z5L9-2|I2BP2_HUMAN	26183824	9060838	1.30282e+06	9133648	912113	2.0436e+06	0	FALSE
+56.063LSGSNPYTTVTPQIINSK+56.063	tr|H7C144|H7C144_HUMAN;tr|F5GXS2|F5GXS2_HUMAN;sp|O43707|ACTN4_HUMAN;sp|O43707-2|ACTN4_HUMAN;sp|O43707-3|ACTN4_HUMAN	238715712	116561592	16662781	123087408	21867132	69731704	0	FALSE
+56.063IINEPTAAAIAYGLDR	tr|A0A0G2JIW1|A0A0G2JIW1_HUMAN;sp|P0DMV9|HS71B_HUMAN;sp|P17066|HSP76_HUMAN;sp|P0DMV8|HS71A_HUMAN;sp|P0DMV8-2|HS71A_HUMAN	404069760	215793760	23043458	215154720	42847024	99073600	0	FALSE
+56.063GSYGDLGGPIITTQVTIPK+56.063	tr|Q5T6W2|Q5T6W2_HUMAN;tr|S4R359|S4R359_HUMAN;sp|P61978|HNRPK_HUMAN;sp|P61978-2|HNRPK_HUMAN;sp|P61978-3|HNRPK_HUMAN	1075966080	517859232	62191540	504944736	105240784	251472640	0	FALSE
+56.063LGLPPLTPEQQEALQK+56.063	tr|A0A0J9YXJ8|A0A0J9YXJ8_HUMAN;tr|E9PQ56|E9PQ56_HUMAN;tr|A0A0J9YWM1|A0A0J9YWM1_HUMAN;tr|H0YEM1|H0YEM1_HUMAN;tr|A0A0J9YVR6|A0A0J9YVR6_HUMAN;tr|A0A0J9YXX5|A0A0J9YXX5_HUMAN;tr|A0A0J9YYL3|A0A0J9YYL3_HUMAN;tr|A0A0J9YVP6|A0A0J9YVP6_HUMAN;tr|E9PL19|E9PL19_HUMAN;tr|E9PN18|E9PN18_HUMAN;tr|E9PMU7|E9PMU7_HUMAN;sp|Q9UHX1|PUF60_HUMAN;sp|Q9UHX1-2|PUF60_HUMAN;sp|Q9UHX1-3|PUF60_HUMAN;sp|Q9UHX1-4|PUF60_HUMAN;sp|Q…	86223976	254166528	64923136	100751312	16516617	43464120	0	FALSE
+56.063ILDNTSEPQPGEAR	sp|P50416|CPT1A_HUMAN;sp|P50416-2|CPT1A_HUMAN	55434460	28033460	5358480	30623622	6588836	12300773	0	FALSE
+56.063LLPIDGANDLFFQPPPLTPTSK+56.063	sp|O60502|OGA_HUMAN;sp|O60502-4|OGA_HUMAN	2.47239e+06	1.2071e+06	152365	1.30355e+06	131080	497322	0	FALSE
+56.063LYPAVDEQETPLPR	sp|Q96S59|RANB9_HUMAN	18905586	9269610	638266	8867566	2058459	3245331	0	FALSE
+56.063ATEPPSPDAGELSLASR	sp|Q8IYB8|SUV3_HUMAN	52599592	29327160	1.78485e+06	27362340	14052059	28879248	0	FALSE
+56.063EAGDVC+57.021YADVYR	tr|J3KTL2|J3KTL2_HUMAN;tr|J3KSR8|J3KSR8_HUMAN;sp|Q07955|SRSF1_HUMAN;sp|Q07955-2|SRSF1_HUMAN;sp|Q07955-3|SRSF1_HUMAN	24327582	11404822	195378	11927574	1.52003e+06	6749810	0	FALSE
+56.063VSSVPNTSQSYAK+56.063	sp|Q15018|ABRX2_HUMAN	40185544	18347766	1.15135e+06	19505890	3.53833e+06	8.13722e+06	0	FALSE
+56.063VLAGETLSVNDPPDVLDR	tr|K7EQR9|K7EQR9_HUMAN;tr|K7EKJ9|K7EKJ9_HUMAN;sp|Q12906|ILF3_HUMAN;sp|Q12906-2|ILF3_HUMAN;sp|Q12906-3|ILF3_HUMAN;sp|Q12906-4|ILF3_HUMAN;sp|Q12906-5|ILF3_HUMAN;sp|Q12906-6|ILF3_HUMAN;sp|Q12906-7|ILF3_HUMAN	12531331	5.80731e+06	628864	5408108	1.96982e+06	2.53233e+06	0	FALSE
+56.063IVLTNPVC+57.021TEVGEK+56.063	sp|Q2VIR3|IF2GL_HUMAN;sp|P41091|IF2G_HUMAN	275123872	133668072	9886194	138562400	24111008	65473084	0	FALSE
+56.063AVNTLNEALEFAK+56.063	sp|P31327|CPSM_HUMAN;sp|P31327-2|CPSM_HUMAN;sp|P31327-3|CPSM_HUMAN	160572592	81963952	7105675	80625752	14329510	40990512	0	FALSE
+56.063ALPSQGLSSSAVLEK+56.063	tr|H0Y3V8|H0Y3V8_HUMAN;tr|H7BXL7|H7BXL7_HUMAN;sp|O95470|SGPL1_HUMAN	14473905	6.67575e+06	110865	7.69394e+06	2.10059e+06	3.41673e+06	0	FALSE
+56.063ASYVAPLTAQPATYR	sp|Q96PK6|RBM14_HUMAN	53144036	31587342	129879	28189080	1.68805e+06	12318371	0.000969982	FALSE
+56.063VLVSPTNPPGATSSC+57.021QK+56.063	sp|O60763|USO1_HUMAN;sp|O60763-2|USO1_HUMAN	56904100	27919352	2189791	32768870	4.16123e+06	14478427	0	FALSE
+56.063EC+57.021SLQVPEDELVSTLK+56.063	tr|F8WB70|F8WB70_HUMAN;tr|Q5HY81|Q5HY81_HUMAN;sp|P11441|UBL4A_HUMAN	47426076	23588800	2.37122e+06	25158266	3.84609e+06	20844338	0	FALSE
+56.063NTFSSGSDLNAVK+56.063	tr|J3KP84|J3KP84_HUMAN;tr|E9PJS8|E9PJS8_HUMAN;tr|F2Z2D6|F2Z2D6_HUMAN;tr|H0Y5L2|H0Y5L2_HUMAN;tr|E9PLY6|E9PLY6_HUMAN;tr|H0Y525|H0Y525_HUMAN;tr|E9PPG7|E9PPG7_HUMAN;tr|E9PRU6|E9PRU6_HUMAN;sp|Q9NTX5|ECHD1_HUMAN;sp|Q9NTX5-2|ECHD1_HUMAN;sp|Q9NTX5-3|ECHD1_HUMAN;sp|Q9NTX5-4|ECHD1_HUMAN;sp|Q9NTX5-5|ECHD1_HUMAN;sp|Q9NTX5-6|ECHD1_HUMAN	12851027	18311840	13450165	6.64844e+06	0	322343	0	FALSE
+56.063GSPNTASAEATLPR	sp|Q6PJG6|BRAT1_HUMAN;sp|Q6PJG6-3|BRAT1_HUMAN	28252646	16693878	3.88257e+06	14088031	3.2777e+06	5.23338e+06	0	FALSE
+56.063VDINAPDVEVQGK+56.063	sp|Q09666|AHNK_HUMAN	29612404	23217692	895560	28906066	4.88763e+06	14372252	0	FALSE
+56.063EAINVEQAFQTIAR	tr|C9J4V0|C9J4V0_HUMAN;tr|C9J8S3|C9J8S3_HUMAN;tr|C9J4S4|C9J4S4_HUMAN;sp|P51149|RAB7A_HUMAN	29372578	12837669	1726053	15535048	2.93259e+06	8724930	0	FALSE
+56.063TVLC+57.021GTC+57.021GQPADK+56.063	tr|A0A0C4DGC5|A0A0C4DGC5_HUMAN;sp|P02545|LMNA_HUMAN;sp|P02545-3|LMNA_HUMAN;sp|P02545-4|LMNA_HUMAN;sp|P02545-5|LMNA_HUMAN;sp|P02545-6|LMNA_HUMAN	31880946	15187295	495009	20811484	3984658	9900299	0	FALSE
+56.063GDATVSYEDPPTAK+56.063	tr|A0A0D9SFL3|A0A0D9SFL3_HUMAN;tr|H7BY36|H7BY36_HUMAN;tr|B0QYK0|B0QYK0_HUMAN;tr|C9JGE3|C9JGE3_HUMAN;sp|Q01844|EWS_HUMAN;sp|Q01844-2|EWS_HUMAN;sp|Q01844-3|EWS_HUMAN;sp|Q01844-5|EWS_HUMAN;sp|Q01844-6|EWS_HUMAN	23476132	11049094	909289	8706526	1.07478e+06	289856	0	FALSE
+56.063VM+15.995QPLVQQPILPVVK+56.063	sp|Q5T8P6|RBM26_HUMAN;sp|Q5T8P6-2|RBM26_HUMAN	6.21883e+06	3.03154e+06	137470	2.87481e+06	451870	1.03842e+06	0	FALSE
+56.063TQPMTAQAASYR	sp|Q96PK6|RBM14_HUMAN	96966200	51496572	7.45385e+06	56741372	10442373	23040788	0	FALSE
+56.063VNQIGSVTESIQAC+57.021K+56.063	sp|P13929|ENOB_HUMAN;sp|P13929-2|ENOB_HUMAN;sp|P13929-3|ENOB_HUMAN	57701020	40822232	4270176	28965016	8797244	15674108	0	FALSE
+56.063VNQIGSVTESLQAC+57.021K+56.063	tr|A0A2R8Y6G6|A0A2R8Y6G6_HUMAN;sp|P06733|ENOA_HUMAN;sp|P06733-2|ENOA_HUMAN	57701020	40822232	4270176	28965016	8797244	15674108	0	FALSE
+56.063GGSVLVTC+57.021STSC+57.021DQPK+56.063	tr|K7EKL8|K7EKL8_HUMAN;sp|P05362|ICAM1_HUMAN	68314720	33220526	2.56423e+06	43299668	2.90284e+06	13644462	0.000969982	FALSE
+56.063VVVQVLAEEPEAVLK+56.063	tr|A0A0U1RQF0|A0A0U1RQF0_HUMAN;sp|P49327|FAS_HUMAN	81056144	38555180	3854132	40384064	7287146	30771328	0	FALSE
+56.063AGGSASAM+15.995LQPLLDNQVGFK+56.063	sp|P20618|PSB1_HUMAN	25123516	13530119	1.75248e+06	12935931	4453202	7687123	0	FALSE
+56.063NSSYFVEWIPNNVK+56.063	tr|Q5ST81|Q5ST81_HUMAN;tr|Q5JP53|Q5JP53_HUMAN;tr|K7ESM5|K7ESM5_HUMAN;tr|A0A0B4J269|A0A0B4J269_HUMAN;sp|Q9BUF5|TBB6_HUMAN;sp|P04350|TBB4A_HUMAN;sp|P07437|TBB5_HUMAN;sp|Q13885|TBB2A_HUMAN;sp|Q13509|TBB3_HUMAN;sp|Q13509-2|TBB3_HUMAN;sp|P68371|TBB4B_HUMAN;sp|Q9BVA1|TBB2B_HUMAN	0	7.92746e+06	1.93762e+06	5.68269e+06	2.48525e+06	2.09891e+06	0	FALSE
+56.063NQVALNPQNTVFDAK+56.063	tr|A0A0G2JIW1|A0A0G2JIW1_HUMAN;sp|P0DMV9|HS71B_HUMAN;sp|P0DMV8|HS71A_HUMAN;sp|P0DMV8-2|HS71A_HUMAN	394251584	199735680	14502565	217334416	37733172	113990320	0	FALSE
+56.063SGASGASAAPAASAAAALAPSATR	sp|Q7Z7K6|CENPV_HUMAN	64298608	32620646	30012678	35838232	10380158	18525592	0	FALSE
+56.063NC+57.021DYQQEADNSC+57.021IYVNK+56.063	tr|K7EKS1|K7EKS1_HUMAN;sp|P36954|RPB9_HUMAN	17249534	6.04688e+06	560857	5.11676e+06	2109844	2.0869e+06	0	FALSE
+56.063TVTAAGAENIQQK+56.063	sp|Q29RF7|PDS5A_HUMAN	15224842	12268858	693470	11172655	1.03898e+06	7.13601e+06	0	FALSE
+56.063ALADDDFLTVTGK+56.063	tr|A0A3B3IU45|A0A3B3IU45_HUMAN;tr|E5RG31|E5RG31_HUMAN;tr|A0A3B3IT92|A0A3B3IT92_HUMAN;tr|A0A3B3IS57|A0A3B3IS57_HUMAN;tr|A0A3B3ITP6|A0A3B3ITP6_HUMAN;sp|P33991|MCM4_HUMAN	10425661	3.19258e+06	874053	8928356	1.50726e+06	4.90405e+06	0.000969982	FALSE
+56.063TFAPEEISAMVLTK+56.063	sp|P11021|BIP_HUMAN	7347819	3.99397e+06	335964	4.50907e+06	422991	1.92587e+06	0	FALSE
+56.063VMTIPYQPM+15.995PASSPVIC+57.021AGGQDR	sp|Q15365|PCBP1_HUMAN	25918622	10823662	2958147	11548242	2988782	4088570	0	FALSE
+56.063QQPNPGNELC+57.021YK+56.063	sp|Q14166|TTL12_HUMAN	27517420	12392820	1.54423e+06	15733374	3342249	2644062	0	FALSE
+56.063GQESAGIVTSDGSSVPTFK+56.063	tr|D6RCC8|D6RCC8_HUMAN;tr|D6RE15|D6RE15_HUMAN;sp|Q06203|PUR1_HUMAN	50353896	24153530	2.30788e+06	20452888	4930095	11854674	0	FALSE
+56.063VGVPTVDLDAQGR	sp|O60306|AQR_HUMAN	19663988	8817653	956101	10715120	6817936	9190054	0	FALSE
+56.063LQAFSAAIESC+57.021NK+56.063	sp|Q02790|FKBP4_HUMAN	34349220	8.1054e+06	21552782	42674096	10882068	6.25488e+06	0	FALSE
+56.063TTSVSLTIGSSSPK+56.063	tr|D6RBB1|D6RBB1_HUMAN;tr|D6RBH5|D6RBH5_HUMAN;tr|H0Y952|H0Y952_HUMAN;tr|D6R9Z5|D6R9Z5_HUMAN;sp|Q8WX93|PALLD_HUMAN;sp|Q8WX93-2|PALLD_HUMAN;sp|Q8WX93-3|PALLD_HUMAN;sp|Q8WX93-5|PALLD_HUMAN;sp|Q8WX93-6|PALLD_HUMAN;sp|Q8WX93-8|PALLD_HUMAN;sp|Q8WX93-9|PALLD_HUMAN	20215268	9534380	1.05311e+06	6.08144e+06	1.99686e+06	1.40346e+06	0	FALSE
+56.063LQPALPPEAQSVPELEEVAR	sp|Q8WUF5|IASPP_HUMAN	19552950	8410109	4.27967e+06	12229813	6.68764e+06	8817163	0	FALSE
+56.063VMPNAIVQSVGVSSGK+56.063	tr|E9PMA0|E9PMA0_HUMAN;sp|O95831|AIFM1_HUMAN;sp|O95831-2|AIFM1_HUMAN;sp|O95831-3|AIFM1_HUMAN;sp|O95831-5|AIFM1_HUMAN	20145544	9764323	4.64538e+06	8458824	42937.9	4102376	0	FALSE
+56.063IAPQYYDMSNFPQC+57.021EAK+56.063	sp|O43143|DHX15_HUMAN	40635700	18732540	5552304	18993816	6.92714e+06	16443067	0	FALSE
+56.063TALPAQSAATLPAR	tr|A0A087WUZ3|A0A087WUZ3_HUMAN;sp|Q01082|SPTB2_HUMAN	318417984	171156432	22206306	196045056	35675304	80248232	0	FALSE
+56.063VVYASATGASEPR	tr|K7ES28|K7ES28_HUMAN;sp|Q9Y2G9|SBNO2_HUMAN;sp|Q9Y2G9-3|SBNO2_HUMAN;sp|A3KN83|SBNO1_HUMAN;sp|A3KN83-2|SBNO1_HUMAN;sp|A3KN83-3|SBNO1_HUMAN;sp|A3KN83-4|SBNO1_HUMAN	26420088	14220236	2.01567e+06	33304916	3.52817e+06	9427422	0.000969982	FALSE
+56.063DALNQATSQVESK+56.063	tr|A0A087WVV2|A0A087WVV2_HUMAN;tr|F8W7S5|F8W7S5_HUMAN;sp|Q9P2E9|RRBP1_HUMAN;sp|Q9P2E9-3|RRBP1_HUMAN	47953856	21782784	2100219	22689220	3.18991e+06	14013073	0	FALSE
+56.063VNNSTM+15.995LGASGDYADFQYLK+56.063	sp|P28070|PSB4_HUMAN	197246704	75847104	64721872	20140470	2839571	5509888	0	FALSE
+56.063VIAPNPAQLQGQR	tr|A0A0U1RRM1|A0A0U1RRM1_HUMAN;tr|A0A0U1RR30|A0A0U1RR30_HUMAN;sp|Q8WXI9|P66B_HUMAN	49189184	26554326	4.35057e+06	24179496	5035380	11925212	0	FALSE
+56.063ILPTLEAVAALGNK+56.063	tr|X6R6Z1|X6R6Z1_HUMAN;tr|B4DY09|B4DY09_HUMAN;sp|Q12905|ILF2_HUMAN	20027400	9855581	897593	10851557	1.90536e+06	6.00868e+06	0	FALSE
+56.063LPAVSSVAC+57.021GASVGYAVTK+56.063	sp|P18754|RCC1_HUMAN;sp|P18754-2|RCC1_HUMAN	128775520	67590824	8471976	78625376	10248236	24500302	0	FALSE
+56.063ASVSVTAEDEGTQR	tr|E7ESS4|E7ESS4_HUMAN;sp|P05362|ICAM1_HUMAN	15674167	8386314	1.37747e+06	8.15573e+06	6.88289e+06	12621676	0.000897817	FALSE
+56.063ASNLENSTYDLYTIPK+56.063	tr|A0A3B3IS84|A0A3B3IS84_HUMAN;tr|A0A3B3IT15|A0A3B3IT15_HUMAN;tr|A0A3B3ISK1|A0A3B3ISK1_HUMAN;tr|A0A3B3IU89|A0A3B3IU89_HUMAN;tr|A0A3B3ISC6|A0A3B3ISC6_HUMAN;tr|A0A3B3ITV3|A0A3B3ITV3_HUMAN;sp|P53621|COPA_HUMAN;sp|P53621-2|COPA_HUMAN	35175772	19367662	4.31061e+06	28204470	4377730	10435985	0	FALSE
+56.063AAELIANSLATAGDGLIELR	tr|C9JW96|C9JW96_HUMAN;sp|P35232|PHB_HUMAN	1.23577e+06	387231	1.76907e+06	0	10854342	20708474	0.000969982	FALSE
+56.063LGANSLLDLVVFGR	tr|A0A087X1I3|A0A087X1I3_HUMAN;tr|D6RFM5|D6RFM5_HUMAN;tr|H0Y8X1|H0Y8X1_HUMAN;sp|P31040|SDHA_HUMAN;sp|P31040-2|SDHA_HUMAN;sp|P31040-3|SDHA_HUMAN	673286	335955	90.8844	299817	18050.3	174078	0	FALSE
+56.063ISLGLPVGAVINC+57.021ADNTGAK+56.063	tr|C9JD32|C9JD32_HUMAN;tr|B9ZVP7|B9ZVP7_HUMAN;tr|J3KT29|J3KT29_HUMAN;sp|P62829|RL23_HUMAN	27338110	22349064	5.46882e+06	13296526	6.36175e+06	8.08738e+06	0	FALSE
+56.063AYVDDTPAEQM+15.995K+56.063	tr|V9GYZ6|V9GYZ6_HUMAN;sp|P07814|SYEP_HUMAN	14835289	5.77509e+06	3.70666e+06	7492194	725568	1.56734e+06	0	FALSE
+56.063VEEAEPEEFVVEK+56.063	tr|S4R2Y4|S4R2Y4_HUMAN;tr|C9JMM0|C9JMM0_HUMAN;tr|B8ZZ43|B8ZZ43_HUMAN;sp|Q13185|CBX3_HUMAN	34506096	14771756	1.50988e+06	11646936	2.17064e+06	5.51119e+06	0	FALSE
+56.063ESTGAQVQVAGDM+15.995LPNSTER	tr|E9PFP8|E9PFP8_HUMAN;tr|F8VZX2|F8VZX2_HUMAN;tr|F8VXH9|F8VXH9_HUMAN;tr|F8W0G4|F8W0G4_HUMAN;tr|J3QT27|J3QT27_HUMAN;tr|H3BRU6|H3BRU6_HUMAN;sp|Q15366|PCBP2_HUMAN;sp|Q15366-2|PCBP2_HUMAN;sp|Q15366-3|PCBP2_HUMAN;sp|Q15366-4|PCBP2_HUMAN;sp|Q15366-5|PCBP2_HUMAN;sp|Q15366-6|PCBP2_HUMAN;sp|Q15366-7|PCBP2_HUMAN;sp|Q15366-8|PCBP2_HUMAN;sp|Q15365|PCBP1_HUMAN;sp|P57721|PCBP3_HUMAN;sp|P57721-2|PCBP3_HUMAN;sp|…	118738904	58381524	7613469	66725112	7200597	26353084	0.000969982	FALSE
+56.063TIGGGDDSFNTFFSETGAGK+56.063	tr|F8VRK0|F8VRK0_HUMAN;tr|F8VVB9|F8VVB9_HUMAN;tr|F8VRZ4|F8VRZ4_HUMAN;tr|F8W0F6|F8W0F6_HUMAN;tr|F5H5D3|F5H5D3_HUMAN;tr|F8VWV9|F8VWV9_HUMAN;tr|F8VQQ4|F8VQQ4_HUMAN;tr|F8VX09|F8VX09_HUMAN;tr|A0A1W2PQM2|A0A1W2PQM2_HUMAN;tr|F8VXZ7|F8VXZ7_HUMAN;tr|F8VS66|F8VS66_HUMAN;sp|P68363|TBA1B_HUMAN;sp|P68363-2|TBA1B_HUMAN;sp|P0DPH7|TBA3C_HUMAN;sp|P0DPH7-2|TBA3C_HUMAN;sp|P0DPH8|TBA3D_HUMAN;sp|Q6PEY2|TBA3E_HUMAN;sp…	5883812	1.91632e+06	1.1962e+06	3.43162e+06	2246131	2729783	0	FALSE
+56.063NQLTSNPENTVFDAK+56.063	sp|P11021|BIP_HUMAN	194788272	96505600	26753004	165452256	18702690	59557676	0	FALSE
+56.063STGEAFVQFASQEIAEK+56.063	tr|E5RGV0|E5RGV0_HUMAN;tr|H0YB39|H0YB39_HUMAN;tr|D6RBM0|D6RBM0_HUMAN;tr|E9PCY7|E9PCY7_HUMAN;tr|G8JLB6|G8JLB6_HUMAN;tr|D6RIU0|D6RIU0_HUMAN;tr|E7EN40|E7EN40_HUMAN;tr|E5RGH4|E5RGH4_HUMAN;sp|P31943|HNRH1_HUMAN;sp|P55795|HNRH2_HUMAN	30512772	15739818	2.07634e+06	18843044	3.8084e+06	8628012	0	FALSE
+56.063VM+15.995TIPYQPM+15.995PASSPVIC+57.021AGGQDR	sp|Q15365|PCBP1_HUMAN	23194916	10750114	350258	13747973	0	5.48857e+06	0	FALSE
+56.063AVDPTSGQLYGLAR	sp|Q8TEM1|PO210_HUMAN	23307820	26747376	2.96962e+06	25833186	0	18684172	0.000969982	FALSE
+56.063SVSSPTSSNTPTPTK+56.063	sp|Q5M775|CYTSB_HUMAN;sp|Q5M775-2|CYTSB_HUMAN;sp|Q5M775-3|CYTSB_HUMAN;sp|Q5M775-4|CYTSB_HUMAN;sp|Q5M775-5|CYTSB_HUMAN	6.4048e+06	2.62457e+06	78562.1	2.86738e+06	489139	1.70136e+06	0	FALSE
+56.063AGYPQYVSEILEK+56.063	tr|C9JCA9|C9JCA9_HUMAN;tr|B8ZZ38|B8ZZ38_HUMAN;tr|A0A0C4DG06|A0A0C4DG06_HUMAN;sp|P42704|LPPRC_HUMAN	23592652	12466788	1.12272e+06	13911928	2782922	7.43268e+06	0	FALSE
+56.063AIVAIENPADVSVISSR	tr|F8WD59|F8WD59_HUMAN;tr|A0A0C4DG17|A0A0C4DG17_HUMAN;tr|C9J9K3|C9J9K3_HUMAN;sp|P08865|RSSA_HUMAN	304219648	160211008	18128354	169918800	32824578	72841632	0	FALSE
+56.063FETFC+57.021LDPSLVTK+56.063	sp|Q9UHB9|SRP68_HUMAN;sp|Q9UHB9-2|SRP68_HUMAN;sp|Q9UHB9-3|SRP68_HUMAN;sp|Q9UHB9-4|SRP68_HUMAN	2.45009e+06	1.69177e+06	795158	1.31322e+06	833500	918889	0	FALSE
+56.063VETGVLK+56.063PGM+15.995VVTFAPVNVTTEVK+56.063	tr|A0A087WVQ9|A0A087WVQ9_HUMAN;sp|Q5VTE0|EF1A3_HUMAN;sp|P68104|EF1A1_HUMAN;sp|P68104-2|EF1A1_HUMAN	2397215	0	0	1.20627e+06	278780	709032	0	FALSE
+56.063AIEINPDSAQPYK+56.063	tr|Q3KNR6|Q3KNR6_HUMAN;tr|H7C3I1|H7C3I1_HUMAN;tr|F6VDH7|F6VDH7_HUMAN;sp|P50502|F10A1_HUMAN;sp|Q8NFI4|F10A5_HUMAN;sp|Q8IZP2|ST134_HUMAN	79365664	38389456	11757868	35366888	2346795	15234639	0	FALSE
+56.063TSPTPPESATTVK+56.063	tr|J3KSG2|J3KSG2_HUMAN;sp|Q5M775|CYTSB_HUMAN;sp|Q5M775-4|CYTSB_HUMAN	15775316	8793996	1.67117e+06	7983603	5266601	3.5609e+06	0	FALSE
+56.063AILVDLEPGTM+15.995DSVR	tr|G3V2N6|G3V2N6_HUMAN;tr|Q5JP53|Q5JP53_HUMAN;tr|G3V2R8|G3V2R8_HUMAN;tr|G3V5W4|G3V5W4_HUMAN;tr|A0A0B4J269|A0A0B4J269_HUMAN;tr|G3V3R4|G3V3R4_HUMAN;sp|P07437|TBB5_HUMAN;sp|Q13885|TBB2A_HUMAN;sp|Q13509|TBB3_HUMAN;sp|Q9BVA1|TBB2B_HUMAN	19823658	10074257	1.46452e+06	11763135	2.75283e+06	5.07236e+06	0	FALSE
+56.063VM+15.995TIPYQPM+15.995PASSPVIC+57.021AGGQDR	sp|Q15365|PCBP1_HUMAN	17717218	10641396	2.14932e+06	8.16899e+06	1.62472e+06	5078257	0	FALSE
+56.063LVAGSTDQLLSAFVPPEEPPLQPAR	sp|Q14137|BOP1_HUMAN;sp|Q14137-2|BOP1_HUMAN	7421563	3.78614e+06	502550	3.88002e+06	480288	2.5421e+06	0.000969982	FALSE
+56.063LATQSNEITIPVTFESR	tr|C9J3N8|C9J3N8_HUMAN;sp|P04792|HSPB1_HUMAN	530114176	257693952	26931362	272614432	54957976	110965168	0	FALSE
+56.063NAVITVPAYFNDSQR	sp|P38646|GRP75_HUMAN	46180168	84218144	20542550	23406682	30849906	13075988	0	FALSE
+56.063AAIAQALAGEVSVVPPSR	sp|Q2TAY7|SMU1_HUMAN	40529168	19289908	2.93844e+06	50706852	2.67617e+06	15702229	0	FALSE
+56.063QYFPNDEDQVGAAK+56.063	sp|P13674|P4HA1_HUMAN;sp|P13674-2|P4HA1_HUMAN;sp|P13674-3|P4HA1_HUMAN	22370050	7.75058e+06	6275948	7.8844e+06	3.28033e+06	5266164	0	FALSE
+56.063TDYNASVSVPDSSGPER	tr|Q5T6W2|Q5T6W2_HUMAN;sp|P61978|HNRPK_HUMAN;sp|P61978-2|HNRPK_HUMAN;sp|P61978-3|HNRPK_HUMAN	200128640	118328984	18554264	131424088	29007052	61988176	0	FALSE
+56.063LQQQQAQQPLQQQQQR	tr|A0A087WXK3|A0A087WXK3_HUMAN;sp|Q9NVH2|INT7_HUMAN;sp|Q9NVH2-2|INT7_HUMAN;sp|Q9NVH2-3|INT7_HUMAN;sp|Q9NVH2-4|INT7_HUMAN	18571414	10522541	714681	10352085	1.76706e+06	3.82043e+06	0	FALSE
+56.063EADASPASAGIC+57.021R	tr|J3QLV0|J3QLV0_HUMAN;tr|J3QLD4|J3QLD4_HUMAN;tr|J3QL54|J3QL54_HUMAN;sp|Q9BW27|NUP85_HUMAN;sp|Q9BW27-2|NUP85_HUMAN;sp|Q9BW27-3|NUP85_HUMAN	19490642	9433828	892344	10731204	2.05539e+06	5791408	0	FALSE
+56.063IPSAVGYQPTLATDM+15.995GTMQER	tr|F8W0P7|F8W0P7_HUMAN;tr|F8W079|F8W079_HUMAN;tr|H0YH81|H0YH81_HUMAN;tr|H0YI37|H0YI37_HUMAN;sp|P06576|ATPB_HUMAN	44491416	23744904	5366052	19987454	21233894	21378992	0	FALSE
+56.063FYEQMNGPVAGASR	tr|E9PL12|E9PL12_HUMAN;tr|E9PK72|E9PK72_HUMAN;tr|E9PQZ1|E9PQZ1_HUMAN;tr|E9PK01|E9PK01_HUMAN;tr|E9PRY8|E9PRY8_HUMAN;tr|E9PIZ1|E9PIZ1_HUMAN;tr|E9PN91|E9PN91_HUMAN;tr|H0YCK7|H0YCK7_HUMAN;tr|E9PMW7|E9PMW7_HUMAN;tr|E9PPR1|E9PPR1_HUMAN;tr|A0A087X1X7|A0A087X1X7_HUMAN;tr|E9PKK3|E9PKK3_HUMAN;tr|E9PK06|E9PK06_HUMAN;tr|E9PL71|E9PL71_HUMAN;tr|E9PQ49|E9PQ49_HUMAN;tr|E9PI39|E9PI39_HUMAN;sp|P29692|EF1D_HUMAN;sp…	0	25780760	2743235	5945803	7818066	4.57913e+06	0	FALSE
+56.063IINEPTAAAIAYGLDR	tr|A0A0G2JIW1|A0A0G2JIW1_HUMAN;sp|P0DMV9|HS71B_HUMAN;sp|P17066|HSP76_HUMAN;sp|P0DMV8|HS71A_HUMAN;sp|P0DMV8-2|HS71A_HUMAN	482009952	248889920	31500538	257520080	49764004	124183960	0	FALSE
+56.063ANC+57.021SDNEFTQALTAAIPPESLTR	tr|H7C463|H7C463_HUMAN;tr|B9A067|B9A067_HUMAN;tr|C9J406|C9J406_HUMAN;sp|Q16891|MIC60_HUMAN;sp|Q16891-2|MIC60_HUMAN;sp|Q16891-3|MIC60_HUMAN;sp|Q16891-4|MIC60_HUMAN	16046112	8668746	1.2076e+06	9056921	1.221e+06	5895280	0	FALSE
+56.063LAAVDATVNQVLASR	sp|Q15084|PDIA6_HUMAN;sp|Q15084-2|PDIA6_HUMAN;sp|Q15084-3|PDIA6_HUMAN;sp|Q15084-4|PDIA6_HUMAN;sp|Q15084-5|PDIA6_HUMAN	55611860	26885202	1163110	28692294	17331996	10369281	0	FALSE
+56.063GC+57.021PVNTEPSGPTC+57.021EK+56.063	sp|P53701|CCHL_HUMAN	4.00483e+06	1.69251e+06	274161	1.7057e+06	634843	3.16463e+06	0	FALSE
+56.063TPAALAALSLTGSGTPPTAANYPSSSR	sp|Q9UQ35|SRRM2_HUMAN	34177748	22225936	1.40199e+06	18640566	4.73531e+06	7.75594e+06	0	FALSE
+56.063DLYANTVLSGGTTM+15.995YPGIADR	tr|A0A2R8Y793|A0A2R8Y793_HUMAN;sp|P63261|ACTG_HUMAN;sp|P60709|ACTB_HUMAN	60755528	29956010	5542525	30765868	6424502	20048966	0	FALSE
+56.063VITEYLNAQESAK+56.063	sp|Q7KZF4|SND1_HUMAN	84123360	41654240	4.44657e+06	53960628	7794854	24092852	0	FALSE
+56.063GVQVETISPGDGR	tr|A0A087WV48|A0A087WV48_HUMAN;tr|A0A087WZM5|A0A087WZM5_HUMAN;tr|A0A087WTS4|A0A087WTS4_HUMAN;tr|Q1JUQ3|Q1JUQ3_HUMAN;sp|P62942|FKB1A_HUMAN	106626616	52571992	6.91969e+06	57469396	11505672	27617338	0	FALSE
+56.063GAPTTSLISVAVTK+56.063	tr|A0A0J9YWF7|A0A0J9YWF7_HUMAN;tr|A0A1B0GUY0|A0A1B0GUY0_HUMAN;tr|A0A1B0GTJ4|A0A1B0GTJ4_HUMAN;tr|A0A1B0GVU0|A0A1B0GVU0_HUMAN;tr|H0YHM6|H0YHM6_HUMAN;tr|A0A1B0GUA1|A0A1B0GUA1_HUMAN;tr|A0A1B0GTG2|A0A1B0GTG2_HUMAN;tr|A0A1B0GW82|A0A1B0GW82_HUMAN;tr|A0A1B0GV49|A0A1B0GV49_HUMAN;tr|A0A1B0GTY9|A0A1B0GTY9_HUMAN;tr|A0A1B0GW77|A0A1B0GW77_HUMAN;sp|P49419|AL7A1_HUMAN;sp|P49419-2|AL7A1_HUMAN;sp|P49419-4|AL7A1_HU…	16681217	5.6263e+06	750552	6421066	1.67171e+06	3.65284e+06	0	FALSE
+56.063SSTPLPTISSSAENTR	tr|H0YJH7|H0YJH7_HUMAN;tr|G5E972|G5E972_HUMAN;sp|P42166|LAP2A_HUMAN;sp|P42167|LAP2B_HUMAN;sp|P42167-2|LAP2B_HUMAN;sp|P42167-3|LAP2B_HUMAN	82996408	43791748	5.36124e+06	49219124	10238951	31408946	0	FALSE
+62.100LC+57.021PPGIPTPGSGLPPPR	tr|F8VPD4|F8VPD4_HUMAN;sp|P27708|PYR1_HUMAN	9186344	72388120	9877101	71161944	33133812	0	0	FALSE
+56.063GGVQVPAVDISSSLGGR	sp|Q09666|AHNK_HUMAN	21505870	11562916	1.93119e+06	12840954	2.48514e+06	5545007	0.000969982	FALSE
+56.063AM+15.995GIM+15.995NSFVNDIFER	tr|U3KQK0|U3KQK0_HUMAN;sp|Q99877|H2B1N_HUMAN;sp|P23527|H2B1O_HUMAN;sp|P57053|H2BFS_HUMAN;sp|P62807|H2B1C_HUMAN;sp|P58876|H2B1D_HUMAN;sp|Q5QNW6|H2B2F_HUMAN;sp|Q5QNW6-2|H2B2F_HUMAN;sp|P06899|H2B1J_HUMAN;sp|O60814|H2B1K_HUMAN;sp|Q16778|H2B2E_HUMAN;sp|Q93079|H2B1H_HUMAN;sp|Q8N257|H2B3B_HUMAN;sp|P33778|H2B1B_HUMAN;sp|Q99880|H2B1L_HUMAN;sp|Q99879|H2B1M_HUMAN	4819284	2216881	1.32361e+06	2378183	1272627	2.44967e+06	0.000625249	FALSE
+56.063YM+15.995PQNPC+57.021IIATK+56.063	sp|Q09028|RBBP4_HUMAN;sp|Q09028-2|RBBP4_HUMAN;sp|Q09028-3|RBBP4_HUMAN;sp|Q09028-4|RBBP4_HUMAN	10198635	6340427	2919894	3975117	2.81708e+06	2.22364e+06	0.000969982	FALSE
+56.063QSSVTQVTEQSPK+56.063	tr|C9JWN0|C9JWN0_HUMAN;sp|Q14966|ZN638_HUMAN;sp|Q14966-2|ZN638_HUMAN;sp|Q14966-3|ZN638_HUMAN;sp|Q14966-4|ZN638_HUMAN;sp|Q14966-6|ZN638_HUMAN	13581937	5.88159e+06	652101	6.0948e+06	1.25972e+06	2.76881e+06	0	FALSE
+56.063AGGGPTLQC+57.021PPPSSPEK+56.063	sp|Q96N66|MBOA7_HUMAN;sp|Q96N66-2|MBOA7_HUMAN;sp|Q96N66-3|MBOA7_HUMAN	10240231	3053836	649191	3.17261e+06	560627	962261	0	FALSE
+56.063LLDAVDTYIPVPAR	sp|P49411|EFTU_HUMAN	61786880	31084726	3086141	32165120	5.70115e+06	18468872	0	FALSE
+56.063ATFYGEQVDYYK+56.063	tr|H0YLE8|H0YLE8_HUMAN;sp|P46940|IQGA1_HUMAN	17256542	19982610	4.3893e+06	20221456	12585715	10550776	0	FALSE
+56.063LNFSTPTSTNIVSVC+57.021R	tr|J3QSH6|J3QSH6_HUMAN;tr|J3QSG0|J3QSG0_HUMAN;sp|O15067|PUR4_HUMAN	10852354	6.90416e+06	9773863	7.54474e+06	3.95741e+06	2.15756e+06	0	FALSE
+56.063SQNIVTDSSSLSAEAIR	tr|A0A087WUZ3|A0A087WUZ3_HUMAN;sp|Q01082|SPTB2_HUMAN;sp|Q01082-2|SPTB2_HUMAN;sp|Q01082-3|SPTB2_HUMAN	34405728	20232004	0	16377993	4.83984e+06	6.31907e+06	0	FALSE
+56.063LGADAVGMSTVPEVIVAR	sp|P00491|PNPH_HUMAN	11809631	4408701	647760	9725331	0	685586	0	FALSE
+56.063LGADAVGMSTVPEVIVAR	sp|P00491|PNPH_HUMAN	16984268	7412375	1.63654e+06	16870826	49255.1	3.53033e+06	0	FALSE
+56.063EVDEQM+15.995LNVQNK+56.063	tr|Q5ST81|Q5ST81_HUMAN;tr|Q5JP53|Q5JP53_HUMAN;sp|P07437|TBB5_HUMAN;sp|Q13885|TBB2A_HUMAN;sp|P68371|TBB4B_HUMAN;sp|Q9BVA1|TBB2B_HUMAN	38644560	19450022	905466	20333716	4.32257e+06	11110211	0	FALSE
+56.063IATLGYLPTQQDVLR	tr|A0A087WVZ3|A0A087WVZ3_HUMAN;tr|K7EL62|K7EL62_HUMAN;sp|P29992|GNA11_HUMAN	11942280	6.74473e+06	149918	6.45616e+06	1.47389e+06	3.20864e+06	0	FALSE
+56.063DLYEDELVPLFEK+56.063	tr|B4DT28|B4DT28_HUMAN;sp|O43390|HNRPR_HUMAN;sp|O43390-2|HNRPR_HUMAN;sp|O43390-3|HNRPR_HUMAN;sp|O43390-4|HNRPR_HUMAN	5.43748e+06	2.46582e+06	302031	2.77228e+06	495070	1.59579e+06	0	FALSE
+56.063M+15.995VIITGPPEAQFK+56.063	tr|F8W930|F8W930_HUMAN;sp|Q9NZI8|IF2B1_HUMAN;sp|Q9NZI8-2|IF2B1_HUMAN;sp|Q9Y6M1|IF2B2_HUMAN;sp|Q9Y6M1-1|IF2B2_HUMAN;sp|Q9Y6M1-3|IF2B2_HUMAN;sp|Q9Y6M1-4|IF2B2_HUMAN;sp|Q9Y6M1-5|IF2B2_HUMAN;sp|Q9Y6M1-6|IF2B2_HUMAN;sp|O00425|IF2B3_HUMAN;sp|O00425-2|IF2B3_HUMAN	12632633	14368175	3.96831e+06	3.10699e+06	2.58652e+06	5059730	0	FALSE
+66.125SQGGEPTYNVAVGR	tr|C9J712|C9J712_HUMAN;tr|C9J0J7|C9J0J7_HUMAN;tr|C9JQ45|C9JQ45_HUMAN;tr|G5E9Q6|G5E9Q6_HUMAN;sp|P35080|PROF2_HUMAN;sp|P35080-2|PROF2_HUMAN	57418116	29885654	8.13465e+06	30540950	8574643	14699693	0	FALSE
+56.063VAEDEAEAAAAAK+56.063	tr|J3KPF3|J3KPF3_HUMAN;tr|H0YFS2|H0YFS2_HUMAN;tr|F5H0E2|F5H0E2_HUMAN;tr|F5GZS6|F5GZS6_HUMAN;tr|F5H867|F5H867_HUMAN;sp|P08195|4F2_HUMAN;sp|P08195-2|4F2_HUMAN;sp|P08195-3|4F2_HUMAN;sp|P08195-4|4F2_HUMAN	172089280	82862176	10841090	72039808	15909694	25988192	0	FALSE
+56.063GTGGVDTAATGGVFDISNLDR	sp|P12532|KCRU_HUMAN;sp|P12532-2|KCRU_HUMAN	20257046	5.06832e+06	5338689	2.02909e+06	851595	5.8977e+06	0	FALSE
+56.063LVSEFPYIEAEVK+56.063	sp|P43304|GPDM_HUMAN;sp|P43304-2|GPDM_HUMAN	16160950	8484999	967761	8604304	1.16192e+06	4649732	0	FALSE
+56.063VLNNM+15.995EIGTSLFDEEGAK+56.063	sp|P00558|PGK1_HUMAN;sp|P00558-2|PGK1_HUMAN	4.93849e+06	4.8785e+06	0	0	0	0	0.000969982	FALSE
+56.063IGQQPQQPGAPPQQDYTK+56.063	tr|M0QYG1|M0QYG1_HUMAN;tr|M0R0C6|M0R0C6_HUMAN;tr|A0A087WTP3|A0A087WTP3_HUMAN;sp|Q92945|FUBP2_HUMAN	2.7123e+06	0	452025	0	0	245112	0	FALSE
+56.063SGNIPAGTTVDTK+56.063	sp|Q9UKV8|AGO2_HUMAN	39376164	17129036	1.35939e+06	14620220	1.12811e+06	6274391	0	FALSE
+56.063ASSESSYPTAESQAEAER	sp|Q53GS7|GLE1_HUMAN;sp|Q53GS7-2|GLE1_HUMAN	5.33532e+06	2.55353e+06	611163	2.70563e+06	364696	1.16177e+06	0.000969982	FALSE
+56.063SSIDSEPALVLGPLK+56.063	tr|A0A0G2JP90|A0A0G2JP90_HUMAN;tr|A0A0G2JN29|A0A0G2JN29_HUMAN;tr|A0A087X117|A0A087X117_HUMAN;tr|A0A087WW46|A0A087WW46_HUMAN;tr|J3KN36|J3KN36_HUMAN;sp|P69849|NOMO3_HUMAN;sp|Q5JPE7|NOMO2_HUMAN;sp|Q5JPE7-2|NOMO2_HUMAN;sp|Q5JPE7-3|NOMO2_HUMAN;sp|Q15155|NOMO1_HUMAN	22260348	11670279	963337	12721206	1.98348e+06	6074751	0	FALSE
+56.063YQSAPSQAPGNTIER	sp|Q86XZ4|SPAS2_HUMAN	11674442	4.941e+06	593711	5.68584e+06	1.12278e+06	2597976	0.000969982	FALSE
+56.063EGFSIPVSADGFK+56.063	tr|J3KQ37|J3KQ37_HUMAN;tr|J3KNE0|J3KNE0_HUMAN;sp|P49792|RBP2_HUMAN;sp|Q7Z3J3|RGPD4_HUMAN;sp|O14715|RGPD8_HUMAN;sp|Q99666|RGPD5_HUMAN;sp|A6NKT7|RGPD3_HUMAN	11966541	6.03928e+06	5.69691e+06	32258512	18338278	6801484	0.000969982	FALSE
+56.063AQQEFAAGVFSNPAVR	sp|O14828|SCAM3_HUMAN;sp|O14828-2|SCAM3_HUMAN	10189879	6.29906e+06	3360747	8.30531e+06	4.50508e+06	8128545	0	FALSE
+56.063AILVDLEPGTMDSVR	tr|G3V2N6|G3V2N6_HUMAN;tr|Q5JP53|Q5JP53_HUMAN;tr|G3V2R8|G3V2R8_HUMAN;tr|G3V5W4|G3V5W4_HUMAN;tr|A0A0B4J269|A0A0B4J269_HUMAN;tr|G3V3R4|G3V3R4_HUMAN;sp|P07437|TBB5_HUMAN;sp|Q13885|TBB2A_HUMAN;sp|Q13509|TBB3_HUMAN;sp|Q9BVA1|TBB2B_HUMAN	7862772	4.03033e+06	320499	2.85482e+06	613439	2.40895e+06	0.000969982	FALSE
+56.063LGPVPSSTIEPAEAQSASSDLPQVLSTSTGLTK+56.063	sp|Q5T8P6-2|RBM26_HUMAN;sp|Q5T8P6-3|RBM26_HUMAN;sp|Q5T8P6-5|RBM26_HUMAN	7.22948e+06	4.75741e+06	1.68718e+06	4.41473e+06	1.73272e+06	1.5179e+06	0	FALSE
+56.063C+57.021DPAGYYC+57.021GFK+56.063	tr|G3V5Z7|G3V5Z7_HUMAN;tr|G3V295|G3V295_HUMAN;sp|P60900|PSA6_HUMAN;sp|P60900-2|PSA6_HUMAN;sp|P60900-3|PSA6_HUMAN	7161531	6514645	2067980	6594443	8655942	13090838	0	FALSE
+56.063GPVFAPPYEPLPENVK+56.063	sp|P11387|TOP1_HUMAN	61682868	29046878	37603940	28471594	3.6283e+06	12049333	0	FALSE
+56.063C+57.021EFQDAYVLLSEK+56.063	sp|P10809|CH60_HUMAN	10444329	4952715	552004	5.41108e+06	3.67571e+06	3.07818e+06	0	FALSE
+56.063LSDALAVEDDQVAPVPLNVVETSSSVR	sp|Q86UP2|KTN1_HUMAN;sp|Q86UP2-2|KTN1_HUMAN;sp|Q86UP2-3|KTN1_HUMAN;sp|Q86UP2-4|KTN1_HUMAN	11669508	5931646	1224485	6045455	1.24286e+06	3.19151e+06	0	FALSE
+56.063SVIEQGGIQTVDQLIK+56.063	sp|Q8WUM4|PDC6I_HUMAN;sp|Q8WUM4-2|PDC6I_HUMAN	10246695	4.58978e+06	618281	4386160	779729	2.40597e+06	0	FALSE
+56.063GLQPGTTDQDLVK+56.063	tr|A0A1W2PQV1|A0A1W2PQV1_HUMAN;tr|F8W1T6|F8W1T6_HUMAN;tr|F8VQS9|F8VQS9_HUMAN;sp|Q15434|RBMS2_HUMAN	22060386	3.61755e+06	201662	7.35844e+06	0	2.32421e+06	0	FALSE
+56.063LSPEPWTPETGLVTDAFK+56.063	sp|O95573|ACSL3_HUMAN;sp|O60488|ACSL4_HUMAN;sp|O60488-2|ACSL4_HUMAN	3.77887e+06	1979077	515333	2137312	518563	1.51371e+06	0	FALSE
+56.063AAEEAFVNDIDESSPGTEWER	sp|P09496-2|CLCA_HUMAN;sp|P09496-5|CLCA_HUMAN	7.34862e+06	3.39986e+06	4.99447e+06	2407714	5069652	0	0	FALSE
+56.063DVGGEGVQQGLLK+56.063	sp|O76031|CLPX_HUMAN	27705816	12941382	2.1447e+06	30216988	40421988	14909920	0	FALSE
+56.063TALINSTGEEVAMR	tr|Q5TCI8|Q5TCI8_HUMAN;tr|Q3BDU5|Q3BDU5_HUMAN;sp|P02545|LMNA_HUMAN;sp|P02545-2|LMNA_HUMAN;sp|P02545-4|LMNA_HUMAN;sp|P02545-5|LMNA_HUMAN;sp|P02545-6|LMNA_HUMAN	49310060	26686236	9084327	34395108	6438969	18637652	0	FALSE
+56.063GAEAANVTGPDGVPVEGSR	tr|A0A0D9SEI8|A0A0D9SEI8_HUMAN;sp|P16989|YBOX3_HUMAN;sp|P16989-2|YBOX3_HUMAN;sp|P16989-3|YBOX3_HUMAN	39659152	19723042	543569	19374154	2.95551e+06	12557959	0	FALSE
+56.063FQPQSPDFLDITNPK+56.063	tr|C9J6N9|C9J6N9_HUMAN;tr|C9JNP9|C9JNP9_HUMAN;tr|C9IZG3|C9IZG3_HUMAN;sp|Q92890|UFD1_HUMAN;sp|Q92890-1|UFD1_HUMAN;sp|Q92890-3|UFD1_HUMAN	5237647	2.87649e+06	2.08543e+06	3.63485e+06	1.54663e+06	960875	0	FALSE
+56.063MDENQFVAVTSTNAAK+56.063	tr|E9PD68|E9PD68_HUMAN;tr|H0YBT4|H0YBT4_HUMAN;tr|A0A1C7CYX9|A0A1C7CYX9_HUMAN;sp|Q14194|DPYL1_HUMAN;sp|Q14194-2|DPYL1_HUMAN;sp|Q16555|DPYL2_HUMAN;sp|Q16555-2|DPYL2_HUMAN;sp|Q14195|DPYL3_HUMAN;sp|Q14195-2|DPYL3_HUMAN	22213034	10640639	543723	11776883	3940057	4240657	0.000969982	FALSE
+56.063GNDISSGTVLSDYVGSGPPK+56.063	sp|P30086|PEBP1_HUMAN	86167008	48303288	4980704	36407584	5.98214e+06	19398784	0	FALSE
+56.063YPASTVQILGAEK+56.063	tr|H0YDU4|H0YDU4_HUMAN;tr|H0Y653|H0Y653_HUMAN;sp|O00567|NOP56_HUMAN	52909032	58890468	4947280	55332636	10778256	30671588	0	FALSE
+56.063DNSTMGYM+15.995MAK+56.063	sp|P08238|HS90B_HUMAN;sp|Q58FF7|H90B3_HUMAN	22488604	10305081	1.71877e+06	8810951	328497	3.10216e+06	0	FALSE
+56.063TPTC+57.021QSSTDC+57.021SPYAR	sp|O95235|KI20A_HUMAN;sp|O95235-2|KI20A_HUMAN	3578142	1767015	195970	2230471	407175	689210	0.000969982	FALSE
+56.063VASSPVMVSNPATR	tr|A6NEM2|A6NEM2_HUMAN;sp|P51610|HCFC1_HUMAN;sp|P51610-2|HCFC1_HUMAN;sp|P51610-4|HCFC1_HUMAN	39462864	20379056	641977	17129594	2720442	5.91186e+06	0.000969982	FALSE
+56.063ELPPDQAEYC+57.021IAR	tr|H9KV75|H9KV75_HUMAN;tr|H7C144|H7C144_HUMAN;tr|H0YJW3|H0YJW3_HUMAN;tr|F5GXS2|F5GXS2_HUMAN;sp|P12814|ACTN1_HUMAN;sp|P12814-2|ACTN1_HUMAN;sp|P12814-3|ACTN1_HUMAN;sp|P12814-4|ACTN1_HUMAN;sp|O43707|ACTN4_HUMAN;sp|O43707-2|ACTN4_HUMAN;sp|O43707-3|ACTN4_HUMAN	488182304	246124624	27170368	259638688	47895496	115525144	0	FALSE
+56.063VTAEADSSSPTGILATSESK+56.063	sp|A0MZ66|SHOT1_HUMAN;sp|A0MZ66-3|SHOT1_HUMAN;sp|A0MZ66-4|SHOT1_HUMAN;sp|A0MZ66-5|SHOT1_HUMAN;sp|A0MZ66-6|SHOT1_HUMAN;sp|A0MZ66-7|SHOT1_HUMAN;sp|A0MZ66-8|SHOT1_HUMAN	22941546	8.04976e+06	5271745	8261301	982999	3.88516e+06	0.000969982	FALSE
+56.063VLNNM+15.995EIGTSLFDEEGAK+56.063	sp|P00558|PGK1_HUMAN;sp|P00558-2|PGK1_HUMAN	8469729	3.69816e+06	762666	4.86297e+06	1.4856e+06	2.00257e+06	0.000969982	FALSE
+56.063TVEEAENIAVTSGVVR	sp|O76070|SYUG_HUMAN	24407610	14476320	959225	9715242	1.81274e+06	9414345	0	FALSE
+56.063AVC+57.021M+15.995LSNTTAIAEAWAR	tr|C9J2C0|C9J2C0_HUMAN;tr|V9GZ17|V9GZ17_HUMAN;sp|P68363|TBA1B_HUMAN;sp|P68363-2|TBA1B_HUMAN;sp|Q9NY65|TBA8_HUMAN;sp|Q9NY65-2|TBA8_HUMAN;sp|P68366|TBA4A_HUMAN;sp|P68366-2|TBA4A_HUMAN;sp|P0DPH7|TBA3C_HUMAN;sp|P0DPH7-2|TBA3C_HUMAN;sp|P0DPH8|TBA3D_HUMAN;sp|Q6PEY2|TBA3E_HUMAN;sp|Q71U36|TBA1A_HUMAN;sp|Q71U36-2|TBA1A_HUMAN	7855167	1.81475e+06	31500266	13833155	2.04781e+06	17164854	0	FALSE
+56.063TFAPEEISAM+15.995VLTK+56.063	sp|P11021|BIP_HUMAN	14413854	7531722	2.02344e+06	6.95899e+06	1.8386e+06	5.15306e+06	0	FALSE
+56.063GVVDSEDIPLNLSR	tr|I3L239|I3L239_HUMAN;tr|I3L0K7|I3L0K7_HUMAN;sp|Q12931|TRAP1_HUMAN;sp|Q12931-2|TRAP1_HUMAN	1098963712	545416768	71265448	562668288	124637040	240132720	0	FALSE
+56.063GVVDSEDLPLNISR	sp|P07900|HS90A_HUMAN;sp|P07900-2|HS90A_HUMAN;sp|P08238|HS90B_HUMAN	1098963712	545416768	71265448	562668288	124637040	240132720	0	FALSE
+56.063ANLPQSFQVDTSK+56.063	tr|Q60FE5|Q60FE5_HUMAN;tr|A0A087WWY3|A0A087WWY3_HUMAN;sp|P21333|FLNA_HUMAN;sp|P21333-2|FLNA_HUMAN	214212192	101805616	9597823	112172480	19778986	48465160	0	FALSE
+56.063LVVPATQC+57.021GSLIGK+56.063	sp|Q15365|PCBP1_HUMAN	564357056	277617696	44147640	318430240	62961088	151140912	0	FALSE
+56.063ALTVPELTQQM+15.995FDAK+56.063	tr|A0A0B4J269|A0A0B4J269_HUMAN;sp|P04350|TBB4A_HUMAN;sp|Q13509|TBB3_HUMAN;sp|Q13509-2|TBB3_HUMAN;sp|P68371|TBB4B_HUMAN	54967844	28790082	2.13199e+06	27605706	6.74033e+06	10593765	0	FALSE
+56.063SDPLLIGIPTSENPFK+56.063	sp|Q9UBI6|GBG12_HUMAN	3.2717e+06	2.48933e+06	474335	1.85459e+06	1.22271e+06	1.52466e+06	0	FALSE
+56.063EALENANTNTEVLK+56.063	sp|Q9H444|CHM4B_HUMAN	25400920	10753664	1.09046e+06	11977297	2776748	6128985	0.000969982	FALSE
+56.063IAPPEAPVTGYM+15.995FGK+56.063	sp|P09874|PARP1_HUMAN	95060552	44490408	6615811	41911108	10830546	28489498	0	FALSE
+56.063ALTVPELTQQVFDAK+56.063	tr|Q5ST81|Q5ST81_HUMAN;tr|Q5JP53|Q5JP53_HUMAN;sp|P07437|TBB5_HUMAN	1373400960	682514240	81921128	655649024	137573920	268287760	0	FALSE
+56.063LSELQETSEQAQSK+56.063	tr|A0A0A0MT60|A0A0A0MT60_HUMAN;sp|Q5T1M5|FKB15_HUMAN;sp|Q5T1M5-2|FKB15_HUMAN	10331023	4.33821e+06	476056	5388435	515613	2.54024e+06	0	FALSE
+56.063SSQTSGTNEQSSAIVSAR	sp|O60763|USO1_HUMAN;sp|O60763-2|USO1_HUMAN	19563988	10166240	1.37818e+06	11815818	2286684	4.83242e+06	0	FALSE
+56.063AYSDPSTGEPATYGELQQR	tr|H0YDN1|H0YDN1_HUMAN;sp|Q15149|PLEC_HUMAN;sp|Q15149-2|PLEC_HUMAN;sp|Q15149-3|PLEC_HUMAN;sp|Q15149-4|PLEC_HUMAN;sp|Q15149-5|PLEC_HUMAN;sp|Q15149-6|PLEC_HUMAN;sp|Q15149-7|PLEC_HUMAN;sp|Q15149-8|PLEC_HUMAN;sp|Q15149-9|PLEC_HUMAN	302941152	158329904	21713110	166404704	34432640	80953656	0.000969982	FALSE
+56.063GSSGVGLTAAVTTDQETGER	tr|J3KQ69|J3KQ69_HUMAN;sp|P25205|MCM3_HUMAN;sp|P25205-2|MCM3_HUMAN	26972382	11118323	1.32852e+06	11340938	1.83072e+06	4366700	0	FALSE
+56.063AASTAPSSTSTPAASSAGLIYIDPSNLR	tr|E7EMW7|E7EMW7_HUMAN;sp|O95071|UBR5_HUMAN;sp|O95071-2|UBR5_HUMAN	20259172	7.64438e+06	2.78619e+06	9184299	1.99545e+06	3.78137e+06	0	FALSE
+56.063EAVLIDPVLETAPR	tr|M0QXB5|M0QXB5_HUMAN;tr|M0QY80|M0QY80_HUMAN;sp|O95571|ETHE1_HUMAN	28900560	13796333	1.12917e+06	12886030	1941709	5906197	0	FALSE
+56.063LTPITYPQGLAMAK+56.063	sp|P63000|RAC1_HUMAN;sp|P63000-2|RAC1_HUMAN	46591344	22399298	1761326	22171254	3.16075e+06	7.91554e+06	0	FALSE
+56.063TAVPSPVEAAAASDPAAAR	tr|J3KNC2|J3KNC2_HUMAN;sp|Q147X3|NAA30_HUMAN;sp|Q147X3-2|NAA30_HUMAN	15846491	7172861	1.51773e+06	10842193	2316853	3.19212e+06	0	FALSE
+56.063MDATANDVPSPYEVR	sp|P30101|PDIA3_HUMAN	115426304	59669492	7.88101e+06	59792296	10756623	28215996	0	FALSE
+56.063STSAPQMSPGSSDNQSSSPQPAQQK+56.063	tr|F8W726|F8W726_HUMAN;sp|Q14157|UBP2L_HUMAN;sp|Q14157-1|UBP2L_HUMAN;sp|Q14157-3|UBP2L_HUMAN;sp|Q14157-4|UBP2L_HUMAN;sp|Q14157-5|UBP2L_HUMAN	1.02049e+06	729597	0	612353	0	0	0.000969982	FALSE
+56.063TQDPSSPGTTPPQAR	sp|Q13112|CAF1B_HUMAN	4.09668e+06	2.29088e+06	404171	2.36217e+06	513180	1.12565e+06	0.000969982	FALSE
+56.063GPVGTVSEAQLAR	sp|Q9NZM1|MYOF_HUMAN;sp|Q9NZM1-2|MYOF_HUMAN;sp|Q9NZM1-3|MYOF_HUMAN;sp|Q9NZM1-5|MYOF_HUMAN;sp|Q9NZM1-6|MYOF_HUMAN;sp|Q9NZM1-7|MYOF_HUMAN;sp|Q9NZM1-8|MYOF_HUMAN	49466052	24519724	3605397	26001204	2.67865e+06	4976447	0.000969982	FALSE
+56.063TAAANAAAGAAENAFRAP	sp|O14828|SCAM3_HUMAN;sp|O14828-2|SCAM3_HUMAN	172071488	92719728	15647112	103259376	18961948	47517448	0	FALSE
+56.063LYTSAPNTSQGK+56.063	tr|J3KP30|J3KP30_HUMAN;sp|Q5QJE6|TDIF2_HUMAN	18690954	8.16899e+06	5167017	10013769	806258	5815444	0	FALSE
+56.063AAAEDVNVTFEDQQK+56.063	tr|E9PQY2|E9PQY2_HUMAN;sp|Q9NQP4|PFD4_HUMAN	40772992	20980734	9052497	21712998	10768399	13794280	0	FALSE
+56.063M+15.995ATNAAAQNAIK+56.063	sp|Q9Y490|TLN1_HUMAN	33835544	13015956	5161805	9078849	2.57647e+06	53783.4	0	FALSE
+56.063EAALTSEEVGADLEQVEVLQK+56.063	tr|A0A0D9SF54|A0A0D9SF54_HUMAN;tr|A0A0D9SGF6|A0A0D9SGF6_HUMAN;sp|Q13813|SPTN1_HUMAN;sp|Q13813-2|SPTN1_HUMAN;sp|Q13813-3|SPTN1_HUMAN	11376970	10561393	2.82003e+06	6.01795e+06	1704656	3.39571e+06	0.000969982	FALSE
+56.063TVDNFVALATGEK+56.063	sp|P23284|PPIB_HUMAN	129258128	71775568	7453364	75401080	14667886	50441492	0	FALSE
+56.063DNSTM+15.995GYMAAK+56.063	sp|P07900|HS90A_HUMAN;sp|P07900-2|HS90A_HUMAN	48721576	23702532	5561250	29313670	19490418	13472510	0	FALSE
+56.063MSQVPAPVPLM+15.995SLR	sp|Q9UQ35|SRRM2_HUMAN	22682250	9086278	18127244	13319968	25376472	13977617	0	FALSE
+56.063GVDEVTIVNILTNR	tr|H0YKZ7|H0YKZ7_HUMAN;tr|H0YKS4|H0YKS4_HUMAN;tr|H0YMD0|H0YMD0_HUMAN;tr|H0YLV6|H0YLV6_HUMAN;tr|H0YMD9|H0YMD9_HUMAN;tr|H0YKX9|H0YKX9_HUMAN;tr|H0YMW4|H0YMW4_HUMAN;tr|H0YN42|H0YN42_HUMAN;tr|H0YMU9|H0YMU9_HUMAN;tr|H0YMT9|H0YMT9_HUMAN;tr|H0YKL9|H0YKL9_HUMAN;tr|H0YMM1|H0YMM1_HUMAN;tr|H0YKV8|H0YKV8_HUMAN;sp|P07355|ANXA2_HUMAN;sp|P07355-2|ANXA2_HUMAN	1.07443e+06	703608	314803	787325	102772	405489	0.000969982	FALSE
+56.063LAQEGIYTLYPFINSR	sp|Q08J23|NSUN2_HUMAN;sp|Q08J23-2|NSUN2_HUMAN;sp|Q08J23-3|NSUN2_HUMAN	6.91808e+06	4857648	2.24936e+06	4.35551e+06	2.05689e+06	2.87982e+06	0	FALSE
+56.063STNGDTFLGGEDFDQALLR	sp|P38646|GRP75_HUMAN	7936949	13968277	2643759	4.02817e+06	4.50906e+06	2.14201e+06	0	FALSE
+56.063TVTAEVQPQC+57.021GR	sp|Q32P28|P3H1_HUMAN;sp|Q32P28-3|P3H1_HUMAN;sp|Q32P28-4|P3H1_HUMAN	33606812	18990922	4414018	20226752	4.39477e+06	10185697	0	FALSE
+56.063NLATTVTEEILEK+56.063	tr|B4DT28|B4DT28_HUMAN;sp|O43390|HNRPR_HUMAN;sp|O43390-2|HNRPR_HUMAN;sp|O43390-3|HNRPR_HUMAN;sp|O43390-4|HNRPR_HUMAN	11836569	5559433	305306	5864816	816190	3.21909e+06	0	FALSE
+56.063DNSTM+15.995GYM+15.995AAK+56.063	sp|P07900|HS90A_HUMAN;sp|P07900-2|HS90A_HUMAN	16332723	7.37625e+06	453896	7.77764e+06	1.5168e+06	4091499	0	FALSE
+56.063ANLQIDQINTDLNLER	sp|P35579|MYH9_HUMAN;sp|P35579-2|MYH9_HUMAN	16132364	8.15775e+06	276451	10710710	3.4209e+06	7.78348e+06	0.000969982	FALSE
+56.063VAPAQPSEEGPGR	tr|E7EX17|E7EX17_HUMAN;sp|P23588|IF4B_HUMAN;sp|P23588-2|IF4B_HUMAN	5.75617e+06	1.92356e+06	928612	2328603	327037	1.06076e+06	0	FALSE
+56.063TVQSLEIDLDSMR	tr|F8VZY9|F8VZY9_HUMAN;sp|P05783|K1C18_HUMAN	13379058	6.81367e+06	1.0009e+06	6.40293e+06	1.26676e+06	3.60062e+06	0	FALSE
+56.063VAEGQVTC+57.021PYLPPFPAR	sp|Q96DV4|RM38_HUMAN;sp|Q96DV4-2|RM38_HUMAN	14543255	5174026	3.38626e+06	4981749	5683897	3132137	0	FALSE
+56.063QLQSEQPQTAAAR	tr|G3V126|G3V126_HUMAN;sp|Q9UI12|VATH_HUMAN;sp|Q9UI12-2|VATH_HUMAN	3.74144e+06	1.89635e+06	0	2.15373e+06	244731	844855	0.000969982	FALSE
+56.063YQPLASTASDNDFVTPEPR	sp|Q15021|CND1_HUMAN	21095098	10544369	1.35603e+06	10560047	1.79466e+06	5371130	0	FALSE
+56.063ISLGLPVGAVINC+57.021ADNTGAK+56.063	tr|C9JD32|C9JD32_HUMAN;tr|B9ZVP7|B9ZVP7_HUMAN;tr|J3KT29|J3KT29_HUMAN;sp|P62829|RL23_HUMAN	7.8006e+06	3105738	449317	2.79699e+06	645638	1.46392e+06	0	FALSE
+56.063SSGAASSAPGGGDGAEYK+56.063	tr|A0A087WWP4|A0A087WWP4_HUMAN;sp|Q96T37|RBM15_HUMAN;sp|Q96T37-2|RBM15_HUMAN;sp|Q96T37-3|RBM15_HUMAN;sp|Q96T37-4|RBM15_HUMAN	6450495	3.42249e+06	280042	3.63587e+06	403843	1.45054e+06	0	FALSE
+56.063SAM+15.995PFTASPASSTTAR	sp|O00151|PDLI1_HUMAN	2.90068e+06	1.29819e+06	353887	1.4202e+06	1.27958e+06	1.09444e+06	0	FALSE
+56.063DNSTMGYMAAK+56.063	sp|P07900|HS90A_HUMAN;sp|P07900-2|HS90A_HUMAN	60488604	28483880	5065277	37752820	7.67833e+06	46734088	0	FALSE
+56.063SSGAASSAPGGGDGAEYK+56.063	tr|A0A087WWP4|A0A087WWP4_HUMAN;sp|Q96T37|RBM15_HUMAN;sp|Q96T37-2|RBM15_HUMAN;sp|Q96T37-3|RBM15_HUMAN;sp|Q96T37-4|RBM15_HUMAN	7343310	3279115	331391	3.50993e+06	603405	1.47939e+06	0	FALSE
+56.063ILAQVVGDVDTSLPR	sp|Q15029|U5S1_HUMAN;sp|Q15029-2|U5S1_HUMAN;sp|Q15029-3|U5S1_HUMAN	26060064	13720331	10298230	5233243	1.39131e+06	7.17081e+06	0	FALSE
+56.063AGQTQPNPGILPIQPALTPR	tr|E9PG46|E9PG46_HUMAN;sp|Q2M2I8|AAK1_HUMAN;sp|Q2M2I8-2|AAK1_HUMAN	26512504	14029979	1.15112e+06	12654026	2.26824e+06	4731685	0	FALSE
+56.063IAPPEAPVTGYM+15.995FGK+56.063	sp|P09874|PARP1_HUMAN	41406136	19375744	1.38213e+06	19880318	1.92824e+06	8.25904e+06	0	FALSE
+56.063IASLPQEVQDVSLLEK+56.063	tr|A2A2M0|A2A2M0_HUMAN;sp|Q9NQG5|RPR1B_HUMAN	17507042	9373084	1.32983e+06	8337220	1.33199e+06	4.53511e+06	0	FALSE
+56.063IGPYQPNVPVGIDYVIPK+56.063	tr|A8MXP9|A8MXP9_HUMAN;tr|A0A0R4J2E8|A0A0R4J2E8_HUMAN;tr|B3KM87|B3KM87_HUMAN;tr|Q68E03|Q68E03_HUMAN;sp|P43243|MATR3_HUMAN;sp|P43243-2|MATR3_HUMAN	14696140	12057803	7.12523e+06	10204936	3038996	2.83971e+06	0.000969982	FALSE
+56.063VASVSQNAIVSAAGNIAR	tr|E9PF10|E9PF10_HUMAN;sp|O75694|NU155_HUMAN;sp|O75694-2|NU155_HUMAN	78549368	44721116	3.68335e+06	45452596	9142038	21698246	0	FALSE
+56.063LVSGGGAC+57.021SDTGAC+57.021TPAR	sp|Q9UJC3|HOOK1_HUMAN;sp|Q9UJC3-2|HOOK1_HUMAN	6671430	3.09485e+06	525867	4.22962e+06	878780	1.63173e+06	0	FALSE
+56.063VITEYLNAQESAK+56.063	sp|Q7KZF4|SND1_HUMAN	87791440	40896152	3.86377e+06	47981816	7.57584e+06	23351582	0	FALSE
+56.063SNPEDQILYQTER	tr|F5H1S8|F5H1S8_HUMAN;tr|F5GX14|F5GX14_HUMAN;sp|Q14165|MLEC_HUMAN	34073884	18732956	1.33702e+06	18752616	3.14395e+06	6960984	0	FALSE
+56.063VLC+57.021QFC+57.021DQDPAQDAVK+56.063	tr|C9J453|C9J453_HUMAN;tr|C9JZJ7|C9JZJ7_HUMAN;tr|A0A087X0X0|A0A087X0X0_HUMAN;tr|A0A087X255|A0A087X255_HUMAN;sp|O15344|TRI18_HUMAN;sp|O15344-2|TRI18_HUMAN	15819269	7317243	210419	7797641	1901714	3484192	0.000969982	FALSE
+56.063VDNSSLTGESEPQTR	tr|B1AKY9|B1AKY9_HUMAN;tr|M0R116|M0R116_HUMAN;tr|A0A0A0MT26|A0A0A0MT26_HUMAN;tr|A0A2R8YEY8|A0A2R8YEY8_HUMAN;tr|M0QXF2|M0QXF2_HUMAN;sp|P13637|AT1A3_HUMAN;sp|P13637-2|AT1A3_HUMAN;sp|P13637-3|AT1A3_HUMAN;sp|P05023|AT1A1_HUMAN;sp|P05023-2|AT1A1_HUMAN;sp|P05023-3|AT1A1_HUMAN;sp|P05023-4|AT1A1_HUMAN;sp|P50993|AT1A2_HUMAN;sp|P20648|ATP4A_HUMAN	35600520	18484254	2.0269e+06	19022576	3605831	9356168	0	FALSE
+56.063GVVDSEDLPLNISR	sp|P07900|HS90A_HUMAN;sp|P07900-2|HS90A_HUMAN;sp|P08238|HS90B_HUMAN	9786292	13018727	0	11534587	19361780	5766995	0	FALSE
+56.063GVVDSEDIPLNLSR	tr|I3L239|I3L239_HUMAN;tr|I3L0K7|I3L0K7_HUMAN;sp|Q12931|TRAP1_HUMAN;sp|Q12931-2|TRAP1_HUMAN	9786292	13018727	0	11534587	19361780	5766995	0	FALSE
+56.063ESFSLVQVQPGVDIIR	tr|A0A0G2JL47|A0A0G2JL47_HUMAN;tr|A0A0G2JK23|A0A0G2JK23_HUMAN;tr|A0A024RCR6|A0A024RCR6_HUMAN;sp|P46379|BAG6_HUMAN;sp|P46379-2|BAG6_HUMAN;sp|P46379-3|BAG6_HUMAN;sp|P46379-4|BAG6_HUMAN;sp|P46379-5|BAG6_HUMAN	759495	283135	217734	201837	245930	247983	0	FALSE
+56.063VLEQLTGQTPVFSK+56.063	tr|Q5VVC8|Q5VVC8_HUMAN;sp|P62913|RL11_HUMAN;sp|P62913-2|RL11_HUMAN	468560832	251814208	46268984	261342688	63395500	136945488	0	FALSE
+56.063QFVTPADVVSGNPK+56.063	tr|A0A0A0MSQ0|A0A0A0MSQ0_HUMAN;tr|H7C4N2|H7C4N2_HUMAN;sp|P13797|PLST_HUMAN;sp|P13797-2|PLST_HUMAN;sp|P13797-3|PLST_HUMAN;sp|Q14651|PLSI_HUMAN	32584692	17693126	1.84376e+06	14872672	2.70106e+06	6780850	0	FALSE
+56.063C+57.021LYASVLTAQPR	sp|P13639|EF2_HUMAN	23520774	10377758	3.20897e+06	21482126	4004395	4.46951e+06	0	FALSE
+56.063AINGPTSASGDDISK+56.063	tr|B4DXZ6|B4DXZ6_HUMAN;tr|H7C4S4|H7C4S4_HUMAN;sp|P51114|FXR1_HUMAN;sp|P51114-3|FXR1_HUMAN	4.24022e+06	896303	1.17967e+06	976612	1.74874e+06	2813014	0	FALSE
+56.063LAALPNVYEVISK+56.063	tr|B1AHB1|B1AHB1_HUMAN;sp|P33992|MCM5_HUMAN	42398412	21515374	2156919	23334168	4.06543e+06	11496097	0	FALSE
+56.063LVTSPC+57.021C+57.021IVTSTYGWTANM+15.995ER	sp|P07900|HS90A_HUMAN;sp|P07900-2|HS90A_HUMAN	70841648	40364052	5.94183e+06	41483424	8515634	15003665	0	FALSE
+56.063LGPGGLDPVEVYESLPEELQK+56.063	tr|K7EIU0|K7EIU0_HUMAN;tr|K7EQA9|K7EQA9_HUMAN;sp|Q16543|CDC37_HUMAN	2.26654e+06	1.1776e+06	324134	1.0436e+06	397783	290861	0.000969982	FALSE
+56.063SPAAPGQSPTGSVC+57.021YER	sp|O75534|CSDE1_HUMAN;sp|O75534-4|CSDE1_HUMAN	20529150	9616657	926614	10365211	1.44151e+06	3.67093e+06	0	FALSE
+56.063LDPGSEETQTLVR	sp|P26641|EF1G_HUMAN;sp|P26641-2|EF1G_HUMAN	57641760	28409490	7210364	27539672	12988587	16613946	0	FALSE
+56.063GGAEQFM+15.995EETER	sp|Q99832|TCPH_HUMAN;sp|Q99832-2|TCPH_HUMAN;sp|Q99832-3|TCPH_HUMAN;sp|Q99832-4|TCPH_HUMAN	5827878	2.63248e+06	0	2.44383e+06	420608	1.32615e+06	0	FALSE
+56.063AAEGVSAADM+15.995AK+56.063	sp|Q9NW13|RBM28_HUMAN;sp|Q9NW13-2|RBM28_HUMAN	14041529	6117477	462043	3.68789e+06	5144789	2.8277e+06	0.000969982	FALSE
+56.063IATLGYLPTQQDVLR	tr|A0A087WVZ3|A0A087WVZ3_HUMAN;tr|K7EL62|K7EL62_HUMAN;sp|P29992|GNA11_HUMAN	9308275	4.89057e+06	350471	4.30777e+06	503696	2970743	0	FALSE
+56.063VFQSSTSQEQVYNDC+57.021AK+56.063	sp|P33176|KINH_HUMAN	42037280	21721304	2.2186e+06	25555990	4.17322e+06	25395460	0	FALSE
+56.063SFYPEEVSSM+15.995VLTK+56.063	tr|E9PN25|E9PN25_HUMAN;tr|E9PKE3|E9PKE3_HUMAN;tr|E9PQQ4|E9PQQ4_HUMAN;tr|E9PI65|E9PI65_HUMAN;tr|E9PLF4|E9PLF4_HUMAN;tr|E9PN89|E9PN89_HUMAN;tr|E9PPY6|E9PPY6_HUMAN;tr|E9PK54|E9PK54_HUMAN;tr|E9PQK7|E9PQK7_HUMAN;sp|P11142|HSP7C_HUMAN;sp|P11142-2|HSP7C_HUMAN	13891209	7045722	7208741	10554177	3943843	2.42505e+06	0	FALSE
+56.063TC+57.021DGVQC+57.021AFEELVEK+56.063	tr|H0Y6T8|H0Y6T8_HUMAN;tr|Q5W0J0|Q5W0J0_HUMAN;tr|A0A087X163|A0A087X163_HUMAN;sp|Q9NP72|RAB18_HUMAN;sp|Q9NP72-2|RAB18_HUMAN;sp|Q9NP72-3|RAB18_HUMAN	2.74838e+06	1.14349e+06	0	1.43444e+06	0	928744	0	FALSE
+56.063SVTEQGAELSNEER	tr|E9PD24|E9PD24_HUMAN;tr|E7ESK7|E7ESK7_HUMAN;tr|E5RGE1|E5RGE1_HUMAN;tr|E5RIR4|E5RIR4_HUMAN;tr|E7EVZ2|E7EVZ2_HUMAN;tr|E7EX29|E7EX29_HUMAN;sp|P63104|1433Z_HUMAN	29609930	15246351	1.48868e+06	16160786	3.19731e+06	5532999	0	FALSE
+56.063TPQAPASANLVGPR	sp|Q9UQ35|SRRM2_HUMAN	238851712	117556552	10173158	125347680	22466804	56414288	0	FALSE
+56.063EVIELPLTNPELFQR	tr|A0A087X2I1|A0A087X2I1_HUMAN;tr|H0YJC0|H0YJC0_HUMAN;tr|H0YJS8|H0YJS8_HUMAN;sp|P62333|PRS10_HUMAN	4.57747e+06	2.53858e+06	199187	2.45478e+06	490992	1.23074e+06	0	FALSE
+56.063LFLNETQTQEITEDIPVK+56.063	tr|J3KR24|J3KR24_HUMAN;sp|P41252|SYIC_HUMAN	12745278	6.17126e+06	816122	5.90417e+06	1.24119e+06	3.0117e+06	0	FALSE
+56.063AAEGVSAADMAK+56.063	sp|Q9NW13|RBM28_HUMAN;sp|Q9NW13-2|RBM28_HUMAN	32194134	17382174	4.31119e+06	14056857	1.51177e+06	5629540	0	FALSE
+56.063TISTSDPAEVLVK+56.063	tr|E5RJU9|E5RJU9_HUMAN;sp|Q86UE4|LYRIC_HUMAN	166992096	88412272	5583130	93428672	14730606	49974228	0	FALSE
+56.063SAQQEASADVATPK+56.063	sp|Q8WYP5|ELYS_HUMAN;sp|Q8WYP5-2|ELYS_HUMAN;sp|Q8WYP5-3|ELYS_HUMAN	19976648	9142969	879986	9793558	1.26624e+06	3.6618e+06	0	FALSE
+56.063GGAEQFMEETER	sp|Q99832|TCPH_HUMAN;sp|Q99832-2|TCPH_HUMAN;sp|Q99832-3|TCPH_HUMAN;sp|Q99832-4|TCPH_HUMAN	5.25049e+06	3.48124e+06	2.07777e+06	2.40205e+06	757920	1.90261e+06	0.000969982	FALSE
+56.063TQLPYEYYSLPFC+57.021QPSK+56.063	tr|A0A0C4DFM1|A0A0C4DFM1_HUMAN;tr|F8WCN2|F8WCN2_HUMAN;tr|F2Z2L1|F2Z2L1_HUMAN;sp|Q92544|TM9S4_HUMAN	13438634	7708916	222971	7846618	1.73836e+06	4.00394e+06	0	FALSE
+56.063ALTVPELTQQVFDAK+56.063	tr|Q5ST81|Q5ST81_HUMAN;tr|Q5JP53|Q5JP53_HUMAN;sp|P07437|TBB5_HUMAN	23843846	10313651	15339323	27417150	3.41736e+06	16396929	0	FALSE
+56.063GATLALTQVTPQDER	sp|P43121|MUC18_HUMAN	39314400	20295334	2.33577e+06	19966746	4931389	14137641	0	FALSE
+56.063TPTSSPASSPLVAK+56.063	sp|Q14684|RRP1B_HUMAN;sp|Q14684-2|RRP1B_HUMAN	94478344	51074424	1683862	49589488	8287282	21943080	0	FALSE
+56.063ITAQENDMEVELPAAANSR	tr|Q5JR91|Q5JR91_HUMAN;tr|Q5JR89|Q5JR89_HUMAN;sp|Q99661|KIF2C_HUMAN;sp|Q99661-2|KIF2C_HUMAN	21669538	14174219	529417	11184075	2203531	3.15182e+06	0	FALSE
+56.063VM+15.995QPLVQQPILPVVK+56.063	sp|Q5T8P6|RBM26_HUMAN;sp|Q5T8P6-2|RBM26_HUMAN	19912836	9210612	1.32177e+06	8.37613e+06	1.26919e+06	4.05678e+06	0	FALSE
+56.063SAAGYPDYYC+57.021K+56.063	sp|O14646|CHD1_HUMAN;sp|O14646-2|CHD1_HUMAN	7460972	7494761	3.17432e+06	7.53352e+06	4584962	6.07779e+06	0	FALSE
+56.063AAEGVSAADM+15.995AK+56.063	sp|Q9NW13|RBM28_HUMAN;sp|Q9NW13-2|RBM28_HUMAN	6324772	1.7341e+06	702246	2.68289e+06	735708	1017232	0.000969982	FALSE
+56.063VSEYVPEIVNFVQK+56.063	tr|B4DKY1|B4DKY1_HUMAN;sp|P49589|SYCC_HUMAN;sp|P49589-2|SYCC_HUMAN;sp|P49589-3|SYCC_HUMAN	16777744	8.2584e+06	1.7397e+06	13830884	2643256	6.24587e+06	0	FALSE
+56.063AVAVVVDPIQSVK+56.063	sp|O00487|PSDE_HUMAN	129783472	68060296	5585529	74102040	12868064	36763928	0	FALSE
+56.063SSGTASSVAFTPLQGLEIVNPQAAEK+56.063	tr|E7EVX8|E7EVX8_HUMAN;sp|Q8WWY3|PRP31_HUMAN	13981584	6513231	1.0042e+06	7.3624e+06	1.60859e+06	1643485	0	FALSE
+56.063EGPYDVVVLPGGNLGAQNLSESAAVK+56.063	tr|K7EN27|K7EN27_HUMAN;sp|Q99497|PARK7_HUMAN	15110038	7.82364e+06	2196464	7297748	1.08889e+06	2136479	0	FALSE
+56.063ATNESEDEIPQLVPIGK+56.063	tr|J3QSV6|J3QSV6_HUMAN;sp|O76021|RL1D1_HUMAN;sp|O76021-2|RL1D1_HUMAN	371894816	183308176	22093538	173571904	41274916	93635152	0	FALSE
+56.063LNNPGSTVFTEDC+57.021NILLK+56.063	sp|P26358|DNMT1_HUMAN;sp|P26358-2|DNMT1_HUMAN;sp|P26358-3|DNMT1_HUMAN	20053158	8779369	2.8884e+06	7390621	660144	3594729	0	FALSE
+56.063ASLEDAPVDDLTR	tr|C9J6P4|C9J6P4_HUMAN;sp|Q7Z2W4|ZCCHV_HUMAN;sp|Q7Z2W4-2|ZCCHV_HUMAN;sp|Q7Z2W4-3|ZCCHV_HUMAN	26454418	15070689	1725573	17425628	1.20692e+06	3.93241e+06	0	FALSE
+56.063EC+57.021SLQVPEDELVSTLK+56.063	tr|F8WB70|F8WB70_HUMAN;tr|Q5HY81|Q5HY81_HUMAN;sp|P11441|UBL4A_HUMAN	19401416	8965513	1.42704e+06	10435180	3078818	4809121	0	FALSE
+56.063EVDEQMLNVQNK+56.063	tr|Q5ST81|Q5ST81_HUMAN;tr|Q5JP53|Q5JP53_HUMAN;sp|P07437|TBB5_HUMAN;sp|Q13885|TBB2A_HUMAN;sp|P68371|TBB4B_HUMAN;sp|Q9BVA1|TBB2B_HUMAN	170857280	84807520	9515260	88007216	993769	31570602	0	FALSE
+56.063SAMPFTASPASSTTAR	sp|O00151|PDLI1_HUMAN	32488568	14268919	9373983	9765197	6.84794e+06	5373908	0	FALSE
+56.063TVTAM+15.995DVVYALK+56.063	sp|P62805|H4_HUMAN	25508486	12645606	683915	13460488	1.83433e+06	6775781	0	FALSE
+56.063AVASQLDC+57.021NFLK+56.063	tr|A0A087X2I1|A0A087X2I1_HUMAN;tr|H0YJC0|H0YJC0_HUMAN;tr|H0YJS8|H0YJS8_HUMAN;sp|P62333|PRS10_HUMAN	29511658	14057861	5961720	16297334	17385396	9895266	0	FALSE
+56.063ALTVPELTQQVFDAK+56.063	tr|Q5ST81|Q5ST81_HUMAN;tr|Q5JP53|Q5JP53_HUMAN;sp|P07437|TBB5_HUMAN	1415658752	712246400	81761144	662994048	136969376	265511072	0	FALSE
+56.063AITIAGIPQSIIEC+57.021VK+56.063	tr|F8VZX2|F8VZX2_HUMAN;tr|F8VXH9|F8VXH9_HUMAN;tr|H3BRU6|H3BRU6_HUMAN;tr|F8VRH0|F8VRH0_HUMAN;sp|Q15366|PCBP2_HUMAN;sp|Q15366-2|PCBP2_HUMAN;sp|Q15366-3|PCBP2_HUMAN;sp|Q15366-4|PCBP2_HUMAN;sp|Q15366-5|PCBP2_HUMAN;sp|Q15366-6|PCBP2_HUMAN;sp|Q15366-7|PCBP2_HUMAN;sp|Q15366-8|PCBP2_HUMAN	57466564	29576628	3.2075e+06	32527378	5.6531e+06	13522698	0	FALSE
+56.063TGIDQLVVTPISQAQAK+56.063	tr|F5H658|F5H658_HUMAN;sp|Q14562|DHX8_HUMAN	30562434	15906310	5.03839e+06	17063392	3.18148e+06	9920555	0	FALSE
+56.063ILLAEVPTM+15.995AVEK+56.063	tr|A0A2R8YEZ4|A0A2R8YEZ4_HUMAN;tr|A0A2R8Y8D6|A0A2R8Y8D6_HUMAN;tr|A0A2R8Y5D3|A0A2R8Y5D3_HUMAN;tr|A0A2R8YEY5|A0A2R8YEY5_HUMAN;tr|H0Y723|H0Y723_HUMAN;tr|D6RDJ3|D6RDJ3_HUMAN;tr|E7EQB9|E7EQB9_HUMAN;sp|O15160|RPAC1_HUMAN;sp|O15160-2|RPAC1_HUMAN	20972070	7.72113e+06	1145459	7395639	929328	3.42723e+06	0	FALSE
+56.063TYADYESVNEC+57.021M+15.995EGVC+57.021K+56.063	tr|G3V279|G3V279_HUMAN;sp|P84090|ERH_HUMAN	27029308	12270197	1.63063e+06	13343272	2.18681e+06	4.50332e+06	0	FALSE
+56.063TSFPEDTVITYK+56.063	tr|B1AP13|B1AP13_HUMAN;tr|H3BLV0|H3BLV0_HUMAN;tr|B1AP15|B1AP15_HUMAN;tr|H7BY55|H7BY55_HUMAN;sp|P08174|DAF_HUMAN;sp|P08174-2|DAF_HUMAN;sp|P08174-3|DAF_HUMAN;sp|P08174-4|DAF_HUMAN;sp|P08174-5|DAF_HUMAN;sp|P08174-6|DAF_HUMAN;sp|P08174-7|DAF_HUMAN	116833744	59118460	3.94552e+06	447397152	193628160	57736948	0	FALSE
+56.063LC+57.021EQGINPEALSSVIK+56.063	sp|Q08AG7|MZT1_HUMAN	14761867	8813229	1.29719e+06	8.0812e+06	2.1682e+06	3.43678e+06	0	FALSE
+56.063DYVAPTANLDQK+56.063	sp|Q7KZF4|SND1_HUMAN	36906328	18053006	5.74132e+06	11027470	3.76109e+06	9779536	0	FALSE
+56.063YTQSNSVC+57.021YAK+56.063	tr|H7C1S2|H7C1S2_HUMAN;sp|P31939|PUR9_HUMAN;sp|P31939-2|PUR9_HUMAN	44708004	19252122	6.44971e+06	33294700	9483129	9693395	0	FALSE
+56.063TTTLSGTAPAAGVVPSR	tr|E7EVA0|E7EVA0_HUMAN;tr|F8W9U4|F8W9U4_HUMAN;tr|H7C4C5|H7C4C5_HUMAN;tr|B5MEG9|B5MEG9_HUMAN;tr|H0Y2V1|H0Y2V1_HUMAN;sp|P27816|MAP4_HUMAN;sp|P27816-2|MAP4_HUMAN;sp|P27816-4|MAP4_HUMAN;sp|P27816-5|MAP4_HUMAN;sp|P27816-6|MAP4_HUMAN	247401840	144658832	24631572	152179104	31899236	58879728	0	FALSE
+56.063SNVSDAVAQSTR	sp|P60174|TPIS_HUMAN;sp|P60174-1|TPIS_HUMAN;sp|P60174-4|TPIS_HUMAN	791569344	420550048	49341784	454926144	88364848	177688928	0.000969982	FALSE
+56.063AFDC+57.021PETEYPVK+56.063	tr|B1AKJ5|B1AKJ5_HUMAN;tr|F5H7V1|F5H7V1_HUMAN;tr|G3V1R5|G3V1R5_HUMAN;sp|O43847|NRDC_HUMAN;sp|O43847-2|NRDC_HUMAN	17204106	16139074	6278873	8797229	5432551	5.68394e+06	0	FALSE
+56.063LLQSNPVLEAFGNAK+56.063	tr|I3L501|I3L501_HUMAN;tr|F5H6E2|F5H6E2_HUMAN;tr|I3L3Y6|I3L3Y6_HUMAN;tr|I3L204|I3L204_HUMAN;sp|O00159|MYO1C_HUMAN;sp|O00159-2|MYO1C_HUMAN;sp|O00159-3|MYO1C_HUMAN	6.81305e+06	3.44721e+06	1.01437e+06	3495821	810473	1.58333e+06	0	FALSE
+56.063LVYLVENPGGYVAYSK+56.063	tr|G3V0E5|G3V0E5_HUMAN;sp|P02786|TFR1_HUMAN	72738136	43255224	9589074	34135836	5992722	14728265	0	FALSE
+56.063AVVPPISLSTTFK+56.063	sp|P32929|CGL_HUMAN;sp|P32929-2|CGL_HUMAN;sp|P32929-3|CGL_HUMAN	35402008	16995460	666312	17524796	2.35509e+06	8488747	0	FALSE
+56.063VIVVGNPANTNC+57.021LTASK+56.063	tr|B9A041|B9A041_HUMAN;tr|C9JF79|C9JF79_HUMAN;tr|C9JRL4|C9JRL4_HUMAN;sp|P40925|MDHC_HUMAN;sp|P40925-2|MDHC_HUMAN;sp|P40925-3|MDHC_HUMAN	0	38287780	8980714	17529080	51364032	84743504	0	FALSE
+56.063DASLMVTNDGATILK+56.063	tr|F5GWF6|F5GWF6_HUMAN;tr|F8VQ14|F8VQ14_HUMAN;sp|P78371|TCPB_HUMAN;sp|P78371-2|TCPB_HUMAN	28226418	12975247	1928039	13661799	1.71039e+06	5.12449e+06	0	FALSE
+56.063IC+57.021EQFEAETPTDSETTQK+56.063	tr|Q5QNY5|Q5QNY5_HUMAN;tr|G3V3G9|G3V3G9_HUMAN;tr|H0YDY4|H0YDY4_HUMAN;tr|H0YJ60|H0YJ60_HUMAN;sp|P40855|PEX19_HUMAN;sp|P40855-5|PEX19_HUMAN	24104710	9865819	3.20935e+06	8962255	4.08008e+06	4.19083e+06	0	FALSE
+56.063IINEPTAAAIAYGLDR	tr|A0A0G2JIW1|A0A0G2JIW1_HUMAN;sp|P0DMV9|HS71B_HUMAN;sp|P17066|HSP76_HUMAN;sp|P0DMV8|HS71A_HUMAN;sp|P0DMV8-2|HS71A_HUMAN	482473888	249858976	28047450	256610752	49991656	123592312	0	FALSE
+56.063ASAAFSSVGSVITK+56.063	tr|H0YC42|H0YC42_HUMAN;sp|P55327|TPD52_HUMAN;sp|P55327-2|TPD52_HUMAN;sp|P55327-3|TPD52_HUMAN;sp|P55327-4|TPD52_HUMAN;sp|P55327-5|TPD52_HUMAN;sp|P55327-6|TPD52_HUMAN;sp|P55327-7|TPD52_HUMAN	29256158	11613764	2.42698e+06	18173188	9448169	6541129	0	FALSE
+56.063GC+57.021ITIIGGGDTATC+57.021C+57.021AK+56.063	sp|P00558|PGK1_HUMAN;sp|P00558-2|PGK1_HUMAN	520356480	266421520	29600580	308286784	58938624	108547704	0	FALSE
+56.063ELAPAVSVLQLFC+57.021SSPK+56.063	sp|Q9UBF2|COPG2_HUMAN;sp|Q9UBF2-2|COPG2_HUMAN;sp|Q9Y678|COPG1_HUMAN	364866	154097	71117.6	143659	68704.2	58415.2	0	FALSE
+56.063TPTC+57.021QSSTDC+57.021SPYAR	sp|O95235|KI20A_HUMAN;sp|O95235-2|KI20A_HUMAN	5.84446e+06	2.87282e+06	217903	3.6706e+06	615916	1.50666e+06	0.000969982	FALSE
+56.063NVMILTNPVAAK+56.063	tr|F8W7T0|F8W7T0_HUMAN;sp|Q9UGI8|TES_HUMAN;sp|Q9UGI8-2|TES_HUMAN	8.31443e+06	3043137	540998	2887646	270923	222833	0	FALSE
+56.063IQAYDYLEC+57.021SAK+56.063	sp|P62745|RHOB_HUMAN	17762430	9562693	572188	11471944	1.53528e+06	4.70439e+06	0	FALSE
+56.063C+57.021VANNQVETLEK+56.063	sp|P42704|LPPRC_HUMAN	60808648	30361768	2.86811e+06	34360016	5293978	21659104	0	FALSE
+56.063AAPQPLNLVSSVTLSK+56.063	tr|A0A3B3IT66|A0A3B3IT66_HUMAN;tr|A0A3B3IRS5|A0A3B3IRS5_HUMAN;tr|A0A3B3IUB6|A0A3B3IUB6_HUMAN;tr|A0A3B3IST0|A0A3B3IST0_HUMAN;tr|A0A3B3IST6|A0A3B3IST6_HUMAN;tr|A0A3B3IS87|A0A3B3IS87_HUMAN;tr|A0A3B3IRW5|A0A3B3IRW5_HUMAN;tr|A0A3B3IT14|A0A3B3IT14_HUMAN;tr|C9J0F0|C9J0F0_HUMAN;tr|H0Y882|H0Y882_HUMAN;tr|A0A3B3ISQ6|A0A3B3ISQ6_HUMAN;tr|A0A3B3IS20|A0A3B3IS20_HUMAN;tr|A0A0B4J2F3|A0A0B4J2F3_HUMAN;tr|G5E965|G5…	8623248	3.40789e+06	417666	2.82838e+06	1.23741e+06	1.51813e+06	0	FALSE
+56.063LAETQEEISAEVAAK+56.063	tr|A0A0A6YYJ8|A0A0A6YYJ8_HUMAN;sp|Q96HJ9-2|FMC1_HUMAN;sp|Q9Y383|LC7L2_HUMAN;sp|Q9Y383-2|LC7L2_HUMAN;sp|Q9Y383-3|LC7L2_HUMAN	57539824	33224964	2818104	27707392	9420742	22520622	0	FALSE
+56.063AAAYSAQVQPVDGATR	tr|A0A3B3IRR6|A0A3B3IRR6_HUMAN;tr|A0A3B3ITA3|A0A3B3ITA3_HUMAN;tr|A0A3B3IT54|A0A3B3IT54_HUMAN;sp|Q9H7E9|CH033_HUMAN;sp|Q9H7E9-2|CH033_HUMAN	83499520	42871236	4746161	43334164	7.69868e+06	17461310	0	FALSE
+56.063YAIC+57.021SALAASALPALVM+15.995SK+56.063	tr|H3BM89|H3BM89_HUMAN;tr|H3BTP7|H3BTP7_HUMAN;sp|P36578|RL4_HUMAN	39094264	19523598	1.07281e+06	11692295	3.00663e+06	120917	0	FALSE
+56.063NTGIIC+57.021TIGPASR	tr|B4DNK4|B4DNK4_HUMAN;tr|H3BQ34|H3BQ34_HUMAN;tr|H3BU13|H3BU13_HUMAN;tr|H3BTJ2|H3BTJ2_HUMAN;tr|H3BT25|H3BT25_HUMAN;tr|H3BTN5|H3BTN5_HUMAN;tr|H3BUW1|H3BUW1_HUMAN;sp|P14618|KPYM_HUMAN;sp|P14618-2|KPYM_HUMAN	176587696	92159344	10835086	97115592	20548388	37906648	0	FALSE
+56.063VDFPQDQLTALTGR	tr|G3XAL0|G3XAL0_HUMAN;sp|P40926|MDHM_HUMAN;sp|P40926-2|MDHM_HUMAN	129497736	70123256	11217560	72502680	14275091	42913240	0	FALSE
+56.063LTALQAQPGSIVPTLVLAESLPGATTR	sp|Q96IR7|HPDL_HUMAN	574426	508014	171542	380953	305863	183696	0	FALSE
+56.063GLEFLSVPSTYYK+56.063	tr|A0A0B4J1R4|A0A0B4J1R4_HUMAN;sp|P32754|HPPD_HUMAN;sp|P32754-2|HPPD_HUMAN	5.7254e+06	2657991	516528	1.34108e+06	580853	520054	0	FALSE
+56.063YVEPIEDVPC+57.021GNIVGLVGVDQFLVK+56.063	sp|P13639|EF2_HUMAN	506380	286841	339344	1.78745e+06	559084	293480	0	FALSE
+56.063VLSVPESTPFTAVLK+56.063	tr|H0Y614|H0Y614_HUMAN;sp|P61960|UFM1_HUMAN	30411642	15126155	1.8763e+06	14171262	2.80398e+06	7645252	0	FALSE
+56.063VYAVATSTNTPC+57.021AR	sp|Q10570|CPSF1_HUMAN	6559034	3024792	329549	3.05991e+06	841007	613443	0.000969982	FALSE
+56.063DFLAGGVAAAISK+56.063	sp|P05141|ADT2_HUMAN	1.68265e+06	859003	773044	792859	203488	374058	0	FALSE
+56.063YAIC+57.021SALAASALPALVM+15.995SK+56.063	tr|H3BM89|H3BM89_HUMAN;tr|H3BTP7|H3BTP7_HUMAN;sp|P36578|RL4_HUMAN	5.21527e+06	2369344	913603	2.31414e+06	789233	852444	0	FALSE
+56.063AITGASLADIMAK+56.063	tr|C9JNW5|C9JNW5_HUMAN;tr|C9JXB8|C9JXB8_HUMAN;sp|P83731|RL24_HUMAN	13704001	8191346	1.21742e+06	7515967	784851	2810287	0	FALSE
+56.063EQGPYETYEGSPVSK+56.063	tr|E9PL69|E9PL69_HUMAN;sp|P23921|RIR1_HUMAN	61647740	37059136	3.85424e+06	27905034	6295999	13785134	0.000969982	FALSE
+56.063AAEC+57.021NIVVTQPR	sp|Q08211|DHX9_HUMAN	674452544	308879520	45508860	335380192	65914452	155756944	0	FALSE
+56.063VAPPGLTQIPQIQK+56.063	tr|V9GYR2|V9GYR2_HUMAN;sp|P05026|AT1B1_HUMAN;sp|P05026-2|AT1B1_HUMAN	81851576	41591876	4.92423e+06	45895572	8814838	21279010	0	FALSE
+56.063TFVSGAC+57.021DASSK+56.063	tr|H7C5J5|H7C5J5_HUMAN;sp|Q9HAV0|GBB4_HUMAN	12219405	8961616	41297344	12929775	4981246	7184789	0	FALSE
+56.063NQSFC+57.021PTVNLDK+56.063	tr|E9PJD9|E9PJD9_HUMAN;tr|E9PLL6|E9PLL6_HUMAN;sp|P46776|RL27A_HUMAN	29762428	13920573	2.39701e+06	15943645	2.432e+06	8.22358e+06	0	FALSE
+56.063ADTQTYQPYNK+56.063	sp|P84090|ERH_HUMAN	29491500	14435686	825837	13816108	1.92488e+06	7.88154e+06	0	FALSE
+56.063ISM+15.995SEVDLNVAAPK+56.063	sp|Q09666|AHNK_HUMAN	29332294	13531747	644136	11961433	791456	6.57897e+06	0	FALSE
+56.063DEILPTTPISEQK+56.063	tr|H0YEU2|H0YEU2_HUMAN;tr|E9PL09|E9PL09_HUMAN;tr|E9PSF4|E9PSF4_HUMAN;tr|E9PPU1|E9PPU1_HUMAN;sp|P23396|RS3_HUMAN;sp|P23396-2|RS3_HUMAN	110426808	53889288	7.25668e+06	55512152	9357929	30655148	0	FALSE
+56.063ILGIPVIVTEQYPK+56.063	tr|D6RGE2|D6RGE2_HUMAN;sp|Q96CN7|ISOC1_HUMAN	7345024	3.57409e+06	0	2.59305e+06	458207	320896	0	FALSE
+56.063AFYPEEISSM+15.995VLTK+56.063	tr|A0A0G2JIW1|A0A0G2JIW1_HUMAN;tr|Q53FA3|Q53FA3_HUMAN;sp|P0DMV9|HS71B_HUMAN;sp|P34931|HS71L_HUMAN;sp|P0DMV8|HS71A_HUMAN	4.07493e+06	4.63031e+06	1.24267e+06	1.89326e+06	1.17997e+06	2169668	0.000969982	FALSE
+56.063IYQIYEGTSQIQR	tr|Q5T4U5|Q5T4U5_HUMAN;tr|B7Z9I1|B7Z9I1_HUMAN;sp|P11310|ACADM_HUMAN;sp|P11310-2|ACADM_HUMAN	56161496	28654334	3745562	32836990	3756925	15916143	0	FALSE
+56.063AQIFANTVDNAR	tr|F8VZY9|F8VZY9_HUMAN;sp|P05783|K1C18_HUMAN	99074136	53259828	4769197	58597664	11402781	41248768	0	FALSE
+56.063IAVYSC+57.021PFDGM+15.995ITETK+56.063	sp|P50990|TCPQ_HUMAN;sp|P50990-2|TCPQ_HUMAN;sp|P50990-3|TCPQ_HUMAN	35834276	26862754	2.31575e+06	22993460	10522042	30591800	0	FALSE
+56.063SVSAFAPIC+57.021NPVLC+57.021PWGK+56.063	tr|H7BZT7|H7BZT7_HUMAN;tr|U3KQT1|U3KQT1_HUMAN;tr|X6RA14|X6RA14_HUMAN;sp|P10768|ESTD_HUMAN	1.99992e+06	914684	378146	900912	420079	615518	0	FALSE
+56.063AAVPSGASTGIYEALELR	tr|E5RI09|E5RI09_HUMAN;tr|K7ERS8|K7ERS8_HUMAN;tr|K7EM90|K7EM90_HUMAN;tr|A0A2R8Y798|A0A2R8Y798_HUMAN;tr|A0A2R8YEG5|A0A2R8YEG5_HUMAN;tr|A0A2R8Y879|A0A2R8Y879_HUMAN;tr|A0A2R8Y6G6|A0A2R8Y6G6_HUMAN;tr|E5RGZ4|E5RGZ4_HUMAN;tr|A0A2R8YEM5|A0A2R8YEM5_HUMAN;tr|E5RG95|E5RG95_HUMAN;tr|K7EKN2|K7EKN2_HUMAN;tr|F5H0C8|F5H0C8_HUMAN;tr|K7EPM1|K7EPM1_HUMAN;tr|F5H1C3|F5H1C3_HUMAN;sp|P13929|ENOB_HUMAN;sp|P13929-2|ENOB…	90527152	47674216	5.75103e+06	48358940	9732714	23316390	0	FALSE
+56.063STTTSDPPNIC+57.021K+56.063	tr|A0A2R8Y7F4|A0A2R8Y7F4_HUMAN;tr|A0A2R8YET2|A0A2R8YET2_HUMAN;tr|E7EPN9|E7EPN9_HUMAN;tr|H7C5N8|H7C5N8_HUMAN;sp|Q9Y520|PRC2C_HUMAN;sp|Q9Y520-2|PRC2C_HUMAN;sp|Q9Y520-3|PRC2C_HUMAN;sp|Q9Y520-4|PRC2C_HUMAN;sp|Q9Y520-5|PRC2C_HUMAN;sp|Q9Y520-6|PRC2C_HUMAN;sp|Q9Y520-7|PRC2C_HUMAN	45552520	23280396	1.36572e+06	18825538	1.91497e+06	10627382	0	FALSE
+56.063AVC+57.021MLSNTTAIAEAWAR	tr|C9J2C0|C9J2C0_HUMAN;tr|V9GZ17|V9GZ17_HUMAN;sp|P68363|TBA1B_HUMAN;sp|P68363-2|TBA1B_HUMAN;sp|Q9NY65|TBA8_HUMAN;sp|Q9NY65-2|TBA8_HUMAN;sp|P68366|TBA4A_HUMAN;sp|P68366-2|TBA4A_HUMAN;sp|P0DPH7|TBA3C_HUMAN;sp|P0DPH7-2|TBA3C_HUMAN;sp|P0DPH8|TBA3D_HUMAN;sp|Q6PEY2|TBA3E_HUMAN;sp|Q71U36|TBA1A_HUMAN;sp|Q71U36-2|TBA1A_HUMAN	18249890	9764286	18100070	5665577	15076228	15454843	0.000969982	FALSE
+56.063YSESLLGVPIAYDNIK+56.063	sp|Q3B726|RPA43_HUMAN	5.45372e+06	2961032	803557	3.02403e+06	642238	1.44175e+06	0	FALSE
+56.063GTIQVITQGTSLK+56.063	tr|A0A2C9F2M7|A0A2C9F2M7_HUMAN;tr|A0A286YF22|A0A286YF22_HUMAN;sp|O43175|SERA_HUMAN	168995648	93850920	9034153	100085840	21671498	53880072	0	FALSE
+56.063ASATSVSSAGEQAAGDPEGR	tr|A0A2R8YFI4|A0A2R8YFI4_HUMAN;tr|V9GYZ0|V9GYZ0_HUMAN;sp|Q9BZ23|PANK2_HUMAN;sp|Q9BZ23-3|PANK2_HUMAN;sp|Q9BZ23-4|PANK2_HUMAN	6821747	3962417	640956	4.40027e+06	3728047	932808	0	FALSE
+56.063GSYGDLGGPIITTQVTIPK+56.063	tr|Q5T6W2|Q5T6W2_HUMAN;tr|S4R359|S4R359_HUMAN;sp|P61978|HNRPK_HUMAN;sp|P61978-2|HNRPK_HUMAN;sp|P61978-3|HNRPK_HUMAN	1092111232	545475712	60607048	505404608	104559464	257620560	0	FALSE
+56.063VVTSEDQVQEGTK+56.063	tr|C9J7Y4|C9J7Y4_HUMAN;sp|Q8WWK9|CKAP2_HUMAN;sp|Q8WWK9-4|CKAP2_HUMAN;sp|Q8WWK9-6|CKAP2_HUMAN;sp|Q8WWK9-5|CKAP2_HUMAN	6.50995e+06	1.70414e+06	113146	1.75134e+06	553550	477860	0	FALSE
+56.063IVSLPEC+57.021FNSPYGAK+56.063	tr|H7C579|H7C579_HUMAN;tr|F8WF70|F8WF70_HUMAN;sp|Q9NQR4|NIT2_HUMAN	26248850	11398083	1.10971e+06	13431252	1.88515e+06	3.49941e+06	0	FALSE
+56.063TPVTDPATGAVK+56.063	sp|P49748|ACADV_HUMAN;sp|P49748-2|ACADV_HUMAN;sp|P49748-3|ACADV_HUMAN	65889544	34097508	897254	35429500	4463112	19459104	0	FALSE
+56.063TLLLC+57.021GYPNVGK+56.063	tr|Q5T3R7|Q5T3R7_HUMAN;sp|Q9BZE4|NOG1_HUMAN;sp|Q9BZE4-2|NOG1_HUMAN;sp|Q9BZE4-3|NOG1_HUMAN	20738158	11045839	7719540	11328743	2.04767e+06	5053720	0	FALSE
+56.063NSNPALNDNLEK+56.063	sp|O00299|CLIC1_HUMAN	145271472	70284920	6428040	86311408	15006497	32570096	0	FALSE
+56.063VSDATGQM+15.995NLTK+56.063	sp|P40121|CAPG_HUMAN;sp|P40121-2|CAPG_HUMAN	37861904	21152600	4.01872e+06	17535504	3220740	9822949	0	FALSE
+56.063QALQSTPLGSSSK+56.063	tr|F1T0I1|F1T0I1_HUMAN;sp|O15027|SC16A_HUMAN;sp|O15027-2|SC16A_HUMAN;sp|O15027-3|SC16A_HUMAN;sp|O15027-4|SC16A_HUMAN;sp|O15027-5|SC16A_HUMAN	38118968	18781418	1.80242e+06	18194370	2590455	9073229	0	FALSE
+56.063QTNLENLDQAFSVAER	tr|H0YDN1|H0YDN1_HUMAN;tr|E9PMV1|E9PMV1_HUMAN;sp|Q15149|PLEC_HUMAN;sp|Q15149-2|PLEC_HUMAN;sp|Q15149-3|PLEC_HUMAN;sp|Q15149-4|PLEC_HUMAN;sp|Q15149-5|PLEC_HUMAN;sp|Q15149-6|PLEC_HUMAN;sp|Q15149-7|PLEC_HUMAN;sp|Q15149-8|PLEC_HUMAN;sp|Q15149-9|PLEC_HUMAN	11496425	2.38355e+06	1.38828e+06	3518687	2060872	2.19055e+06	0.000969982	FALSE
+56.063GASQAGM+15.995TGYGMPR	tr|C9J5W6|C9J5W6_HUMAN;sp|P37802|TAGL2_HUMAN;sp|P37802-2|TAGL2_HUMAN;sp|Q9UI15|TAGL3_HUMAN	25039804	12163679	678780	12304643	1.76212e+06	3.52307e+06	0	FALSE
+56.063TNLIVNYLPQNM+15.995TQDELR	tr|M0QZR9|M0QZR9_HUMAN;sp|Q15717|ELAV1_HUMAN;sp|Q15717-2|ELAV1_HUMAN	17127628	9371763	1.61325e+06	7.91705e+06	2.31657e+06	4.91551e+06	0.000969982	FALSE
+56.063LEQPDPGAVAAAAILR	sp|Q3LXA3|TKFC_HUMAN	4.37897e+06	1.49899e+06	218013	2.61252e+06	475655	986118	0	FALSE
+56.063ILLTEPPM+15.995NPTK+56.063	tr|F5H6T1|F5H6T1_HUMAN;sp|P61160|ARP2_HUMAN;sp|P61160-2|ARP2_HUMAN	51013068	21750420	10405967	22419998	3.56853e+06	12869010	0	FALSE
+56.063VIDPATATSVDLR	sp|P50991|TCPD_HUMAN;sp|P50991-2|TCPD_HUMAN	27552044	13905088	857855	18083516	4296172	8057274	0	FALSE
+56.063VLVQNAAGSQEK+56.063	sp|Q9Y490|TLN1_HUMAN	99820280	46557676	4.37388e+06	50823040	8181719	26710826	0	FALSE
+56.063TDYNASVSVPDSSGPER	tr|Q5T6W2|Q5T6W2_HUMAN;sp|P61978|HNRPK_HUMAN;sp|P61978-2|HNRPK_HUMAN;sp|P61978-3|HNRPK_HUMAN	1.74462e+06	1.15733e+06	1057612	0	220438	264612	0.000969982	FALSE
+56.063YMPQNPC+57.021IIATK+56.063	sp|Q09028|RBBP4_HUMAN;sp|Q09028-2|RBBP4_HUMAN;sp|Q09028-3|RBBP4_HUMAN;sp|Q09028-4|RBBP4_HUMAN	39294236	8234083	19048934	29207612	20670408	11665786	0	FALSE
+56.063QQPDTEAVLNGK+56.063	tr|E9PMI6|E9PMI6_HUMAN;tr|J3KN38|J3KN38_HUMAN;tr|E9PJF4|E9PJF4_HUMAN;tr|E9PQ83|E9PQ83_HUMAN;sp|P54105|ICLN_HUMAN	33087148	11467053	8976222	16943652	3.95714e+06	8553634	0.000969982	FALSE
+56.063STLQTLPEIVAK+56.063	sp|O95202|LETM1_HUMAN	19329272	6.96668e+06	2.41723e+06	9635339	3.72612e+06	6.22281e+06	0	FALSE
+56.063TLTTMAPYLSTEDVPLAR	tr|H0YN14|H0YN14_HUMAN;sp|Q8TEX9|IPO4_HUMAN;sp|Q8TEX9-2|IPO4_HUMAN	3.39325e+06	452408	1402645	941712	721473	1.01543e+06	0.000969982	FALSE
+56.063SC+57.021MLTGTPESVQSAK+56.063	tr|C9JSZ1|C9JSZ1_HUMAN;tr|E9PEB5|E9PEB5_HUMAN;sp|Q96AE4|FUBP1_HUMAN;sp|Q96AE4-2|FUBP1_HUMAN	29979030	14588363	12424359	19576908	1563354	6403152	0	FALSE
+56.063LPAYFVVPTPLPEENVQR	sp|Q9C0I1|MTMRC_HUMAN;sp|Q9C0I1-2|MTMRC_HUMAN;sp|Q9C0I1-3|MTMRC_HUMAN	7246541	4.46116e+06	646276	4.2719e+06	599741	2.42429e+06	0.000969982	FALSE
+56.063GQSPAGDGSPEPPTPR	tr|A0A0A0MRW6|A0A0A0MRW6_HUMAN;sp|Q9H6R4|NOL6_HUMAN;sp|Q9H6R4-2|NOL6_HUMAN;sp|Q9H6R4-3|NOL6_HUMAN;sp|Q9H6R4-4|NOL6_HUMAN	34423192	16255225	800894	13859866	5627576	15264084	0	FALSE
+56.063VLQDM+15.995GLPTGAEGR	sp|Q12906|ILF3_HUMAN;sp|Q12906-2|ILF3_HUMAN;sp|Q12906-3|ILF3_HUMAN;sp|Q12906-4|ILF3_HUMAN;sp|Q12906-5|ILF3_HUMAN;sp|Q12906-6|ILF3_HUMAN;sp|Q12906-7|ILF3_HUMAN	9461616	4980948	2.44721e+06	4.39904e+06	2.77875e+06	1.43071e+06	0	FALSE
+56.063C+57.021IPALDSLTPANEDQK+56.063	sp|P10809|CH60_HUMAN	247964448	122718192	20385412	137515248	387803296	229350432	0	FALSE
+56.063FVVDLSDQVAPTDIEEGM+15.995R	tr|A0A1W2PQS1|A0A1W2PQS1_HUMAN;sp|P35998|PRS7_HUMAN	10607385	5237075	965614	4273255	1.10625e+06	1.84701e+06	0	FALSE
+56.063DISEASVFDAYVLPK+56.063	sp|P62854|RS26_HUMAN	1.99857e+06	781049	953739	1.18876e+06	1.66601e+06	1.06851e+06	0	FALSE
+56.063TILEEEITPTIQK+56.063	tr|Q5T821|Q5T821_HUMAN;sp|O95347|SMC2_HUMAN;sp|O95347-2|SMC2_HUMAN	26287600	4579610	700239	13666967	1.61043e+06	3.77304e+06	0	FALSE
+56.063TTPSYVAFTDTER	tr|A0A0G2JIW1|A0A0G2JIW1_HUMAN;tr|E9PN25|E9PN25_HUMAN;tr|E9PKE3|E9PKE3_HUMAN;tr|E9PNE6|E9PNE6_HUMAN;tr|E9PQQ4|E9PQQ4_HUMAN;tr|E9PI65|E9PI65_HUMAN;tr|E9PLF4|E9PLF4_HUMAN;tr|E9PPY6|E9PPY6_HUMAN;tr|E9PK54|E9PK54_HUMAN;tr|E9PQK7|E9PQK7_HUMAN;tr|Q53FA3|Q53FA3_HUMAN;sp|P0DMV9|HS71B_HUMAN;sp|P54652|HSP72_HUMAN;sp|P17066|HSP76_HUMAN;sp|P11142|HSP7C_HUMAN;sp|P11142-2|HSP7C_HUMAN;sp|P34931|HS71L_HUMAN;sp|P…	119363200	64470132	7696814	67838144	12162700	25930826	0	FALSE
+56.063TVIIEQSWGSPK+56.063	tr|E7EXB4|E7EXB4_HUMAN;tr|C9JL19|C9JL19_HUMAN;tr|C9JL25|C9JL25_HUMAN;tr|C9JCQ4|C9JCQ4_HUMAN;tr|E7ESH4|E7ESH4_HUMAN;sp|P10809|CH60_HUMAN;sp|P10809-2|CH60_HUMAN	138358272	75401152	6401967	42878148	7808440	38591620	0	FALSE
+56.063ALVQNDTLLQVK+56.063	sp|Q92522|H1X_HUMAN	36533744	17599444	640868	19235994	3.31434e+06	10273435	0.000969982	FALSE
+56.063YSSEVATESPLDFTK+56.063	sp|Q8WTT2|NOC3L_HUMAN	8607557	4.37997e+06	554390	9594338	8900461	4422325	0	FALSE
+56.063GTPPPVFTPPLPK+56.063	sp|Q6NZY4|ZCHC8_HUMAN;sp|Q6NZY4-2|ZCHC8_HUMAN	10491087	5.09268e+06	0	5728697	2.22536e+06	3.05275e+06	0	FALSE
+56.063VLALPEPSPAAPTLR	tr|H0YDN1|H0YDN1_HUMAN;sp|Q15149|PLEC_HUMAN;sp|Q15149-2|PLEC_HUMAN;sp|Q15149-3|PLEC_HUMAN;sp|Q15149-4|PLEC_HUMAN;sp|Q15149-5|PLEC_HUMAN;sp|Q15149-6|PLEC_HUMAN;sp|Q15149-7|PLEC_HUMAN;sp|Q15149-8|PLEC_HUMAN;sp|Q15149-9|PLEC_HUMAN	88614672	48898824	4.94507e+06	48811888	8608696	28571026	0	FALSE
+56.063NTDQASM+15.995PDNTAAQK+56.063	sp|P35749|MYH11_HUMAN;sp|P35749-2|MYH11_HUMAN;sp|P35749-3|MYH11_HUMAN;sp|P35749-4|MYH11_HUMAN;sp|P35579|MYH9_HUMAN;sp|P35579-2|MYH9_HUMAN	1753243	1.84898e+06	1.10036e+06	1.71036e+06	74073.1	328195	0	FALSE
+56.063ASLYNAVTIEDVQK+56.063	sp|Q9Y617|SERC_HUMAN;sp|Q9Y617-2|SERC_HUMAN	33197648	17389058	13926739	31656084	56127556	36109104	0	FALSE
+56.063IFVGGLNPEATEEK+56.063	tr|D6R9P3|D6R9P3_HUMAN;tr|D6RBZ0|D6RBZ0_HUMAN;tr|D6RD18|D6RD18_HUMAN;sp|Q99729-2|ROAA_HUMAN;sp|Q99729-3|ROAA_HUMAN	38669496	4.54407e+06	0	16069294	2.72925e+06	10000052	0	FALSE
+56.063YAAPEQNNDPQQSK+56.063	tr|A0A0A0MTB8|A0A0A0MTB8_HUMAN;sp|Q8NI36|WDR36_HUMAN	5.15749e+06	2174956	163954	2.27076e+06	321685	833340	0	FALSE
+56.063ATENDIANFFSPLNPIR	sp|P31942|HNRH3_HUMAN;sp|P31942-2|HNRH3_HUMAN;sp|P31942-3|HNRH3_HUMAN;sp|P31942-4|HNRH3_HUMAN;sp|P31942-5|HNRH3_HUMAN;sp|P31942-6|HNRH3_HUMAN	1.92256e+06	954961	117909	1.26563e+06	80059.3	731373	0	FALSE
+56.063NSLESYAFNMK+56.063	tr|A8K7Q2|A8K7Q2_HUMAN;tr|E9PKE3|E9PKE3_HUMAN;tr|E9PNE6|E9PNE6_HUMAN;tr|E9PM13|E9PM13_HUMAN;tr|E9PS65|E9PS65_HUMAN;sp|P11142|HSP7C_HUMAN	21599248	11729687	6.50379e+06	14235881	4.30194e+06	4893008	0	FALSE
+56.063LTSAVSSLPELLEK+56.063	sp|Q8WVM8|SCFD1_HUMAN;sp|Q8WVM8-2|SCFD1_HUMAN;sp|Q8WVM8-3|SCFD1_HUMAN	7996885	3872238	605809	3.80231e+06	1.53158e+06	3.09924e+06	0	FALSE
+56.063STPVTVVLPDTK+56.063	sp|Q15029|U5S1_HUMAN;sp|Q15029-2|U5S1_HUMAN;sp|Q15029-3|U5S1_HUMAN	260570960	124272952	9731665	123552208	22213092	66380508	0	FALSE
+56.063GTPAGTTPGASQAPK+56.063	sp|Q8IVT2|MISP_HUMAN	38681232	18066008	1.5932e+06	16570781	3.19367e+06	7.84891e+06	0	FALSE
+56.063AEQEEEFISNTLFK+56.063	sp|Q16204|CCDC6_HUMAN	7720265	3.49421e+06	1.46956e+06	4.17753e+06	2.59422e+06	3.37302e+06	0	FALSE
+56.063VIVDFSSPNIAK+56.063	sp|P54136|SYRC_HUMAN;sp|P54136-2|SYRC_HUMAN	33362132	16810994	452085	16445248	3.84971e+06	7.88682e+06	0.000969982	FALSE
+56.063VALSPAGVQNLVK+56.063	tr|D6RHU2|D6RHU2_HUMAN;tr|D6RAI5|D6RAI5_HUMAN;sp|Q13423|NNTM_HUMAN	9081057	5041855	3.22495e+06	4.77581e+06	2.71382e+06	2.60467e+06	0	FALSE
+58.075VLPPEVADGGVVDSGVYAVPPPAER	tr|A0A2R8Y6M6|A0A2R8Y6M6_HUMAN;tr|A0A2R8Y4C2|A0A2R8Y4C2_HUMAN;tr|A0A2R8Y8C4|A0A2R8Y8C4_HUMAN;tr|A0A2R8YFS8|A0A2R8YFS8_HUMAN;tr|A0A2R8Y5E4|A0A2R8Y5E4_HUMAN;tr|A0A2R8Y5C9|A0A2R8Y5C9_HUMAN;tr|A0A2R8YFK2|A0A2R8YFK2_HUMAN;tr|A0A2R8Y596|A0A2R8Y596_HUMAN;sp|P56945|BCAR1_HUMAN;sp|P56945-2|BCAR1_HUMAN;sp|P56945-3|BCAR1_HUMAN;sp|P56945-4|BCAR1_HUMAN;sp|P56945-5|BCAR1_HUMAN;sp|P56945-6|BCAR1_HUMAN;sp|P56945…	15338320	14428250	13242614	7637314	7.81806e+06	0	0	FALSE
+56.063VVPINTPTAAVDQTLFPGK+56.063	tr|E9PDU5|E9PDU5_HUMAN;tr|A0A087X295|A0A087X295_HUMAN;sp|Q9NNW5|WDR6_HUMAN	14488199	8474242	1.03268e+06	8089735	701239	3.933e+06	0	FALSE
+56.063TGAIVDVPVGEELLGR	tr|K7EQH4|K7EQH4_HUMAN;tr|K7EK77|K7EK77_HUMAN;tr|K7ERX7|K7ERX7_HUMAN;tr|K7EJP1|K7EJP1_HUMAN;sp|P25705|ATPA_HUMAN;sp|P25705-2|ATPA_HUMAN	240692720	130062856	18370670	147799536	30188874	80777568	0	FALSE
+56.063AALLEAGMPEC+57.021TEDK+56.063	tr|K7ES11|K7ES11_HUMAN;sp|Q9C0C9|UBE2O_HUMAN	1.3562e+06	1.55007e+06	1208387	1108200	1.51753e+06	598562	0	FALSE
+56.063NAVITVPAYFNDSQR	sp|P38646|GRP75_HUMAN	194402288	384190208	28741982	54759376	54857964	26571908	0	FALSE
+56.063AEEYEFLTPVEEAPK+56.063	tr|J3QQX2|J3QQX2_HUMAN;tr|J3KTF8|J3KTF8_HUMAN;tr|J3KRE2|J3KRE2_HUMAN;sp|P52565|GDIR1_HUMAN	503859584	264845888	28677756	250879312	49796096	121571904	0	FALSE
+56.063TIYAGNALC+57.021TVK+56.063	tr|H0YL12|H0YL12_HUMAN;tr|H0YKF0|H0YKF0_HUMAN;tr|H0YK49|H0YK49_HUMAN;tr|H0YNX6|H0YNX6_HUMAN;tr|H0YLU7|H0YLU7_HUMAN;sp|P13804|ETFA_HUMAN;sp|P13804-2|ETFA_HUMAN	58545136	30554980	4450918	38242288	8.04285e+06	17852144	0	FALSE
+56.063TYSYLTPDLWK+56.063	tr|E9PQD7|E9PQD7_HUMAN;tr|H0YEN5|H0YEN5_HUMAN;sp|P15880|RS2_HUMAN	26338012	15869898	1.03888e+06	14892838	3136788	7546144	0	FALSE
+56.063AQAALAVNISAAR	sp|P40227|TCPZ_HUMAN;sp|P40227-2|TCPZ_HUMAN	131909048	73693144	12425488	67731992	16246568	19597296	0	FALSE
+56.063ASTNAM+15.995LISAGLPPLK+56.063	sp|O43143|DHX15_HUMAN	44096384	23055732	4269379	19911652	4.03066e+06	15604781	0	FALSE
+56.063GINTLVTYDM+15.995VPEPK+56.063	tr|H3BNX8|H3BNX8_HUMAN;sp|P20674|COX5A_HUMAN	53914224	27816394	9995752	25286322	2.13258e+06	9864954	0.000969982	FALSE
+56.063ANNSQEPSPQLASSVASTR	tr|H0Y8Y3|H0Y8Y3_HUMAN;sp|Q96HC4|PDLI5_HUMAN;sp|Q96HC4-4|PDLI5_HUMAN;sp|Q96HC4-7|PDLI5_HUMAN	14383552	7520030	885641	6.81546e+06	959068	2262293	0	FALSE
+56.063VPADTEVVC+57.021APPTAYIDFAR	sp|P60174|TPIS_HUMAN;sp|P60174-1|TPIS_HUMAN	19051462	9050642	1054210	11842583	2.74054e+06	5.75525e+06	0.000969982	FALSE
+56.063VPAINVNDSVTK+56.063	sp|P23526|SAHH_HUMAN;sp|P23526-2|SAHH_HUMAN	121309472	54813728	1.91273e+06	56894304	7.39007e+06	26949350	0	FALSE
+56.063QIYPPINVLPSLSR	tr|C9JL73|C9JL73_HUMAN;sp|P15313|VATB1_HUMAN;sp|P21281|VATB2_HUMAN	7.59713e+06	4.15787e+06	452923	3941862	641438	1.15327e+06	0	FALSE
+56.063ATDAEADVASLNR	tr|Q6ZN40|Q6ZN40_HUMAN;tr|H0YKX5|H0YKX5_HUMAN;tr|Q5TCU8|Q5TCU8_HUMAN;tr|H0YKP3|H0YKP3_HUMAN;tr|Q5TCU3|Q5TCU3_HUMAN;tr|A7XZE4|A7XZE4_HUMAN;tr|A0A0S2Z4G6|A0A0S2Z4G6_HUMAN;sp|P07951|TPM2_HUMAN;sp|P07951-2|TPM2_HUMAN;sp|P09493|TPM1_HUMAN;sp|P09493-3|TPM1_HUMAN;sp|P09493-4|TPM1_HUMAN;sp|P09493-9|TPM1_HUMAN;sp|P09493-10|TPM1_HUMAN	16290780	5564929	0	9781312	3.12527e+06	4495593	0.000969982	FALSE
+56.063IVNQPSSLFGSK+56.063	sp|Q7Z6Z7|HUWE1_HUMAN;sp|Q7Z6Z7-2|HUWE1_HUMAN;sp|Q7Z6Z7-3|HUWE1_HUMAN	15390593	25263616	9933071	23235748	1.43643e+06	9695335	0.000969982	FALSE
+56.063VC+57.021EPC+57.021YEQLNR	tr|I3L1P5|I3L1P5_HUMAN;sp|O14964|HGS_HUMAN;sp|O14964-2|HGS_HUMAN	33092870	16332823	3.30791e+06	18806574	1.97546e+06	10684540	0	FALSE
+60.088IEDVTPIPSDSTR	tr|A0A2R8Y811|A0A2R8Y811_HUMAN;sp|P62263|RS14_HUMAN	570090624	286403296	56385996	301969984	115837664	154033664	0	FALSE
+56.063ANLPQSFQVDTSK+56.063	tr|Q60FE5|Q60FE5_HUMAN;tr|A0A087WWY3|A0A087WWY3_HUMAN;sp|P21333|FLNA_HUMAN;sp|P21333-2|FLNA_HUMAN	101616976	49521124	4.32088e+06	50576012	8.10587e+06	22834804	0	FALSE
+56.063VQVQDNEGC+57.021PVEALVK+56.063	tr|Q60FE5|Q60FE5_HUMAN;tr|A0A087WWY3|A0A087WWY3_HUMAN;sp|P21333|FLNA_HUMAN;sp|P21333-2|FLNA_HUMAN	38045628	14969065	695462	5561945	1.0557e+06	2.0638e+06	0	FALSE
+56.063QLSSEELEQFQK+56.063	tr|J3KR24|J3KR24_HUMAN;tr|A0A0A0MSX9|A0A0A0MSX9_HUMAN;sp|P41252|SYIC_HUMAN	25952062	11851336	58790992	36473988	3054779	31226168	0	FALSE
+56.063EQAEAEVASLNR	tr|Q5HYB6|Q5HYB6_HUMAN;tr|D6R904|D6R904_HUMAN;tr|A0A087WWU8|A0A087WWU8_HUMAN;sp|P06753-2|TPM3_HUMAN;sp|P06753-3|TPM3_HUMAN;sp|P06753-4|TPM3_HUMAN;sp|P06753-5|TPM3_HUMAN;sp|P06753-6|TPM3_HUMAN	28590362	12424672	38134088	23463386	7.19844e+06	13148755	0	FALSE
+56.063YVDIAIPC+57.021NNK+56.063	tr|A0A0C4DG17|A0A0C4DG17_HUMAN;tr|C9J9K3|C9J9K3_HUMAN;sp|P08865|RSSA_HUMAN	242072096	116813096	10142456	152240992	23639696	77445864	0	FALSE
+56.063SVQTTLQTDEVK+56.063	tr|B0QZ43|B0QZ43_HUMAN;tr|E5RHW4|E5RHW4_HUMAN;sp|O75477|ERLN1_HUMAN;sp|O94905|ERLN2_HUMAN;sp|O94905-2|ERLN2_HUMAN;sp|O94905-3|ERLN2_HUMAN	11236810	6072574	1.3781e+06	4.66215e+06	1.29559e+06	3.20168e+06	0	FALSE
+56.063YTTPEDATPEPGEDPR	tr|A0A0A0MR13|A0A0A0MR13_HUMAN;sp|Q5JWF2|GNAS1_HUMAN;sp|Q5JWF2-2|GNAS1_HUMAN;sp|P63092|GNAS2_HUMAN;sp|P63092-2|GNAS2_HUMAN;sp|P63092-3|GNAS2_HUMAN;sp|P63092-4|GNAS2_HUMAN	20709266	11295068	861955	11691712	2.51019e+06	6.58173e+06	0	FALSE
+56.063VQQVQPAMQAVIR	sp|Q96TA1|NIBL1_HUMAN;sp|Q96TA1-2|NIBL1_HUMAN	9010603	4420624	741871	5.47368e+06	2214726	1.6367e+06	0	FALSE
+56.063SSGLPNIPVQTISR	tr|G3V0E5|G3V0E5_HUMAN;sp|P02786|TFR1_HUMAN	271724480	117188296	11720029	131437552	25369232	56782588	0	FALSE
+56.063TFAPEEISAM+15.995VLTK+56.063	sp|P11021|BIP_HUMAN	2.72022e+06	1.59155e+06	543517	1.3243e+06	0	1.8215e+06	0	FALSE
+56.063TLQEVTQLSQEAQR	tr|H0YFD6|H0YFD6_HUMAN;tr|A0A2R8Y4F5|A0A2R8Y4F5_HUMAN;tr|A0A2R8YG21|A0A2R8YG21_HUMAN;tr|A0A2R8Y688|A0A2R8Y688_HUMAN;sp|P40939|ECHA_HUMAN	72603536	47303228	12815713	43516888	10664129	19327794	0	FALSE
+56.063ILTFDQLALDSPK+56.063	tr|G3V203|G3V203_HUMAN;tr|H0YHA7|H0YHA7_HUMAN;tr|J3QQ67|J3QQ67_HUMAN;tr|F8VUA6|F8VUA6_HUMAN;sp|Q07020|RL18_HUMAN;sp|Q07020-2|RL18_HUMAN	2.63614e+06	2.55572e+06	491224	484106	384586	515096	0	FALSE
+56.063LGSTEVASNVPK+56.063	tr|S4R3V3|S4R3V3_HUMAN;sp|Q9Y5A9|YTHD2_HUMAN;sp|Q9Y5A9-2|YTHD2_HUMAN	90714968	48016124	3.51237e+06	46843268	6.90986e+06	23837046	0	FALSE
+56.063VELPGTAVPSVPEDAAPASR	tr|G3XAL9|G3XAL9_HUMAN;sp|P55011|S12A2_HUMAN;sp|P55011-3|S12A2_HUMAN	18264314	7460218	3469026	9303382	1.75654e+06	4.97414e+06	0.000969982	FALSE
+56.063VDNSSLTGESEPQTR	tr|B1AKY9|B1AKY9_HUMAN;tr|M0R116|M0R116_HUMAN;tr|A0A0A0MT26|A0A0A0MT26_HUMAN;tr|A0A2R8YEY8|A0A2R8YEY8_HUMAN;tr|M0QXF2|M0QXF2_HUMAN;sp|P13637|AT1A3_HUMAN;sp|P13637-2|AT1A3_HUMAN;sp|P13637-3|AT1A3_HUMAN;sp|P05023|AT1A1_HUMAN;sp|P05023-2|AT1A1_HUMAN;sp|P05023-3|AT1A1_HUMAN;sp|P05023-4|AT1A1_HUMAN;sp|P50993|AT1A2_HUMAN;sp|P20648|ATP4A_HUMAN	27665198	13732696	1.70301e+06	14759985	3707056	7441098	0	FALSE
+56.063QAEMEGAVQSIQGELSK+56.063	sp|Q6NZI2|CAVN1_HUMAN;sp|Q6NZI2-2|CAVN1_HUMAN	19035940	10118527	195315	9734285	12033994	94325544	0	FALSE
+56.063LVLDPGEAPLVPVYSGK+56.063	sp|Q8NCF5|NF2IP_HUMAN	6.00281e+06	3.07804e+06	2.0386e+06	3.57955e+06	1.55158e+06	1.37436e+06	0	FALSE
+56.063VIVVGNPANTNC+57.021LTASK+56.063	tr|B9A041|B9A041_HUMAN;tr|C9JF79|C9JF79_HUMAN;tr|C9JRL4|C9JRL4_HUMAN;sp|P40925|MDHC_HUMAN;sp|P40925-2|MDHC_HUMAN;sp|P40925-3|MDHC_HUMAN	19088384	20941532	83541.9	116113808	92372496	838575	0.000969982	FALSE
+56.063ATENPEQVASEGLPEPVLR	tr|K7ES61|K7ES61_HUMAN;tr|K7ELF1|K7ELF1_HUMAN;tr|K7EKI4|K7EKI4_HUMAN;tr|X6RAY8|X6RAY8_HUMAN;tr|K7ELQ0|K7ELQ0_HUMAN;sp|Q9BYD3|RM04_HUMAN;sp|Q9BYD3-2|RM04_HUMAN	93822104	49020624	3.5043e+06	45302232	8570444	22199142	0.000969982	FALSE
+56.063VC+57.021ENIPIVLC+57.021GNK+56.063	tr|B5MDF5|B5MDF5_HUMAN;tr|B4DV51|B4DV51_HUMAN;tr|F5H018|F5H018_HUMAN;tr|J3KQE5|J3KQE5_HUMAN;sp|P62826|RAN_HUMAN	168242608	84152944	8.05585e+06	93054488	13733305	38843420	0	FALSE
+56.063GPDGLTAFEATDNQAIK+56.063	tr|C9JL85|C9JL85_HUMAN;sp|P58546|MTPN_HUMAN	37825708	15116483	9788495	16793388	6397041	4.51051e+06	0	FALSE
+56.063LASLFSSLEPQIQPVYVPVPK+56.063	tr|A2A2V2|A2A2V2_HUMAN;tr|Q5TCT4|Q5TCT4_HUMAN;tr|H7C5M1|H7C5M1_HUMAN;sp|P42696|RBM34_HUMAN;sp|P42696-2|RBM34_HUMAN	785464	385007	0	394421	0	304683	0	FALSE
+56.063NVQSVSIIDTELK+56.063	tr|H0YAL2|H0YAL2_HUMAN;sp|Q15645|PCH2_HUMAN;sp|Q15645-2|PCH2_HUMAN	23723860	9548920	2.23886e+06	11941237	1.96175e+06	6.56984e+06	0	FALSE
+56.063ILYSQC+57.021GDVMR	tr|G3V1V0|G3V1V0_HUMAN;tr|B7Z6Z4|B7Z6Z4_HUMAN;tr|J3KND3|J3KND3_HUMAN;tr|F8W1R7|F8W1R7_HUMAN;tr|G8JLA2|G8JLA2_HUMAN;tr|F8W1I5|F8W1I5_HUMAN;tr|F8VPF3|F8VPF3_HUMAN;sp|P60660|MYL6_HUMAN;sp|P60660-2|MYL6_HUMAN;sp|P14649|MYL6B_HUMAN	28214390	13010989	4.58724e+06	14306861	12304776	19181674	0	FALSE
+56.063AYSDQAIVNLLK+56.063	sp|Q92616|GCN1_HUMAN	14839413	6.78539e+06	467582	7898219	1.0189e+06	3364266	0	FALSE
+56.063TAVDSLVAYSVK+56.063	sp|Q07065|CKAP4_HUMAN	21480938	11676743	1826859	11890249	1.09541e+06	2.57554e+06	0	FALSE
+56.063LEQYTSAIEGTK+56.063	tr|C9J813|C9J813_HUMAN;tr|E7EX44|E7EX44_HUMAN;tr|E9PGZ1|E9PGZ1_HUMAN;sp|Q05682|CALD1_HUMAN;sp|Q05682-2|CALD1_HUMAN;sp|Q05682-3|CALD1_HUMAN;sp|Q05682-4|CALD1_HUMAN;sp|Q05682-5|CALD1_HUMAN;sp|Q05682-6|CALD1_HUMAN	25931882	12789946	2216768	15019974	2977252	5.28879e+06	0	FALSE
+56.063LISPLASPADGVK+56.063	sp|Q8WYP5|ELYS_HUMAN;sp|Q8WYP5-2|ELYS_HUMAN;sp|Q8WYP5-3|ELYS_HUMAN	45325372	22196542	2.96561e+06	32143264	12373712	16164647	0	FALSE
+56.063NALANPLYC+57.021PDYR	tr|H3BRG4|H3BRG4_HUMAN;tr|H3BSJ9|H3BSJ9_HUMAN;tr|H3BP04|H3BP04_HUMAN;sp|P22695|QCR2_HUMAN	18813516	10846484	1.03729e+06	10024226	2740325	6.24172e+06	0	FALSE
+56.063ITPSYVAFTPEGER	sp|P11021|BIP_HUMAN	249177888	119152688	17242364	126334424	26052348	89739192	0	FALSE
+56.063TVLGTPEVLLGALPGAGGTQR	tr|H0YFD6|H0YFD6_HUMAN;tr|A0A2R8YG21|A0A2R8YG21_HUMAN;tr|A0A2R8Y688|A0A2R8Y688_HUMAN;sp|P40939|ECHA_HUMAN	19498408	4.15089e+06	392486	7.03509e+06	1.88643e+06	5680744	0	FALSE
+56.063DC+57.021PLNAEAASSK+56.063	sp|Q10567|AP1B1_HUMAN;sp|Q10567-2|AP1B1_HUMAN;sp|Q10567-3|AP1B1_HUMAN;sp|Q10567-4|AP1B1_HUMAN	41973876	18865128	4.95567e+06	20220160	3.39408e+06	6.86255e+06	0	FALSE
+56.063GISAGAVQTAGK+56.063	tr|F5GWB7|F5GWB7_HUMAN;tr|F5H709|F5H709_HUMAN;sp|P46087|NOP2_HUMAN;sp|P46087-4|NOP2_HUMAN	130062336	61277428	11068367	64480732	15180199	33909836	0	FALSE
+56.063AQPSASLGVGYR	sp|Q96PK6|RBM14_HUMAN	67519944	20442312	4211785	17385116	6070831	15009602	0.000969982	FALSE
+56.063AEGPEVDVNLPK+56.063	sp|Q09666|AHNK_HUMAN	45051264	23249700	2.03087e+06	24316556	13537496	19581072	0	FALSE
+56.063VMTIPYQPM+15.995PASSPVIC+57.021AGGQDR	sp|Q15365|PCBP1_HUMAN	45781288	23290252	4.10159e+06	22408612	2.57108e+06	15297885	0	FALSE
+56.063TTANAIYC+57.021PPK+56.063	tr|J3QS13|J3QS13_HUMAN;sp|O00231|PSD11_HUMAN;sp|O00231-2|PSD11_HUMAN	77381616	30607860	26815476	41784088	7.02137e+06	18224010	0	FALSE
+56.063TIQFVDWC+57.021PTGFK+56.063	tr|C9J2C0|C9J2C0_HUMAN;tr|F5H5D3|F5H5D3_HUMAN;tr|A0A1W2PQM2|A0A1W2PQM2_HUMAN;tr|V9GZ17|V9GZ17_HUMAN;sp|Q9NY65|TBA8_HUMAN;sp|Q9NY65-2|TBA8_HUMAN;sp|P0DPH7|TBA3C_HUMAN;sp|P0DPH7-2|TBA3C_HUMAN;sp|P0DPH8|TBA3D_HUMAN;sp|Q6PEY2|TBA3E_HUMAN;sp|Q71U36|TBA1A_HUMAN;sp|Q71U36-2|TBA1A_HUMAN;sp|Q9BQE3|TBA1C_HUMAN	887326	307532	117847	210451	128231	196887	0	FALSE
+56.063DTSASAVAVGLK+56.063	tr|H0YFD6|H0YFD6_HUMAN;tr|A0A2R8Y4F5|A0A2R8Y4F5_HUMAN;sp|P40939|ECHA_HUMAN	54617300	31675214	4724614	32753394	5.63462e+06	24821066	0	FALSE
+56.063IYELAAGGTAVGTGLNTR	sp|P07954|FUMH_HUMAN;sp|P07954-2|FUMH_HUMAN	48713396	30182668	0	25390722	1.75682e+06	17184156	0	FALSE
+56.063SPASDTYIVFGEAK+56.063	tr|F8VNW4|F8VNW4_HUMAN;tr|F8W1N5|F8W1N5_HUMAN;tr|F8W0W4|F8W0W4_HUMAN;tr|H0YHX9|H0YHX9_HUMAN;tr|F8VZJ2|F8VZJ2_HUMAN;sp|E9PAV3|NACAM_HUMAN;sp|E9PAV3-2|NACAM_HUMAN;sp|Q13765|NACA_HUMAN	38909904	15102328	1290134	12734596	12229.8	5.6545e+06	0	FALSE
+56.063NEGNIFPNPEATFVK+56.063	sp|Q9Y5B9|SP16H_HUMAN	42840776	13488879	960098	13651186	1.91078e+06	4935087	0	FALSE
+56.063IYVDDGLISLQVK+56.063	tr|B4DNK4|B4DNK4_HUMAN;tr|H3BQ34|H3BQ34_HUMAN;tr|H3BTN5|H3BTN5_HUMAN;sp|P14618|KPYM_HUMAN;sp|P14618-2|KPYM_HUMAN;sp|P14618-3|KPYM_HUMAN	37237172	16684439	1.27247e+06	19575484	3.03769e+06	8450848	0.000969982	FALSE
+56.063SPPTVLVIC+57.021GPGNNGGDGLVC+57.021AR	tr|Q5T3I3|Q5T3I3_HUMAN;tr|Q5T3I4|Q5T3I4_HUMAN;sp|Q8NCW5|NNRE_HUMAN;sp|Q8NCW5-2|NNRE_HUMAN	7146639	10355571	3.89122e+06	1.91272e+06	5415894	449555	0	FALSE
+56.063ILC+57.021FYGPPGVGK+56.063	tr|K7EJE8|K7EJE8_HUMAN;tr|K7ER27|K7ER27_HUMAN;tr|K7EKE6|K7EKE6_HUMAN;sp|P36776|LONM_HUMAN;sp|P36776-2|LONM_HUMAN;sp|P36776-3|LONM_HUMAN	9624933	5621405	1.13245e+06	6.15794e+06	12700810	7232601	0	FALSE
+56.063LADPVTPVETILQR	sp|Q9NVN8|GNL3L_HUMAN	4211014	1.80919e+06	838514	2.19202e+06	437387	892870	0.000969982	FALSE
+56.063TATVYPEPQNK+56.063	sp|P48163|MAOX_HUMAN;sp|P48163-2|MAOX_HUMAN	25776390	10150892	1.36794e+06	10450393	1.88134e+06	4.76587e+06	0.000969982	FALSE
+56.063VQIAVANAQELLQR	sp|Q9Y5L4|TIM13_HUMAN	40086840	19812602	1935279	20793542	3.01458e+06	8284144	0	FALSE
+56.063SC+57.021ENLAPFNTALK+56.063	tr|A8MU58|A8MU58_HUMAN;sp|Q13155|AIMP2_HUMAN;sp|Q13155-2|AIMP2_HUMAN	47905232	23548792	2.75299e+06	31186060	4306735	13334709	0	FALSE
+56.063TYTDELTPIESAVSVFK+56.063	sp|O75489|NDUS3_HUMAN	2.55873e+06	1.22743e+06	115772	1.08601e+06	209507	603957	0	FALSE
+56.063C+57.021ITDTLQELVNQSK+56.063	tr|E9PF10|E9PF10_HUMAN;sp|O75694|NU155_HUMAN;sp|O75694-2|NU155_HUMAN	514702	252778	224892	405305	262469	325587	0.000969982	FALSE
+56.063GSELQLPFQAC+57.021LK+56.063	sp|Q6P2Q9|PRP8_HUMAN	2241881	1.03911e+06	161315	1.23421e+06	599773	369672	0	FALSE
[truncated: 4,753 more rows]

## Sheet: Fr3
Peptide	MatchedProteins	Quantity_1	Quantity_2	Quantity_3	Quantity_4	Quantity_5	Quantity_6	QValue	Decoy
+56.063SLLVIPNTLAVNAAQDSTDLVAK+56.063	tr|F5H282|F5H282_HUMAN;tr|E7EQR6|E7EQR6_HUMAN;sp|P17987|TCPA_HUMAN	46877596	42567108	15979320	14150701	3.9031e+06	12634689	0	FALSE
[truncated: 6,934 more rows]

## Sheet: Fr4
Peptide	MatchedProteins	Quantity_1	Quantity_2	Quantity_3	Quantity_4	Quantity_5	Quantity_6	QValue	Decoy
[truncated: 7,237 more rows]

[truncated: 4 more sheets: Fr5, Fr6, Fr7, Fr8]
